# Supplementary material for: Freshwater Detention by Oyster Reefs: Quantifying a Keystone Ecosystem Service
Source: PLoS One. 2016 Dec 9;11(12):e0167694. doi: 10.1371/journal.pone.0167694 (PMC5147930; doi:10.1371/journal.pone.0167694)
Supplement: S1 Dataset — 15-minute salinity, temperature, and water level data from the six monitoring stations shown in Fig 1. Data were decimated (Lanzos filter with half power of 30 h) to tide-filtered mean daily values for all subsequent analyses. (XLSX) [file pone.0167694.s001.xlsx]

## Sheet: Sheet1
			LC1-LAND			LC1-SEA			LC2-LAND			LC2-SEA			LC3-LND			LC3-SEA
Date	Time	Date/Time	Water Level (cm)	Salinity (PPT)	Temp C	Water Level (cm)	Salinity (PPT)	Temp C	Water Level (cm)	Salinity (PPT)	Temp C	Water Level (cm)	Salinity (PPT)	Temp C	Water Level (cm)	Salinity (PPT)	Temp C	Water Level (cm)	Salinity (PPT)	Temp C
2013-12-17	08:30:00	2013-12-17 08:30:00													17.02	5.74251	14.43
2013-12-17	08:45:00	2013-12-17 08:45:00							48.1364	1.39649	15.46	17.8455	2.48841	14.74	16.42	5.40774	14.73	11.13	10.4909	13.79
2013-12-17	09:00:00	2013-12-17 09:00:00							48.2364	1.34777	15.92	22.3455	2.46286	15.77	16.12	4.28982	15.04	15.23	6.55229	14.39
2013-12-17	09:15:00	2013-12-17 09:15:00	17.8	0.454334	15.62	10.5231	0.720904	14.27	49.5364	1.28597	16.2	25.5455	2.12817	16.29	16.32	4.62347	15.14	18.83	5.68785	14.66
2013-12-17	09:30:00	2013-12-17 09:30:00	21.7	0.407946	16.23	17.2231	0.720904	14.89	52.4364	1.15217	16.46	32.2455	1.7344	16.6	18.22	3.54995	15.46	25.63	9.71819	14.98
2013-12-17	09:45:00	2013-12-17 09:45:00	27.6	0.336203	16.82	23.4231	0.72511	15	56.8364	1.0326	16.64	39.2455	9.91546	16.6	21.22	3.46396	15.73	32.03	10.7809	15.04
2013-12-17	10:00:00	2013-12-17 10:00:00	33.5	0.298818	17.11	29.8231	0.537963	15.83	61.8364	2.10752	16.7	46.2455	18.4716	16.53	27.52	5.52411	15.63	40.03	11.0689	15.02
2013-12-17	10:15:00	2013-12-17 10:15:00	38.9	0.626816	16.24	36.6231	0.562648	16.29	69.0364	10.8149	16.51	52.7455	19.3693	16.47	35.32	8.77021	15.47	46.53	13.5721	15.66
2013-12-17	10:30:00	2013-12-17 10:30:00	45.2	0.786311	15.31	43.4231	18.4416	16.49	76.5364	15.1566	16.51	59.5455	19.6766	16.45	43.52	9.36857	15.64	52.73	18.529	16.11
2013-12-17	10:45:00	2013-12-17 10:45:00	52	3.20702	15.74	48.8231	18.2969	16.53	83.6364	16.189	16.51	64.5455	19.0871	16.45	52.52	9.8713	15.82	58.93	18.2505	16.05
2013-12-17	11:00:00	2013-12-17 11:00:00	57.7	10.3813	16.35	54.4231	16.6978	16.37	91.5364	16.1458	16.55	71.1455	19.4269	16.42	59.62	9.45652	15.91	64.23	17.817	16.04
2013-12-17	11:15:00	2013-12-17 11:15:00	64.6	12.788	16.44	61.5231	15.7544	16.19	98.1364	16.2647	16.57	78.0455	19.5065	16.39	64.32	9.70781	15.98	69.93	17.8633	16.07
2013-12-17	11:30:00	2013-12-17 11:30:00	71.5	13.6414	16.21	67.4231	15.8677	16.14	105.036	15.8704	16.63	83.2455	19.49	16.34	72.42	9.88689	16.3	77.13	17.67	15.98
2013-12-17	11:45:00	2013-12-17 11:45:00	78	14.2181	16.18	73.0231	15.9783	16.15	112.136	15.4149	16.68	89.5455	18.7832	16.24	81.02	11.006	16.27	82.93	17.3545	15.83
2013-12-17	12:00:00	2013-12-17 12:00:00	85.2	13.1171	15.97	79.1231	15.6385	16.1	117.636	15.3611	16.71	95.8455	17.9859	16.05	86.92	11.6625	16.18	88.53	16.9445	15.69
2013-12-17	12:15:00	2013-12-17 12:15:00	90.2	13.9269	15.95	86.0231	15.6196	16	123.736	15.8974	16.69	100.845	17.9314	15.94	91.92	12.3088	16.06	94.53	16.4108	15.51
2013-12-17	12:30:00	2013-12-17 12:30:00	95	14.5206	16.01	90.6231	16.2782	16.04	131.036	15.9217	16.69	107.045	17.926	15.88	97.92	13.2022	15.91	100.43	16.0269	15.36
2013-12-17	12:45:00	2013-12-17 12:45:00	102.9	16.2566	16.09	96.2231	16.752	15.99	135.736	15.9999	16.7	112.445	17.8333	15.87	102.02	14.0097	15.67	105.93	15.865	15.29
2013-12-17	13:00:00	2013-12-17 13:00:00	107.3	17.0394	16.01	101.623	16.8794	15.94	141.236	16.2782	16.56	116.745	17.8279	15.84	108.72	14.3091	15.48	109.13	15.4849	15.22
2013-12-17	13:15:00	2013-12-17 13:15:00	110.3	17.2268	16	104.323	16.9418	15.91	145.336	16.714	15.89	119.945	17.7816	15.72	112.12	14.7109	15.41	115.03	15.4553	15.22
2013-12-17	13:30:00	2013-12-17 13:30:00	111.9	17.2648	15.96	108.023	16.9418	15.87	149.036	16.9499	15.71	124.545	17.896	15.69	116.72	15.0357	15.39	117.43	15.528	15.22
2013-12-17	13:45:00	2013-12-17 13:45:00	115.4	17.3164	15.92	111.723	16.9608	15.86	152.736	16.9228	15.59	127.345	17.7952	15.67	119.32	14.7699	15.38	120.83	15.5738	15.22
2013-12-17	14:00:00	2013-12-17 14:00:00	117.1	17.3409	15.88	113.123	17.0042	15.8	153.236	17.0069	15.5	127.345	17.7026	15.63	119.22	15.2965	15.38	121.73	15.6277	15.23
2013-12-17	14:15:00	2013-12-17 14:15:00	120.5	17.4415	15.85	113.123	17.0367	15.77	151.936	17.1073	15.47	129.045	17.2811	15.55	118.62	15.2319	15.38	119.33	15.6142	15.23
2013-12-17	14:30:00	2013-12-17 14:30:00	114.1	18.1086	15.86	109.823	16.9201	15.8	151.036	17.091	15.47	126.045	16.7737	15.48	118.62	15.3422	15.39	118.43	15.6061	15.24
2013-12-17	14:45:00	2013-12-17 14:45:00	115.1	18.2068	15.83	109.523	16.9065	15.83	149.236	17.1344	15.56	124.545	16.4162	15.41	116.72	15.7032	15.39	116.43	15.5361	15.31
2013-12-17	15:00:00	2013-12-17 15:00:00	116	18.2259	15.82	107.223	17.0177	15.83	148.336	17.2023	15.57	121.945	16.6057	15.46	116.52	15.3207	15.39	114.13	15.4041	15.39
2013-12-17	15:15:00	2013-12-17 15:15:00	108.8	18.2287	15.83	104.623	16.836	15.95	147.036	17.2594	15.65	122.145	16.7547	15.46	114.22	15.0491	15.41	116.03	15.2373	15.53
2013-12-17	15:30:00	2013-12-17 15:30:00	108.1	18.2068	15.86	102.623	16.2431	16.18	142.836	17.4578	15.71	117.945	16.8116	15.57	111.52	15.5549	15.45	112.43	14.7002	15.74
2013-12-17	15:45:00	2013-12-17 15:45:00	106.5	17.9233	15.97	97.0231	16.0891	16.31	141.136	17.5013	15.86	114.545	16.5786	15.9	106.42	15.1997	15.55	107.33	14.7243	15.75
2013-12-17	16:00:00	2013-12-17 16:00:00	101.5	17.2295	16.25	94.3231	16.0432	16.39	136.436	17.4496	16.06	111.745	17.4741	15.78	101.22	15.1593	15.8	103.93	14.609	16.06
2013-12-17	16:15:00	2013-12-17 16:15:00	97.6	16.9174	16.39	92.7231	15.5415	16.6	132.436	17.3844	16.19	107.645	17.1154	15.88	100.02	15.458	15.77	101.03	14.4858	16.24
2013-12-17	16:30:00	2013-12-17 16:30:00	96.1	16.3513	16.58	92.3231	14.2395	16.88	130.736	17.1806	16.25	106.945	16.5651	16.01	97.92	14.6868	16.17	99.33	14.3359	16.4
2013-12-17	16:45:00	2013-12-17 16:45:00	92.5	15.3584	16.76	88.2231	14.0177	16.91	129.336	15.9271	16.42	102.745	15.388	16.39	97.02	14.3466	16.5	97.23	14.1994	16.53
2013-12-17	17:00:00	2013-12-17 17:00:00	91.1	15.3315	16.82	83.9231	13.9482	16.91	126.236	15.3073	16.5	102.145	15.4687	16.38	93.22	13.8041	16.61	96.03	13.6787	16.62
2013-12-17	17:15:00	2013-12-17 17:15:00	87.7	15.2319	16.83	82.2231	13.8868	16.92	123.336	14.778	16.53	95.8455	15.4634	16.35	89.82	14.1299	16.51	90.93	13.999	16.46
2013-12-17	17:30:00	2013-12-17 17:30:00	85	15.205	16.83	79.3231	13.9215	16.9	119.336	13.8148	16.52	91.9455	14.9524	16.4	89.02	14.0818	16.5	87.33	14.1486	16.37
2013-12-17	17:45:00	2013-12-17 17:45:00	80.9	14.6358	16.92	76.2231	14.186	16.85	116.336	12.8437	16.6	91.7455	14.376	16.47	84.12	12.979	16.62	85.83	13.5375	16.48
2013-12-17	18:00:00	2013-12-17 18:00:00	78.4	13.1862	17.01	72.0231	13.9936	16.88	113.436	12.7456	16.54	88.6455	13.7801	16.51	80.82	12.6554	16.67	79.63	12.8145	16.56
2013-12-17	18:15:00	2013-12-17 18:15:00	74.9	12.1397	17.05	68.9231	13.8308	16.89	110.536	12.3828	16.51	85.3455	13.3724	16.52	78.52	11.0846	16.73	80.53	12.5866	16.57
2013-12-17	18:30:00	2013-12-17 18:30:00	72.6	11.6546	17.07	68.5231	13.7027	16.91	108.436	9.06383	16.6	83.6455	12.8039	16.53	75.62	10.4257	16.8	77.83	12.5786	16.56
2013-12-17	18:45:00	2013-12-17 18:45:00	73.3	10.8463	17.09	66.7231	13.7001	16.9	107.936	8.95299	16.64	81.7455	12.4198	16.5	75.22	10.0194	16.82	76.73	12.7164	16.53
2013-12-17	19:00:00	2013-12-17 19:00:00	73.4	9.45135	17.13	67.4231	14.023	16.84	107.736	9.03289	16.67	83.7455	13.0799	16.44	76.02	9.16188	16.74	76.93	12.7853	16.51
2013-12-17	19:15:00	2013-12-17 19:15:00	73.5	9.20577	17.14	67.7231	14.6358	16.74	108.436	9.07673	16.66	84.1455	13.5881	16.4	76.92	8.07799	16.68	76.03	12.8728	16.5
2013-12-17	19:30:00	2013-12-17 19:30:00	74.9	12.6184	16.88	69.8231	15.1405	16.65	109.736	8.97876	16.6	84.2455	14.2984	16.36	77.32	8.5287	16.67	78.63	12.7031	16.48
2013-12-17	19:45:00	2013-12-17 19:45:00	77.3	15.8056	16.65	72.7231	15.7247	16.52	111.036	8.95041	16.57	87.5455	15.8164	16.22	79.02	9.34788	16.65	79.63	12.531	16.44
2013-12-17	20:00:00	2013-12-17 20:00:00	78.6	16.3188	16.56	71.8231	16.1917	16.42	112.436	9.01226	16.6	87.4455	16.2458	16.19	79.32	11.7151	16.57	80.33	12.5707	16.41
2013-12-17	20:15:00	2013-12-17 20:15:00	79.1	16.2945	16.54	73.4231	16.4568	16.29	113.436	10.0636	16.63	90.0455	16.3756	16.17	80.82	11.3995	16.32	82.43	12.666	16.39
2013-12-17	20:30:00	2013-12-17 20:30:00	81.2	16.2837	16.53	77.5231	16.5569	16.23	115.836	13.1915	16.52	92.1455	16.4893	16.17	82.52	11.3733	16.29	85.63	12.788	16.37
2013-12-17	20:45:00	2013-12-17 20:45:00	84.1	16.2891	16.51	78.5231	16.584	16.17	117.836	13.3697	16.5	96.2455	16.5299	16.16	85.72	11.7204	16.33	88.13	13.0401	16.32
2013-12-17	21:00:00	2013-12-17 21:00:00	89.5	16.2053	16.34	83.6231	16.6273	16.15	122.036	13.3937	16.47	97.1455	16.6436	16.12	90.72	13.3298	16.31	92.13	13.9189	16.2
2013-12-17	21:15:00	2013-12-17 21:15:00	93.3	16.2107	16.23	87.2231	16.7249	16.13	126.036	13.5695	16.42	103.645	16.8279	15.99	94.32	14.1486	16.2	96.43	14.6171	16.03
2013-12-17	21:30:00	2013-12-17 21:30:00	99.2	16.4243	16.12	90.5231	16.7926	16.12	131.536	14.88	16.23	106.645	16.9797	15.89	100.22	15.0653	16.07	101.33	15.4903	15.81
2013-12-17	21:45:00	2013-12-17 21:45:00	101.5	16.9119	16.07	95.4231	16.8848	16.12	135.036	15.2104	16.12	110.145	17.2376	15.8	104.12	15.8137	15.93	104.23	15.776	15.77
2013-12-17	22:00:00	2013-12-17 22:00:00	104	17.3327	16.03	98.7231	16.9526	16.05	138.336	16.0215	15.96	114.745	17.5149	15.72	107.72	16.035	15.84	109.53	16.2107	15.73
2013-12-17	22:15:00	2013-12-17 22:15:00	109	17.417	15.99	104.823	17.0747	15.94	143.236	16.4784	15.69	119.045	17.6972	15.63	109.32	16.2701	15.75	112.13	16.8685	15.61
2013-12-17	22:30:00	2013-12-17 22:30:00	115.7	17.4496	15.95	108.923	17.2702	15.91	150.636	17.0015	15.54	126.045	18.1223	15.57	118.22	16.6653	15.64	118.23	17.5394	15.38
2013-12-17	22:45:00	2013-12-17 22:45:00	118.9	17.3518	15.86	115.423	17.6754	15.92	153.836	16.8848	15.56	129.245	18.7258	15.56	121.42	16.8685	15.5	121.73	18.0977	15.33
2013-12-17	23:00:00	2013-12-17 23:00:00	123.5	18.3133	15.83	119.923	18.0568	15.84	160.936	16.7222	15.52	131.945	19.2542	15.6	126.02	17.0964	15.4	127.53	18.3542	15.32
2013-12-17	23:15:00	2013-12-17 23:15:00	129.1	18.9173	15.81	123.723	18.5946	15.71	164.936	18.7614	15.46	140.145	20.0998	15.65	132.22	17.2404	15.37	133.43	18.7395	15.31
2013-12-17	23:30:00	2013-12-17 23:30:00	133.5	20.0201	15.73	127.123	19.4708	15.59	168.336	20.0118	15.47	143.545	20.8131	15.7	135.22	17.3735	15.35	136.93	19.1473	15.33
2013-12-17	23:45:00	2013-12-17 23:45:00	135.2	20.4135	15.63	130.123	20.0091	15.57	171.336	19.9761	15.46	146.645	21.3211	15.73	139.42	17.4986	15.31	141.63	19.6684	15.31
2013-12-18	00:00:00	2013-12-18	138.2	20.9952	15.6	135.123	20.4603	15.59	173.436	20.4962	15.49	147.645	21.6225	15.75	141.72	17.7135	15.32	145.03	20.0256	15.34
2013-12-18	00:15:00	2013-12-18 00:15:00	140.2	21.8328	15.68	136.123	20.9511	15.65	176.336	20.6091	15.51	152.345	21.8134	15.74	144.42	18.1441	15.32	143.73	20.3475	15.34
2013-12-18	00:30:00	2013-12-18 00:30:00	141.9	22.1764	15.74	139.623	21.3653	15.71	177.136	20.6146	15.5	153.045	22.0433	15.69	146.52	18.3242	15.32	146.63	20.7083	15.4
2013-12-18	00:45:00	2013-12-18 00:45:00	145.1	22.4287	15.76	139.723	21.7525	15.77	179.736	20.6091	15.48	152.945	21.999	15.64	147.62	18.4662	15.33	148.13	21.1664	15.48
2013-12-18	01:00:00	2013-12-18 01:00:00	142.7	22.5425	15.77	138.723	21.9768	15.78	179.236	20.5926	15.44	153.045	21.9879	15.62	147.02	18.6739	15.37	150.33	21.4372	15.52
2013-12-18	01:15:00	2013-12-18 01:15:00	142.7	22.6092	15.78	139.423	22.0073	15.79	179.036	20.6532	15.46	154.545	22.1375	15.63	146.22	18.8352	15.4	148.63	21.6169	15.52
2013-12-18	01:30:00	2013-12-18 01:30:00	144.5	22.6369	15.8	136.023	22.0683	15.8	179.236	20.9869	15.57	153.045	22.1098	15.67	147.22	19.1035	15.43	145.43	21.628	15.48
2013-12-18	01:45:00	2013-12-18 01:45:00	144.5	22.6786	15.82	135.023	22.0932	15.81	176.136	21.2078	15.64	150.845	21.7387	15.7	142.52	19.1391	15.43	144.63	21.6446	15.45
2013-12-18	02:00:00	2013-12-18 02:00:00	137.2	22.7202	15.83	129.823	22.0766	15.82	172.236	21.451	15.66	148.445	21.5146	15.71	141.32	19.2103	15.43	138.23	21.3432	15.32
2013-12-18	02:15:00	2013-12-18 02:15:00	133.7	22.7619	15.84	126.623	22.0212	15.83	168.036	21.6889	15.67	143.845	21.498	15.72	137.92	19.2021	15.43	137.83	21.0532	15.45
2013-12-18	02:30:00	2013-12-18 02:30:00	133.6	22.773	15.83	122.723	21.9547	15.83	168.036	21.6834	15.65	139.745	21.8744	15.74	134.52	19.2898	15.46	134.23	20.9456	15.44
2013-12-18	02:45:00	2013-12-18 02:45:00	124.9	22.7313	15.84	121.323	21.8799	15.83	158.836	21.6197	15.66	135.845	22.29	15.75	127.72	19.2377	15.46	129.73	20.8793	15.4
2013-12-18	03:00:00	2013-12-18 03:00:00	120	22.6425	15.84	115.123	21.5284	15.81	153.436	21.5948	15.64	128.445	22.2651	15.7	121.92	19.1281	15.44	121.33	20.3557	15.35
2013-12-18	03:15:00	2013-12-18 03:15:00	116	22.2706	15.83	109.123	19.1829	15.72	148.736	21.2631	15.6	123.945	22.2346	15.71	116.52	19.0049	15.43	116.93	19.4379	15.38
2013-12-18	03:30:00	2013-12-18 03:30:00	107.3	21.0007	15.75	100.423	18.2532	15.64	143.236	18.7422	15.44	115.645	21.7775	15.68	108.82	18.7969	15.43	109.13	18.7012	15.41
2013-12-18	03:45:00	2013-12-18 03:45:00	101.5	19.9403	15.71	95.2231	17.3545	15.63	136.736	17.8551	15.53	109.545	21.5506	15.66	102.72	18.5044	15.47	104.23	16.7384	15.39
2013-12-18	04:00:00	2013-12-18 04:00:00	93.6	16.2918	15.68	88.1231	14.8585	15.6	130.036	15.4499	15.72	103.645	20.9124	15.63	96.82	18.286	15.5	96.43	15.1217	15.52
2013-12-18	04:15:00	2013-12-18 04:15:00	88.1	14.3171	15.76	82.2231	14.0577	15.66	124.036	14.9471	15.63	97.0455	20.4603	15.63	90.72	17.9505	15.54	90.53	14.7056	15.39
2013-12-18	04:30:00	2013-12-18 04:30:00	81.4	11.8943	15.93	75.6231	13.4736	15.77	118.336	14.7136	15.64	90.2455	20.1108	15.63	85.22	17.5503	15.6	84.23	14.5608	15.56
2013-12-18	04:45:00	2013-12-18 04:45:00	75.3	11.1213	16.08	69.2231	12.0077	15.92	112.136	14.2797	15.64	83.4455	16.8658	15.54	78.92	15.5118	15.69	77.23	14.0444	15.51
2013-12-18	05:00:00	2013-12-18 05:00:00	69.4	10.251	16.17	62.2231	10.8463	16.04	106.236	13.4949	15.59	78.2455	16.6084	15.54	73.32	14.2449	15.74	71.03	13.4043	15.54
2013-12-18	05:15:00	2013-12-18 05:15:00	63.8	9.19028	16.24	55.4231	10.0792	16.07	100.036	13.157	15.51	70.4455	15.5334	15.52	68.02	13.8841	15.77	63.63	13.165	15.52
2013-12-18	05:30:00	2013-12-18 05:30:00	58.3	7.70819	16.28	49.5231	8.67508	16.12	94.6364	13.2474	15.51	63.9455	14.7243	15.34	62.62	12.9073	15.74	58.13	12.8331	15.47
2013-12-18	05:45:00	2013-12-18 05:45:00	53.2	6.86441	16.35	44.1231	7.83555	16.13	89.6364	12.9073	15.45	58.9455	14.5822	15.26	57.12	12.248	15.64	52.03	12.6766	15.43
2013-12-18	06:00:00	2013-12-18 06:00:00	48.8	5.7624	16.41	38.7231	5.52163	16.28	84.9364	12.727	15.4	53.4455	14.4831	15.25	52.72	11.7257	15.56	47.23	12.5574	15.4
2013-12-18	06:15:00	2013-12-18 06:15:00	44.7	5.15836	16.47	34.0231	4.70413	16.33	80.7364	12.3987	15.39	48.8455	14.039	15.27	48.52	11.7915	15.49	42.33	12.5283	15.36
2013-12-18	06:30:00	2013-12-18 06:30:00	40.9	4.46979	16.53	29.6231	3.90763	16.38	76.8364	11.5073	15.44	44.4455	11.9312	15.35	44.52	11.5494	15.42	38.03	12.4913	15.3
2013-12-18	06:45:00	2013-12-18 06:45:00	37.7	3.55952	16.59	25.2231	3.36385	16.39	73.0364	9.32203	15.51	39.6455	10.4074	15.45	41.22	11.6783	15.34	33.23	12.4463	15.22
2013-12-18	07:00:00	2013-12-18 07:00:00	34.5	2.67951	16.62	21.6231	2.74737	16.4	69.9364	7.63694	15.56	35.9455	9.47723	15.5	37.62	11.6677	15.27	29.33	12.4198	15.15
2013-12-18	07:15:00	2013-12-18 07:15:00	31.6	2.02284	16.64	18.4231	2.17179	16.42	66.4364	6.96534	15.58	32.4455	8.77278	15.55	34.62	11.7362	15.21	25.83	12.3881	15.09
2013-12-18	07:30:00	2013-12-18 07:30:00	29.1	1.29258	16.68	15.3231	1.62635	16.45	64.1364	5.38795	15.64	29.6455	7.62422	15.61	31.92	11.86	15.16	22.93	12.3749	15.03
2013-12-18	07:45:00	2013-12-18 07:45:00	26.9	0.905567	16.7	12.8231	1.19372	16.45	61.3364	4.60881	15.68	27.0455	6.97039	15.68	29.52	11.6625	15.06	20.13	12.359	14.97
2013-12-18	08:00:00	2013-12-18 08:00:00	25	0.699905	16.7	10.1231	0.873491	16.45	58.6364	4.22189	15.69	24.4455	5.93168	15.76	27.12	11.5309	14.92	17.33	12.3828	14.89
2013-12-18	08:15:00	2013-12-18 08:15:00	23.3	0.58122	16.69	8.12308	0.758826	16.4	56.8364	3.31388	15.75	22.3455	5.14358	15.81	25.02	9.97782	14.82	15.33	12.3828	14.83
2013-12-18	08:30:00	2013-12-18 08:30:00	21.6	0.537963	16.65	6.22308	0.704101	16.3	54.9364	2.90935	15.83	20.4455	4.5722	15.79	23.32	8.59544	14.8	13.53	12.3934	14.79
2013-12-18	08:45:00	2013-12-18 08:45:00	20.1	0.525655	16.56	4.72308	0.683142	16.03	53.3364	2.70991	15.87	18.9455	4.08627	15.75	21.52	7.90184	14.87	11.73	12.4039	14.74
2013-12-18	09:00:00	2013-12-18 09:00:00	19.1	0.599839	16.37	3.42308	0.672682	15.75	51.3364	2.2247	15.96	17.5455	3.43056	15.83	19.72	7.10937	14.98	9.93	12.3061	14.62
2013-12-18	09:15:00	2013-12-18 09:15:00	18.3	0.691519	15.92	3.12308	0.00114914	15.81	50.4364	1.6084	16.07	16.5455	3.29962	15.83	18.82	6.85684	15.07	9.43	12.1846	14.64
2013-12-18	09:30:00	2013-12-18 09:30:00	17.3	0.765162	15.53	3.22308	0.00114914	15.87	49.0364	1.37211	16.16	17.2455	2.50468	15.96	18.22	6.08136	15.34	10.43	10.9877	14.65
2013-12-18	09:45:00	2013-12-18 09:45:00	17.3	0.720904	15.74	4.52308	0.718802	15.91	49.5364	1.15872	16.29	19.1455	1.82939	16.21	16.32	5.87438	15.5	12.23	9.70003	14.66
2013-12-18	10:00:00	2013-12-18 10:00:00	18.1	0.714599	15.85	7.72308	0.777846	15.95	50.2364	0.969991	16.43	22.8455	1.4765	16.4	17.82	5.38301	15.67	16.43	8.08566	14.75
2013-12-18	10:15:00	2013-12-18 10:15:00	19.9	0.562648	16.31	13.1231	0.805384	15.99	50.8364	0.871356	16.58	27.0455	1.15217	16.61	17.62	5.21754	15.81	21.43	7.48191	14.97
2013-12-18	10:30:00	2013-12-18 10:30:00	23.3	0.375923	16.96	17.5231	0.81812	16.06	55.1364	0.843639	16.67	33.1455	1.30801	16.76	19.92	5.44238	15.81	27.63	5.57864	15.64
2013-12-18	10:45:00	2013-12-18 10:45:00	28.7	0.330277	17.2	24.1231	0.884173	16.07	59.3364	0.779961	16.82	40.1455	18.0105	16.59	24.82	3.63851	16.17	33.73	3.6457	16.14
2013-12-18	11:00:00	2013-12-18 11:00:00	34.5	0.310585	17.31	30.3231	0.858555	16.14	63.9364	0.976453	16.94	46.2455	21.4759	16.41	29.22	3.91004	16.26	40.33	3.6481	16.17
2013-12-18	11:15:00	2013-12-18 11:15:00	39.5	0.316482	17.42	36.4231	1.08465	16.72	69.7364	7.63948	16.78	53.0455	14.7807	16.36	35.52	6.10384	16.39	46.53	7.83045	15.91
2013-12-18	11:30:00	2013-12-18 11:30:00	46.1	0.916279	16.62	43.1231	20.678	16.94	77.0364	11.326	16.74	59.3455	19.2789	16.45	44.72	5.68536	16.38	53.33	10.2875	15.94
2013-12-18	11:45:00	2013-12-18 11:45:00	52.7	3.25448	16.73	49.8231	21.3018	16.78	84.2364	11.9338	16.76	67.1455	21.9159	16.34	52.12	6.38163	16.35	59.63	12.5919	16.21
2013-12-18	12:00:00	2013-12-18 12:00:00	59.9	11.5152	16.95	56.6231	20.8766	16.67	92.1364	11.8969	16.79	72.3455	20.4824	16.26	60.52	6.06888	16.51	65.33	20.758	16.23
2013-12-18	12:15:00	2013-12-18 12:15:00	67.6	15.0518	16.97	62.9231	20.5788	16.61	99.9364	11.5309	16.85	79.9455	19.298	16.22	67.82	6.11633	16.63	73.03	21.3239	16.21
2013-12-18	12:30:00	2013-12-18 12:30:00	74.4	17.5856	16.88	69.9231	18.9064	16.55	106.936	11.4968	16.91	86.0455	17.7217	16.2	75.42	9.65596	16.62	79.33	20.9925	16.18
2013-12-18	12:45:00	2013-12-18 12:45:00	79.1	16.2728	16.92	75.2231	18.2177	16.51	114.136	11.5336	16.99	92.8455	16.6111	16.14	83.42	11.2026	16.39	85.63	21.0063	16.18
2013-12-18	13:00:00	2013-12-18 13:00:00	86.4	15.7948	16.55	80.4231	17.0666	16.43	120.936	11.6862	17.09	99.0455	16.427	16.11	90.52	12.0974	16.32	91.23	20.5375	16.15
2013-12-18	13:15:00	2013-12-18 13:15:00	90.6	15.4984	16.49	87.4231	16.8414	16.34	125.536	11.8442	17.13	102.145	16.2566	16.13	93.72	12.4833	16.26	95.53	20.1218	16.09
2013-12-18	13:30:00	2013-12-18 13:30:00	96.5	15.3611	16.48	89.8231	17.0992	16.32	131.036	12.2955	16.91	106.445	16.2188	16.14	98.82	13.3884	16.22	99.53	19.6904	15.97
2013-12-18	13:45:00	2013-12-18 13:45:00	101.1	15.9136	16.5	95.2231	17.3953	16.34	134.436	12.6422	16.71	110.245	18.5809	16.13	100.72	14.0604	16.13	105.83	19.2295	15.89
2013-12-18	14:00:00	2013-12-18 14:00:00	102.9	15.7868	16.55	97.8231	17.4986	16.35	139.736	12.979	16.46	114.745	18.8325	16.12	106.92	14.5581	16.07	108.33	19.0515	15.85
2013-12-18	14:15:00	2013-12-18 14:15:00	106.7	15.8488	16.51	102.223	17.7163	16.32	141.436	13.6041	16.26	115.445	19.7892	16.1	108.12	14.939	15.99	109.03	19.0241	15.83
2013-12-18	14:30:00	2013-12-18 14:30:00	108.1	17.167	16.38	102.923	18.1441	16.21	145.136	15.0223	16.04	117.945	19.9239	16.03	108.82	16.2377	15.85	111.13	19.0076	15.81
2013-12-18	14:45:00	2013-12-18 14:45:00	107.8	17.8279	16.34	103.523	18.3761	16.17	144.436	14.3198	16.33	118.245	19.49	15.87	110.82	16.3973	15.78	113.33	18.8653	15.76
2013-12-18	15:00:00	2013-12-18 15:00:00	108.3	18.1332	16.26	103.123	18.6219	16.18	140.836	15.3638	16.27	119.945	19.0104	15.72	110.42	16.7872	15.77	112.43	18.7149	15.73
2013-12-18	15:15:00	2013-12-18 15:15:00	106.5	18.3296	16.25	101.123	18.6192	16.19	142.236	15.8704	16.09	118.245	18.6629	15.67	109.62	16.7303	15.73	110.03	18.4115	15.69
2013-12-18	15:30:00	2013-12-18 15:30:00	105.3	18.4389	16.25	100.723	18.7039	16.18	140.136	16.6111	16.05	115.245	18.693	15.67	108.72	16.4054	15.7	110.53	18.1386	15.67
2013-12-18	15:45:00	2013-12-18 15:45:00	103.6	18.4689	16.24	96.8231	18.7258	16.18	139.836	17.0069	16.04	115.045	18.6602	15.66	104.82	16.6869	15.77	107.63	17.9069	15.64
2013-12-18	16:00:00	2013-12-18 16:00:00	102.8	18.4771	16.26	96.3231	18.7696	16.17	136.236	17.3028	16.04	110.845	18.7559	15.64	102.42	16.6598	15.78	104.23	17.8143	15.63
2013-12-18	16:15:00	2013-12-18 16:15:00	98.6	18.4744	16.28	94.5231	18.8462	16.17	132.936	17.4306	16.04	108.245	18.775	15.61	102.92	16.6084	15.75	101.73	17.7979	15.62
2013-12-18	16:30:00	2013-12-18 16:30:00	95.2	18.4853	16.3	88.6231	18.8544	16.18	130.636	17.6645	16.02	106.145	18.7231	15.58	97.82	16.4405	15.86	97.93	17.7326	15.61
2013-12-18	16:45:00	2013-12-18 16:45:00	91.3	18.4498	16.31	86.2231	18.8489	16.2	126.736	17.8034	16.01	101.945	18.6903	15.58	92.02	16.3242	16.2	93.43	17.6564	15.62
2013-12-18	17:00:00	2013-12-18 17:00:00	87.7	16.798	16.43	81.9231	18.7149	16.23	122.636	17.8742	16.01	97.9455	18.6684	15.62	89.82	16.5596	15.97	92.53	17.5856	15.61
2013-12-18	17:15:00	2013-12-18 17:15:00	85.5	15.7059	16.62	79.0231	18.8817	16.2	119.936	17.9314	16.01	93.5455	18.7121	15.64	86.72	16.2431	15.9	88.33	17.5557	15.61
2013-12-18	17:30:00	2013-12-18 17:30:00	82.3	14.8451	16.76	75.6231	18.9036	16.22	117.036	17.9778	16.01	91.7455	18.7258	15.66	85.22	15.6573	16.06	84.93	17.4605	15.59
2013-12-18	17:45:00	2013-12-18 17:45:00	78.6	13.7321	16.89	73.8231	18.8927	16.21	113.936	17.9832	16.01	89.1455	18.6657	15.65	81.02	15.5253	16.17	82.53	17.4197	15.59
2013-12-18	18:00:00	2013-12-18 18:00:00	77.6	14.6922	16.82	71.8231	18.9255	16.22	112.336	18.0214	16.02	88.5455	18.6657	15.63	79.82	15.0921	16.42	80.83	17.4877	15.66
2013-12-18	18:15:00	2013-12-18 18:15:00	75.5	15.0088	16.72	70.6231	18.9146	16.25	110.836	17.9887	16.03	84.5455	18.745	15.65	78.52	13.8761	16.61	78.73	17.5176	15.77
2013-12-18	18:30:00	2013-12-18 18:30:00	74.6	14.031	16.74	68.4231	18.92	16.25	109.136	17.956	16.09	84.3455	18.8188	15.62	76.22	12.7933	16.71	75.83	17.621	15.8
2013-12-18	18:45:00	2013-12-18 18:45:00	71.4	11.5888	17.02	64.4231	18.9419	16.25	106.336	16.8794	16.34	80.4455	18.879	15.58	73.92	12.3273	16.77	74.03	17.7598	15.81
2013-12-18	19:00:00	2013-12-18 19:00:00	68.7	9.92845	17.19	63.2231	18.9529	16.25	103.936	15.3745	16.63	78.0455	18.9803	15.55	70.82	11.5572	16.84	73.03	17.8497	15.84
2013-12-18	19:15:00	2013-12-18 19:15:00	67.2	9.62485	17.2	61.0231	18.9419	16.26	101.636	7.30432	17.08	75.8455	19.0131	15.59	69.52	9.14123	16.92	68.83	17.9778	15.86
2013-12-18	19:30:00	2013-12-18 19:30:00	65.8	8.99422	17.18	60.2231	18.9584	16.27	100.136	9.56526	16.85	75.6455	18.9721	15.72	68.02	7.76675	16.81	69.43	18.2314	15.76
2013-12-18	19:45:00	2013-12-18 19:45:00	65.1	7.95032	17.17	60.0231	18.9638	16.29	99.5364	9.96483	16.89	74.9455	19.0898	15.66	67.42	7.50476	16.71	68.73	18.346	15.76
2013-12-18	20:00:00	2013-12-18 20:00:00	64.7	7.01585	17.17	60.4231	18.9721	16.3	100.136	13.2527	16.65	76.5455	19.1994	15.65	68.42	7.32206	16.65	69.73	18.2805	15.69
2013-12-18	20:15:00	2013-12-18 20:15:00	66.5	12.3987	16.96	61.5231	19.0186	16.3	100.836	17.3028	16.48	77.3455	19.3721	15.68	68.02	9.36081	16.6	70.43	18.4307	15.7
2013-12-18	20:30:00	2013-12-18 20:30:00	67.2	18.065	16.51	61.9231	19.1829	16.26	102.136	17.6128	16.41	77.9455	19.4214	15.68	69.92	12.4992	16.46	70.83	18.7559	15.72
2013-12-18	20:45:00	2013-12-18 20:45:00	68.8	19.4516	16.27	63.4231	19.1912	16.12	103.536	17.9042	16.39	80.0455	19.5778	15.69	70.52	14.4858	16.19	73.83	19.1884	15.82
2013-12-18	21:00:00	2013-12-18 21:00:00	70.8	19.5202	16.24	65.7231	19.3556	16.15	105.436	17.8551	16.29	80.9455	19.7453	15.71	73.12	15.3638	15.99	74.33	19.3721	15.76
2013-12-18	21:15:00	2013-12-18 21:15:00	72.8	19.0953	16.22	67.5231	19.5504	16.14	107.336	17.6918	16.18	84.7455	20.0008	15.7	75.42	16.0621	15.86	77.13	19.6849	15.68
2013-12-18	21:30:00	2013-12-18 21:30:00	76.4	19.1775	16.21	71.8231	20.0916	16.1	110.736	17.6591	16.09	87.5455	20.5127	15.76	78.32	17.6428	15.65	80.43	20.5816	15.84
2013-12-18	21:45:00	2013-12-18 21:45:00	79.1	19.4242	16.06	74.4231	20.0943	16.08	113.936	18.1441	16.11	90.6455	21.2023	15.86	81.92	18.0677	15.66	83.13	21.7138	15.77
2013-12-18	22:00:00	2013-12-18 22:00:00	84.3	19.6547	15.98	79.1231	20.1933	16.1	118.436	18.2614	16	94.8455	22.071	15.92	86.12	18.9392	15.64	88.13	22.3011	15.85
2013-12-18	22:15:00	2013-12-18 22:15:00	88.5	19.9293	15.95	83.1231	20.4163	16.11	122.736	18.3569	15.9	100.345	22.8175	16.04	89.82	19.9926	15.65	92.13	23.1177	15.95
2013-12-18	22:30:00	2013-12-18 22:30:00	93.8	20.2731	15.95	88.6231	20.8517	16.05	128.236	18.5837	15.9	104.345	23.3459	16.09	96.12	19.8606	15.69	97.23	23.5018	15.97
2013-12-18	22:45:00	2013-12-18 22:45:00	100.3	20.929	15.97	95.1231	21.2907	16.02	133.536	19.246	15.79	111.745	23.9032	16.03	102.02	21.0946	15.77	103.03	23.5993	15.93
2013-12-18	23:00:00	2013-12-18 23:00:00	104.9	21.5423	15.97	100.023	21.891	15.92	140.436	20.6146	15.68	116.645	24.2129	16.02	107.92	20.9897	15.81	109.43	23.6495	15.88
2013-12-18	23:15:00	2013-12-18 23:15:00	111.2	22.0516	15.86	105.323	22.4676	15.82	146.036	21.9104	15.7	120.445	24.4	16.01	114.22	21.1388	15.82	113.83	23.9673	15.87
2013-12-18	23:30:00	2013-12-18 23:30:00	116.5	22.0849	15.82	111.923	22.7841	15.81	150.536	22.3954	15.72	126.245	24.6823	15.92	118.42	21.404	15.83	120.53	24.333	15.89
2013-12-18	23:45:00	2013-12-18 23:45:00	121.4	22.4287	15.82	115.323	22.9953	15.81	155.236	22.7147	15.72	131.045	24.8417	15.9	122.82	21.7166	15.84	124.23	24.5257	15.91
2013-12-19	00:00:00	2013-12-19	125.2	22.773	15.82	121.323	23.1094	15.81	160.036	22.7091	15.72	135.845	24.9648	15.9	128.22	21.866	15.85	128.73	24.618	15.92
2013-12-19	00:15:00	2013-12-19 00:15:00	130	22.9259	15.83	124.223	23.1845	15.82	164.236	20.3888	15.45	139.245	24.9537	15.89	132.52	21.8467	15.87	132.13	24.6292	15.92
2013-12-19	00:30:00	2013-12-19 00:30:00	132.2	23.0037	15.83	127.123	23.2568	15.82	167.436	22.7508	15.73	143.845	24.8557	15.89	134.82	21.8854	15.89	137.03	24.6459	15.93
2013-12-19	00:45:00	2013-12-19 00:45:00	134.2	23.0315	15.83	130.423	23.3292	15.83	170.236	23.3236	15.83	143.545	24.7634	15.88	137.02	21.9048	15.91	138.83	24.6571	15.93
2013-12-19	01:00:00	2013-12-19 01:00:00	135	23.1288	15.83	129.723	23.3487	15.83	172.236	23.5547	15.87	146.545	24.6711	15.88	140.02	22.2041	15.92	138.93	24.6711	15.93
2013-12-19	01:15:00	2013-12-19 01:15:00	138.6	23.3208	15.84	132.923	23.3988	15.83	171.736	23.7805	15.88	147.345	24.7914	15.88	139.62	21.6031	15.92	141.33	24.7214	15.94
2013-12-19	01:30:00	2013-12-19 01:30:00	135.8	23.4099	15.85	131.423	23.4016	15.84	172.736	23.9645	15.88	146.945	24.4084	15.87	138.12	22.6258	15.9	139.93	24.8193	15.94
2013-12-19	01:45:00	2013-12-19 01:45:00	138.5	23.4405	15.85	132.323	23.3598	15.84	171.136	24.1236	15.88	146.745	24.2632	15.84	138.52	22.1126	15.89	139.13	24.797	15.93
2013-12-19	02:00:00	2013-12-19 02:00:00	135.8	23.4962	15.86	130.823	23.3542	15.84	172.036	24.2352	15.89	146.745	24.1599	15.84	137.92	22.562	15.88	138.63	24.7075	15.92
2013-12-19	02:15:00	2013-12-19 02:15:00	134.3	23.474	15.86	129.023	23.3208	15.84	168.636	24.2911	15.9	144.945	23.9255	15.84	135.82	22.1514	15.89	138.93	24.5593	15.9
2013-12-19	02:30:00	2013-12-19 02:30:00	131.6	23.4545	15.87	126.023	22.9953	15.81	165.636	24.3888	15.91	141.745	23.396	15.8	132.42	22.3039	15.89	133.63	24.2995	15.88
2013-12-19	02:45:00	2013-12-19 02:45:00	127.2	23.4322	15.87	121.923	22.3982	15.76	163.336	24.4307	15.92	136.245	22.7925	15.72	130.12	22.0627	15.9	131.93	23.2095	15.8
2013-12-19	03:00:00	2013-12-19 03:00:00	123.5	23.4099	15.89	116.823	22.6119	15.76	158.636	24.4615	15.92	132.545	23.2457	15.75	125.32	22.3483	15.91	126.33	22.6952	15.76
2013-12-19	03:15:00	2013-12-19 03:15:00	119.1	23.2763	15.89	113.023	22.6841	15.82	153.236	24.3553	15.92	126.445	24.3832	15.84	118.92	22.6786	15.92	120.83	22.6092	15.76
2013-12-19	03:30:00	2013-12-19 03:30:00	114.8	23.1372	15.9	107.423	22.623	15.82	148.736	24.1291	15.92	122.445	24.5062	15.88	115.12	22.3622	15.92	116.53	22.6925	15.72
2013-12-19	03:45:00	2013-12-19 03:45:00	108.1	23.0065	15.9	101.623	22.5675	15.83	143.736	24.0845	15.92	117.945	24.5789	15.89	110.02	22.3344	15.9	111.43	23.4545	15.82
2013-12-19	04:00:00	2013-12-19 04:00:00	102	22.7841	15.88	96.6231	22.3732	15.83	138.336	24.0426	15.9	113.245	24.481	15.89	105.42	22.6897	15.91	105.83	23.6634	15.82
2013-12-19	04:15:00	2013-12-19 04:15:00	96.8	22.0018	15.79	91.7231	22.071	15.76	132.836	23.9757	15.86	107.045	24.4252	15.88	99.92	22.537	15.9	100.23	22.937	15.64
2013-12-19	04:30:00	2013-12-19 04:30:00	92.2	21.2631	15.71	87.0231	19.2706	15.6	128.236	23.6941	15.75	101.445	24.2241	15.87	94.32	21.9159	15.77	94.53	20.0338	14.93
2013-12-19	04:45:00	2013-12-19 04:45:00	85.7	20.0338	15.7	80.2231	18.4908	15.6	122.536	22.2235	15.53	95.2455	24.1933	15.88	88.22	19.8579	15.5	89.53	19.1692	14.81
2013-12-19	05:00:00	2013-12-19 05:00:00	81.1	17.1535	15.7	74.9231	19.2597	15.62	117.036	16.4108	15.2	90.4455	23.9813	15.86	85.32	20.3832	15.53	83.53	16.0837	14.56
2013-12-19	05:15:00	2013-12-19 05:15:00	75.5	13.1224	15.85	69.2231	17.0503	15.73	111.736	15.9082	15.23	84.5455	23.2707	15.8	78.52	19.1528	15.62	77.93	16.4676	15.19
2013-12-19	05:30:00	2013-12-19 05:30:00	70.1	11.1633	15.95	63.7231	15.9325	15.79	105.736	15.6978	15.27	78.7455	22.6813	15.76	73.32	17.0856	15.51	72.43	16.6842	15.13
2013-12-19	05:45:00	2013-12-19 05:45:00	64.9	10.1937	15.98	58.1231	14.3064	15.83	101.236	15.5415	15.24	73.2455	20.532	15.56	68.72	16.4135	15.28	66.83	16.5759	14.93
2013-12-19	06:00:00	2013-12-19 06:00:00	60.9	9.51606	16.03	52.7231	11.2236	15.9	96.2364	14.9766	15.2	68.0455	18.3542	15.1	63.82	14.7002	15.16	61.33	16.1593	14.8
2013-12-19	06:15:00	2013-12-19 06:15:00	55.8	8.62627	16.1	48.2231	10.0688	15.85	92.3364	14.4536	15.18	63.2455	17.4333	15.11	59.72	13.9215	15.22	56.73	15.5415	15.04
2013-12-19	06:30:00	2013-12-19 06:30:00	51.1	7.84065	16.16	42.7231	8.71107	15.85	87.3364	13.8628	15.11	57.8455	17.3056	15.13	54.62	13.0985	15.22	51.03	15.3907	14.97
2013-12-19	06:45:00	2013-12-19 06:45:00	47.5	7.1119	16.17	38.5231	8.08821	15.95	83.4364	13.5268	15.02	53.6455	17.0123	15.02	51.32	12.1872	15.19	47.13	15.1566	14.92
2013-12-19	07:00:00	2013-12-19 07:00:00	43.7	5.9566	16.2	34.7231	6.42927	15.97	79.6364	13.4363	14.96	49.5455	16.162	14.6	47.72	11.347	15.1	42.53	14.727	14.81
2013-12-19	07:15:00	2013-12-19 07:15:00	40.5	4.9517	16.27	31.0231	5.11402	16.09	76.3364	13.4097	14.89	45.3455	15.5792	14.55	43.72	11.0899	14.97	39.03	13.8681	14.76
2013-12-19	07:30:00	2013-12-19 07:30:00	37.5	4.28982	16.33	27.6231	4.12982	16.15	72.6364	13.3777	14.83	42.5455	14.8102	14.56	40.92	11.0584	14.9	35.13	13.1942	14.74
2013-12-19	07:45:00	2013-12-19 07:45:00	35	3.77048	16.38	24.9231	3.4401	16.19	69.9364	11.2761	14.89	39.4455	13.7187	14.52	38.02	10.7364	14.79	32.93	12.5283	14.7
2013-12-19	08:00:00	2013-12-19 08:00:00	32.5	3.05317	16.4	22.7231	2.89994	16.2	67.3364	9.93624	15.05	37.5455	13.0241	14.6	35.62	10.6005	14.68	30.53	12.1687	14.62
2013-12-19	08:15:00	2013-12-19 08:15:00	30.7	2.19939	16.44	20.4231	2.32158	16.19	65.2364	8.31846	15.2	34.8455	12.285	14.79	33.22	10.1885	14.53	28.03	11.9734	14.52
2013-12-19	08:30:00	2013-12-19 08:30:00	28.7	1.35883	16.48	18.7231	1.68931	16.21	62.6364	7.27898	15.34	33.3455	11.242	15.02	31.12	10.0688	14.43	26.63	11.8073	14.45
2013-12-19	08:45:00	2013-12-19 08:45:00	27.5	0.952777	16.53	17.8231	1.22221	16.26	61.5364	5.67791	15.55	32.4455	10.3422	15.23	28.92	10.0974	14.41	25.83	11.7046	14.38
2013-12-19	09:00:00	2013-12-19 09:00:00	26.1	0.729317	16.62	16.8231	0.965685	16.31	59.9364	4.58196	15.7	32.0455	9.529	15.23	28.92	10.2823	14.4	25.43	11.5625	14.32
2013-12-19	09:15:00	2013-12-19 09:15:00	26.4	0.566771	16.71	19.1231	0.790546	16.37	60.0364	3.43295	15.87	33.5455	8.27749	15.45	27.92	10.0974	14.41	27.13	11.3995	14.3
2013-12-19	09:30:00	2013-12-19 09:30:00	27.5	0.472593	16.82	21.2231	0.72511	16.44	60.0364	2.74971	15.97	36.0455	8.21095	15.47	28.52	10.1104	14.43	29.23	11.3417	14.32
2013-12-19	09:45:00	2013-12-19 09:45:00	29.3	0.420008	16.92	23.7231	0.672682	16.52	62.0364	1.90431	16.12	38.7455	9.17737	15.43	28.72	8.93238	14.68	32.23	11.3654	14.37
2013-12-19	10:00:00	2013-12-19 10:00:00	34.6	0.39391	17	29.6231	0.727213	16.53	65.2364	1.63758	16.22	45.3455	20.0586	15.82	33.22	7.00575	15.13	38.43	18.652	15.35
2013-12-19	10:15:00	2013-12-19 10:15:00	40.2	0.379914	17.08	36.4231	0.77573	16.41	69.9364	6.16382	16.14	51.5455	23.3514	16.03	37.02	10.2094	15.04	44.23	23.3793	15.85
2013-12-19	10:30:00	2013-12-19 10:30:00	45.9	0.51337	17.03	43.3231	1.44979	16.22	76.7364	13.8521	16.02	59.1455	24.5649	16.11	43.92	14.939	15.31	51.63	24.3218	16.08
2013-12-19	10:45:00	2013-12-19 10:45:00	53.4	0.839382	16.9	50.9231	2.33082	16.38	84.5364	18.3214	16.17	66.0455	24.2715	16.15	51.32	17.572	15.59	59.33	24.4084	16.09
2013-12-19	11:00:00	2013-12-19 11:00:00	61.5	1.56806	16.78	58.8231	15.1378	16.39	92.8364	19.2871	16.22	74.1455	24.4866	16.17	61.32	17.1806	15.7	67.03	24.3022	16.05
2013-12-19	11:15:00	2013-12-19 11:15:00	69.2	5.54889	16.88	65.5231	17.8116	16.27	102.236	19.4379	16.24	82.5455	22.3677	16.14	70.12	17.5584	15.73	75.23	24.0538	15.99
2013-12-19	11:30:00	2013-12-19 11:30:00	77.8	9.00453	16.67	74.9231	17.9205	16.23	111.036	19.1829	16.29	90.4455	20.7387	16.08	80.02	16.5596	15.36	83.73	23.5937	15.89
2013-12-19	11:45:00	2013-12-19 11:45:00	86.3	11.9127	16.4	81.7231	18.3761	16.16	120.236	18.6001	16.32	97.6455	20.6009	16.04	89.42	17.2458	15.33	91.43	23.2401	15.83
2013-12-19	12:00:00	2013-12-19 12:00:00	94.9	14.6922	16.22	88.4231	18.4225	16.05	128.036	18.5099	16.33	106.745	20.5127	15.88	96.22	17.3953	15.33	99.13	23.2846	15.82
2013-12-19	12:15:00	2013-12-19 12:15:00	99.9	14.8773	16.17	98.9231	17.9968	15.93	134.636	17.504	16.34	112.345	20.8297	15.69	104.12	17.9914	15.41	105.63	23.1511	15.75
2013-12-19	12:30:00	2013-12-19 12:30:00	107.3	15.4849	16.1	105.923	17.738	15.86	141.936	17.186	16.1	119.745	21.6501	15.71	109.62	18.245	15.4	111.63	22.9453	15.65
2013-12-19	12:45:00	2013-12-19 12:45:00	114.4	16.6192	15.96	112.923	17.4252	15.78	147.836	17.5829	15.77	124.745	21.9297	15.72	115.72	18.458	15.56	117.43	22.748	15.65
2013-12-19	13:00:00	2013-12-19 13:00:00	117.6	17.3436	15.75	117.523	17.5938	15.69	154.336	18.2232	15.69	130.645	22.2013	15.72	120.52	18.4662	15.49	123.33	22.8897	15.67
2013-12-19	13:15:00	2013-12-19 13:15:00	123.4	17.4333	15.63	122.323	17.8252	15.58	158.936	18.827	15.61	133.845	22.0184	15.58	127.02	19.1501	15.47	127.23	22.8981	15.65
2013-12-19	13:30:00	2013-12-19 13:30:00	128	17.8415	15.59	125.223	18.3924	15.52	162.436	19.5778	15.51	137.645	22.0904	15.56	130.12	19.3721	15.46	130.83	22.8591	15.61
2013-12-19	13:45:00	2013-12-19 13:45:00	131.3	18.3761	15.57	127.123	18.7258	15.5	166.936	19.8442	15.49	139.945	22.462	15.54	133.72	19.5312	15.44	135.13	22.8175	15.6
2013-12-19	14:00:00	2013-12-19 14:00:00	131.3	18.7723	15.56	128.423	19.1939	15.48	167.836	19.9486	15.55	142.345	22.0655	15.47	134.52	19.803	15.43	134.03	22.7813	15.56
2013-12-19	14:15:00	2013-12-19 14:15:00	134.2	18.9529	15.54	132.223	19.3145	15.46	169.836	19.9431	15.61	144.245	21.8633	15.41	137.12	20.0723	15.44	136.83	22.6702	15.49
2013-12-19	14:30:00	2013-12-19 14:30:00	134.3	19.0241	15.52	132.123	19.4187	15.44	169.336	19.9156	15.67	145.845	21.5755	15.38	137.32	20.2814	15.46	138.53	22.3927	15.38
2013-12-19	14:45:00	2013-12-19 14:45:00	134.7	19.0104	15.53	133.423	19.4818	15.45	169.336	19.8909	15.49	142.745	21.2299	15.3	137.52	20.4576	15.47	137.23	22.0572	15.29
2013-12-19	15:00:00	2013-12-19 15:00:00	133	19.3474	15.52	133.023	19.4681	15.43	168.836	19.9101	15.36	144.145	21.1305	15.26	135.22	20.5209	15.49	137.03	21.6584	15.22
2013-12-19	15:15:00	2013-12-19 15:15:00	136.3	19.9376	15.66	129.123	19.4626	15.4	166.536	20.0696	15.48	143.545	20.7663	15.18	135.22	20.5209	15.49	136.13	21.1968	15.2
2013-12-19	15:30:00	2013-12-19 15:30:00	131.5	20.1163	15.71	129.423	19.4489	15.43	168.036	20.4025	15.59	143.245	20.6284	15.2	132.52	20.4851	15.48	134.33	20.6505	15.2
2013-12-19	15:45:00	2013-12-19 15:45:00	129.7	20.1961	15.72	129.023	19.4406	15.44	164.236	20.8186	15.64	139.545	20.4851	15.27	133.92	20.4576	15.46	134.53	20.2319	15.23
2013-12-19	16:00:00	2013-12-19 16:00:00	130.4	20.2071	15.73	127.023	19.1829	15.4	164.736	21.2327	15.68	139.045	20.7745	15.31	131.62	20.4135	15.45	131.23	19.9733	15.25
2013-12-19	16:15:00	2013-12-19 16:15:00	124.5	20.0448	15.7	123.523	19.1775	15.48	160.536	21.2769	15.7	134.345	20.3392	15.53	128.22	20.4411	15.46	127.83	19.8332	15.15
2013-12-19	16:30:00	2013-12-19 16:30:00	122.5	19.9898	15.71	119.623	19.2432	15.61	156.536	21.4482	15.69	131.845	19.9211	15.83	124.02	20.2291	15.46	125.53	19.9239	15.32
2013-12-19	16:45:00	2013-12-19 16:45:00	118	19.5943	15.7	117.223	19.4297	15.72	154.436	21.2962	15.71	128.645	20.1741	15.84	120.12	20.1548	15.49	122.03	20.0778	15.49
2013-12-19	17:00:00	2013-12-19 17:00:00	115.8	19.4379	15.71	113.423	19.4297	15.73	151.436	21.3045	15.71	128.545	20.5898	15.72	119.22	20.1356	15.51	121.33	20.1741	15.49
2013-12-19	17:15:00	2013-12-19 17:15:00	111.7	19.3309	15.74	109.423	19.2569	15.8	147.036	21.3985	15.71	121.745	20.6312	15.71	115.32	20.0421	15.51	115.13	20.3282	15.5
2013-12-19	17:30:00	2013-12-19 17:30:00	108.1	19.1829	15.79	107.223	19.2076	16	146.136	21.2824	15.72	118.445	20.2429	15.77	111.12	19.5586	15.55	112.83	20.3612	15.55
2013-12-19	17:45:00	2013-12-19 17:45:00	105.1	18.8516	15.94	103.323	18.9474	16.09	141.136	20.3722	15.75	114.745	20.9456	15.75	106.62	18.7395	15.58	108.23	20.2236	15.67
2013-12-19	18:00:00	2013-12-19 18:00:00	99.2	18.6438	16.09	98.7231	18.7778	16.3	135.636	20.1411	15.76	109.945	20.678	15.8	103.92	19.8057	15.58	104.13	19.6217	16.2
2013-12-19	18:15:00	2013-12-19 18:15:00	96.3	18.2259	16.23	95.9231	17.8878	16.47	131.736	18.1359	16.14	106.145	20.9235	15.78	98.72	19.5366	15.6	100.53	19.298	16.3
2013-12-19	18:30:00	2013-12-19 18:30:00	92.2	17.4197	16.46	90.6231	17.8524	16.52	127.136	14.3599	16.93	101.145	20.9124	15.83	94.92	19.1418	15.68	96.23	19.4927	16.04
2013-12-19	18:45:00	2013-12-19 18:45:00	87.7	16.733	16.62	85.2231	17.2512	16.53	123.136	13.0666	17.12	99.0455	20.8462	15.89	90.72	18.9611	15.75	91.23	19.5229	16.07
2013-12-19	19:00:00	2013-12-19 19:00:00	85.4	15.9648	16.76	83.5231	16.7303	16.6	120.336	12.8702	17.12	95.8455	20.375	15.96	88.42	18.9638	15.81	88.03	19.3803	16.18
2013-12-19	19:15:00	2013-12-19 19:15:00	82.1	14.2369	16.94	81.5231	17.5339	16.32	118.436	13.5988	17.02	92.1455	19.8854	16.1	86.72	18.8763	15.93	85.93	19.0597	16.27
2013-12-19	19:30:00	2013-12-19 19:30:00	80.4	13.9135	16.97	79.1231	17.349	16.35	116.036	14.2155	16.94	91.6455	19.6135	16.21	83.82	18.6684	15.98	84.23	18.7668	16.25
2013-12-19	19:45:00	2013-12-19 19:45:00	79.1	13.7961	16.97	76.3231	17.504	16.35	113.636	12.013	17.01	88.9455	20.1246	16.17	81.92	18.7477	16.07	82.43	18.6821	16.29
2013-12-19	20:00:00	2013-12-19 20:00:00	79.1	13.3724	16.96	76.9231	17.1996	16.43	112.436	10.8908	17	88.2455	19.5504	16.17	79.82	17.0394	16.39	82.03	18.4853	16.39
2013-12-19	20:15:00	2013-12-19 20:15:00	77.6	12.3299	16.99	76.8231	17.2132	16.45	112.436	9.80381	16.94	88.6455	19.9293	16.11	79.82	15.275	16.7	79.63	18.931	16.14
2013-12-19	20:30:00	2013-12-19 20:30:00	75.8	13.2766	16.96	75.1231	17.9124	16.34	111.136	8.6905	16.78	87.3455	20.2484	15.99	78.32	12.3061	16.95	80.13	19.6629	15.91
2013-12-19	20:45:00	2013-12-19 20:45:00	74.1	14.8558	16.83	71.6231	17.6428	16.38	109.436	9.56267	16.87	84.1455	20.3805	15.89	76.42	10.9877	16.99	78.73	19.9981	15.79
2013-12-19	21:00:00	2013-12-19 21:00:00	77.3	16.1107	16.7	74.5231	18.5673	16.1	110.736	8.055	16.73	86.0455	20.2704	15.86	78.52	9.79602	16.85	79.83	20.0476	15.78
2013-12-19	21:15:00	2013-12-19 21:15:00	79.6	17.0449	16.56	77.5231	18.4607	16.13	113.136	17.7734	16.57	89.3455	20.4603	15.81	80.82	16.1215	16.64	82.03	20.2126	15.72
2013-12-19	21:30:00	2013-12-19 21:30:00	83.2	17.5965	16.52	80.4231	18.7258	16.09	115.136	19.0268	16.39	92.6455	20.7663	15.77	82.52	17.129	16.31	84.13	20.2539	15.75
2013-12-19	21:45:00	2013-12-19 21:45:00	84.8	17.817	16.46	82.8231	18.9228	16.13	119.436	18.9064	16.31	95.1455	21.0145	15.77	85.92	18.3897	16.05	90.43	20.2924	15.79
2013-12-19	22:00:00	2013-12-19 22:00:00	89.1	17.2757	16.52	87.9231	19.2158	16.09	123.636	18.9857	16.29	99.7455	20.8904	15.78	92.22	19.2158	15.98	93.83	20.4411	15.81
2013-12-19	22:15:00	2013-12-19 22:15:00	94	17.7026	16.33	92.9231	19.3967	16.04	129.936	18.8051	16.26	105.045	20.8352	15.75	98.92	19.5998	15.99	98.43	20.7028	15.72
2013-12-19	22:30:00	2013-12-19 22:30:00	100.6	19.098	15.97	97.8231	19.246	15.95	135.736	18.8982	16.18	110.645	20.8904	15.68	102.92	19.1994	15.96	103.73	21.1139	15.67
2013-12-19	22:45:00	2013-12-19 22:45:00	106.5	19.4132	15.82	103.323	19.2651	15.81	139.336	18.1168	15.69	116.545	21.3294	15.65	106.62	19.6464	15.84	109.33	21.5063	15.69
2013-12-19	23:00:00	2013-12-19 23:00:00	110.6	19.5257	15.66	108.423	19.2871	15.57	145.236	18.9556	15.5	120.645	21.4731	15.62	112.32	19.8716	15.74	116.03	21.8328	15.63
2013-12-19	23:15:00	2013-12-19 23:15:00	116	19.5723	15.52	116.023	19.4214	15.42	150.836	19.4351	15.4	126.045	21.963	15.63	118.82	19.9101	15.59	119.63	21.963	15.54
2013-12-19	23:30:00	2013-12-19 23:30:00	119.7	19.7727	15.39	120.223	19.6217	15.31	155.636	20.1988	15.48	130.645	22.4537	15.65	124.12	20.0338	15.44	124.73	22.0655	15.49
2013-12-19	23:45:00	2013-12-19 23:45:00	128.6	19.9376	15.27	127.023	19.7865	15.22	163.136	20.3062	15.49	136.945	22.5869	15.67	129.12	20.4686	15.4	131.13	22.2096	15.44
2013-12-20	00:00:00	2013-12-20	132.3	20.1631	15.13	132.623	20.0146	15.08	167.336	21.927	15.5	142.545	22.698	15.67	133.52	20.8517	15.42	135.23	22.3011	15.4
2013-12-20	00:15:00	2013-12-20 00:15:00	135.2	20.2098	15.08	131.723	20.1438	15.04	171.536	21.9935	15.48	146.545	22.7341	15.65	140.72	20.7304	15.41	139.83	22.3205	15.38
2013-12-20	00:30:00	2013-12-20 00:30:00	138.8	20.2181	15.06	139.623	20.2264	15.02	175.236	22.1431	15.47	152.345	22.6064	15.56	142.92	21.3349	15.39	142.53	22.3039	15.32
2013-12-20	00:45:00	2013-12-20 00:45:00	143.7	20.2484	15.06	139.723	20.3227	15.04	177.736	22.2263	15.45	155.045	22.5397	15.44	146.52	21.3073	15.36	148.03	22.2789	15.29
2013-12-20	01:00:00	2013-12-20 01:00:00	143.1	20.4053	15.07	144.523	20.4741	15.07	181.536	22.2845	15.4	155.145	22.5037	15.31	148.62	21.3073	15.32	147.63	22.254	15.27
2013-12-20	01:15:00	2013-12-20 01:15:00	146.6	20.5898	15.1	148.323	20.6312	15.11	185.036	22.3039	15.33	159.345	22.5564	15.29	152.02	21.6031	15.31	152.23	22.2734	15.25
2013-12-20	01:30:00	2013-12-20 01:30:00	147.2	20.7083	15.14	148.023	20.8462	15.15	182.136	22.3566	15.29	161.245	22.6008	15.28	152.42	21.3736	15.3	153.83	22.3039	15.26
2013-12-20	01:45:00	2013-12-20 01:45:00	150.1	20.8793	15.18	149.823	20.9925	15.18	183.136	22.4426	15.29	159.845	22.6175	15.29	151.12	20.8876	15.29	151.93	22.29	15.27
2013-12-20	02:00:00	2013-12-20 02:00:00	146.8	20.9621	15.19	147.223	21.0725	15.21	182.336	22.4842	15.29	158.445	22.3871	15.31	149.92	21.404	15.29	154.23	22.3122	15.28
2013-12-20	02:15:00	2013-12-20 02:15:00	146.3	21.0063	15.21	145.923	21.2272	15.24	182.536	22.4926	15.31	158.645	22.6675	15.32	149.72	21.0918	15.3	150.93	22.3233	15.28
2013-12-20	02:30:00	2013-12-20 02:30:00	147.2	21.0753	15.23	144.923	21.2603	15.26	181.536	22.426	15.32	156.145	22.6536	15.32	148.02	21.4648	15.3	149.83	22.3233	15.29
2013-12-20	02:45:00	2013-12-20 02:45:00	144.7	21.0974	15.23	139.823	21.2244	15.26	177.536	22.4232	15.32	154.945	22.7313	15.33	147.12	20.8573	15.3	148.03	22.3233	15.29
2013-12-20	03:00:00	2013-12-20 03:00:00	141.8	21.1305	15.24	139.223	21.1995	15.26	179.036	22.4232	15.33	151.445	22.7536	15.33	145.12	21.5118	15.31	144.83	22.34	15.31
2013-12-20	03:15:00	2013-12-20 03:15:00	137.5	21.1333	15.25	135.023	21.1526	15.26	173.136	22.4093	15.33	149.745	22.6758	15.34	141.92	21.3874	15.32	141.53	22.3067	15.31
2013-12-20	03:30:00	2013-12-20 03:30:00	133.3	21.1471	15.25	130.523	21.1802	15.25	166.436	22.4121	15.34	141.945	22.6508	15.36	135.22	21.3128	15.34	135.43	22.2484	15.31
2013-12-20	03:45:00	2013-12-20 03:45:00	128.9	21.136	15.25	125.223	20.678	15.25	162.936	22.3705	15.35	138.445	22.2762	15.36	130.62	21.3543	15.35	131.23	22.0821	15.3
2013-12-20	04:00:00	2013-12-20 04:00:00	125.9	20.9566	15.26	124.623	20.7387	15.25	159.736	22.2651	15.37	132.945	22.4343	15.36	128.52	21.3045	15.36	126.43	21.927	15.28
2013-12-20	04:15:00	2013-12-20 04:15:00	120.7	20.7911	15.27	118.023	20.8517	15.25	155.936	22.193	15.39	128.545	22.4093	15.37	122.82	21.125	15.36	122.73	21.7138	15.27
2013-12-20	04:30:00	2013-12-20 04:30:00	114.7	20.4383	15.26	110.623	20.6174	15.25	151.036	21.9824	15.42	124.745	22.3455	15.37	117.82	21.2051	15.38	117.73	20.918	15.25
2013-12-20	04:45:00	2013-12-20 04:45:00	110.1	19.4982	15.3	107.423	19.1884	15.26	144.736	21.7747	15.44	117.945	22.071	15.4	111.42	20.9814	15.39	113.33	19.9266	15.29
2013-12-20	05:00:00	2013-12-20 05:00:00	101.8	18.2177	15.39	99.7231	18.3597	15.33	138.536	21.4676	15.47	111.245	22.0461	15.46	104.62	20.3282	15.41	104.93	18.5891	15.14
2013-12-20	05:15:00	2013-12-20 05:15:00	95.5	16.5055	15.51	93.9231	16.4297	15.45	132.236	20.4989	15.54	104.745	21.6474	15.49	98.52	19.2734	15.52	98.83	18.0186	15.52
2013-12-20	05:30:00	2013-12-20 05:30:00	89.1	15.2239	15.62	87.0231	15.5603	15.55	126.236	19.5037	15.59	98.7455	20.3832	15.55	93.42	19.2268	15.58	92.63	18.1686	15.4
2013-12-20	05:45:00	2013-12-20 05:45:00	83.5	13.399	15.82	80.5231	15.2561	15.61	120.236	18.3815	15.63	92.4455	20.2374	15.54	87.12	19.0816	15.6	86.33	17.7762	15.31
2013-12-20	06:00:00	2013-12-20 06:00:00	77.3	12.211	15.96	75.2231	13.4736	15.81	114.636	17.8442	15.67	86.1455	19.4159	15.54	81.52	17.4442	15.63	79.43	17.5965	15.45
2013-12-20	06:15:00	2013-12-20 06:15:00	71.7	11.1502	16.07	66.8231	12.2532	15.92	108.336	17.3518	15.64	79.3455	19.246	15.54	75.22	16.8441	15.71	72.83	17.2784	15.59
2013-12-20	06:30:00	2013-12-20 06:30:00	65.4	10.1703	16.17	62.1231	10.985	16.05	102.336	17.1725	15.64	72.7455	18.9365	15.53	69.72	16.5894	15.8	65.63	17.1154	15.76
2013-12-20	06:45:00	2013-12-20 06:45:00	60.4	8.99422	16.24	55.1231	10.7181	16.07	96.5364	16.9852	15.62	66.5455	18.6575	15.49	64.52	16.1485	15.78	59.33	16.8523	15.71
2013-12-20	07:00:00	2013-12-20 07:00:00	54.5	7.84829	16.3	49.5231	9.63263	16.14	91.3364	16.5624	15.6	60.4455	18.3597	15.49	58.62	15.0411	15.75	54.23	16.5082	15.68
2013-12-20	07:15:00	2013-12-20 07:15:00	50.7	6.74093	16.37	44.8231	7.88399	16.2	86.9364	15.9109	15.63	55.8455	18.0677	15.5	54.82	13.9482	15.73	49.33	16.3053	15.67
2013-12-20	07:30:00	2013-12-20 07:30:00	46.4	5.78229	16.45	39.7231	5.97156	16.31	82.1364	14.8102	15.61	51.0455	17.6537	15.51	50.42	13.0481	15.7	44.73	16.189	15.65
2013-12-20	07:45:00	2013-12-20 07:45:00	42.7	5.04265	16.51	35.3231	4.85108	16.39	78.1364	13.5002	15.58	46.8455	16.6111	15.51	46.02	12.3325	15.66	39.73	15.6627	15.58
2013-12-20	08:00:00	2013-12-20 08:00:00	39.5	4.04276	16.56	31.7231	3.99687	16.44	74.6364	11.9892	15.62	43.0455	14.2395	15.57	43.32	11.7573	15.61	35.93	15.0518	15.52
2013-12-20	08:15:00	2013-12-20 08:15:00	36.4	3.15962	16.6	27.9231	3.15962	16.53	72.3364	10.3083	15.72	39.4455	13.0056	15.63	39.52	11.3496	15.54	32.83	14.4322	15.51
2013-12-20	08:30:00	2013-12-20 08:30:00	33.5	2.40488	16.65	25.2231	2.54655	16.58	68.6364	8.84998	15.81	36.6455	11.0165	15.72	36.12	11.4547	15.51	29.63	13.8148	15.5
2013-12-20	08:45:00	2013-12-20 08:45:00	30.9	1.83392	16.71	22.9231	1.90658	16.64	65.2364	7.75147	15.91	33.9455	9.90507	15.79	32.32	11.3575	15.52	27.13	13.2766	15.5
2013-12-20	09:00:00	2013-12-20 09:00:00	28.6	1.37432	16.79	20.5231	1.44979	16.72	62.8364	5.91174	16.04	32.2455	8.11888	15.91	31.12	11.831	15.54	25.13	12.8967	15.51
2013-12-20	09:15:00	2013-12-20 09:15:00	26.9	1.00665	16.9	20.4231	1.10857	16.82	61.0364	4.81186	16.18	31.8455	7.51492	16	28.52	11.3129	15.59	24.63	12.6846	15.54
2013-12-20	09:30:00	2013-12-20 09:30:00	25.8	0.739845	17.03	19.9231	0.856423	16.94	59.5364	3.97032	16.33	31.7455	6.76612	16.11	28.12	11.4547	15.65	24.63	12.5548	15.59
2013-12-20	09:45:00	2013-12-20 09:45:00	26.2	0.585353	17.15	22.4231	0.723007	17.06	59.1364	3.33529	16.48	34.8455	5.78727	16.25	27.52	11.2892	15.75	27.33	12.4886	15.67
2013-12-20	10:00:00	2013-12-20 10:00:00	28.2	0.501108	17.26	25.4231	0.699905	17.18	60.6364	2.82709	16.64	36.6455	5.64812	16.29	28.12	7.57337	16.06	30.33	12.4119	15.78
2013-12-20	10:15:00	2013-12-20 10:15:00	29.8	0.442194	17.38	27.4231	0.676864	17.3	62.2364	2.10982	16.85	40.5455	7.53525	16.22	28.92	5.81464	16.34	33.43	12.2638	15.95
2013-12-20	10:30:00	2013-12-20 10:30:00	36.4	0.411963	17.49	34.8231	0.676864	17.44	67.3364	1.76828	16.99	46.8455	10.4283	16.02	35.52	9.54713	16.31	39.83	11.9813	16.02
2013-12-20	10:45:00	2013-12-20 10:45:00	42	0.395912	17.63	42.7231	0.76305	17.64	72.3364	2.93289	17.04	54.5455	13.5988	15.99	40.12	10.9222	16.48	47.13	11.9866	15.99
2013-12-20	11:00:00	2013-12-20 11:00:00	48.8	0.446238	17.8	48.6231	1.14344	17.61	78.7364	8.15468	16.56	61.5455	14.8075	15.88	46.42	10.9274	16.55	55.03	12.7456	15.99
2013-12-20	11:15:00	2013-12-20 11:15:00	56.1	0.727213	18.11	57.1231	1.08247	17.67	86.9364	9.64559	16.46	68.3455	16.5678	15.85	55.02	10.3683	16.5	59.43	15.0438	15.77
2013-12-20	11:30:00	2013-12-20 11:30:00	65.1	1.07813	18.31	64.3231	3.24261	17.69	96.2364	11.3759	16.42	77.1455	16.8794	15.92	64.22	12.4357	16.67	70.93	16.9119	15.97
2013-12-20	11:45:00	2013-12-20 11:45:00	73.5	4.56487	17.8	72.0231	7.45144	17.36	104.836	12.0367	16.41	83.4455	17.1779	16.15	69.52	18.1032	16.25	78.63	18.4389	16.07
2013-12-20	12:00:00	2013-12-20 12:00:00	80.9	9.92585	17.33	81.2231	10.6554	17.16	113.136	12.4913	16.44	92.4455	17.8197	16.18	83.12	19.4022	16.19	84.83	19.5723	16.09
2013-12-20	12:15:00	2013-12-20 12:15:00	90.8	11.9286	17.14	85.7231	12.788	16.97	122.736	13.1198	16.51	99.5455	18.9392	16.19	91.32	19.8057	16.21	93.63	20.2896	16.14
2013-12-20	12:30:00	2013-12-20 12:30:00	94.3	12.3987	17.13	93.4231	13.6921	16.91	128.436	16.0378	16.64	106.045	19.4598	16.23	97.22	19.5394	16.27	101.83	20.5953	16.22
2013-12-20	12:45:00	2013-12-20 12:45:00	103.1	12.7402	17.11	101.323	14.015	16.89	135.236	18.346	16.64	111.945	19.6272	16.29	104.12	20.1328	16.35	107.03	20.7607	16.24
2013-12-20	13:00:00	2013-12-20 13:00:00	108.4	13.2367	17.05	104.223	14.1486	16.82	143.036	18.8681	16.65	119.745	19.5449	16.39	110.62	20.1906	16.36	110.13	20.8959	16.26
2013-12-20	13:15:00	2013-12-20 13:15:00	116.1	14.0577	16.98	110.623	14.5233	16.74	146.536	19.3748	16.61	124.045	20.0393	16.31	114.82	20.1466	16.37	119.13	21.0394	16.25
2013-12-20	13:30:00	2013-12-20 13:30:00	118.8	15.4553	16.89	113.923	16.9933	16.41	154.236	19.8744	16.61	126.245	20.2704	16.35	121.12	20.6918	16.37	123.13	21.0753	16.34
2013-12-20	13:45:00	2013-12-20 13:45:00	126.7	16.649	16.53	119.723	17.9587	16.22	159.336	19.8332	16.7	133.645	20.2484	16.38	125.12	20.3475	16.44	130.23	21.1001	16.49
2013-12-20	14:00:00	2013-12-20 14:00:00	121.2	17.2186	16.47	126.623	18.7969	16.19	163.336	19.5613	16.72	142.545	20.3254	16.23	130.62	20.0916	16.64	131.63	21.0118	16.48
2013-12-20	14:15:00	2013-12-20 14:15:00	129.1	17.9233	16.42	129.223	19.0734	16.14	164.136	19.4763	16.65	138.845	20.4906	16.1	133.92	19.8661	16.65	132.63	20.9538	16.47
2013-12-20	14:30:00	2013-12-20 14:30:00	133.8	18.1223	16.37	131.423	19.4242	16.08	168.636	19.4845	16.73	143.145	20.4438	16.14	135.92	19.7096	16.64	136.23	20.9152	16.47
2013-12-20	14:45:00	2013-12-20 14:45:00	133.6	18.3569	16.28	131.823	19.5037	16.07	169.036	19.3063	16.85	144.845	20.419	16.2	134.82	19.6107	16.6	138.43	20.849	16.45
2013-12-20	15:00:00	2013-12-20 15:00:00	136.4	18.7942	16.2	136.723	19.5284	16.06	170.036	19.3392	16.76	146.945	20.4493	16.2	137.22	19.8387	16.56	138.43	20.7883	16.43
2013-12-20	15:15:00	2013-12-20 15:15:00	140.6	19.0761	16.14	137.823	19.5147	16.07	172.636	19.6958	16.61	147.345	20.7993	16.11	142.32	19.6437	16.58	142.33	20.7938	16.3
2013-12-20	15:30:00	2013-12-20 15:30:00	137.5	19.2049	16.1	137.523	19.5833	16.06	172.436	20.3227	16.34	148.445	21.0063	16.07	140.62	19.7041	16.56	141.33	20.7856	16.26
2013-12-20	15:45:00	2013-12-20 15:45:00	138.2	19.3145	16.08	132.623	19.6656	16.04	171.736	20.6036	16.19	148.845	21.1747	16.05	138.82	19.7947	16.51	140.83	20.8407	16.22
2013-12-20	16:00:00	2013-12-20 16:00:00	136.9	19.3666	16.07	134.523	19.6958	16.04	172.436	20.3998	16.17	148.045	21.252	16.05	139.62	19.8414	16.48	141.83	20.9373	16.37
2013-12-20	16:15:00	2013-12-20 16:15:00	138.1	19.383	16.07	134.223	19.7096	16.03	170.736	20.3667	16.22	146.045	21.2741	16.06	137.12	19.9486	16.43	140.53	20.9649	16.42
2013-12-20	16:30:00	2013-12-20 16:30:00	132.9	19.4598	16.07	131.223	19.7178	16.03	167.636	20.4686	16.17	145.845	21.2548	16.07	135.82	20.0833	16.38	137.13	21.0311	16.39
2013-12-20	16:45:00	2013-12-20 16:45:00	132.9	19.4982	16.06	129.023	19.6354	16.05	165.836	20.6091	16.14	142.645	21.125	16.08	132.02	20.1988	16.34	136.63	21.0725	16.31
2013-12-20	17:00:00	2013-12-20 17:00:00	128.2	19.5476	16.05	125.323	19.6272	16.07	163.636	20.6339	16.15	136.845	21.1056	16.09	128.32	20.1713	16.31	130.23	21.0615	16.28
2013-12-20	17:15:00	2013-12-20 17:15:00	122	19.5147	16.06	120.423	19.5915	16.1	162.936	20.6091	16.17	132.545	20.7028	16.19	127.02	20.1713	16.33	129.33	21.0201	16.32
2013-12-20	17:30:00	2013-12-20 17:30:00	118.5	19.4763	16.09	115.823	19.5174	16.12	157.336	20.4989	16.25	130.245	20.4383	16.32	124.42	20.1108	16.42	124.43	20.8628	16.41
2013-12-20	17:45:00	2013-12-20 17:45:00	115.3	19.2679	16.16	114.823	19.3693	16.17	151.436	20.4301	16.32	127.545	20.9014	16.15	119.02	20.1906	16.53	120.93	20.6973	16.49
2013-12-20	18:00:00	2013-12-20 18:00:00	114.9	18.8681	16.29	111.923	19.5229	16.17	149.536	20.3667	16.39	123.545	21.0007	16.11	116.92	20.3227	16.55	118.13	20.5843	16.6
2013-12-20	18:15:00	2013-12-20 18:15:00	110.1	18.6602	16.4	107.423	19.4626	16.18	145.336	20.353	16.39	117.245	20.94	16.13	111.02	20.4025	16.57	112.13	20.4576	16.69
2013-12-20	18:30:00	2013-12-20 18:30:00	108	18.3788	16.58	102.123	19.3584	16.22	141.336	19.7755	16.67	114.945	20.769	16.2	108.02	20.4218	16.58	108.43	20.3419	16.72
2013-12-20	18:45:00	2013-12-20 18:45:00	101.1	18.1223	16.72	99.9231	19.2131	16.33	138.336	18.8079	16.99	111.445	20.7497	16.21	104.22	20.4383	16.59	104.63	20.3475	16.64
2013-12-20	19:00:00	2013-12-20 19:00:00	97.8	17.4306	16.89	94.5231	19.4489	16.35	133.936	15.1997	17.42	106.645	20.5926	16.32	102.42	20.4934	16.61	100.23	20.3419	16.65
2013-12-20	19:15:00	2013-12-20 19:15:00	94.3	15.8407	17.15	93.6231	19.4379	16.29	131.036	14.1058	17.47	106.045	20.3309	16.43	99.12	20.3502	16.62	98.13	20.3364	16.66
2013-12-20	19:30:00	2013-12-20 19:30:00	93.7	14.9122	17.27	90.5231	19.3474	16.27	128.236	13.3964	17.5	103.845	20.2731	16.42	97.02	20.4245	16.63	99.13	20.2841	16.69
2013-12-20	19:45:00	2013-12-20 19:45:00	90.6	14.7673	17.27	88.1231	18.9912	16.32	126.236	12.5416	17.56	100.845	19.9981	16.5	93.22	20.4383	16.65	95.33	20.375	16.69
2013-12-20	20:00:00	2013-12-20 20:00:00	89.1	15.5765	17.14	86.7231	18.8626	16.37	123.136	12.24	17.58	97.5455	19.7123	16.57	89.02	19.6025	16.73	90.63	20.2319	16.7
2013-12-20	20:15:00	2013-12-20 20:15:00	86.4	16.2647	17.01	84.1231	18.8462	16.41	121.536	9.59635	17.71	98.0455	20.0998	16.49	89.22	18.1604	16.92	90.23	20.0861	16.78
2013-12-20	20:30:00	2013-12-20 20:30:00	85.2	16.3459	16.99	83.9231	18.8571	16.41	121.536	8.11377	17.85	97.9455	20.6808	16.33	88.02	15.493	17.17	91.33	20.0641	16.79
2013-12-20	20:45:00	2013-12-20 20:45:00	84.1	16.8523	16.94	81.7231	18.92	16.41	119.336	6.97797	17.91	94.1455	21.1084	16.23	86.72	13.6921	17.4	87.13	20.1933	16.64
2013-12-20	21:00:00	2013-12-20 21:00:00	83.6	17.5747	16.82	83.6231	18.9748	16.41	119.336	6.47695	17.93	96.2455	21.2824	16.17	86.22	12.6184	17.51	89.03	20.3557	16.57
2013-12-20	21:15:00	2013-12-20 21:15:00	86.8	17.67	16.81	85.2231	19.2871	16.32	120.836	7.39053	17.91	97.9455	21.346	16.15	87.12	15.6412	17.5	91.23	20.5182	16.47
2013-12-20	21:30:00	2013-12-20 21:30:00	87.1	17.8497	16.78	89.6231	19.3392	16.29	123.636	17.273	17.2	100.645	21.3819	16.13	90.52	18.346	17.21	92.93	20.667	16.43
2013-12-20	21:45:00	2013-12-20 21:45:00	93.4	18.1632	16.68	92.5231	19.3392	16.29	127.836	19.4489	16.84	104.545	21.451	16.1	98.32	18.6657	17.02	98.23	20.8186	16.4
2013-12-20	22:00:00	2013-12-20 22:00:00	97.4	18.0377	16.69	95.6231	19.394	16.26	133.536	19.5147	16.66	107.945	21.5257	16.11	100.02	20.9676	16.58	101.53	20.9566	16.31
2013-12-20	22:15:00	2013-12-20 22:15:00	101.8	18.529	16.47	101.623	19.6053	16.2	137.336	19.4022	16.57	110.845	21.5589	16.12	103.52	20.3364	16.43	104.43	21.1277	16.24
2013-12-20	22:30:00	2013-12-20 22:30:00	107.4	19.2898	16.24	104.023	19.7508	16.15	143.936	19.0597	16.57	116.045	21.6225	16.14	109.02	21.628	16.32	110.73	21.3349	16.18
2013-12-20	22:45:00	2013-12-20 22:45:00	111	19.6684	16.12	107.423	19.8552	16.12	145.036	19.6794	16.48	120.545	21.6889	16.17	113.52	20.7635	16.31	115.63	21.4787	16.16
2013-12-20	23:00:00	2013-12-20 23:00:00	113.6	19.8387	16.08	114.123	20.0228	16.06	148.336	19.8002	16.44	125.645	21.8051	16.2	116.52	20.6918	16.34	119.53	21.6695	16.16
2013-12-20	23:15:00	2013-12-20 23:15:00	120.9	20.1301	16.02	120.223	20.2429	16	157.236	20.7718	16.37	132.645	22.0184	16.24	121.82	21.1084	16.32	125.53	21.8079	16.16
2013-12-20	23:30:00	2013-12-20 23:30:00	131.8	20.4714	15.99	123.723	20.6339	15.97	161.636	20.7718	16.41	136.245	22.3233	16.24	126.12	21.4068	16.29	132.33	21.9657	16.17
2013-12-20	23:45:00	2013-12-20 23:45:00	129	20.7166	16.05	131.723	20.9787	16.05	163.636	22.3899	16.28	140.645	22.6369	16.24	132.62	21.6391	16.3	132.53	22.1348	16.22
2013-12-21	00:00:00	2013-12-21	135.4	21.0145	16.08	139.423	21.3322	16.08	171.236	22.7369	16.25	147.345	22.873	16.25	142.22	21.9491	16.29	141.83	22.3344	16.22
2013-12-21	00:15:00	2013-12-21 00:15:00	143.4	21.2051	16.12	142.823	21.6004	16.11	177.236	22.8647	16.28	154.845	23.0287	16.27	143.72	22.0267	16.27	151.23	22.5647	16.22
2013-12-21	00:30:00	2013-12-21 00:30:00	144.7	21.2548	16.17	144.123	21.7941	16.13	182.536	22.8786	16.32	159.645	23.1845	16.28	149.62	21.6142	16.28	150.33	22.7563	16.3
2013-12-21	00:45:00	2013-12-21 00:45:00	154.5	21.2686	16.22	155.023	21.9187	16.15	186.236	22.9564	16.32	165.445	23.4684	16.29	156.92	22.0627	16.33	157.93	22.9425	16.3
2013-12-21	01:00:00	2013-12-21 01:00:00	154.2	21.2769	16.28	159.223	22.0627	16.2	193.436	23.1511	16.31	170.345	23.5687	16.3	163.52	22.5092	16.38	158.93	23.0843	16.29
2013-12-21	01:15:00	2013-12-21 01:15:00	160.2	21.2382	16.34	157.723	22.1265	16.22	197.036	23.1761	16.31	167.945	23.6355	16.31	157.82	21.9214	16.39	168.23	23.1678	16.29
2013-12-21	01:30:00	2013-12-21 01:30:00	168.2	21.2576	16.36	164.423	22.2346	16.24	198.536	23.3403	16.32	175.945	23.7331	16.32	167.92	22.2984	16.39	169.33	23.2679	16.29
2013-12-21	01:45:00	2013-12-21 01:45:00	166.2	21.3736	16.37	173.523	22.2568	16.27	206.036	23.3487	16.33	179.445	23.7916	16.32	167.92	22.2817	16.37	170.73	23.3431	16.29
2013-12-21	02:00:00	2013-12-21 02:00:00	167.6	21.4676	16.38	164.323	22.1569	16.3	201.836	22.9536	16.38	177.145	23.8725	16.33	170.72	22.3344	16.38	171.03	23.3849	16.3
2013-12-21	02:15:00	2013-12-21 02:15:00	168.8	21.4676	16.4	168.723	21.7553	16.38	205.036	22.8397	16.41	180.145	23.6049	16.38	169.22	22.035	16.38	168.93	23.4183	16.31
2013-12-21	02:30:00	2013-12-21 02:30:00	171	21.6806	16.35	163.923	21.6695	16.42	203.236	22.5397	16.45	171.145	23.2763	16.45	170.42	22.3566	16.37	168.13	23.4545	16.32
2013-12-21	02:45:00	2013-12-21 02:45:00	163.4	21.819	16.33	159.123	21.7359	16.41	198.136	22.5064	16.47	177.445	23.2123	16.47	170.22	22.4093	16.37	169.63	23.5213	16.34
2013-12-21	03:00:00	2013-12-21 03:00:00	167.1	21.8937	16.34	164.923	21.393	16.48	202.536	22.5397	16.47	175.245	23.2679	16.47	168.62	22.3095	16.36	170.63	23.4823	16.41
2013-12-21	03:15:00	2013-12-21 03:15:00	165.8	21.8965	16.35	166.223	21.2797	16.52	201.536	22.7425	16.44	176.045	23.1733	16.49	166.02	22.2096	16.38	173.33	23.3765	16.47
2013-12-21	03:30:00	2013-12-21 03:30:00	163.8	21.6751	16.42	161.923	21.0808	16.59	195.736	22.8619	16.42	173.145	23.2429	16.48	167.12	22.3843	16.4	166.93	23.3403	16.49
2013-12-21	03:45:00	2013-12-21 03:45:00	158.7	21.3626	16.5	160.323	21.0477	16.61	197.236	22.9759	16.41	169.545	23.3292	16.46	161.12	22.4842	16.45	164.43	23.3264	16.49
2013-12-21	04:00:00	2013-12-21 04:00:00	160.9	21.0891	16.56	154.823	21.1001	16.58	194.736	22.9759	16.36	164.445	23.3737	16.41	161.02	22.2623	16.47	162.03	23.3626	16.5
2013-12-21	04:15:00	2013-12-21 04:15:00	155	20.9814	16.57	147.923	21.1222	16.57	186.436	22.9342	16.33	162.145	23.2874	16.37	154.12	22.6341	16.43	157.33	23.4099	16.45
2013-12-21	04:30:00	2013-12-21 04:30:00	147.4	20.9373	16.56	147.523	21.1167	16.55	182.536	22.8091	16.34	155.745	23.2819	16.35	151.42	22.4565	16.4	151.73	23.4378	16.37
2013-12-21	04:45:00	2013-12-21 04:45:00	142.2	20.929	16.54	139.123	20.5127	16.53	176.936	22.6341	16.35	153.945	23.051	16.36	142.52	22.5536	16.39	146.13	23.4545	16.36
2013-12-21	05:00:00	2013-12-21 05:00:00	137.7	20.5926	16.52	133.123	20.5788	16.51	173.936	22.462	16.37	147.945	22.9509	16.39	140.02	22.1791	16.34	142.53	23.2791	16.32
2013-12-21	05:15:00	2013-12-21 05:15:00	130.5	19.7206	16.56	130.723	19.6053	16.55	167.336	22.3039	16.38	140.345	22.7869	16.4	132.72	21.8716	16.35	135.63	22.9564	16.31
2013-12-21	05:30:00	2013-12-21 05:30:00	124.5	19.6437	16.45	121.023	19.8497	16.44	164.336	22.1043	16.4	134.445	21.8411	16.47	126.02	21.4123	16.36	128.53	22.6286	16.34
2013-12-21	05:45:00	2013-12-21 05:45:00	118.9	19.8964	16.46	115.323	20.4466	16.47	156.236	21.6391	16.44	128.545	19.5476	16.63	124.72	21.2023	16.38	121.23	22.4093	16.35
2013-12-21	06:00:00	2013-12-21 06:00:00	112.3	19.9816	16.48	114.123	20.1603	16.47	149.436	21.2935	16.47	124.745	19.098	16.64	118.82	20.7635	16.44	115.73	21.9657	16.44
2013-12-21	06:15:00	2013-12-21 06:15:00	109.6	19.3172	16.47	105.323	19.2816	16.47	143.236	20.3915	16.54	117.245	18.4908	16.68	109.42	19.8497	16.52	109.73	21.5478	16.5
2013-12-21	06:30:00	2013-12-21 06:30:00	101	18.1468	16.51	101.623	17.9069	16.5	137.936	18.983	16.64	110.345	17.6727	16.74	105.42	19.8964	16.56	106.53	21.067	16.56
2013-12-21	06:45:00	2013-12-21 06:45:00	94.8	16.7574	16.59	91.6231	16.4405	16.57	131.736	18.0132	16.7	101.945	17.2594	16.77	97.82	19.5888	16.62	96.73	20.565	16.68
2013-12-21	07:00:00	2013-12-21 07:00:00	88.6	15.2911	16.69	85.7231	15.0411	16.65	124.036	17.4551	16.74	96.7455	17.1697	16.77	92.62	19.0816	16.73	90.13	19.6135	16.8
2013-12-21	07:15:00	2013-12-21 07:15:00	82.1	13.8788	16.79	79.0231	13.8148	16.76	118.536	17.053	16.77	90.0455	17.1697	16.77	85.92	17.5557	16.76	82.53	18.2723	16.84
2013-12-21	07:30:00	2013-12-21 07:30:00	76.8	12.8516	16.86	73.2231	12.5813	16.84	112.436	16.603	16.81	82.6455	17.1942	16.77	81.12	16.6517	16.79	75.23	17.2159	16.86
2013-12-21	07:45:00	2013-12-21 07:45:00	70.5	11.8627	16.94	67.2231	11.8495	16.9	107.236	16.4378	16.82	79.0455	17.2132	16.77	73.92	15.4795	16.86	69.93	16.5786	16.89
2013-12-21	08:00:00	2013-12-21 08:00:00	65.4	10.9065	17.03	61.0231	10.5013	17.02	101.536	16.081	16.86	72.8455	17.1942	16.77	69.32	14.7458	16.93	64.63	15.9783	16.94
2013-12-21	08:15:00	2013-12-21 08:15:00	61.9	9.92845	17.12	55.9231	9.58599	17.11	96.8364	15.8623	16.89	65.8455	17.0286	16.8	64.52	14.2128	16.99	58.63	15.5684	16.98
2013-12-21	08:30:00	2013-12-21 08:30:00	57.2	8.98133	17.23	50.9231	8.79079	17.22	93.1364	15.6223	16.94	62.3455	16.8441	16.84	60.52	13.9082	17.04	57.73	15.2158	17.04
2013-12-21	08:45:00	2013-12-21 08:45:00	53.9	7.9886	17.32	46.7231	8.33383	17.29	89.1364	15.1298	17.01	56.7455	16.5326	16.9	55.92	13.5215	17.09	51.63	14.9068	17.1
2013-12-21	09:00:00	2013-12-21 09:00:00	49.5	7.09673	17.4	44.1231	8.13678	17.35	85.3364	14.6975	17.09	55.2455	16.1377	16.97	52.52	13.1729	17.14	47.23	14.7512	17.17
2013-12-21	09:15:00	2013-12-21 09:15:00	47.4	6.25638	17.48	39.5231	7.02091	17.48	82.0364	14.2743	17.18	51.4455	15.3449	17.17	47.22	12.918	17.21	43.53	14.5769	17.26
2013-12-21	09:30:00	2013-12-21 09:30:00	44.1	5.3929	17.56	38.2231	5.77235	17.6	79.0364	13.8628	17.28	47.9455	15.0196	17.25	43.02	12.277	17.3	43.33	14.293	17.37
2013-12-21	09:45:00	2013-12-21 09:45:00	42.3	4.52828	17.65	37.7231	5.21014	17.69	76.7364	13.1251	17.39	47.7455	15.0491	17.3	43.22	11.8152	17.39	42.53	13.7801	17.49
2013-12-21	10:00:00	2013-12-21 10:00:00	41.5	3.70805	17.74	37.2231	4.54048	17.81	75.8364	12.2242	17.48	50.1455	14.7807	17.42	42.82	11.4521	17.49	41.83	13.064	17.61
2013-12-21	10:15:00	2013-12-21 10:15:00	42.9	3.039	17.82	39.7231	4.57952	18.13	76.1364	11.0663	17.61	47.5455	14.2476	17.59	44.12	11.1266	17.62	46.43	12.531	17.74
2013-12-21	10:30:00	2013-12-21 10:30:00	44.4	2.48609	17.9	41.9231	4.0621	18.24	78.3364	9.84794	17.76	52.1455	13.7561	17.75	44.12	10.9588	17.74	46.13	12.0473	17.88
2013-12-21	10:45:00	2013-12-21 10:45:00	48.6	2.08003	17.98	43.3231	3.48783	18.27	81.1364	8.97103	17.91	58.7455	13.2447	17.9	49.12	10.9248	17.85	49.83	11.9655	18.05
2013-12-21	11:00:00	2013-12-21 11:00:00	52.4	1.81806	18.07	50.7231	3.42579	18.37	84.9364	8.43122	18.03	60.1455	11.9813	18	54.02	10.9929	17.98	55.73	12.1925	18.12
2013-12-21	11:15:00	2013-12-21 11:15:00	57.4	1.6578	18.16	56.7231	3.36623	18.47	90.2364	8.32871	18.09	66.1455	12.1793	18.06	56.92	10.9196	18.22	58.13	12.674	18.14
2013-12-21	11:30:00	2013-12-21 11:30:00	61.7	2.58848	18.47	60.4231	4.20249	18.48	95.3364	9.68707	18.06	73.2455	13.0348	18.14	60.92	11.2708	18.52	67.33	13.8521	18.14
2013-12-21	11:45:00	2013-12-21 11:45:00	68.5	4.46735	18.67	66.3231	5.26935	18.56	100.836	11.2866	18.26	75.1455	13.1251	18.09	69.32	14.0952	18.51	72.43	15.3638	18.18
2013-12-21	12:00:00	2013-12-21 12:00:00	74.1	5.80717	18.67	73.5231	6.66039	18.57	106.136	11.7204	18.29	85.3455	13.6254	18.1	73.72	16.7791	18.39	80.03	16.3837	18.21
2013-12-21	12:15:00	2013-12-21 12:15:00	78.6	6.07887	18.67	78.3231	6.48197	18.58	113.436	11.8996	18.4	84.0455	17.034	17.78	76.02	17.3001	18.39	85.33	17.1399	18.19
2013-12-21	12:30:00	2013-12-21 12:30:00	87.2	8.09077	18.52	82.1231	9.74413	18.36	120.036	12.841	18.44	97.7455	17.9124	18	87.82	18.0786	18.32	90.13	17.9832	18.12
2013-12-21	12:45:00	2013-12-21 12:45:00	94.1	10.4961	18.37	89.1231	11.2446	18.42	124.436	16.6707	18.29	104.945	18.185	18.09	89.02	18.7641	18.22	94.83	18.5727	18.08
2013-12-21	13:00:00	2013-12-21 13:00:00	93.7	11.6151	18.31	94.6231	12.4145	18.29	128.636	17.9641	18.39	107.045	18.5645	18.13	100.52	19.0706	18.2	101.73	18.9994	18.06
2013-12-21	13:15:00	2013-12-21 13:15:00	102.9	13.4097	18.26	96.0231	14.1486	18.2	137.036	18.2396	18.56	115.645	18.8982	18.06	103.12	19.1775	18.19	109.03	19.3309	18
2013-12-21	13:30:00	2013-12-21 13:30:00	109.6	14.4483	18.23	107.423	14.9766	18.19	143.636	18.6793	18.46	121.645	19.1418	18.07	110.02	19.3913	18.14	110.93	19.7837	17.97
2013-12-21	13:45:00	2013-12-21 13:45:00	116.1	14.9686	18.27	109.523	15.4768	18.22	148.736	18.286	18.54	125.345	19.298	18.07	113.12	20.0696	18.1	118.13	20.0861	18
2013-12-21	14:00:00	2013-12-21 14:00:00	115.9	15.3503	18.28	115.823	15.9055	18.27	152.736	18.5755	18.4	127.745	19.3913	18.05	121.32	20.0448	18.16	117.63	20.353	18.06
2013-12-21	14:15:00	2013-12-21 14:15:00	121.6	15.6897	18.36	116.223	16.2431	18.33	161.236	18.827	18.4	132.445	19.4653	18.08	125.22	20.2594	18.14	125.63	20.6036	18.07
2013-12-21	14:30:00	2013-12-21 14:30:00	126.5	16.0594	18.36	124.923	16.5786	18.31	159.136	19.2597	18.43	138.545	19.6025	18.09	126.62	20.6698	18.22	131.43	20.8104	18.02
2013-12-21	14:45:00	2013-12-21 14:45:00	124.1	16.4	18.34	128.723	16.9391	18.33	166.736	19.4955	18.3	137.945	19.7892	18.04	137.82	20.0531	18.32	136.03	20.9593	18.01
2013-12-21	15:00:00	2013-12-21 15:00:00	137.4	16.6788	18.37	129.223	17.2023	18.43	170.336	19.7151	18.19	144.945	19.9184	18.04	138.72	20.0338	18.28	136.23	21.067	17.98
2013-12-21	15:15:00	2013-12-21 15:15:00	134.9	16.8414	18.52	132.623	17.3572	18.45	169.436	19.9046	18.09	145.745	20.2456	18.09	136.02	20.1218	18.2	138.13	21.1554	17.92
2013-12-21	15:30:00	2013-12-21 15:30:00	139.2	16.9879	18.56	135.723	17.6019	18.35	170.536	20.1411	18.11	146.445	20.4245	18.13	142.72	20.2264	18.12	141.33	21.4095	17.88
2013-12-21	15:45:00	2013-12-21 15:45:00	142.3	17.1806	18.41	142.023	17.7544	18.25	170.736	20.4025	18.06	148.345	20.5375	17.85	142.32	20.2153	18.04	144.93	21.4123	17.82
2013-12-21	16:00:00	2013-12-21 16:00:00	143.9	17.3789	18.27	137.423	17.9696	18.14	175.436	20.6119	17.93	150.745	20.6835	17.75	143.32	20.6009	17.92	140.13	21.498	17.75
2013-12-21	16:15:00	2013-12-21 16:15:00	144	17.4823	18.21	140.223	18.1032	18.04	174.936	20.7414	17.87	146.745	20.8324	17.67	139.72	20.6725	17.83	140.33	21.5838	17.71
2013-12-21	16:30:00	2013-12-21 16:30:00	138.8	17.5883	18.18	136.023	18.185	18	172.636	20.8711	17.8	146.545	21.0836	17.6	147.12	20.9814	17.8	141.53	21.6668	17.65
2013-12-21	16:45:00	2013-12-21 16:45:00	136	17.6618	18.18	133.123	18.2368	17.99	172.636	20.9621	17.77	152.045	21.194	17.58	139.82	20.8545	17.8	141.93	21.7166	17.63
2013-12-21	17:00:00	2013-12-21 17:00:00	135.6	17.7081	18.17	133.123	18.2696	17.98	175.136	20.8986	17.81	144.945	21.194	17.58	139.12	20.9511	17.79	142.13	21.7747	17.64
2013-12-21	17:15:00	2013-12-21 17:15:00	134.7	17.896	17.97	133.623	18.9009	17.67	168.536	21.0311	17.74	141.345	21.1139	17.6	137.42	21.0007	17.78	140.83	21.783	17.7
2013-12-21	17:30:00	2013-12-21 17:30:00	131.7	17.9669	17.96	130.423	19.035	17.58	168.836	21.3377	17.69	140.745	20.9538	17.65	135.32	20.9952	17.81	136.63	21.7525	17.76
2013-12-21	17:45:00	2013-12-21 17:45:00	124.5	17.8824	18.15	125.623	18.3133	18.01	164.336	21.4455	17.65	139.945	20.7525	17.73	129.02	20.94	17.88	131.93	21.6778	17.81
2013-12-21	18:00:00	2013-12-21 18:00:00	123.8	17.7489	18.34	122.023	17.8878	18.32	157.336	21.393	17.68	132.345	20.1136	18.04	127.02	20.8131	17.99	130.43	21.6004	17.98
2013-12-21	18:15:00	2013-12-21 18:15:00	121.1	17.4714	18.37	118.823	17.6537	18.4	157.136	21.3626	17.69	129.245	19.7123	18.2	123.22	20.6753	18.12	123.33	21.5091	18.11
2013-12-21	18:30:00	2013-12-21 18:30:00	117	17.2431	18.42	114.323	17.4333	18.42	151.836	20.94	17.85	126.445	19.298	18.37	120.22	20.5568	18.22	120.73	21.3377	18.26
2013-12-21	18:45:00	2013-12-21 18:45:00	109.8	16.9933	18.45	106.223	16.7682	18.49	145.836	20.6973	17.96	119.745	18.92	18.55	112.22	20.4769	18.31	116.03	21.1167	18.41
2013-12-21	19:00:00	2013-12-21 19:00:00	107.8	16.7547	18.47	105.723	14.9847	18.71	143.236	20.4686	18.05	118.045	18.6711	18.77	111.22	20.4218	18.39	112.63	20.9373	18.51
2013-12-21	19:15:00	2013-12-21 19:15:00	103.7	16.519	18.5	100.923	14.8209	18.76	138.736	19.7563	18.51	113.045	18.8927	18.6	106.02	20.2952	18.49	105.33	20.6891	18.81
2013-12-21	19:30:00	2013-12-21 19:30:00	100.1	15.9945	18.53	98.2231	14.3947	18.74	135.236	17.167	19.09	111.645	19.4763	18.39	104.92	19.9458	18.59	103.23	20.2952	18.91
2013-12-21	19:45:00	2013-12-21 19:45:00	96.2	14.9068	18.67	93.0231	13.6254	18.81	132.036	15.5873	19.25	105.145	19.6821	18.35	99.12	19.9568	18.68	97.63	19.7343	19.04
2013-12-21	20:00:00	2013-12-21 20:00:00	93.3	13.7374	18.82	89.5231	13.2952	18.83	128.136	15.0975	19.27	99.6455	19.6656	18.44	95.12	19.6217	18.78	95.93	19.2816	19.05
2013-12-21	20:15:00	2013-12-21 20:15:00	86.4	12.621	18.93	85.5231	14.3385	18.78	125.036	14.5447	19.27	98.3455	19.1336	18.59	91.72	19.9156	18.83	91.53	18.8653	19.09
2013-12-21	20:30:00	2013-12-21 20:30:00	86.4	11.5835	18.98	84.3231	14.9954	18.69	121.736	13.5481	19.31	96.2455	18.693	18.63	89.82	19.5312	18.86	89.73	18.3023	19.17
2013-12-21	20:45:00	2013-12-21 20:45:00	84.5	10.087	19.02	82.8231	15.1889	18.68	119.936	12.8941	19.31	95.5455	18.1659	18.67	87.12	19.2377	18.85	88.83	17.7952	19.23
2013-12-21	21:00:00	2013-12-21 21:00:00	83.6	8.83968	19.02	81.4231	15.722	18.63	118.436	11.918	19.34	92.8455	17.4442	18.74	86.72	18.7176	18.82	88.43	17.4578	19.25
2013-12-21	21:15:00	2013-12-21 21:15:00	83.2	10.0792	18.93	79.8231	16.1701	18.58	116.736	11.0322	19.36	94.5455	17.8851	18.71	83.82	17.148	18.96	86.33	17.2539	19.27
2013-12-21	21:30:00	2013-12-21 21:30:00	79.8	11.4179	18.82	76.5231	16.6436	18.52	115.336	10.4152	19.38	93.6455	20.0063	18.3	85.62	16.0161	19.22	83.23	16.9119	19.31
2013-12-21	21:45:00	2013-12-21 21:45:00	80.7	11.6914	18.79	78.9231	16.4676	18.52	115.736	10.0948	19.38	92.3455	20.0201	18.35	82.72	15.9621	19.23	83.93	16.7682	19.28
2013-12-21	22:00:00	2013-12-21 22:00:00	84.3	9.94924	18.85	81.4231	16.5624	18.49	116.636	10.0506	19.36	93.6455	20.8628	18.09	85.62	17.4605	19.03	84.63	16.6626	19.27
2013-12-21	22:15:00	2013-12-21 22:15:00	83.2	7.29418	18.86	81.2231	16.9933	18.41	119.936	10.828	19.28	93.8455	21.7	17.69	85.02	16.0296	19.18	88.73	17.4088	18.73
2013-12-21	22:30:00	2013-12-21 22:30:00	85.9	10.7312	18.81	87.7231	16.8224	18.5	121.336	12.1344	19.16	100.445	21.7664	17.6	89.42	16.0783	19.26	91.33	18.1141	18.53
2013-12-21	22:45:00	2013-12-21 22:45:00	91.1	12.9949	18.68	91.3231	17.091	18.43	127.336	14.0097	19.01	98.2455	21.8467	17.54	100.42	17.0584	19.2	95.53	18.9967	18.11
2013-12-21	23:00:00	2013-12-21 23:00:00	97.4	14.601	18.48	97.8231	17.3219	18.35	129.936	16.6544	18.71	107.745	21.8993	17.51	96.52	18.4935	18.98	105.53	19.7425	17.86
2013-12-21	23:15:00	2013-12-21 23:15:00	104.2	16.0891	18.26	102.723	17.1779	18.43	135.636	18.5973	18.38	114.045	21.783	17.51	102.22	19.1966	18.78	106.33	20.3062	17.7
2013-12-21	23:30:00	2013-12-21 23:30:00	107.4	16.4757	18.28	104.223	15.2642	18.65	145.136	19.2843	18.29	117.345	21.9076	17.46	110.62	19.405	18.72	111.63	20.78	17.63
2013-12-21	23:45:00	2013-12-21 23:45:00	115.1	15.0814	18.52	112.123	15.6681	18.64	148.936	19.3255	18.34	121.045	22.0544	17.39	116.12	20.3282	18.53	113.53	21.2465	17.64
2013-12-22	00:00:00	2013-12-22	118.8	15.9298	18.32	115.823	18.4471	18.06	152.736	19.6931	18.34	134.345	22.1902	17.35	123.82	21.0753	18.3	120.23	21.6142	17.66
2013-12-22	00:15:00	2013-12-22 00:15:00	119.8	17.8007	17.8	118.923	18.6083	17.93	156.736	20.1686	18.26	135.845	22.3289	17.34	128.02	21.4344	18.18	124.83	21.8633	17.73
2013-12-22	00:30:00	2013-12-22 00:30:00	132.2	18.6083	17.65	129.823	19.803	17.66	164.736	20.4796	18.23	139.945	22.4759	17.35	130.02	21.4538	18.17	131.63	22.1764	17.76
2013-12-22	00:45:00	2013-12-22 00:45:00	132.8	18.8161	17.65	135.223	19.9513	17.61	173.636	20.8517	18.17	147.945	22.5758	17.41	135.62	21.4897	18.13	140.33	22.2651	17.82
2013-12-22	01:00:00	2013-12-22 01:00:00	138.1	18.7997	17.71	140.823	19.8771	17.62	177.236	21.2935	18.08	145.545	22.6702	17.48	137.02	21.7525	18.06	139.13	22.3677	17.87
2013-12-22	01:15:00	2013-12-22 01:15:00	146.6	18.8106	17.72	143.723	19.9074	17.6	177.536	21.4538	18.07	147.045	22.7175	17.56	147.52	21.7387	18	148.93	22.5064	17.93
2013-12-22	01:30:00	2013-12-22 01:30:00	144	18.3569	17.95	148.223	19.9211	17.58	182.636	21.8024	18.03	152.245	22.8564	17.55	157.82	22.3205	17.97	150.23	22.6675	17.9
2013-12-22	01:45:00	2013-12-22 01:45:00	156.1	18.3842	17.95	146.223	19.8084	17.61	185.336	22.2651	17.87	161.645	22.9759	17.56	152.72	23.1678	17.94	155.03	22.8703	17.89
2013-12-22	02:00:00	2013-12-22 02:00:00	155.7	18.4771	18	155.323	19.7563	17.71	192.836	22.4787	17.83	169.845	22.9592	17.58	156.12	22.8842	17.92	159.73	22.9648	17.88
2013-12-22	02:15:00	2013-12-22 02:15:00	162.3	18.7723	17.99	158.323	19.9706	17.8	196.236	22.6591	17.86	165.445	23.1261	17.69	155.22	22.9703	17.9	159.63	23.1288	17.88
2013-12-22	02:30:00	2013-12-22 02:30:00	160.4	19.1665	18.04	157.423	20.3309	17.9	196.536	22.9509	17.86	173.545	23.3403	17.78	161.62	22.9509	17.9	167.43	23.229	17.89
2013-12-22	02:45:00	2013-12-22 02:45:00	167.2	19.5284	18.05	164.623	20.7001	17.96	198.336	23.254	17.88	182.445	23.6411	17.78	167.02	22.8703	17.91	169.43	23.3793	17.89
2013-12-22	03:00:00	2013-12-22 03:00:00	167.9	19.9239	17.99	162.223	21.1029	17.92	196.936	23.5909	17.84	170.745	23.9645	17.81	169.12	22.7925	17.92	171.63	23.293	17.9
2013-12-22	03:15:00	2013-12-22 03:15:00	165.8	20.3337	17.96	162.023	21.6059	17.92	200.136	23.7888	17.8	176.445	24.1264	17.84	167.82	22.6758	17.92	175.13	23.4628	17.91
2013-12-22	03:30:00	2013-12-22 03:30:00	161.5	20.5953	17.97	160.823	21.8605	17.92	194.636	24.0036	17.82	167.745	24.2687	17.84	165.02	22.9787	17.93	167.43	23.5492	17.92
2013-12-22	03:45:00	2013-12-22 03:45:00	159.4	20.7911	17.95	157.823	21.9325	17.91	194.136	24.1236	17.83	168.645	24.3358	17.84	165.62	22.8286	17.94	167.83	23.5269	17.93
2013-12-22	04:00:00	2013-12-22 04:00:00	153	20.9814	17.92	157.123	22.0073	17.87	191.436	24.2073	17.84	167.245	24.2827	17.85	163.22	23.616	17.95	161.83	23.5492	17.93
2013-12-22	04:15:00	2013-12-22 04:15:00	151	21.0394	17.91	151.323	21.9325	17.88	192.836	24.2213	17.85	164.945	24.2659	17.87	155.22	22.873	17.96	157.13	23.5742	17.94
2013-12-22	04:30:00	2013-12-22 04:30:00	151.3	21.0587	17.9	148.723	21.8328	17.89	181.836	24.1543	17.85	160.245	24.185	17.87	151.52	22.9453	17.97	152.73	23.5213	17.94
2013-12-22	04:45:00	2013-12-22 04:45:00	147.2	21.0201	17.93	146.423	21.6695	17.9	180.436	24.0677	17.86	160.545	24.1208	17.87	153.22	22.1071	17.97	151.43	23.5603	17.95
2013-12-22	05:00:00	2013-12-22 05:00:00	146.3	20.9759	17.98	145.123	21.5146	17.95	178.936	24.0064	17.87	152.845	23.998	17.89	144.12	22.8703	17.99	146.43	23.5492	17.97
2013-12-22	05:15:00	2013-12-22 05:15:00	141.4	20.8655	17.99	138.823	21.1388	18	175.836	23.8474	17.9	150.145	23.839	17.91	143.12	22.5869	17.99	142.63	23.5659	17.98
2013-12-22	05:30:00	2013-12-22 05:30:00	136.7	20.5402	18.07	134.223	20.4328	18.12	171.736	23.5937	17.93	147.045	23.5965	17.94	138.52	22.7897	17.99	141.53	23.474	17.97
2013-12-22	05:45:00	2013-12-22 05:45:00	130.8	20.1906	18.13	130.723	20.3475	18.14	167.336	23.3125	17.95	141.245	23.2513	17.97	135.42	22.6897	18	131.63	23.3737	17.97
2013-12-22	06:00:00	2013-12-22 06:00:00	126.5	20.0943	18.13	126.323	20.565	18.13	161.936	22.9092	18.07	135.545	22.7758	18.05	129.52	22.7702	18.02	129.23	23.3013	17.99
2013-12-22	06:15:00	2013-12-22 06:15:00	121.8	19.6684	18.32	117.823	19.8359	18.3	159.736	22.6425	18.15	134.745	21.7304	18.45	126.62	22.1653	18.07	125.63	23.2429	18.03
2013-12-22	06:30:00	2013-12-22 06:30:00	116.6	18.4716	18.32	120.123	17.2295	18.32	153.136	21.6363	18.42	122.345	21.1498	18.53	117.92	21.5561	18.11	119.33	23.1149	18.08
2013-12-22	06:45:00	2013-12-22 06:45:00	108.7	17.4632	18.33	103.623	16.3567	18.36	147.636	20.7056	18.47	119.645	20.4962	18.49	117.12	22.1653	18.18	112.53	23.0398	18.13
2013-12-22	07:00:00	2013-12-22 07:00:00	105.3	15.7059	18.46	102.723	14.186	18.45	140.536	20.4438	18.41	111.945	20.2346	18.44	108.52	21.747	18.3	108.93	22.9259	18.21
2013-12-22	07:15:00	2013-12-22 07:15:00	100.3	13.8495	18.5	95.1231	12.2797	18.49	135.236	20.2071	18.46	105.445	20.2264	18.45	100.12	21.581	18.43	103.93	22.6841	18.34
2013-12-22	07:30:00	2013-12-22 07:30:00	94.4	12.2427	18.51	92.0231	11.0899	18.5	129.636	19.9321	18.54	99.2455	19.9458	18.52	95.92	20.918	18.54	95.73	22.4426	18.5
2013-12-22	07:45:00	2013-12-22 07:45:00	90.9	10.8541	18.54	87.4231	10.0038	18.52	125.036	19.5065	18.63	99.9455	19.8249	18.55	93.82	20.6725	18.62	89.53	22.1098	18.59
2013-12-22	08:00:00	2013-12-22 08:00:00	84.5	9.59117	18.56	84.6231	8.81395	18.54	120.236	18.8489	18.65	92.8455	19.5092	18.62	86.02	20.4631	18.68	86.23	21.8716	18.65
2013-12-22	08:15:00	2013-12-22 08:15:00	82.1	8.88345	18.56	82.4231	8.53126	18.56	117.436	17.7517	18.69	91.7455	19.1364	18.66	83.92	19.8359	18.76	82.43	21.5838	18.75
2013-12-22	08:30:00	2013-12-22 08:30:00	77.9	8.13167	18.6	78.2231	7.85849	18.6	113.536	17.0503	18.76	88.1455	18.4771	18.72	79.92	18.7969	18.81	79.13	20.7525	18.86
2013-12-22	08:45:00	2013-12-22 08:45:00	78.4	7.30939	18.62	75.1231	7.72855	18.62	112.136	16.6003	18.81	88.8455	18.0296	18.78	80.42	17.3409	18.86	77.13	19.8936	18.91
2013-12-22	09:00:00	2013-12-22 09:00:00	74.1	6.43178	18.64	68.5231	6.06389	18.65	108.536	16.2647	18.85	80.1455	17.8769	18.78	76.22	15.9621	18.91	73.33	18.9502	18.98
2013-12-22	09:15:00	2013-12-22 09:15:00	71.4	5.18548	18.69	66.7231	5.96658	18.69	106.536	15.8002	18.9	79.9455	17.1589	18.84	74.72	14.7994	18.98	73.33	18.0159	19.06
2013-12-22	09:30:00	2013-12-22 09:30:00	66.7	4.21461	18.71	62.9231	4.18795	18.74	103.036	15.1862	19	75.8455	16.8631	18.87	69.52	14.3198	19.06	69.73	17.2376	19.15
2013-12-22	09:45:00	2013-12-22 09:45:00	63.1	3.44249	18.73	60.2231	3.72485	18.78	99.2364	14.6841	19.1	70.0455	16.3675	18.92	68.82	13.7321	19.14	60.73	16.4784	19.25
2013-12-22	10:00:00	2013-12-22 10:00:00	61.9	2.8177	18.77	58.8231	3.34481	18.83	96.4364	14.1085	19.21	68.9455	15.9702	19	64.22	12.8782	19.27	60.73	15.8137	19.36
2013-12-22	10:15:00	2013-12-22 10:15:00	59.5	2.31696	18.8	57.8231	2.75205	18.92	94.4364	13.3405	19.34	64.1455	15.111	19.19	62.12	12.4727	19.39	62.43	15.2669	19.48
2013-12-22	10:30:00	2013-12-22 10:30:00	60.8	1.9635	18.84	60.2231	2.36089	19	94.8364	12.8065	19.45	72.5455	14.2262	19.42	60.72	12.0473	19.45	61.53	14.5769	19.59
2013-12-22	10:45:00	2013-12-22 10:45:00	61.3	1.64432	18.89	57.4231	2.29617	19.08	95.7364	12.4516	19.55	68.2455	13.5828	19.59	64.32	12.1449	19.54	65.43	14.0952	19.69
2013-12-22	11:00:00	2013-12-22 11:00:00	65.3	1.45647	18.95	61.2231	1.89294	19.14	99.3364	12.1687	19.66	75.6455	13.1995	19.68	68.42	12.0051	19.68	66.63	14.0203	19.76
2013-12-22	11:15:00	2013-12-22 11:15:00	68.9	1.32567	19.04	67.2231	1.7728	19.2	103.436	12.0103	19.81	80.4455	12.8012	19.71	69.12	12.2612	19.86	67.73	14.6224	19.58
2013-12-22	11:30:00	2013-12-22 11:30:00	74.1	1.80673	19.35	74.9231	3.54039	19.4	108.536	11.9312	19.92	86.8455	13.2793	19.75	76.22	17.2159	19.83	78.33	15.353	19.91
2013-12-22	11:45:00	2013-12-22 11:45:00	80.5	2.96823	19.58	78.5231	4.42353	19.53	114.036	11.9919	19.96	90.5455	14.4831	19.65	78.52	18.8489	20.01	84.33	16.3053	19.96
2013-12-22	12:00:00	2013-12-22 12:00:00	85.2	4.11046	19.58	83.6231	5.67046	19.6	120.436	13.3511	20.02	96.6455	19.3117	19.04	87.72	19.4873	20.08	88.93	17.1562	19.84
2013-12-22	12:15:00	2013-12-22 12:15:00	92.7	5.67046	19.86	85.3231	11.4337	19.53	124.436	18.2096	19.57	102.945	20.1328	19.55	91.92	20.2731	19.98	96.23	17.847	19.79
2013-12-22	12:30:00	2013-12-22 12:30:00	94.9	9.35047	19.86	95.5231	12.7986	19.68	132.036	19.3419	19.75	108.845	20.532	19.79	96.12	20.8655	19.91	102.03	18.57	19.7
2013-12-22	12:45:00	2013-12-22 12:45:00	100.5	11.3759	19.9	99.7231	13.8441	19.8	135.636	20.2456	19.84	109.945	21.2741	19.71	102.82	21.8799	19.83	104.63	19.2021	19.67
2013-12-22	13:00:00	2013-12-22 13:00:00	107.7	12.674	19.9	102.323	14.4001	19.85	140.336	21.0118	19.75	116.845	21.7802	19.63	109.32	21.7442	19.8	114.63	19.7425	19.61
2013-12-22	13:15:00	2013-12-22 13:15:00	112.3	13.3352	19.93	107.823	14.4992	19.9	145.136	21.4593	19.7	123.645	21.8965	19.61	119.42	21.5118	19.77	108.63	20.1961	19.61
2013-12-22	13:30:00	2013-12-22 13:30:00	113.6	13.8308	19.95	112.423	14.8048	19.93	153.136	21.7193	19.66	126.845	22.2679	19.58	119.82	22.2429	19.72	120.23	20.6257	19.59
2013-12-22	13:45:00	2013-12-22 13:45:00	122.5	14.2128	19.99	118.223	15.1647	19.93	156.536	22.0295	19.63	133.145	22.5703	19.57	127.92	22.254	19.7	125.63	21.0118	19.64
2013-12-22	14:00:00	2013-12-22 14:00:00	127	14.7619	19.97	120.823	16.519	19.53	160.736	22.4648	19.62	139.845	23.0371	19.55	123.82	22.6841	19.73	129.73	21.393	19.66
2013-12-22	14:15:00	2013-12-22 14:15:00	135.1	16.1323	19.06	129.823	18.185	18.83	164.336	22.9953	19.6	142.245	23.3765	19.53	137.42	23.101	19.73	136.43	21.7055	19.65
2013-12-22	14:30:00	2013-12-22 14:30:00	134.2	17.4659	19.15	135.823	19.5668	18.93	168.136	23.2234	19.56	143.545	23.5464	19.45	138.52	23.0899	19.75	140.73	21.9768	19.67
2013-12-22	14:45:00	2013-12-22 14:45:00	141.7	18.5919	19.09	139.823	20.386	19.05	177.536	23.4712	19.5	149.845	23.7442	19.42	143.32	23.0676	19.74	142.13	22.2512	19.64
2013-12-22	15:00:00	2013-12-22 15:00:00	146.8	19.3446	19.03	139.523	20.918	19.08	178.436	23.6745	19.44	152.245	23.9004	19.36	143.32	23.2513	19.74	146.23	22.5314	19.54
2013-12-22	15:15:00	2013-12-22 15:15:00	146.4	19.759	18.97	142.423	21.1774	19.13	181.036	23.8474	19.45	151.945	24.1152	19.42	148.22	23.5046	19.72	150.03	22.7647	19.54
2013-12-22	15:30:00	2013-12-22 15:30:00	144.3	19.9898	18.95	140.323	21.4704	19.3	179.836	24.0371	19.48	154.145	24.2632	19.45	146.02	23.7582	19.69	143.63	22.987	19.56
2013-12-22	15:45:00	2013-12-22 15:45:00	143.7	20.2649	19.05	142.423	21.6087	19.31	178.636	24.1459	19.47	152.845	24.3693	19.43	144.12	23.1316	19.67	145.03	23.2039	19.55
2013-12-22	16:00:00	2013-12-22 16:00:00	147.3	20.543	19.31	146.223	21.7913	19.29	182.536	24.2101	19.46	155.745	24.4335	19.43	149.32	23.6745	19.67	147.93	23.3514	19.56
2013-12-22	16:15:00	2013-12-22 16:15:00	144.5	20.7993	19.52	147.023	22.1098	19.47	181.236	24.2799	19.46	158.945	24.509	19.44	148.92	23.9534	19.67	153.43	23.5241	19.57
2013-12-22	16:30:00	2013-12-22 16:30:00	151.2	20.9676	19.56	141.723	22.2401	19.49	187.536	24.3441	19.48	156.145	24.6068	19.47	150.22	24.2269	19.69	153.43	23.655	19.58
2013-12-22	16:45:00	2013-12-22 16:45:00	144.7	21.1029	19.56	144.323	22.3455	19.5	175.836	24.3888	19.49	154.345	24.618	19.47	148.32	23.9617	19.69	149.73	23.7609	19.58
2013-12-22	17:00:00	2013-12-22 17:00:00	149.1	21.252	19.52	137.423	22.3344	19.5	178.636	24.4084	19.49	151.645	24.6096	19.47	142.62	23.9952	19.69	150.03	23.8641	19.59
2013-12-22	17:15:00	2013-12-22 17:15:00	142.5	21.3543	19.53	144.323	22.4343	19.5	177.736	24.4307	19.5	157.145	24.6068	19.5	145.22	23.8446	19.7	147.33	23.9561	19.6
2013-12-22	17:30:00	2013-12-22 17:30:00	137.7	21.4897	19.55	137.223	22.4842	19.51	174.036	24.3832	19.54	150.745	24.5816	19.52	141.82	24.252	19.74	142.43	24.0398	19.63
2013-12-22	17:45:00	2013-12-22 17:45:00	142.5	21.6308	19.55	136.323	22.5564	19.53	174.536	24.2771	19.69	150.045	24.4782	19.6	141.62	24.6683	19.8	141.23	24.118	19.67
2013-12-22	18:00:00	2013-12-22 18:00:00	134	21.7636	19.56	135.723	22.4648	19.54	173.836	24.185	19.82	143.545	24.3553	19.79	137.82	24.0231	19.85	135.03	24.1626	19.73
2013-12-22	18:15:00	2013-12-22 18:15:00	135.5	21.866	19.62	131.823	22.6286	19.57	170.536	23.9115	19.88	145.945	24.0901	19.87	128.42	23.7582	19.89	134.03	24.2101	19.8
2013-12-22	18:30:00	2013-12-22 18:30:00	131	21.855	19.67	129.923	22.4176	19.64	165.836	23.7275	19.93	140.045	23.9227	19.92	135.12	24.2827	19.94	130.43	24.2659	19.87
2013-12-22	18:45:00	2013-12-22 18:45:00	130.5	21.8522	19.67	124.223	22.4482	19.66	162.336	23.5937	19.98	134.845	23.7554	19.96	131.32	23.669	19.95	129.33	24.2324	19.91
2013-12-22	19:00:00	2013-12-22 19:00:00	126.9	21.8577	19.75	122.923	21.5782	19.96	162.536	23.3876	20.04	135.945	23.5798	20.02	120.22	23.4767	20	131.53	24.1208	19.96
2013-12-22	19:15:00	2013-12-22 19:15:00	122	21.3653	20.04	120.823	21.2603	20.05	156.336	23.1066	20.11	130.545	23.3069	20.09	126.12	23.4071	20.05	125.33	24.1236	20
2013-12-22	19:30:00	2013-12-22 19:30:00	118.1	20.9069	20.29	114.523	20.838	20.18	154.636	22.8397	20.19	124.145	23.012	20.15	121.22	23.2596	20.07	121.03	24.0426	20.02
2013-12-22	19:45:00	2013-12-22 19:45:00	115.4	20.4466	20.41	114.023	20.1988	20.35	153.136	22.6925	20.32	127.445	22.8147	20.24	118.52	22.9898	20.13	116.83	23.9366	20.04
2013-12-22	20:00:00	2013-12-22 20:00:00	111.2	20.0421	20.36	105.923	19.7453	20.34	144.736	22.4759	20.42	115.745	22.2179	20.47	112.52	22.6425	20.23	113.03	23.8362	20.12
2013-12-22	20:15:00	2013-12-22 20:15:00	107.3	19.5586	20.36	101.123	18.6329	20.33	141.536	21.8273	20.58	116.145	22.2873	20.43	110.22	22.2124	20.35	110.43	23.669	20.27
2013-12-22	20:30:00	2013-12-22 20:30:00	101.7	18.4225	20.46	101.023	17.4007	20.39	137.036	20.8517	20.71	111.345	20.7635	20.61	106.62	23.2373	20.46	105.53	23.4043	20.4
2013-12-22	20:45:00	2013-12-22 20:45:00	95.5	16.519	20.49	91.3231	14.668	20.4	132.836	20.1521	20.77	103.545	18.6903	20.83	98.62	22.0212	20.53	98.83	23.3487	20.5
2013-12-22	21:00:00	2013-12-22 21:00:00	92.2	14.837	20.4	90.5231	10.6789	20.26	127.636	19.0624	20.83	102.445	18.5126	20.82	92.32	21.9962	20.57	95.93	23.1706	20.53
2013-12-22	21:15:00	2013-12-22 21:15:00	89.4	13.1969	20.29	86.7231	9.21868	20.17	124.336	18.346	20.85	97.9455	18.5399	20.81	90.92	21.999	20.59	90.63	22.9981	20.55
2013-12-22	21:30:00	2013-12-22 21:30:00	84.7	11.8389	20.19	83.1231	8.41327	20.11	121.736	17.6183	20.86	95.6455	18.2805	20.83	87.82	21.31	20.6	89.83	22.823	20.55
2013-12-22	21:45:00	2013-12-22 21:45:00	82.9	10.4439	20.1	84.0231	8.4466	20.09	120.136	17.1317	20.87	94.2455	18.0977	20.83	84.62	21.2327	20.61	87.03	22.6647	20.55
2013-12-22	22:00:00	2013-12-22 22:00:00	83.6	9.41512	20.04	81.4231	8.08055	20.05	120.136	16.6598	20.88	96.6455	18.5317	20.81	87.12	21.3239	20.63	86.73	22.4898	20.55
2013-12-22	22:15:00	2013-12-22 22:15:00	84.9	8.61856	19.98	79.8231	8.28261	20.06	118.836	16.5001	20.88	94.2455	18.4935	20.8	88.82	21.2962	20.63	85.83	22.3677	20.56
2013-12-22	22:30:00	2013-12-22 22:30:00	83.8	8.06777	19.94	84.0231	11.4731	20.14	120.636	16.6273	20.87	95.3455	19.0898	20.73	87.82	21.2355	20.62	87.73	22.254	20.55
2013-12-22	22:45:00	2013-12-22 22:45:00	87	7.40322	19.9	83.1231	13.3697	20.26	122.436	15.2158	20.75	97.0455	18.9857	20.76	87.32	21.2327	20.61	90.13	22.1736	20.54
2013-12-22	23:00:00	2013-12-22 23:00:00	88.1	7.85339	20.02	85.5231	14.3466	20.37	123.336	16.8604	20.8	98.6455	20.0888	20.73	89.62	21.6446	20.61	91.83	22.0849	20.54
2013-12-22	23:15:00	2013-12-22 23:15:00	89.1	9.26518	20.22	88.5231	15.2185	20.51	125.836	19.1473	20.75	97.7455	20.8849	20.54	90.92	21.2023	20.6	97.83	22.0655	20.53
2013-12-22	23:30:00	2013-12-22 23:30:00	92.2	10.3083	20.32	89.3231	16.4487	20.34	128.136	20.2181	20.74	101.045	21.2493	20.48	92.52	21.3322	20.59	99.03	22.1542	20.44
2013-12-22	23:45:00	2013-12-22 23:45:00	97.2	12.0235	20.41	95.3231	17.148	20.44	130.136	20.532	20.74	105.345	21.3736	20.51	100.92	20.7663	20.58	102.23	22.2179	20.37
2013-12-23	00:00:00	2013-12-23	98.3	13.4017	20.43	98.0231	18.4443	20.52	135.836	20.6505	20.74	109.245	21.4593	20.51	104.22	21.4261	20.59	103.43	22.3344	20.28
2013-12-23	00:15:00	2013-12-23 00:15:00	105.5	14.7002	20.49	102.823	18.9611	20.49	138.236	20.4328	20.62	112.245	21.8301	20.49	107.82	22.1847	20.48	110.23	22.426	20.24
2013-12-23	00:30:00	2013-12-23 00:30:00	107	15.8191	20.53	105.923	19.2816	20.48	143.636	20.8986	20.51	117.345	22.1625	20.48	112.32	23.1233	20.38	114.63	22.5842	20.21
2013-12-23	00:45:00	2013-12-23 00:45:00	108.4	16.6626	20.51	110.823	19.5229	20.45	146.636	21.0201	20.45	121.445	22.7786	20.42	115.02	23.2596	20.31	115.73	22.723	20.22
2013-12-23	01:00:00	2013-12-23 01:00:00	110.4	17.3273	20.5	114.123	20.0641	20.44	148.336	20.9014	20.41	122.745	23.229	20.33	115.82	23.0315	20.26	117.93	22.8564	20.19
2013-12-23	01:15:00	2013-12-23 01:15:00	115.4	17.975	20.48	115.523	20.3585	20.37	150.636	20.9925	20.42	125.045	23.435	20.27	116.52	22.9787	20.24	121.13	22.9926	20.14
2013-12-23	01:30:00	2013-12-23 01:30:00	120.4	18.4471	20.47	120.623	20.6449	20.29	153.136	21.3018	20.4	127.445	23.5547	20.23	121.52	23.2012	20.18	124.33	23.1316	20.05
2013-12-23	01:45:00	2013-12-23 01:45:00	128.7	18.8106	20.34	125.123	20.7607	20.21	157.936	22.0018	20.37	133.745	23.5937	20.19	125.82	23.6077	20.1	129.33	23.2902	19.97
2013-12-23	02:00:00	2013-12-23 02:00:00	129.1	19.1884	20.22	125.323	20.8766	20.06	161.936	22.254	20.25	137.645	23.7303	20.12	128.82	23.7554	20.01	134.23	23.3932	19.94
2013-12-23	02:15:00	2013-12-23 02:15:00	128.3	19.4379	20.17	129.423	21.0339	19.89	166.936	22.9592	20.08	140.245	23.8446	20.07	134.02	23.8028	19.97	135.03	23.4962	19.92
2013-12-23	02:30:00	2013-12-23 02:30:00	133.2	19.6437	20.09	128.623	21.2216	19.84	167.136	23.2457	20.02	145.945	24.051	20	137.42	23.8948	19.95	141.73	23.6272	19.86
2013-12-23	02:45:00	2013-12-23 02:45:00	135.1	19.8002	20.06	133.223	21.3791	19.86	170.236	23.63	19.93	144.645	24.3553	19.9	143.02	23.9561	19.9	141.93	23.7136	19.83
2013-12-23	03:00:00	2013-12-23 03:00:00	141	20.0256	20.04	137.123	21.5174	19.9	172.436	23.9366	19.87	147.645	24.6627	19.83	138.82	23.8446	19.87	140.13	23.8279	19.77
2013-12-23	03:15:00	2013-12-23 03:15:00	141	20.3612	20.01	136.923	21.7083	19.95	180.436	24.2659	19.79	153.945	24.9481	19.72	140.92	24.1068	19.83	144.13	23.9534	19.69
2013-12-23	03:30:00	2013-12-23 03:30:00	140.9	20.7001	20.01	136.923	21.9935	19.98	174.936	24.5285	19.68	154.145	25.1972	19.59	146.22	23.8976	19.76	147.93	24.0622	19.62
2013-12-23	03:45:00	2013-12-23 03:45:00	145	21.0007	19.98	145.323	22.132	19.96	177.636	24.7578	19.56	146.345	25.3429	19.52	145.12	24.9537	19.69	148.93	24.1738	19.59
2013-12-23	04:00:00	2013-12-23 04:00:00	145.7	21.2769	19.96	145.523	22.3233	19.94	179.836	24.9313	19.49	149.445	25.4578	19.48	145.22	24.3469	19.64	147.93	24.2632	19.56
2013-12-23	04:15:00	2013-12-23 04:15:00	144.1	21.4897	19.93	143.323	22.5731	19.92	179.636	24.9984	19.46	152.845	25.5391	19.48	145.82	25.2589	19.62	146.63	24.3832	19.55
2013-12-23	04:30:00	2013-12-23 04:30:00	145.2	21.7415	19.91	144.723	22.937	19.88	179.336	25.0796	19.46	158.745	25.5924	19.46	146.82	24.4671	19.61	144.33	24.4475	19.56
2013-12-23	04:45:00	2013-12-23 04:45:00	141.8	22.0045	19.87	137.223	23.1316	19.85	179.336	25.144	19.45	153.045	25.6625	19.46	142.72	23.6188	19.59	147.73	24.5453	19.58
2013-12-23	05:00:00	2013-12-23 05:00:00	139.6	22.2928	19.81	141.423	23.3932	19.79	174.836	25.1748	19.45	153.745	25.6233	19.47	147.02	24.4503	19.58	141.63	24.6348	19.59
2013-12-23	05:15:00	2013-12-23 05:15:00	135.7	22.4704	19.8	133.523	23.4795	19.77	168.036	25.1636	19.45	147.845	25.4746	19.47	140.12	25.1804	19.58	139.83	24.6991	19.6
2013-12-23	05:30:00	2013-12-23 05:30:00	134.8	22.598	19.79	127.923	23.474	19.77	169.836	24.9564	19.56	140.745	25.2589	19.56	133.52	24.4894	19.61	137.63	24.7438	19.61
2013-12-23	05:45:00	2013-12-23 05:45:00	127	22.6619	19.8	124.223	23.229	19.81	162.536	24.6795	19.7	136.545	24.9509	19.71	129.52	24.3916	19.68	134.43	24.7718	19.64
2013-12-23	06:00:00	2013-12-23 06:00:00	120.9	22.6758	19.83	121.823	23.051	19.8	157.036	24.3972	19.82	133.345	24.727	19.8	125.82	24.5369	19.74	127.03	24.8193	19.7
2013-12-23	06:15:00	2013-12-23 06:15:00	116.8	22.5703	19.88	116.723	21.8605	19.93	152.436	24.3777	19.87	127.645	24.59	19.86	122.52	24.4587	19.8	122.93	24.8221	19.77
2013-12-23	06:30:00	2013-12-23 06:30:00	113.9	22.4121	19.94	111.123	21.1526	20.01	147.936	24.2771	19.94	122.745	24.604	19.91	115.22	24.604	19.82	114.43	24.8417	19.77
2013-12-23	06:45:00	2013-12-23 06:45:00	111.1	21.9436	20.03	110.023	21.0698	20.07	147.336	23.9004	20.04	123.145	24.2659	20	112.52	24.4559	19.86	112.83	24.8613	19.81
2013-12-23	07:00:00	2013-12-23 07:00:00	108.7	21.2658	20.09	106.123	18.005	20.05	141.136	23.6439	20.1	120.145	23.892	20.09	110.82	24.3218	19.87	105.53	24.8305	19.84
2013-12-23	07:15:00	2013-12-23 07:15:00	104.9	20.5898	20.1	103.923	19.5257	20.04	139.436	22.7508	20.24	115.045	24.0147	20.08	107.62	24.3972	19.89	110.13	24.8277	19.86
2013-12-23	07:30:00	2013-12-23 07:30:00	102.4	19.4159	20.1	103.523	19.298	20.04	140.336	20.5843	20.39	115.345	24.4615	20.07	103.52	24.0594	19.94	105.13	24.8082	19.87
2013-12-23	07:45:00	2013-12-23 07:45:00	100.3	17.9968	20.07	98.7231	17.0802	20.01	134.736	20.2429	20.4	107.045	22.8008	20.17	96.92	24.0677	20.04	100.33	24.7354	19.92
2013-12-23	08:00:00	2013-12-23 08:00:00	93.7	16.4595	20.02	91.0231	14.5983	19.92	129.636	19.3995	20.44	101.845	22.6675	20.21	99.22	23.1121	20.15	94.53	24.6236	20.09
2013-12-23	08:15:00	2013-12-23 08:15:00	92.4	14.5367	19.92	81.4231	10.0298	19.76	128.336	18.4935	20.52	100.345	21.393	20.31	95.42	22.7508	20.23	95.03	24.4587	20.18
2013-12-23	08:30:00	2013-12-23 08:30:00	88.6	11.781	19.76	83.6231	7.16503	19.7	124.636	18.2287	20.55	99.0455	19.3666	20.45	93.82	21.8217	20.32	90.63	24.2855	20.25
2013-12-23	08:45:00	2013-12-23 08:45:00	82.4	10.4309	19.75	81.6231	6.50959	19.7	118.636	18.1086	20.56	88.8455	18.417	20.57	84.42	22.4593	20.36	85.63	24.0957	20.34
2013-12-23	09:00:00	2013-12-23 09:00:00	78.4	9.25484	19.74	75.4231	6.08886	19.72	115.236	15.9756	20.62	88.8455	18.0132	20.6	80.62	22.9787	20.42	81.03	23.8474	20.43
2013-12-23	09:15:00	2013-12-23 09:15:00	75.4	7.59371	19.68	69.1231	5.81215	19.72	111.836	14.3385	20.59	83.0455	18.2123	20.62	78.52	22.0267	20.45	82.13	23.6578	20.43
2013-12-23	09:30:00	2013-12-23 09:30:00	71.9	6.36909	19.68	70.8231	5.56129	19.73	107.636	13.5695	20.61	78.8455	17.167	20.7	74.72	21.4759	20.53	75.53	23.4183	20.55
2013-12-23	09:45:00	2013-12-23 09:45:00	68.7	5.44238	19.68	64.6231	5.20767	19.75	105.136	13.8281	20.6	79.5455	16.3783	20.77	73.02	20.8435	20.61	70.83	23.14	20.66
2013-12-23	10:00:00	2013-12-23 10:00:00	67.4	4.85598	19.71	64.6231	4.67723	19.79	103.036	15.722	20.5	79.0455	16.0053	20.82	71.82	20.3254	20.69	71.93	22.7925	20.76
2013-12-23	10:15:00	2013-12-23 10:15:00	64.6	4.33111	19.73	60.2231	4.23644	19.82	100.136	15.2454	20.57	71.1455	15.5415	20.85	68.82	20.1548	20.75	62.73	22.487	20.81
2013-12-23	10:30:00	2013-12-23 10:30:00	61.7	3.90281	19.79	59.8231	3.91486	19.88	97.7364	14.9551	20.62	71.7455	15.1459	20.87	63.02	20.1466	20.82	62.53	22.1542	20.87
2013-12-23	10:45:00	2013-12-23 10:45:00	60.1	3.57866	19.9	51.8231	3.57148	19.94	95.2364	13.0773	20.85	71.1455	15.2427	20.9	63.42	19.3721	20.88	64.63	21.8494	20.93
2013-12-23	11:00:00	2013-12-23 11:00:00	60.2	3.37337	19.96	59.5231	3.40672	20.05	95.7364	11.2499	20.99	70.6455	15.3369	20.94	64.62	19.9953	20.94	60.33	21.5589	21.03
2013-12-23	11:15:00	2013-12-23 11:15:00	58.4	3.17857	20.04	55.7231	3.40196	20.16	93.5364	10.5614	21.04	66.5455	14.4403	21.07	61.12	19.3035	21.03	60.13	21.2576	21.11
2013-12-23	11:30:00	2013-12-23 11:30:00	61.5	2.9918	20.09	58.8231	3.35671	20.27	95.6364	10.1313	21.11	70.3455	15.2292	21	64.22	19.1528	21.11	60.13	20.9593	21.17
2013-12-23	11:45:00	2013-12-23 11:45:00	68.9	3.06026	20.32	67.4231	3.77288	20.51	101.036	9.98302	21.15	75.1455	18.6575	20.73	72.72	19.1254	21.22	69.13	20.8435	21.27
2013-12-23	12:00:00	2013-12-23 12:00:00	69.8	3.35671	20.59	73.4231	5.46714	20.56	104.036	11.9734	21.03	77.9455	19.6684	20.71	73.62	19.5339	21.32	74.03	20.8738	21.24
2013-12-23	12:15:00	2013-12-23 12:15:00	75.1	3.7873	20.7	73.5231	7.30432	20.6	108.036	13.6228	20.91	84.9455	20.4135	20.75	75.12	20.5265	21.37	74.03	21.0615	21.2
2013-12-23	12:30:00	2013-12-23 12:30:00	80.9	4.94433	20.9	73.5231	9.68447	21.07	113.336	17.1046	21.07	91.4455	20.4962	21.01	82.02	22.0932	21.33	79.33	21.4289	20.96
2013-12-23	12:45:00	2013-12-23 12:45:00	82.4	6.83415	21.11	78.3231	11.2105	21.13	119.336	19.2323	21.26	94.0455	22.0738	20.92	86.72	23.6634	21.18	86.23	21.7636	20.92
2013-12-23	13:00:00	2013-12-23 13:00:00	90.8	10.8594	21.17	88.4231	18.0786	20.83	124.736	21.067	21.18	100.845	23.9924	21.01	91.32	24.0454	21.04	100.73	22.1459	20.95
2013-12-23	13:15:00	2013-12-23 13:15:00	92.7	14.5394	21.04	94.1231	19.6986	20.99	131.436	23.3375	21.04	107.145	24.6767	20.83	98.22	23.8334	21.04	94.63	22.4759	21.01
2013-12-23	13:30:00	2013-12-23 13:30:00	99.2	16.9526	21.03	98.6231	21.0145	20.91	134.336	24.1068	20.87	110.145	24.8613	20.81	101.32	24.0175	21.07	101.23	22.7563	20.97
2013-12-23	13:45:00	2013-12-23 13:45:00	101.4	18.6711	20.89	104.123	21.8633	20.8	137.636	24.3888	20.84	117.445	25.018	20.83	106.92	24.6963	21.05	104.53	23.0232	20.94
2013-12-23	14:00:00	2013-12-23 14:00:00	105.7	19.7425	20.88	101.323	21.9879	20.88	139.136	24.5537	20.86	124.145	25.0936	20.85	111.22	24.2883	21.03	110.83	23.2707	20.91
2013-12-23	14:15:00	2013-12-23 14:15:00	108.2	20.4493	20.97	102.823	22.4315	20.96	143.236	24.6348	20.88	117.845	25.1384	20.84	108.42	24.6208	21.02	111.63	23.5213	20.85
2013-12-23	14:30:00	2013-12-23 14:30:00	112.7	21.0063	21	113.823	22.5342	20.97	145.736	24.8082	20.86	123.445	25.4999	20.78	115.62	24.6851	20.99	120.03	23.8139	20.74
2013-12-23	14:45:00	2013-12-23 14:45:00	124.9	21.404	20.99	117.823	22.8397	20.98	157.036	25.2224	20.76	131.545	26.0807	20.72	119.52	25.441	20.8	125.03	24.1459	20.63
2013-12-23	15:00:00	2013-12-23 15:00:00	121	21.7664	20.97	121.923	23.3125	20.93	161.436	25.887	20.67	140.345	26.7133	20.57	130.22	25.9039	20.68	128.83	24.4475	20.58
2013-12-23	15:15:00	2013-12-23 15:15:00	134.8	22.2623	20.83	123.123	24.0175	20.77	164.736	26.418	20.5	139.645	26.9329	20.43	126.32	26.8456	20.62	131.33	24.7047	20.55
2013-12-23	15:30:00	2013-12-23 15:30:00	128.7	22.773	20.69	124.123	24.3246	20.66	169.736	26.5192	20.41	147.445	27.0794	20.36	134.02	26.1847	20.6	134.53	24.9648	20.53
2013-12-23	15:45:00	2013-12-23 15:45:00	131.4	23.1427	20.62	134.223	24.495	20.6	175.836	26.7612	20.34	145.245	27.2766	20.31	139.62	26.0555	20.57	141.93	25.2168	20.45
2013-12-23	16:00:00	2013-12-23 16:00:00	141.3	23.4433	20.57	135.423	24.5593	20.56	171.736	26.9667	20.29	143.545	27.4881	20.28	142.72	25.9095	20.53	137.13	25.4774	20.39
2013-12-23	16:15:00	2013-12-23 16:15:00	137.8	23.6132	20.55	135.023	24.6459	20.53	178.036	27.1554	20.27	146.345	27.5784	20.26	137.02	26.6627	20.47	140.23	25.6709	20.36
2013-12-23	16:30:00	2013-12-23 16:30:00	139.5	23.7832	20.53	139.623	24.6851	20.51	172.236	27.2315	20.26	149.845	27.7025	20.24	139.12	26.7865	20.44	141.03	25.8533	20.34
2013-12-23	16:45:00	2013-12-23 16:45:00	138	23.9032	20.51	137.123	24.7634	20.49	180.136	27.3894	20.23	154.145	27.8691	20.22	145.82	26.6599	20.4	148.63	26.0442	20.32
2013-12-23	17:00:00	2013-12-23 17:00:00	140.2	24.0705	20.48	140.223	24.9173	20.46	177.436	27.4966	20.21	155.445	27.9143	20.21	144.82	26.1875	20.37	146.93	26.21	20.29
2013-12-23	17:15:00	2013-12-23 17:15:00	140.7	24.1515	20.46	144.823	25.5503	20.37	182.836	27.5389	20.19	154.545	27.903	20.2	148.62	26.7555	20.35	150.83	26.3702	20.26
2013-12-23	17:30:00	2013-12-23 17:30:00	148.4	24.3274	20.4	144.023	25.7299	20.32	178.836	27.5671	20.18	154.845	27.9228	20.19	143.32	26.8372	20.32	149.53	26.4855	20.25
2013-12-23	17:45:00	2013-12-23 17:45:00	145.5	24.5397	20.35	141.923	25.8365	20.29	179.336	27.6207	20.17	151.645	27.999	20.18	145.72	26.8991	20.3	145.33	26.6233	20.23
2013-12-23	18:00:00	2013-12-23 18:00:00	136.6	24.7718	20.3	135.023	25.6064	20.32	172.436	27.6461	20.17	151.145	28.064	20.18	140.12	26.9132	20.29	141.73	26.733	20.22
2013-12-23	18:15:00	2013-12-23 18:15:00	140.3	24.9397	20.28	134.923	25.814	20.31	171.336	27.6687	20.17	147.645	27.9651	20.19	139.12	27.2851	20.3	138.13	26.809	20.27
2013-12-23	18:30:00	2013-12-23 18:30:00	137.3	25.0488	20.28	135.423	25.9403	20.27	168.936	27.6461	20.19	146.145	27.9679	20.19	137.02	26.8709	20.33	139.53	26.8569	20.32
2013-12-23	18:45:00	2013-12-23 18:45:00	130.1	25.0936	20.29	127.623	25.7411	20.3	163.936	27.6292	20.2	142.245	27.9849	20.21	132.42	26.8006	20.36	134.03	26.885	20.36
2013-12-23	19:00:00	2013-12-23 19:00:00	128.8	25.0796	20.36	127.223	25.7046	20.33	164.536	27.5586	20.26	139.645	27.9199	20.25	132.42	26.8569	20.41	134.73	26.9019	20.4
2013-12-23	19:15:00	2013-12-23 19:15:00	130.1	24.9872	20.41	130.123	25.2645	20.38	167.236	27.5191	20.28	141.145	27.9143	20.25	131.12	26.5276	20.47	136.33	26.9385	20.44
2013-12-23	19:30:00	2013-12-23 19:30:00	127.6	24.8809	20.48	129.723	25.1132	20.46	163.036	27.4937	20.28	139.545	27.5812	20.34	132.22	26.4011	20.53	129.83	26.9329	20.49
2013-12-23	19:45:00	2013-12-23 19:45:00	128	24.7354	20.59	123.723	24.9117	20.56	159.236	27.3838	20.33	138.045	27.4853	20.39	131.52	26.283	20.56	129.33	26.8963	20.53
2013-12-23	20:00:00	2013-12-23 20:00:00	120.4	24.6152	20.65	119.023	24.7047	20.64	160.036	27.1498	20.41	132.245	27.0765	20.46	122.02	26.2577	20.59	123.73	26.8625	20.58
2013-12-23	20:15:00	2013-12-23 20:15:00	122.9	24.4503	20.68	117.923	24.2436	20.7	152.836	26.4461	20.62	125.545	27.333	20.45	121.72	26.1397	20.62	120.03	26.7893	20.62
2013-12-23	20:30:00	2013-12-23 20:30:00	115	24.2939	20.7	116.023	24.3078	20.71	152.336	26.3561	20.65	124.245	26.9611	20.55	118.92	25.9853	20.66	117.53	26.7555	20.65
2013-12-23	20:45:00	2013-12-23 20:45:00	108	24.0426	20.74	107.823	22.748	20.82	146.436	26.0527	20.73	119.045	25.6934	20.87	112.92	25.9235	20.7	117.03	26.6824	20.66
2013-12-23	21:00:00	2013-12-23 21:00:00	105.5	23.853	20.79	104.323	20.0118	20.91	141.836	26.1369	20.7	116.645	25.1748	21.03	109.42	25.7355	20.76	106.73	26.612	20.73
2013-12-23	21:15:00	2013-12-23 21:15:00	105.5	23.6132	20.89	102.523	22.0793	20.89	138.736	24.6795	21.08	113.745	25.1636	21.03	104.92	25.4774	20.84	108.63	26.4601	20.88
2013-12-23	21:30:00	2013-12-23 21:30:00	98.7	23.2791	20.98	97.3231	21.3957	20.93	135.336	24.0175	21.19	107.945	25.2953	21.02	103.12	25.2813	20.88	103.23	26.3083	20.99
2013-12-23	21:45:00	2013-12-23 21:45:00	98	22.1209	21.04	94.0231	22.6425	20.92	134.736	22.937	21.27	109.245	24.9229	20.99	99.92	25.1048	20.93	103.23	26.151	21.05
2013-12-23	22:00:00	2013-12-23 22:00:00	92	21.5533	20.97	88.7231	19.7645	20.92	129.636	22.4121	21.31	103.545	24.9369	21	98.12	25.1104	20.96	94.53	25.8814	21.08
2013-12-23	22:15:00	2013-12-23 22:15:00	86.4	20.386	20.9	82.8231	19.501	20.91	123.036	21.7913	21.37	95.7455	23.9087	21.09	89.02	25.0348	20.97	89.43	25.6289	21.12
2013-12-23	22:30:00	2013-12-23 22:30:00	83.1	18.7586	20.78	80.7231	20.78	20.82	118.236	19.1418	21.45	92.1455	23.4573	21.17	85.62	24.9592	20.99	88.23	25.032	21.15
2013-12-23	22:45:00	2013-12-23 22:45:00	77.9	16.9309	20.66	77.3231	21.0477	20.81	114.436	17.9042	21.46	89.0455	22.8453	21.2	81.42	24.9089	21.01	81.23	24.3832	21.22
2013-12-23	23:00:00	2013-12-23 23:00:00	74.6	14.4429	20.54	72.7231	19.5559	20.84	110.436	16.2864	21.4	84.0455	23.4573	21.17	77.92	24.5956	21.05	79.23	23.6941	21.22
2013-12-23	23:15:00	2013-12-23 23:15:00	73.7	13.5455	20.49	71.5231	20.4521	20.83	108.936	11.7494	21.15	84.7455	23.1288	21.17	78.72	19.9074	21.19	76.43	23.0426	21.22
2013-12-23	23:30:00	2013-12-23 23:30:00	70.5	12.4251	20.46	68.4231	21.7691	20.85	106.936	11.8811	21.06	81.2455	23.4545	21.16	75.42	17.7489	21.25	73.53	22.315	21.21
2013-12-23	23:45:00	2013-12-23 23:45:00	69.6	11.5494	20.42	68.2231	22.3677	20.85	106.336	12.2295	21.01	81.8455	25.0208	21.01	74.32	16.1728	21.26	74.23	21.6778	21.2
2013-12-24	00:00:00	2013-12-24	68.1	13.0959	20.59	64.8231	22.5564	20.81	104.136	11.5388	20.87	76.9455	25.5363	20.83	74.32	15.0196	21.24	74.03	20.9593	21.2
2013-12-24	00:15:00	2013-12-24 00:15:00	69.4	14.4456	20.67	67.9231	23.747	20.78	104.536	9.89728	20.6	81.4455	26.0723	20.73	71.42	13.6334	21.12	75.53	20.6973	21.13
2013-12-24	00:30:00	2013-12-24 00:30:00	69.8	17.2893	20.77	69.1231	24.2408	20.75	105.636	9.20577	20.42	82.5455	26.2268	20.71	73.02	12.8888	21	77.93	20.6449	21.06
2013-12-24	00:45:00	2013-12-24 00:45:00	72.4	19.4982	20.76	71.8231	24.4056	20.75	107.336	8.97103	20.34	83.8455	26.2296	20.73	72.42	13.064	20.84	77.93	20.8242	20.95
2013-12-24	01:00:00	2013-12-24 01:00:00	74.2	20.7083	20.73	72.3231	24.6264	20.74	109.236	20.7332	20.81	86.4455	26.0695	20.75	76.22	14.9363	20.59	77.43	21.0974	20.89
2013-12-24	01:15:00	2013-12-24 01:15:00	75.9	21.4427	20.7	74.7231	25.1076	20.63	112.036	21.7	20.87	87.9455	26.8259	20.68	80.02	17.5448	20.58	83.13	21.4234	20.85
2013-12-24	01:30:00	2013-12-24 01:30:00	80.7	21.9491	20.64	78.7231	25.4971	20.48	115.936	22.6036	20.85	91.0455	26.7921	20.59	83.52	18.2969	20.42	83.93	21.7276	20.83
2013-12-24	01:45:00	2013-12-24 01:45:00	81.8	22.3261	20.52	82.9231	25.685	20.43	117.336	22.6536	20.83	92.1455	25.7327	20.52	86.02	18.9775	20.33	87.83	22.0018	20.79
2013-12-24	02:00:00	2013-12-24 02:00:00	86.1	22.9008	20.44	83.3231	25.9488	20.38	119.236	21.6197	20.64	95.6455	25.5784	20.41	86.32	17.9423	20.2	87.43	22.2235	20.76
2013-12-24	02:15:00	2013-12-24 02:15:00	87.9	23.2624	20.38	87.6231	26.019	20.36	122.436	21.5284	20.5	96.0455	26.8287	20.47	88.82	16.7899	20.08	90.23	22.3954	20.69
2013-12-24	02:30:00	2013-12-24 02:30:00	90.4	23.5714	20.34	90.0231	26.092	20.36	124.836	20.9566	20.34	101.045	27.2456	20.49	95.02	15.838	19.95	94.13	22.2512	20.45
2013-12-24	02:45:00	2013-12-24 02:45:00	89.5	23.7386	20.31	90.0231	26.1482	20.36	126.236	19.5833	20.16	102.945	26.1116	20.51	92.32	14.9874	19.87	92.53	22.2512	20.46
2013-12-24	03:00:00	2013-12-24 03:00:00	93.3	23.8585	20.3	91.5231	26.1622	20.35	128.336	19.1939	19.76	103.845	26.3814	20.52	96.12	14.2743	19.76	100.93	22.401	20.61
2013-12-24	03:15:00	2013-12-24 03:15:00	100.7	23.8418	20.28	96.5231	26.1369	20.35	133.836	18.9283	19.7	109.945	26.387	20.51	100.92	16.2782	19.71	105.83	22.5259	20.65
2013-12-24	03:30:00	2013-12-24 03:30:00	107.8	23.5297	20.23	103.523	26.1482	20.32	136.736	19.586	19.72	114.445	25.1076	20.42	105.32	20.8242	20.01	108.43	22.648	20.57
2013-12-24	03:45:00	2013-12-24 03:45:00	105.9	23.4461	20.21	103.723	26.0218	20.3	143.236	19.2789	19.69	120.545	22.9175	19.93	113.52	20.9097	19.87	113.23	22.6758	20.28
2013-12-24	04:00:00	2013-12-24 04:00:00	112.7	22.5675	20.08	112.423	25.7467	20.26	146.836	18.6165	19.67	124.445	21.7498	19.87	111.42	19.4927	19.74	111.83	22.7202	20.25
2013-12-24	04:15:00	2013-12-24 04:15:00	108.4	23.0176	20.14	109.423	25.8028	20.24	145.736	18.5591	19.65	123.845	20.0998	19.76	114.32	18.3406	19.67	116.83	22.6675	20.18
2013-12-24	04:30:00	2013-12-24 04:30:00	111.2	23.5464	20.19	109.823	26.1482	20.24	147.336	16.1917	19.49	122.245	19.3638	19.73	116.02	17.0992	19.57	114.43	22.3344	19.92
2013-12-24	04:45:00	2013-12-24 04:45:00	112.3	24.0175	20.2	111.923	26.2858	20.23	146.836	16.4027	19.47	124.645	18.9857	19.7	114.12	14.031	19.4	116.33	21.9187	19.77
2013-12-24	05:00:00	2013-12-24 05:00:00	108.9	24.3497	20.21	106.123	26.2549	20.23	144.636	16.798	19.52	121.645	19.1555	19.7	116.82	13.8895	19.37	116.13	21.5699	19.74
2013-12-24	05:15:00	2013-12-24 05:15:00	106.2	24.5816	20.22	103.723	26.2268	20.23	142.236	16.8197	19.52	117.945	19.1144	19.67	109.12	15.7841	19.41	114.33	21.1995	19.78
2013-12-24	05:30:00	2013-12-24 05:30:00	102.8	24.8389	20.22	102.523	26.2634	20.23	138.736	16.8604	19.54	113.845	18.8079	19.65	110.12	15.9702	19.47	109.33	20.8628	19.77
2013-12-24	05:45:00	2013-12-24 05:45:00	100	25.0264	20.22	99.0231	26.1987	20.22	136.936	17.5095	19.59	110.345	18.7915	19.64	104.12	15.5873	19.48	106.03	20.4686	19.71
2013-12-24	06:00:00	2013-12-24 06:00:00	97.2	25.172	20.21	94.1231	26.1538	20.22	133.836	18.734	19.69	107.745	19.224	19.68	101.42	16.2837	19.5	103.43	20.1081	19.65
2013-12-24	06:15:00	2013-12-24 06:15:00	91.9	25.1972	20.19	88.5231	26.2577	20.21	127.336	19.0953	19.71	104.945	19.2432	19.73	96.12	16.6246	19.43	96.23	19.5147	19.31
2013-12-24	06:30:00	2013-12-24 06:30:00	90.9	24.8193	20.1	89.3231	26.3505	20.19	125.736	17.8906	19.58	99.3455	18.7969	19.67	95.72	17.4306	19.39	97.83	19.1994	19.28
2013-12-24	06:45:00	2013-12-24 06:45:00	87.2	24.2939	20.05	86.2231	26.3336	20.18	123.036	17.2702	19.45	98.4455	19.309	19.71	89.92	17.6809	19.37	91.93	18.8954	19.23
2013-12-24	07:00:00	2013-12-24 07:00:00	82.7	23.2429	19.92	79.0231	26.3252	20.18	118.936	15.0841	19.2	93.8455	16.5569	19.4	87.72	17.6999	19.32	86.03	18.6383	19.19
2013-12-24	07:15:00	2013-12-24 07:15:00	79.4	22.0073	19.84	77.5231	26.3168	20.18	116.036	14.459	19.1	89.9455	16.2782	19.3	84.22	17.5775	19.3	85.63	18.4334	19.17
2013-12-24	07:30:00	2013-12-24 07:30:00	76.9	18.7997	19.72	73.9231	26.283	20.14	112.936	13.5561	19	86.2455	16.446	19.25	80.22	16.9662	19.24	82.73	18.2396	19.12
2013-12-24	07:45:00	2013-12-24 07:45:00	72.3	15.8731	19.63	68.9231	26.2606	20.14	108.336	13.3272	18.99	81.8455	15.1083	19.09	77.22	16.4838	19.18	76.63	18.0132	19.05
2013-12-24	08:00:00	2013-12-24 08:00:00	69.1	14.7646	19.72	65.5231	26.1791	20.11	103.936	13.2952	18.97	77.3455	14.451	18.95	70.92	16.2999	19.16	71.93	17.7598	19
2013-12-24	08:15:00	2013-12-24 08:15:00	63.6	13.0427	19.72	60.7231	26.1201	20.09	100.636	13.2075	18.94	73.0455	14.5447	18.85	70.32	17.7489	19.34	67.53	17.5339	19
2013-12-24	08:30:00	2013-12-24 08:30:00	60.1	10.76	19.61	56.9231	26.1678	20.04	95.8364	12.6051	18.82	69.1455	13.7641	18.71	62.42	17.9696	19.42	62.93	17.4632	19.12
2013-12-24	08:45:00	2013-12-24 08:45:00	56.3	9.03805	19.5	52.2231	26.2212	20.09	91.6364	12.3854	18.82	66.0455	14.4081	18.62	60.72	18.2041	19.43	58.33	17.3626	19.15
2013-12-24	09:00:00	2013-12-24 09:00:00	52.2	7.91715	19.46	47.5231	25.901	20.13	87.8364	12.5945	18.88	60.2455	13.9803	18.66	54.82	17.7707	19.4	54.43	17.3137	19.14
2013-12-24	09:15:00	2013-12-24 09:15:00	48.6	6.86693	19.43	44.1231	25.0572	20.06	84.4364	12.6687	18.84	56.9455	13.8922	18.69	51.62	17.3028	19.37	50.53	17.2893	19.11
2013-12-24	09:30:00	2013-12-24 09:30:00	45.7	5.67046	19.4	40.2231	23.2151	19.98	81.3364	12.7164	18.76	52.8455	13.7427	18.7	46.62	16.8631	19.3	46.73	17.2947	19.08
2013-12-24	09:45:00	2013-12-24 09:45:00	43	4.47223	19.39	38.7231	12.1027	19.69	78.9364	12.5521	18.78	51.0455	13.3538	18.7	47.12	16.3026	19.25	44.23	17.2838	19.05
2013-12-24	10:00:00	2013-12-24 10:00:00	40.5	3.59541	19.44	35.2231	4.20491	19.41	76.3364	12.0895	18.92	47.9455	12.9233	18.76	43.32	16.1458	19.23	42.03	17.2974	19.02
2013-12-24	10:15:00	2013-12-24 10:15:00	37.8	3.05081	19.51	32.1231	2.91641	19.44	73.4364	11.8152	19	45.1455	12.0262	18.91	42.62	16.0729	19.22	38.83	17.2893	19
2013-12-24	10:30:00	2013-12-24 10:30:00	35.7	2.68653	19.58	28.7231	4.02102	19.54	71.4364	10.3839	19.14	41.2455	11.3102	19.04	40.82	15.981	19.18	34.13	17.2811	18.97
2013-12-24	10:45:00	2013-12-24 10:45:00	32.3	2.4327	19.63	24.5231	2.73566	19.55	67.9364	8.72906	19.25	38.2455	10.6005	19.13	36.52	15.7274	19.12	32.03	17.2404	18.97
2013-12-24	11:00:00	2013-12-24 11:00:00	30.5	2.23161	19.61	21.9231	2.08003	19.52	64.8364	7.87124	19.3	34.9455	9.57303	19.21	33.82	15.5576	19.07	28.33	17.1562	19
2013-12-24	11:15:00	2013-12-24 11:15:00	28.5	2.06171	19.54	21.0231	1.96578	19.48	63.4364	7.24351	19.36	33.5455	8.93496	19.27	33.02	15.2535	19.05	27.43	17.0856	19.02
2013-12-24	11:30:00	2013-12-24 11:30:00	26.4	1.92706	19.52	18.3231	1.89067	19.5	60.2364	6.16132	19.42	32.2455	7.57337	19.38	29.22	15.111	19.05	25.73	16.9553	19.05
2013-12-24	11:45:00	2013-12-24 11:45:00	25.3	1.81579	19.53	16.0231	1.8498	19.47	58.9364	5.30639	19.48	29.6455	6.58495	19.48	29.22	14.931	19.07	23.93	16.8089	19.09
2013-12-24	12:00:00	2013-12-24 12:00:00	23.3	1.72537	19.57	14.5231	1.89067	19.47	58.7364	4.17099	19.5	27.7455	5.66053	19.52	24.82	14.2422	19.1	21.23	16.6544	19.12
2013-12-24	12:15:00	2013-12-24 12:15:00	22.3	1.60167	19.59	15.8231	1.78184	19.55	55.5364	3.36861	19.51	27.9455	5.14851	19.53	24.42	12.7933	19.22	21.23	16.4162	19.1
2013-12-24	12:30:00	2013-12-24 12:30:00	21.4	1.50995	19.63	13.8231	1.76602	19.62	54.4364	2.87173	19.55	28.3455	4.24371	19.57	24.82	10.6685	19.36	20.83	16.1593	19.13
2013-12-24	12:45:00	2013-12-24 12:45:00	20.5	1.56359	19.79	14.5231	1.83165	19.68	54.4364	2.56052	19.62	26.8455	3.57387	19.62	18.92	8.41071	19.5	21.33	15.5038	19.34
2013-12-24	13:00:00	2013-12-24 13:00:00	20.3	1.56135	19.86	16.3231	1.80673	19.73	52.7364	2.3031	19.66	29.0455	3.52605	19.66	21.22	7.52	19.54	22.93	15.0169	19.4
2013-12-24	13:15:00	2013-12-24 13:15:00	20.8	1.62635	19.93	15.3231	1.79089	19.72	54.0364	2.03884	19.68	29.4455	3.49977	19.67	22.02	4.79471	19.62	22.53	14.3412	19.52
2013-12-24	13:30:00	2013-12-24 13:30:00	20.8	1.62635	20.04	18.1231	1.82032	19.73	53.5364	1.53451	19.7	31.2455	3.69845	19.68	20.82	3.42579	19.7	24.63	13.6094	19.61
2013-12-24	13:45:00	2013-12-24 13:45:00	22.1	1.51441	19.95	17.8231	1.84072	19.73	55.5364	1.37654	19.71	34.4455	3.538	19.71	23.72	3.18805	19.75	27.23	12.5707	19.7
2013-12-24	14:00:00	2013-12-24 14:00:00	22.8	1.4409	19.78	18.8231	1.87703	19.67	56.5364	1.27055	19.73	33.1455	3.21176	19.81	22.92	3.75126	19.75	28.33	11.5967	19.78
2013-12-24	14:15:00	2013-12-24 14:15:00	25.8	1.37211	19.76	24.4231	1.87476	19.68	59.9364	1.23318	19.71	37.7455	3.66248	19.8	26.12	3.93897	19.78	31.73	10.7521	19.81
2013-12-24	14:30:00	2013-12-24 14:30:00	27.5	1.20686	19.65	25.2231	1.90431	19.66	60.6364	1.43423	19.69	38.2455	5.01314	19.77	25.42	3.60259	19.78	32.33	10.061	19.79
2013-12-24	14:45:00	2013-12-24 14:45:00	30.8	1.21563	19.63	29.3231	2.01827	19.65	63.4364	3.42579	19.72	43.8455	6.10884	19.75	30.22	4.15404	19.76	38.13	9.78564	19.68
2013-12-24	15:00:00	2013-12-24 15:00:00	35.7	1.29478	19.63	35.9231	2.51165	19.48	67.1364	4.86334	19.75	49.7455	6.92495	19.74	35.32	6.36909	19.73	43.23	9.66373	19.59
2013-12-24	15:15:00	2013-12-24 15:15:00	42.5	1.46537	19.65	42.9231	14.162	19.9	72.9364	6.08386	19.78	55.8455	6.95777	19.7	42.02	8.20072	19.67	48.63	9.5549	19.58
2013-12-24	15:30:00	2013-12-24 15:30:00	45.9	2.09836	19.62	46.0231	19.9431	20.34	79.2364	6.65536	19.79	59.8455	9.37633	19.77	46.82	8.93238	19.61	52.13	9.53159	19.55
2013-12-24	15:45:00	2013-12-24 15:45:00	52.5	3.49499	19.6	51.8231	17.5992	20.21	86.4364	7.02343	19.74	66.2455	15.8083	19.87	55.82	9.11801	19.56	59.63	9.49794	19.56
2013-12-24	16:00:00	2013-12-24 16:00:00	57.9	5.83454	19.64	56.9231	15.3584	20.05	91.3364	7.13214	19.71	69.5455	19.8442	19.87	58.82	9.10511	19.51	62.93	9.57822	19.49
2013-12-24	16:15:00	2013-12-24 16:15:00	62.6	7.70819	19.68	61.4231	14.9498	19.9	97.0364	7.18781	19.65	74.7455	19.6135	19.82	64.02	9.57044	19.38	68.73	9.65077	19.47
2013-12-24	16:30:00	2013-12-24 16:30:00	66.2	9.36857	19.71	63.9231	14.8639	19.75	101.236	11.8152	19.48	78.6455	19.4818	19.73	69.92	10.3761	19.34	71.33	10.0324	19.6
2013-12-24	16:45:00	2013-12-24 16:45:00	69.9	10.5483	19.64	66.8231	14.6278	19.62	104.836	13.0268	19.5	81.4455	19.1501	19.64	72.02	13.0056	19.37	75.73	10.4648	19.56
2013-12-24	17:00:00	2013-12-24 17:00:00	74.8	11.5125	19.5	73.4231	14.6305	19.52	108.936	14.3921	19.53	84.9455	19.6135	19.49	74.82	15.4822	19.35	79.63	10.9562	19.43
2013-12-24	17:15:00	2013-12-24 17:15:00	78.7	12.1212	19.4	75.8231	14.9981	19.46	111.936	15.2346	19.52	89.2455	19.2268	19.37	78.92	16.0945	19.27	81.23	11.5231	19.15
2013-12-24	17:30:00	2013-12-24 17:30:00	80.9	12.6422	19.25	79.6231	15.1405	19.23	115.736	15.6196	19.48	92.5455	19.1966	19.3	82.72	16.6788	19.08	84.63	12.0631	19.05
2013-12-24	17:45:00	2013-12-24 17:45:00	83.6	13.1995	19.12	81.2231	15.5738	19.02	117.836	15.9082	19.42	93.4455	18.8735	19.25	84.62	17.0069	18.92	86.63	12.5495	18.87
2013-12-24	18:00:00	2013-12-24 18:00:00	84.5	13.7267	19.01	82.2231	16.1809	18.85	119.836	16.2891	19.39	95.6455	19.0761	19.14	89.62	16.7899	18.71	89.03	12.9684	18.84
2013-12-24	18:15:00	2013-12-24 18:15:00	85.9	14.1887	18.85	84.3231	16.6273	18.78	120.836	16.7059	19.46	95.1455	18.6192	18.88	87.32	16.4	18.53	89.53	13.3112	18.7
2013-12-24	18:30:00	2013-12-24 18:30:00	87.7	14.5876	18.79	86.4231	16.7411	18.73	120.836	17.0422	19.44	96.9455	18.275	18.7	88.32	16.2512	18.42	89.43	13.5721	18.57
2013-12-24	18:45:00	2013-12-24 18:45:00	85.2	14.9417	18.78	82.2231	16.4243	18.6	118.936	17.2811	19.51	95.1455	17.926	18.64	86.22	16.1107	18.31	87.73	13.7907	18.44
2013-12-24	19:00:00	2013-12-24 19:00:00	81.1	15.2212	18.78	79.6231	16.7113	18.67	116.936	17.2078	19.5	92.1455	17.8606	18.65	84.82	15.9837	18.23	84.43	13.9456	18.23
2013-12-24	19:15:00	2013-12-24 19:15:00	79.4	15.4068	18.78	78.0231	16.7167	18.72	114.736	17.553	19.5	91.4455	18.2532	18.7	81.02	15.0411	18.13	83.73	14.0658	18.11
2013-12-24	19:30:00	2013-12-24 19:30:00	77.6	15.5927	18.84	74.2231	16.8387	18.76	111.836	17.7598	19.47	87.1455	18.5399	18.72	79.32	13.9562	18.04	80.13	14.1647	18.06
2013-12-24	19:45:00	2013-12-24 19:45:00	73.9	14.6358	18.75	71.0231	16.9146	18.74	109.336	17.8361	19.44	84.5455	18.3487	18.74	77.72	13.0348	17.99	77.43	14.2342	18.04
2013-12-24	20:00:00	2013-12-24 20:00:00	71.9	11.889	18.5	69.2231	16.9933	18.75	107.036	17.7517	19.3	81.9455	17.8007	18.76	75.12	12.1872	17.99	75.93	14.3011	18.04
2013-12-24	20:15:00	2013-12-24 20:15:00	68.5	11.1843	18.49	66.7231	16.9797	18.75	103.836	10.9353	18.84	78.4455	17.5693	18.77	71.62	11.4284	18	71.93	14.3626	18.05
2013-12-24	20:30:00	2013-12-24 20:30:00	66.4	10.7573	18.55	63.1231	16.9445	18.74	101.236	6.15382	17.69	75.8455	17.5965	18.78	68.82	10.9772	18.04	69.43	14.4135	18.06
2013-12-24	20:45:00	2013-12-24 20:45:00	64	10.5744	18.66	60.5231	16.9011	18.74	98.8364	4.9689	17.41	73.6455	17.072	18.49	66.12	10.1443	18.04	66.13	14.4429	18.04
2013-12-24	21:00:00	2013-12-24 21:00:00	62.1	10.3136	18.72	60.2231	16.9092	18.75	97.0364	4.47223	17.41	72.8455	17.3572	18.69	64.32	7.79987	17.92	66.13	14.4804	18.01
2013-12-24	21:15:00	2013-12-24 21:15:00	60.4	9.98562	18.75	57.1231	16.7411	18.77	95.3364	6.15132	17.75	69.3455	17.4306	18.82	63.22	6.89468	17.86	63.43	14.4938	18.01
2013-12-24	21:30:00	2013-12-24 21:30:00	58.6	9.65336	18.8	56.4231	16.4703	18.79	93.9364	5.77981	17.83	68.6455	18.0868	18.9	61.32	6.36408	17.81	61.73	14.5045	18.01
2013-12-24	21:45:00	2013-12-24 21:45:00	55.6	8.87315	18.69	52.7231	16.4893	18.8	91.1364	5.71766	17.82	65.3455	18.0732	18.96	59.02	5.9591	17.77	59.63	14.5099	18.06
2013-12-24	22:00:00	2013-12-24 22:00:00	53.1	7.80497	18.75	49.5231	16.7195	18.81	88.4364	6.03643	17.92	62.3455	17.4387	18.92	55.92	5.6233	17.71	55.73	14.526	18.08
2013-12-24	22:15:00	2013-12-24 22:15:00	50.9	6.46189	18.8	47.5231	16.7926	18.83	86.0364	6.11134	17.95	59.8455	14.778	18.56	53.72	5.38053	17.62	53.53	14.5179	18.14
2013-12-24	22:30:00	2013-12-24 22:30:00	48.4	5.6233	18.82	44.6231	16.8143	18.85	83.4364	6.25137	18.02	57.3455	10.4465	18.12	51.02	5.18548	17.54	51.23	14.5367	18.18
2013-12-24	22:45:00	2013-12-24 22:45:00	45.9	5.00822	18.78	42.4231	16.5596	18.84	80.7364	6.25137	17.91	55.4455	9.19028	17.72	48.52	5.06479	17.48	48.23	14.5474	18.19
2013-12-24	23:00:00	2013-12-24 23:00:00	43.4	4.4771	18.72	39.7231	16.5976	18.83	78.5364	6.15382	17.91	52.8455	9.08447	17.8	46.42	5.24221	17.4	46.13	14.5554	18.19
2013-12-24	23:15:00	2013-12-24 23:15:00	41.2	3.9848	18.66	38.0231	16.1701	18.78	76.3364	6.09385	17.88	50.4455	8.36201	17.5	44.12	5.61089	17.37	44.03	14.5608	18.19
2013-12-24	23:30:00	2013-12-24 23:30:00	39.7	3.3829	18.58	36.2231	15.5038	18.69	74.1364	6.11883	17.83	49.0455	8.40302	17	42.82	5.6655	17.32	42.53	14.5554	18.2
2013-12-24	23:45:00	2013-12-24 23:45:00	37.3	2.73098	18.47	32.3231	11.976	18.43	72.1364	6.15132	17.76	45.7455	8.33127	16.8	40.32	5.53402	17.23	39.43	14.5662	18.21
2013-12-25	00:00:00	2013-12-25	35.3	2.07774	18.35	30.8231	7.7642	18.32	70.5364	6.15632	17.71	43.8455	7.84065	16.76	38.62	5.38795	17.15	37.13	14.5769	18.17
2013-12-25	00:15:00	2013-12-25 00:15:00	33.2	1.64207	18.3	28.3231	2.40951	17.81	68.3364	6.06888	17.75	41.2455	7.48952	16.93	36.52	5.43496	17.09	34.43	14.5715	18.15
2013-12-25	00:30:00	2013-12-25 00:30:00	31.2	1.33892	18.31	26.9231	2.13505	17.83	66.3364	6.00399	17.73	39.4455	7.31953	16.84	34.22	5.6953	17.03	32.73	14.5769	18.11
2013-12-25	00:45:00	2013-12-25 00:45:00	30	1.13689	18.29	25.1231	3.20465	17.89	64.2364	5.85944	17.71	38.3455	7.03607	16.42	33.02	6.52214	16.97	31.33	14.5822	18.11
2013-12-25	01:00:00	2013-12-25 01:00:00	28.3	0.985074	18.25	23.9231	2.58382	17.81	62.6364	5.63074	17.66	36.4455	6.88459	16.47	30.72	7.46921	16.95	29.13	14.5715	18.05
2013-12-25	01:15:00	2013-12-25 01:15:00	27.1	0.864954	18.17	23.3231	2.36089	17.68	61.1364	4.94679	17.54	35.9455	6.42927	16.75	30.02	7.60133	17.01	28.83	14.5769	17.87
2013-12-25	01:30:00	2013-12-25 01:30:00	26.8	0.769388	18.06	23.1231	2.01598	17.59	60.6364	4.28011	17.47	35.5455	6.84424	16.84	29.02	7.61914	16.94	28.83	14.5662	17.82
2013-12-25	01:45:00	2013-12-25 01:45:00	28	0.691519	17.98	25.9231	1.9225	17.47	61.0364	3.83058	17.38	38.5455	7.33981	17.38	30.02	7.32713	16.83	31.33	14.534	17.74
2013-12-25	02:00:00	2013-12-25 02:00:00	29.4	0.626816	17.91	27.1231	1.43423	17.31	62.2364	3.1383	17.38	39.4455	12.7694	18.15	30.42	7.03354	16.72	32.43	14.4322	17.4
2013-12-25	02:15:00	2013-12-25 02:15:00	30.9	0.58122	17.8	28.6231	1.31242	17.13	64.2364	2.35857	17.3	42.0455	14.4215	18.42	31.12	6.34403	16.54	35.13	14.3706	17.45
2013-12-25	02:30:00	2013-12-25 02:30:00	34.1	0.556469	17.6	32.5231	5.74997	16.99	66.2364	2.6912	17.25	45.7455	15.5684	18.39	35.52	6.00898	16.38	38.83	14.4483	18.09
2013-12-25	02:45:00	2013-12-25 02:45:00	36.4	0.556469	17.21	35.3231	14.6814	18.51	68.8364	4.81186	17.49	47.6455	16.1242	18.34	37.42	6.60255	16.35	41.33	14.526	18.35
2013-12-25	03:00:00	2013-12-25 03:00:00	38.4	0.662235	16.17	37.0231	16.5136	18.77	72.3364	7.57083	17.61	50.3455	11.8969	17.63	39.52	11.1606	16.79	43.03	14.6519	18.49
2013-12-25	03:15:00	2013-12-25 03:15:00	41.2	1.42978	16.56	40.4231	16.4514	18.54	75.0364	10.5248	17.69	52.5455	10.4961	17.23	44.12	10.8306	16.88	46.13	14.7807	18.56
2013-12-25	03:30:00	2013-12-25 03:30:00	44.1	4.15161	17.34	42.7231	16.3404	18.52	77.4364	11.4205	17.77	55.4455	10.7469	17.37	44.52	9.90507	16.71	48.83	14.9578	18.54
2013-12-25	03:45:00	2013-12-25 03:45:00	46.6	7.61151	17.93	45.6231	16.9119	18.31	80.9364	12.7164	17.76	58.5455	13.4709	17.85	46.62	9.63522	16.51	52.03	15.1163	18.47
2013-12-25	04:00:00	2013-12-25 04:00:00	48.9	9.75191	17.78	46.9231	19.1829	18.21	83.1364	12.8861	17.73	60.8455	18.275	18.06	51.32	9.713	16.47	54.53	14.5822	16.91
2013-12-25	04:15:00	2013-12-25 04:15:00	51.4	11.3076	17.7	49.6231	19.8744	18.09	85.8364	13.3697	17.73	63.6455	18.9118	18.07	53.12	9.83495	16.39	56.73	14.8773	17.3
2013-12-25	04:30:00	2013-12-25 04:30:00	54.7	12.841	17.52	52.4231	20.3172	18.08	88.4364	13.7294	17.72	65.4455	20.2401	18.09	55.82	9.809	16.25	58.83	14.8773	17.42
2013-12-25	04:45:00	2013-12-25 04:45:00	57.4	14.1406	17.29	55.7231	20.4962	17.98	91.1364	13.8121	17.71	69.5455	20.9124	18.07	59.42	9.73375	16.09	62.43	14.9927	17.55
2013-12-25	05:00:00	2013-12-25 05:00:00	59.9	15.0948	17.18	58.4231	20.3502	17.85	94.4364	14.0097	17.74	71.9455	15.6196	17	62.42	9.68707	15.96	64.63	15.119	17.59
2013-12-25	05:15:00	2013-12-25 05:15:00	62.1	15.7005	17.26	60.7231	20.2484	17.78	96.6364	14.5179	17.77	73.9455	13.6441	16.17	64.92	10.0766	15.73	67.53	15.2642	17.44
2013-12-25	05:30:00	2013-12-25 05:30:00	64	16.1809	17.36	61.9231	20.2071	17.68	98.8364	15.1835	17.71	74.5455	13.6121	16.41	66.82	10.0012	15.66	69.03	15.2777	17.08
2013-12-25	05:45:00	2013-12-25 05:45:00	65.1	16.7628	17.47	62.8231	20.2429	17.54	99.8364	15.2481	17.62	76.0455	15.2077	16.92	68.52	9.99602	15.64	68.43	15.3342	17.06
2013-12-25	06:00:00	2013-12-25 06:00:00	66.4	17.2458	17.51	64.3231	20.4631	17.55	100.836	15.2427	17.56	76.9455	20.1136	17.52	69.32	10.2328	15.59	71.03	15.3046	16.91
2013-12-25	06:15:00	2013-12-25 06:15:00	66	17.6591	17.51	64.3231	20.4631	17.58	101.736	15.2266	17.53	76.9455	18.9748	17.56	69.52	10.2406	15.53	70.83	15.2938	16.97
2013-12-25	06:30:00	2013-12-25 06:30:00	65.3	18.1577	17.52	63.1231	20.8021	17.66	100.636	15.2024	17.51	76.0455	19.2871	17.33	69.12	10.7364	15.47	70.63	15.2777	16.97
2013-12-25	06:45:00	2013-12-25 06:45:00	65.8	18.7285	17.63	63.9231	21.0173	17.69	99.9364	15.2077	17.5	76.2455	19.5943	17.11	68.12	10.7678	15.33	70.23	15.2615	16.78
2013-12-25	07:00:00	2013-12-25 07:00:00	65.8	19.1692	17.67	63.9231	21.3322	17.75	100.236	15.2427	17.5	76.2455	19.8881	17.27	68.72	10.828	15.31	70.83	15.2212	16.7
2013-12-25	07:15:00	2013-12-25 07:15:00	65.6	19.49	17.61	64.1231	21.451	17.75	100.836	15.2669	17.5	77.1455	20.2153	17.48	68.52	10.951	15.26	70.63	15.2266	16.6
2013-12-25	07:30:00	2013-12-25 07:30:00	66.3	19.63	17.43	64.1231	21.2051	17.43	101.036	15.2804	17.52	77.3455	20.0173	17.61	69.12	11.6362	14.98	71.63	15.2373	16.65
2013-12-25	07:45:00	2013-12-25 07:45:00	66.7	19.748	17.34	63.3231	21.125	17.24	101.236	15.3126	17.53	76.9455	20.8021	17.7	69.12	11.8126	14.93	70.13	15.2884	16.9
2013-12-25	08:00:00	2013-12-25 08:00:00	66.5	19.748	17.26	63.7231	21.0587	17.22	101.336	15.4068	17.55	77.4455	21.3377	17.72	68.02	11.723	14.95	70.23	15.3557	16.97
2013-12-25	08:15:00	2013-12-25 08:15:00	67.2	19.8579	17.25	64.4231	21.136	17.27	101.036	15.4257	17.44	77.6455	21.2106	17.7	68.42	11.0322	14.76	69.23	15.4795	17.04
2013-12-25	08:30:00	2013-12-25 08:30:00	67.4	19.9129	17.26	65.5231	21.0891	17.22	101.736	12.8357	15.77	77.1455	21.241	17.68	70.12	11.4784	14.72	72.13	15.6331	17.18
2013-12-25	08:45:00	2013-12-25 08:45:00	66.7	19.9926	17.26	63.6231	21.1195	17.19	101.236	10.645	14.19	78.0455	21.2051	17.64	68.52	11.6835	14.87	70.93	15.7948	17.11
2013-12-25	09:00:00	2013-12-25 09:00:00	67.4	20.0448	17.26	65.0231	21.2189	17.22	102.436	9.42288	14.1	77.9455	21.4095	17.61	71.02	12.1001	14.85	71.33	15.9864	17.12
2013-12-25	09:15:00	2013-12-25 09:15:00	67.4	20.1053	17.28	64.6231	21.241	17.23	99.9364	11.0558	15.37	77.7455	21.5008	17.59	68.72	12.0077	14.71	70.23	16.1134	16.87
2013-12-25	09:30:00	2013-12-25 09:30:00	68.1	19.63	16.99	66.3231	21.3211	17.22	103.436	12.8835	16.53	78.6455	21.7719	17.55	71.62	12.0367	14.65	71.93	16.2999	17.05
2013-12-25	09:45:00	2013-12-25 09:45:00	67.1	18.6083	16.81	65.1231	21.4787	17.23	100.236	17.3654	17.29	78.4455	21.4925	17.51	68.92	12.3088	14.7	72.43	16.3973	16.79
2013-12-25	10:00:00	2013-12-25 10:00:00	66.3	19.0378	17.04	63.1231	21.5755	17.2	101.536	18.2096	17.17	77.3455	21.5976	17.49	67.62	12.0473	14.62	68.73	16.5028	16.65
2013-12-25	10:15:00	2013-12-25 10:15:00	64.2	19.1008	17.18	62.8231	21.6474	17.23	101.036	18.57	16.96	75.2455	20.8186	17.27	69.92	11.8495	14.59	68.83	16.5488	16.53
2013-12-25	10:30:00	2013-12-25 10:30:00	62.4	11.7309	17.75	59.0231	21.7415	17.25	97.0364	18.6329	16.92	71.9455	20.8159	17.14	64.22	11.1108	14.54	67.03	16.3729	15.68
2013-12-25	10:45:00	2013-12-25 10:45:00	60.9	8.97876	17.84	59.0231	21.7166	17.25	97.1364	6.0514	16.24	71.9455	20.7083	17.06	63.62	10.0532	14.45	64.93	16.1458	15.28
2013-12-25	11:00:00	2013-12-25 11:00:00	60.9	6.98807	17.74	58.8231	21.7249	17.29	95.8364	5.3138	16.11	71.6455	18.1032	16.56	60.32	9.39702	14.57	65.33	15.9972	15.34
2013-12-25	11:15:00	2013-12-25 11:15:00	60.1	5.40774	17.71	56.4231	21.6751	17.32	94.6364	5.03773	16.2	69.7455	18.5317	16.85	59.42	8.47738	14.89	63.93	15.8812	15.71
2013-12-25	11:30:00	2013-12-25 11:30:00	58.8	4.33354	17.77	56.4231	21.5312	17.37	95.5364	4.87806	16.4	69.1455	18.6657	16.97	60.32	7.48698	15.05	62.73	15.7652	15.97
2013-12-25	11:45:00	2013-12-25 11:45:00	55.8	3.71045	18.09	53.0231	21.3543	17.44	90.7364	4.95416	16.69	65.8455	18.9584	16.58	59.62	7.45144	15.14	61.03	15.6627	16.06
2013-12-25	12:00:00	2013-12-25 12:00:00	56.1	3.36147	18.34	53.2231	21.2216	17.49	90.0364	10.5849	17.02	66.7455	18.3733	16.34	59.02	6.85684	15.21	59.43	15.5873	16.05
2013-12-25	12:15:00	2013-12-25 12:15:00	56.5	3.16435	18.51	54.2231	21.2548	17.52	90.2364	9.62485	16.41	66.7455	17.6836	16.29	58.02	6.39416	15.39	59.43	15.5361	16.03
2013-12-25	12:30:00	2013-12-25 12:30:00	54.5	3.10517	18.62	52.4231	21.1581	17.57	89.3364	10.0714	16.41	66.0455	17.7925	16.17	55.52	6.16132	15.59	59.13	15.4203	15.97
2013-12-25	12:45:00	2013-12-25 12:45:00	54.7	3.03664	18.69	52.2231	20.9097	17.61	88.7364	10.0948	16.51	64.3455	17.9205	16.12	58.62	6.06888	15.71	57.93	15.3934	15.99
2013-12-25	13:00:00	2013-12-25 13:00:00	56.1	2.80363	18.78	53.2231	21.0449	17.67	91.8364	9.99862	16.59	66.5455	17.2621	16.14	56.52	5.84699	15.86	58.63	15.3395	16.04
2013-12-25	13:15:00	2013-12-25 13:15:00	57	2.93525	18.82	54.7231	21.2797	17.72	90.4364	9.85313	16.6	67.6455	18.0077	16.24	60.52	10.1104	16.13	60.73	15.318	16.08
2013-12-25	13:30:00	2013-12-25 13:30:00	59	5.86193	18.47	57.3231	20.9318	17.83	94.4364	17.0069	17.11	71.9455	18.827	16.35	62.42	13.7854	16.14	63.53	15.2777	15.99
2013-12-25	13:45:00	2013-12-25 13:45:00	60.4	10.658	17.91	58.3231	20.769	17.96	95.7364	16.7249	17.13	72.6455	18.1114	16.37	63.92	14.0818	16.11	63.73	15.2454	16
2013-12-25	14:00:00	2013-12-25 14:00:00	65.1	13.8388	17.74	62.9231	20.554	17.66	98.4364	16.4081	17.09	75.8455	18.0977	16.31	67.22	11.9602	16.33	67.73	15.275	16.02
2013-12-25	14:15:00	2013-12-25 14:15:00	68.1	15.59	17.65	65.1231	20.0861	17.56	101.236	16.4514	17.07	77.8455	17.4088	16.19	68.92	13.6334	16.31	70.13	15.2965	16.1
2013-12-25	14:30:00	2013-12-25 14:30:00	70.3	16.2918	17.63	68.6231	19.9788	17.49	104.736	16.6626	16.99	81.4455	17.9478	16.06	72.72	13.6707	16.26	74.13	15.3934	16.2
2013-12-25	14:45:00	2013-12-25 14:45:00	73.4	16.2728	17.37	70.8231	19.5641	17.39	108.136	16.262	16.81	85.0455	16.9608	16	75.82	13.7721	16.24	78.63	15.4526	16.21
2013-12-25	15:00:00	2013-12-25 15:00:00	79.1	15.0357	17.24	75.8231	18.7285	17.29	110.736	15.7059	16.81	88.9455	16.9472	15.97	79.62	13.8441	16.21	79.43	15.5792	16.25
2013-12-25	15:15:00	2013-12-25 15:15:00	83.2	14.9686	17.05	81.2231	18.8434	17.2	116.736	15.5549	16.84	94.3455	17.7217	16	84.82	14.3118	16.21	87.53	15.6681	16.23
2013-12-25	15:30:00	2013-12-25 15:30:00	88.8	14.3921	16.87	85.2231	16.108	16.81	121.936	15.6331	16.95	99.0455	17.3273	16.04	90.92	14.5447	16.23	91.63	15.7706	16.17
2013-12-25	15:45:00	2013-12-25 15:45:00	90.9	13.9536	16.8	88.8231	16.0999	16.71	126.236	16.1161	16.98	101.745	17.7789	16.1	94.02	15.2266	16.3	95.53	15.8677	16.14
2013-12-25	16:00:00	2013-12-25 16:00:00	93.8	13.7587	16.72	94.1231	16.9201	16.53	129.736	16.1539	16.84	106.245	17.956	16.17	97.92	15.6142	16.24	100.73	15.9487	16.13
2013-12-25	16:15:00	2013-12-25 16:15:00	99.7	14.0203	16.7	96.3231	17.4088	16.57	132.136	15.892	16.83	108.445	18.2341	16.24	101.32	15.6061	16.22	102.03	16.0513	16.08
2013-12-25	16:30:00	2013-12-25 16:30:00	104.9	14.1727	16.64	103.623	17.7898	16.55	138.836	15.598	16.82	114.045	19.0925	16.28	106.42	15.7706	16.2	107.33	16.1377	16.1
2013-12-25	16:45:00	2013-12-25 16:45:00	108.4	14.4349	16.64	105.523	17.8007	16.55	141.936	15.5145	16.62	118.245	18.9474	16.19	110.02	16.0675	16.21	112.83	16.308	16.1
2013-12-25	17:00:00	2013-12-25 17:00:00	111.9	15.033	16.57	109.523	17.975	16.52	146.536	15.7032	16.27	122.345	19.8689	16.07	114.82	16.3567	16.23	116.03	16.4297	16.05
2013-12-25	17:15:00	2013-12-25 17:15:00	114.4	15.9945	16.69	111.723	18.5044	16.46	150.336	15.7032	16.13	128.045	19.3255	16	117.82	16.4297	16.24	120.53	16.5948	16.06
2013-12-25	17:30:00	2013-12-25 17:30:00	117.5	16.7547	16.76	114.323	19.1281	16.37	151.236	15.8029	16.12	126.045	20.1796	16.04	119.12	16.6978	16.22	121.73	16.7845	16.04
2013-12-25	17:45:00	2013-12-25 17:45:00	118.2	17.417	16.75	116.523	19.5202	16.25	152.236	15.7355	16.13	127.545	20.4631	15.88	119.02	17.3001	16.2	120.73	16.9662	16.01
2013-12-25	18:00:00	2013-12-25 18:00:00	118.2	17.9342	16.73	115.823	19.6876	16.17	152.336	16.354	16.09	127.145	20.3447	15.75	119.02	16.8984	16.2	120.33	17.1535	16.02
2013-12-25	18:15:00	2013-12-25 18:15:00	116.2	18.245	16.59	115.123	19.8606	16.18	152.136	17.3137	16.06	128.045	20.7028	15.62	119.82	17.4904	16.19	121.23	17.3246	16.01
2013-12-25	18:30:00	2013-12-25 18:30:00	114.6	18.4962	16.53	114.823	19.9596	16.14	151.036	18.1414	16.02	126.745	20.4273	15.44	118.42	16.9282	16.17	118.13	17.4877	16.02
2013-12-25	18:45:00	2013-12-25 18:45:00	113.7	18.6602	16.43	112.923	20.3998	16.27	149.736	19.0542	15.95	125.645	19.7892	15.4	116.12	16.8604	16.15	117.73	17.6346	16.03
2013-12-25	19:00:00	2013-12-25 19:00:00	113	18.7668	16.42	110.523	20.7525	16.34	149.036	17.5584	15.88	121.745	20.2731	15.39	114.42	16.6111	16.11	115.83	17.7734	16.03
2013-12-25	19:15:00	2013-12-25 19:15:00	112.8	18.6001	16.37	108.823	20.9207	16.32	146.536	15.3557	15.96	121.345	21.3598	15.43	112.12	16.1242	16.07	113.83	17.8987	16.02
2013-12-25	19:30:00	2013-12-25 19:30:00	107.6	18.6957	16.35	106.723	21.0836	16.44	144.836	17.1127	15.85	119.945	21.3847	15.52	111.52	15.0196	16.08	111.43	18.0377	16.08
2013-12-25	19:45:00	2013-12-25 19:45:00	105.6	18.3269	16.28	103.623	21.1636	16.41	141.336	17.2865	15.86	116.745	21.6668	15.63	108.32	14.384	16.1	111.13	18.1632	16.13
2013-12-25	20:00:00	2013-12-25 20:00:00	103.1	17.5856	16.24	100.423	21.2299	16.35	138.436	17.6727	15.84	111.745	23.318	15.68	104.22	13.9135	16.09	107.43	18.2669	16.12
2013-12-25	20:15:00	2013-12-25 20:15:00	98.5	16.2701	16.25	96.8231	21.1774	16.22	133.536	16.8414	15.89	109.945	22.1819	15.73	100.42	13.4256	16.08	102.03	18.3815	16.14
2013-12-25	20:30:00	2013-12-25 20:30:00	95	15.1862	16.34	93.8231	21.1112	16.17	131.736	14.4617	16.03	105.945	22.2706	15.74	95.32	12.9498	16.06	99.53	18.4744	16.14
2013-12-25	20:45:00	2013-12-25 20:45:00	94	14.6948	16.37	92.3231	20.8766	16.19	129.336	14.0177	16.08	103.045	21.7913	15.76	95.72	12.8198	16.06	98.13	18.5727	16.15
2013-12-25	21:00:00	2013-12-25 21:00:00	92.3	14.1647	16.47	90.3231	20.0751	16.18	127.336	13.7374	16.09	101.245	21.9574	15.77	92.42	12.7641	16.04	96.03	18.6493	16.16
2013-12-25	21:15:00	2013-12-25 21:15:00	91.1	13.3618	16.65	89.6231	20.1576	16.27	126.536	13.4682	16.08	102.645	20.8021	15.8	93.92	12.7323	16.02	95.23	18.7422	16.16
2013-12-25	21:30:00	2013-12-25 21:30:00	89.3	13.0268	16.69	86.0231	19.4543	16.24	124.336	13.3165	16.07	99.7455	22.071	15.84	92.02	12.719	16.01	92.63	18.8352	16.14
2013-12-25	21:45:00	2013-12-25 21:45:00	87.8	12.8118	16.62	86.0231	18.8626	16.22	121.536	13.1517	16.09	100.345	22.9898	15.85	91.52	12.7084	15.99	91.63	18.9064	16.12
2013-12-25	22:00:00	2013-12-25 22:00:00	85.7	12.666	16.67	83.3231	18.4361	16.2	122.036	12.91	16.14	96.6455	22.0849	15.86	88.42	12.6819	15.97	87.83	18.983	16.12
2013-12-25	22:15:00	2013-12-25 22:15:00	83.4	12.0446	16.82	81.5231	17.8851	16.16	116.736	12.7588	16.17	93.2455	21.866	15.88	85.02	12.6793	15.93	87.03	19.0542	16.12
2013-12-25	22:30:00	2013-12-25 22:30:00	80.7	10.6841	17.23	76.9231	18.1223	16.14	114.036	12.6263	16.17	89.5455	22.4454	15.89	80.42	12.6766	15.88	83.43	19.1172	16.13
2013-12-25	22:45:00	2013-12-25 22:45:00	75.4	9.68966	17.53	72.5231	19.3392	16.13	110.836	12.5124	16.15	84.3455	21.9962	15.93	79.32	12.6793	15.79	76.53	19.0268	16.08
2013-12-25	23:00:00	2013-12-25 23:00:00	71.6	9.07415	17.66	68.9231	19.9513	16.16	105.536	12.478	16.13	81.5455	22.315	15.97	74.82	12.7615	15.73	75.73	18.8681	15.95
2013-12-25	23:15:00	2013-12-25 23:15:00	67.6	8.14956	17.81	65.1231	18.7477	16.32	102.436	12.6237	16.11	78.4455	21.404	15.99	66.62	12.8994	15.71	69.93	18.8954	16.02
2013-12-25	23:30:00	2013-12-25 23:30:00	65.1	7.29672	17.87	62.6231	14.9498	16.75	100.636	12.7694	16.08	74.1455	20.1108	15.99	70.62	13.0613	15.68	69.73	18.879	16.09
2013-12-25	23:45:00	2013-12-25 23:45:00	62.4	6.72582	17.87	58.4231	8.4184	17.34	95.8364	12.7694	16.06	70.4455	17.8769	15.87	67.62	13.1942	15.66	64.73	18.4525	15.78
2013-12-26	00:00:00	2013-12-26	59.5	6.15882	17.88	55.4231	6.98554	17.59	91.8364	12.6025	16.04	70.0455	16.6896	15.71	59.02	13.3431	15.65	62.53	18.0895	15.58
2013-12-26	00:15:00	2013-12-26 00:15:00	56.8	5.76986	17.87	55.4231	6.51461	17.61	92.5364	12.2876	16.04	67.8455	16.3567	15.62	59.22	13.3724	15.64	60.73	17.7952	15.55
2013-12-26	00:30:00	2013-12-26 00:30:00	55.9	5.35581	17.89	52.4231	5.73257	17.61	90.0364	12.0525	16.02	64.8455	15.9352	15.59	57.62	13.3644	15.61	58.63	17.4551	15.51
2013-12-26	00:45:00	2013-12-26 00:45:00	54.3	4.88787	17.88	51.1231	5.27182	17.62	88.1364	11.889	16	63.7455	15.8434	15.61	54.62	13.3751	15.57	56.73	17.091	15.48
2013-12-26	01:00:00	2013-12-26 01:00:00	53.2	4.42353	17.86	50.5231	5.08202	17.6	88.0364	11.7783	16.01	61.7455	15.2938	15.62	55.52	13.2421	15.53	55.93	16.7628	15.45
2013-12-26	01:15:00	2013-12-26 01:15:00	50.7	4.01136	17.87	48.3231	4.70902	17.6	86.3364	11.6335	16.01	60.6455	15.4661	15.62	53.42	12.9312	15.56	54.23	16.427	15.38
2013-12-26	01:30:00	2013-12-26 01:30:00	50.2	3.61695	17.85	46.9231	4.55755	17.54	84.4364	10.6606	16.11	59.5455	14.4108	15.64	50.82	12.5839	15.66	51.83	16.1188	15.37
2013-12-26	01:45:00	2013-12-26 01:45:00	52.5	3.27823	17.88	50.7231	3.99687	17.51	87.1364	9.89468	16.2	62.3455	14.6519	15.61	55.02	12.1951	15.77	56.53	15.8461	15.3
2013-12-26	02:00:00	2013-12-26 02:00:00	52.5	3.03428	17.89	49.6231	3.44487	17.48	86.0364	9.43065	16.26	61.2455	13.4789	15.61	54.42	12.071	15.82	55.03	15.5657	15.32
2013-12-26	02:15:00	2013-12-26 02:15:00	53.6	2.85998	17.83	50.0231	3.62893	17.46	86.7364	9.16704	16.26	64.5455	13.6494	15.64	56.72	11.8969	15.8	57.63	15.3449	15.3
2013-12-26	02:30:00	2013-12-26 02:30:00	57.6	2.71225	17.77	55.1231	11.7783	17.16	90.4364	8.86028	16.29	68.2455	13.1224	15.64	60.02	11.8706	15.77	60.83	15.1163	15.27
2013-12-26	02:45:00	2013-12-26 02:45:00	60.6	2.89994	17.62	59.8231	11.4468	17.17	94.6364	8.57747	16.32	72.4455	13.7988	15.72	61.32	11.8205	15.74	65.13	14.9068	15.22
2013-12-26	03:00:00	2013-12-26 03:00:00	65.4	3.70805	17.27	63.4231	12.9392	16.87	98.6364	8.38251	16.33	75.2455	14.9041	15.91	67.82	11.8653	15.71	69.23	14.7565	15.21
2013-12-26	03:15:00	2013-12-26 03:15:00	68.8	5.58112	17.01	67.5231	12.2189	16.73	103.136	10.7155	15.92	80.1455	16.2647	15.98	68.92	12.629	15.53	72.63	14.5903	15.37
2013-12-26	03:30:00	2013-12-26 03:30:00	73.1	6.79635	16.9	70.8231	13.3884	16.65	107.336	11.1266	15.78	83.7455	17.1806	16	75.42	13.258	15.44	78.03	14.4617	15.32
2013-12-26	03:45:00	2013-12-26 03:45:00	77.5	7.60388	16.81	76.5231	14.8558	16.54	112.136	11.2892	15.77	89.5455	17.1317	15.97	79.22	13.7774	15.4	82.23	14.4081	15.2
2013-12-26	04:00:00	2013-12-26 04:00:00	82.3	8.868	16.64	80.0231	15.722	16.47	116.536	11.3969	15.8	93.2455	16.4	15.9	84.02	14.3626	15.29	86.63	14.3787	15.24
2013-12-26	04:15:00	2013-12-26 04:15:00	84.5	9.97003	16.55	81.4231	15.3718	16.44	119.836	11.9813	15.91	95.4455	16.1377	15.84	86.52	14.5849	15.26	89.53	14.4188	15.39
2013-12-26	04:30:00	2013-12-26 04:30:00	91	10.5039	16.42	89.6231	15.4714	16.33	125.736	13.149	15.91	101.545	16.1836	15.8	93.32	15.2158	15.34	95.83	14.4751	15.45
2013-12-26	04:45:00	2013-12-26 04:45:00	90	10.9772	16.26	88.4231	15.5576	16.21	127.536	13.8948	15.88	102.645	16.4405	15.7	95.32	15.9487	15.42	95.73	14.5206	15.35
2013-12-26	05:00:00	2013-12-26 05:00:00	95.5	11.4757	16.06	91.7231	16.8333	16.12	128.436	13.999	15.85	105.645	16.8984	15.58	98.82	16.0378	15.36	97.43	14.5876	15.33
2013-12-26	05:15:00	2013-12-26 05:15:00	94	11.9945	15.91	92.5231	18.0105	16.12	128.736	14.4001	15.79	103.445	16.9363	15.53	95.72	16.0486	15.3	98.23	14.66	15.34
2013-12-26	05:30:00	2013-12-26 05:30:00	93.8	12.78	15.89	90.8231	18.3433	16.03	129.136	14.6707	15.75	106.245	16.9852	15.47	97.82	16.0161	15.23	99.63	14.7243	15.3
2013-12-26	05:45:00	2013-12-26 05:45:00	93.2	13.5162	15.85	91.0231	17.8197	15.94	128.736	15.1083	15.76	103.645	17.719	15.43	95.42	15.919	15.17	98.13	14.7833	15.3
2013-12-26	06:00:00	2013-12-26 06:00:00	94.3	14.1994	15.81	94.1231	17.6618	15.83	129.736	15.2588	15.76	105.045	16.4432	15.42	97.02	14.6385	15.31	99.93	14.8155	15.23
2013-12-26	06:15:00	2013-12-26 06:15:00	93.1	14.7136	15.81	91.3231	17.7653	15.77	129.436	14.5608	15.71	105.645	17.0856	15.43	95.42	12.2797	15.54	97.73	14.8612	15.24
2013-12-26	06:30:00	2013-12-26 06:30:00	98.8	15.068	15.78	97.3231	17.9859	15.8	133.336	12.9631	15.49	110.645	17.3708	15.5	102.12	11.8416	15.78	103.53	14.9149	15.39
2013-12-26	06:45:00	2013-12-26 06:45:00	100.8	15.2588	15.67	99.0231	17.956	15.77	139.036	14.1486	15.46	113.445	17.7544	15.53	104.82	15.6654	15.44	105.63	14.9632	15.45
2013-12-26	07:00:00	2013-12-26 07:00:00	104.9	15.4634	15.58	101.823	17.9124	15.7	139.436	15.7112	15.44	115.845	17.9941	15.43	105.82	16.2512	15.48	108.53	15.0545	15.46
2013-12-26	07:15:00	2013-12-26 07:15:00	104.2	15.7139	15.57	100.623	17.8197	15.65	138.836	16.2999	15.26	117.145	18.9036	15.36	106.72	16.6924	15.5	108.73	15.1378	15.37
2013-12-26	07:30:00	2013-12-26 07:30:00	106.2	15.946	15.6	104.623	18.1905	15.71	139.836	16.5624	15.25	114.445	18.8954	15.32	106.52	16.8062	15.42	109.83	15.2696	15.35
2013-12-26	07:45:00	2013-12-26 07:45:00	103.5	16.1647	15.62	101.323	18.4006	15.72	138.136	17.1426	15.25	115.045	18.7887	15.31	106.62	16.9662	15.43	108.33	15.388	15.32
2013-12-26	08:00:00	2013-12-26 08:00:00	105.3	16.3404	15.64	101.323	18.529	15.75	136.936	17.6237	15.31	113.445	20.1548	15.32	105.92	17.1019	15.44	107.13	15.5199	15.32
2013-12-26	08:15:00	2013-12-26 08:15:00	102	16.5217	15.67	98.0231	18.6219	15.72	135.336	17.9015	15.36	110.845	18.5126	15.32	100.92	17.1154	15.45	104.23	15.6573	15.32
2013-12-26	08:30:00	2013-12-26 08:30:00	99.2	16.6734	15.71	97.6231	18.7121	15.76	133.736	18.2832	15.38	109.745	18.9912	15.32	101.62	17.0937	15.45	101.53	15.7921	15.32
2013-12-26	08:45:00	2013-12-26 08:45:00	98.3	16.8062	15.74	95.4231	18.7942	15.77	133.336	18.5427	15.39	109.145	18.9118	15.33	101.42	17.1507	15.45	102.13	15.9217	15.33
2013-12-26	09:00:00	2013-12-26 09:00:00	97.8	16.9716	15.77	94.1231	18.8298	15.79	132.736	18.57	15.4	107.645	19.8606	15.34	98.82	17.1833	15.45	100.83	16.0459	15.33
2013-12-26	09:15:00	2013-12-26 09:15:00	95.6	17.0964	15.81	94.4231	18.9009	15.77	131.836	18.5782	15.41	107.645	18.8188	15.34	98.82	14.9686	15.53	99.83	16.1782	15.32
2013-12-26	09:30:00	2013-12-26 09:30:00	94.5	17.2322	15.85	93.2231	19.0049	15.59	130.036	18.6001	15.41	105.645	19.3556	15.36	97.62	17.0286	15.57	98.93	16.2972	15.38
2013-12-26	09:45:00	2013-12-26 09:45:00	90.3	17.3572	15.88	88.8231	19.1281	15.46	125.636	18.6165	15.42	101.945	19.3556	15.38	92.82	17.1317	15.53	94.83	16.3783	15.38
2013-12-26	10:00:00	2013-12-26 10:00:00	87.8	17.33	15.96	82.9231	19.1884	15.41	122.336	18.6575	15.43	97.1455	19.0569	15.39	88.82	15.3019	15.56	88.33	16.5136	15.36
2013-12-26	10:15:00	2013-12-26 10:15:00	85.3	14.5313	16.49	83.1231	19.224	15.41	120.136	18.6848	15.46	95.2455	18.8626	15.4	88.42	13.1889	15.61	89.53	16.603	15.4
2013-12-26	10:30:00	2013-12-26 10:30:00	83.1	12.3273	16.9	82.1231	19.2323	15.42	118.136	18.6411	15.51	94.7455	19.8524	15.42	85.02	12.849	15.62	85.63	16.7438	15.41
2013-12-26	10:45:00	2013-12-26 10:45:00	78.9	10.7809	17.17	75.9231	19.2268	15.42	114.336	18.4443	15.54	89.1455	19.6245	15.44	82.32	12.7111	15.66	81.53	16.8279	15.44
2013-12-26	11:00:00	2013-12-26 11:00:00	76.4	9.77007	17.3	73.4231	19.2542	15.45	112.136	16.1323	15.67	87.2455	19.2021	15.46	79.62	12.6422	15.76	80.73	16.8984	15.49
2013-12-26	11:15:00	2013-12-26 11:15:00	75.7	9.02	17.37	74.7231	19.2377	15.48	111.536	13.9749	15.81	86.0455	17.4741	15.48	80.22	12.6554	15.84	79.13	16.9309	15.53
2013-12-26	11:30:00	2013-12-26 11:30:00	73.5	8.45173	17.47	70.6231	19.2487	15.52	110.336	13.5268	15.97	85.6455	18.786	15.5	77.72	12.7615	15.91	77.93	17.0069	15.58
2013-12-26	11:45:00	2013-12-26 11:45:00	74.4	8.02179	17.56	70.6231	19.2432	15.55	109.736	13.3325	16.13	86.0455	18.4143	15.52	76.42	12.8198	15.98	77.93	17.0937	15.61
2013-12-26	12:00:00	2013-12-26 12:00:00	75.7	7.79987	17.64	73.4231	19.2377	15.59	110.336	13.1729	16.31	86.9455	17.9641	15.54	77.72	12.8198	16.05	79.33	17.1453	15.63
2013-12-26	12:15:00	2013-12-26 12:15:00	75.9	8.78307	17.17	72.1231	19.2514	15.62	109.736	13.0401	16.46	85.0455	20.1576	15.56	76.02	12.9073	16.14	77.43	17.2105	15.63
2013-12-26	12:30:00	2013-12-26 12:30:00	75.9	10.9117	16.7	74.2231	19.1857	15.75	110.136	16.7113	15.9	87.8455	19.4653	15.56	76.22	13.2421	16.24	79.43	17.273	15.64
2013-12-26	12:45:00	2013-12-26 12:45:00	75.8	12.8065	16.31	74.5231	19.2131	15.78	110.436	18.3078	15.6	87.5455	19.394	15.57	78.12	13.3325	16.34	78.93	17.33	15.64
2013-12-26	13:00:00	2013-12-26 13:00:00	74.2	14.2262	16.15	72.0231	19.2323	15.8	109.436	18.3952	15.7	85.4455	18.8024	15.58	77.52	16.1404	16.33	77.83	17.3762	15.64
2013-12-26	13:15:00	2013-12-26 13:15:00	77.1	15.2131	16.09	74.5231	19.2898	15.76	111.036	18.387	15.8	86.5455	20.4301	15.58	79.32	15.6924	16.34	80.03	17.4252	15.65
2013-12-26	13:30:00	2013-12-26 13:30:00	73.5	15.9594	16.03	71.8231	19.2789	15.74	110.336	18.4389	15.77	86.1455	18.775	15.57	78.52	14.5715	16.54	78.93	17.4768	15.67
2013-12-26	13:45:00	2013-12-26 13:45:00	71.7	16.4703	16.08	71.3231	19.3063	15.78	108.636	18.5372	15.7	83.7455	19.3967	15.56	76.22	13.5268	16.6	77.93	17.5149	15.67
2013-12-26	14:00:00	2013-12-26 14:00:00	70.3	16.8631	16.12	67.5231	19.2953	15.79	105.536	18.6001	15.7	81.1455	19.0706	15.59	74.52	12.8649	16.74	75.03	17.5394	15.67
2013-12-26	14:15:00	2013-12-26 14:15:00	71	17.1182	16.16	68.4231	19.3145	15.81	104.236	18.6739	15.73	80.2455	19.3693	15.64	71.02	12.5521	16.81	73.33	17.5448	15.68
2013-12-26	14:30:00	2013-12-26 14:30:00	71.4	17.349	16.17	67.2231	19.3172	15.81	105.236	18.7395	15.78	81.4455	18.7641	15.65	72.42	12.4357	16.85	74.53	17.5747	15.7
2013-12-26	14:45:00	2013-12-26 14:45:00	72.6	17.504	16.21	70.5231	19.3364	15.83	105.536	18.7668	15.8	82.3455	19.3145	15.6	72.72	12.3907	16.88	75.03	17.6019	15.71
2013-12-26	15:00:00	2013-12-26 15:00:00	71.6	17.64	16.27	69.2231	19.3172	15.84	106.536	18.8106	15.83	83.2455	19.5312	15.56	73.52	14.9149	16.81	75.43	17.6101	15.73
2013-12-26	15:15:00	2013-12-26 15:15:00	76.6	17.6945	16.33	75.4231	19.3008	15.86	110.836	18.8161	15.86	87.5455	19.9019	15.52	79.62	17.2132	16.4	81.33	17.64	15.72
2013-12-26	15:30:00	2013-12-26 15:30:00	81.2	17.7217	16.35	79.7231	19.2926	15.89	115.836	18.8462	15.89	92.8455	20.4383	15.48	83.62	17.4551	16.16	85.23	17.6809	15.52
2013-12-26	15:45:00	2013-12-26 15:45:00	89.7	17.5176	16.41	86.7231	19.2432	15.92	123.336	18.8708	15.89	99.3455	19.4873	15.47	90.32	17.7244	16.02	92.93	17.7108	15.44
2013-12-26	16:00:00	2013-12-26 16:00:00	94.7	17.0883	16.2	90.8231	18.8735	15.85	128.236	18.9064	15.92	103.445	19.8084	15.47	97.62	18.0132	15.9	96.73	17.7571	15.35
2013-12-26	16:15:00	2013-12-26 16:15:00	97.1	16.9146	15.91	95.6231	18.4744	15.75	132.636	18.92	15.98	109.545	19.2789	15.48	101.02	18.4962	15.72	101.53	17.7952	15.32
2013-12-26	16:30:00	2013-12-26 16:30:00	103.1	16.8008	15.79	100.423	18.6165	15.72	138.636	18.8462	15.99	115.845	19.0432	15.47	104.62	18.6356	15.65	108.33	17.8633	15.3
2013-12-26	16:45:00	2013-12-26 16:45:00	106.9	16.714	15.74	105.523	18.1386	15.7	141.636	17.4469	16.04	118.745	19.3995	15.46	110.02	18.8763	15.51	111.13	17.9124	15.3
2013-12-26	17:00:00	2013-12-26 17:00:00	110.6	16.7167	15.67	109.823	18.1495	15.63	146.836	17.072	15.98	123.045	19.7206	15.43	114.02	19.035	15.44	116.03	17.9641	15.3
2013-12-26	17:15:00	2013-12-26 17:15:00	116	16.7438	15.6	115.823	18.2368	15.59	150.736	17.2757	15.83	126.545	19.2432	15.39	117.82	19.3172	15.39	120.93	17.9968	15.32
2013-12-26	17:30:00	2013-12-26 17:30:00	120.5	16.8794	15.54	120.023	18.2559	15.49	156.736	17.9042	15.66	131.345	19.803	15.35	123.52	19.3858	15.38	124.53	18.0405	15.32
2013-12-26	17:45:00	2013-12-26 17:45:00	122.7	17.0557	15.5	120.723	18.6001	15.45	157.436	18.5837	15.48	135.345	19.737	15.3	126.82	19.405	15.38	129.43	18.0814	15.33
2013-12-26	18:00:00	2013-12-26 18:00:00	123	17.273	15.46	122.123	19.0131	15.41	159.736	18.931	15.44	136.545	19.3309	15.28	127.62	19.4214	15.38	129.13	18.1114	15.34
2013-12-26	18:15:00	2013-12-26 18:15:00	124.9	17.4768	15.43	121.823	19.2049	15.38	159.436	18.5509	15.53	135.645	19.5806	15.28	126.62	19.3584	15.39	130.03	18.1414	15.34
2013-12-26	18:30:00	2013-12-26 18:30:00	124.5	17.7135	15.41	121.323	19.4159	15.36	156.536	18.9638	15.46	134.045	20.5127	15.29	124.72	19.2597	15.42	128.03	18.1686	15.35
2013-12-26	18:45:00	2013-12-26 18:45:00	123.9	17.8933	15.4	121.123	19.5202	15.35	158.336	19.0569	15.45	133.245	20.1713	15.3	126.22	17.2757	15.76	129.23	18.1959	15.35
2013-12-26	19:00:00	2013-12-26 19:00:00	122.8	18.0541	15.39	122.823	19.5559	15.35	157.636	19.0925	15.45	134.545	19.4297	15.3	125.12	17.3681	15.79	126.33	17.9696	15.36
2013-12-26	19:15:00	2013-12-26 19:15:00	121.8	18.1632	15.39	119.423	19.5613	15.35	157.436	19.046	15.48	133.445	19.3145	15.31	124.02	17.5013	15.74	125.63	18.1632	15.37
2013-12-26	19:30:00	2013-12-26 19:30:00	121.6	18.2587	15.4	119.423	19.6245	15.35	158.036	19.0843	15.48	131.545	20.0173	15.31	124.92	15.6007	15.94	126.53	18.3296	15.37
2013-12-26	19:45:00	2013-12-26 19:45:00	120.7	18.3351	15.41	118.723	19.6711	15.35	155.836	19.0871	15.48	132.545	19.5257	15.32	124.12	15.2615	15.99	124.53	18.2259	15.38
2013-12-26	20:00:00	2013-12-26 20:00:00	118.7	18.4034	15.42	117.623	19.7535	15.35	154.036	16.354	15.74	130.545	19.3584	15.32	124.12	14.8987	15.98	126.13	18.2396	15.38
2013-12-26	20:15:00	2013-12-26 20:15:00	117.8	18.4034	15.42	115.623	19.8167	15.35	152.736	15.1217	15.9	129.745	18.8626	15.33	119.52	14.3198	16.03	122.53	18.2368	15.39
2013-12-26	20:30:00	2013-12-26 20:30:00	115.1	18.4252	15.44	113.023	19.8387	15.35	149.736	17.6754	15.65	126.245	20.1741	15.34	117.82	14.7351	16.01	119.43	18.3597	15.39
2013-12-26	20:45:00	2013-12-26 20:45:00	113.9	18.4443	15.45	112.723	19.8552	15.36	149.736	18.5645	15.61	125.845	20.4135	15.34	117.82	14.1219	16.03	119.53	18.2778	15.4
2013-12-26	21:00:00	2013-12-26 21:00:00	113.5	18.4798	15.47	110.323	19.8524	15.37	147.636	18.9036	15.62	120.845	19.7618	15.35	113.62	13.7774	16.05	115.63	18.2996	15.4
2013-12-26	21:15:00	2013-12-26 21:15:00	107.3	18.4689	15.5	105.323	19.8771	15.38	142.836	19.1665	15.56	117.145	20.6615	15.36	109.32	14.0925	16.01	110.53	18.499	15.41
2013-12-26	21:30:00	2013-12-26 21:30:00	104	18.4744	15.53	101.823	20.0366	15.36	139.036	19.1364	15.59	114.945	20.1713	15.36	106.02	15.4741	15.89	106.43	18.4525	15.41
2013-12-26	21:45:00	2013-12-26 21:45:00	101.7	17.9805	15.67	99.0231	20.1081	15.34	135.636	17.4931	15.61	111.045	20.4962	15.37	101.62	16.3621	15.8	103.73	18.5263	15.41
2013-12-26	22:00:00	2013-12-26 22:00:00	99.4	16.8496	15.92	96.1231	20.1246	15.35	133.136	16.7113	15.65	107.745	20.2924	15.38	100.02	16.6517	15.75	101.03	18.6001	15.42
2013-12-26	22:15:00	2013-12-26 22:15:00	94.7	16.1107	15.99	92.3231	20.1383	15.35	129.936	16.189	15.7	105.245	20.4135	15.39	97.62	16.6517	15.73	99.63	18.6001	15.43
2013-12-26	22:30:00	2013-12-26 22:30:00	93.4	15.4768	16.08	91.3231	20.1466	15.37	128.536	15.8434	15.75	104.345	20.1411	15.39	96.22	16.4838	15.68	97.73	18.6329	15.45
2013-12-26	22:45:00	2013-12-26 22:45:00	89.7	14.8477	16.15	87.9231	20.1411	15.39	124.536	15.6142	15.79	99.8455	20.5733	15.4	93.02	16.2566	15.65	92.83	18.6547	15.46
2013-12-26	23:00:00	2013-12-26 23:00:00	84.5	14.7056	16.09	81.2231	20.1493	15.41	119.636	15.4499	15.82	94.7455	20.5402	15.41	86.12	16.0432	15.62	87.33	18.4416	15.51
2013-12-26	23:15:00	2013-12-26 23:15:00	80.1	14.5367	16.08	77.8231	20.1301	15.42	115.836	15.3207	15.83	91.0455	20.1603	15.42	82.72	15.7679	15.59	82.53	18.3133	15.52
2013-12-26	23:30:00	2013-12-26 23:30:00	77.1	14.1834	16.2	73.5231	20.1273	15.45	112.536	15.1808	15.83	85.8455	20.2208	15.43	79.02	15.4795	15.57	79.43	18.1986	15.51
2013-12-26	23:45:00	2013-12-26 23:45:00	73.5	13.8334	16.33	70.6231	20.0806	15.5	108.336	14.9847	15.84	83.4455	20.0971	15.46	75.62	15.2804	15.59	75.83	17.9723	15.53
2013-12-27	00:00:00	2013-12-27	68.6	13.3751	16.51	65.3231	19.8167	15.62	104.836	14.593	15.87	77.8455	19.1144	15.48	71.02	15.1325	15.62	70.43	17.5584	15.54
2013-12-27	00:15:00	2013-12-27 00:15:00	64.4	12.5813	16.69	61.2231	19.9953	15.62	101.236	14.1647	15.89	74.5455	17.0177	15.48	67.42	15.0035	15.62	66.63	17.3273	15.55
2013-12-27	00:30:00	2013-12-27 00:30:00	61.3	11.6546	16.87	58.0231	20.0448	15.6	97.4364	13.8068	15.91	70.8455	15.9648	15.49	64.22	14.9122	15.61	64.43	17.0829	15.53
2013-12-27	00:45:00	2013-12-27 00:45:00	56.8	10.5666	17.04	52.4231	19.5559	15.67	92.4364	13.4922	15.91	65.2455	15.9756	15.48	60.52	14.8746	15.58	57.73	16.8767	15.5
2013-12-27	01:00:00	2013-12-27 01:00:00	54.3	9.62485	17.14	50.3231	19.4763	15.72	90.0364	13.266	15.88	63.2455	15.9756	15.38	57.92	14.5286	15.56	56.13	16.6788	15.47
2013-12-27	01:15:00	2013-12-27 01:15:00	50.2	8.73678	17.24	46.0231	18.9748	15.8	85.3364	13.0799	15.86	58.7455	15.5307	15.38	54.22	14.0818	15.62	52.13	16.473	15.42
2013-12-27	01:30:00	2013-12-27 01:30:00	48.2	7.81771	17.34	43.9231	19.0076	15.81	83.1364	12.9684	15.78	56.2455	15.3718	15.44	50.62	13.9349	15.66	48.83	16.2837	15.38
2013-12-27	01:45:00	2013-12-27 01:45:00	45.4	6.87702	17.42	41.8231	18.57	15.88	81.0364	12.8065	15.77	53.9455	14.8639	15.39	48.72	13.9776	15.66	47.13	16.1215	15.29
2013-12-27	02:00:00	2013-12-27 02:00:00	42.5	5.999	17.48	38.5231	18.1086	15.94	77.4364	12.396	15.81	50.6455	13.6947	15.26	44.12	13.8228	15.57	44.43	16.1539	15.45
2013-12-27	02:15:00	2013-12-27 02:15:00	40.9	5.19781	17.52	37.2231	16.7249	16.15	75.7364	12.2242	15.8	49.5455	13.8761	15.24	44.52	13.3591	15.61	41.83	16.1836	15.57
2013-12-27	02:30:00	2013-12-27 02:30:00	39.5	4.48441	17.54	35.7231	12.6819	16.53	74.8364	12.1317	15.76	49.5455	14.015	15.32	42.02	13.0321	15.63	42.93	16.2485	15.71
2013-12-27	02:45:00	2013-12-27 02:45:00	39.3	3.91245	17.54	36.0231	9.3634	16.67	73.7364	11.7388	15.84	48.2455	14.3546	15.26	40.52	12.9418	15.62	41.53	16.5299	15.85
2013-12-27	03:00:00	2013-12-27 03:00:00	38	3.39957	17.55	34.5231	8.33383	16.47	72.1364	11.3522	15.92	47.1455	15.4391	15.64	38.42	12.8357	15.59	40.33	16.8035	15.93
2013-12-27	03:15:00	2013-12-27 03:15:00	40.2	2.9918	17.53	37.6231	7.9248	16.3	75.0364	10.0766	16.16	49.9455	20.3585	15.89	41.22	12.7906	15.55	42.73	17.1969	15.98
2013-12-27	03:30:00	2013-12-27 03:30:00	43.9	2.67718	17.48	42.4231	16.8523	16.17	77.1364	8.88087	16.35	55.0455	22.5925	15.99	44.12	12.8092	15.5	47.93	17.5911	15.96
2013-12-27	03:45:00	2013-12-27 03:45:00	47.2	2.59081	17.36	45.6231	19.1391	16.05	80.2364	7.86104	16.45	57.4455	23.19	16.03	49.22	16.7303	15.5	51.33	18.0023	15.97
2013-12-27	04:00:00	2013-12-27 04:00:00	50	4.13467	16.74	49.3231	22.3677	15.97	85.4364	13.258	16.16	62.5455	24.1682	16.03	53.82	21.5893	15.66	56.73	18.4197	15.96
2013-12-27	04:15:00	2013-12-27 04:15:00	53.9	8.35945	16.31	53.2231	23.6606	16.08	88.7364	19.1336	16	65.8455	24.1096	16.04	57.62	21.6944	15.64	59.13	18.8188	15.95
2013-12-27	04:30:00	2013-12-27 04:30:00	56.6	13.0879	16.14	54.4231	24.0371	16.06	91.5364	21.3515	15.93	67.6455	22.9231	16.03	58.82	21.2741	15.62	61.33	19.1994	15.94
2013-12-27	04:45:00	2013-12-27 04:45:00	62.1	15.8893	16.11	60.0231	24.2632	16.05	95.8364	21.9602	15.92	72.3455	23.3654	16.03	62.82	19.2405	15.48	65.93	19.5696	15.94
2013-12-27	05:00:00	2013-12-27 05:00:00	64.7	17.7843	16.1	63.3231	24.5341	16.04	99.1364	22.2235	15.92	76.0455	23.4127	16.02	65.92	16.5596	15.31	68.43	19.8744	15.93
2013-12-27	05:15:00	2013-12-27 05:15:00	69.2	19.0186	16.1	66.7231	24.5677	16.03	103.336	22.4232	15.91	80.9455	24.2799	16.02	70.12	16.0729	15.22	72.83	20.1548	15.92
2013-12-27	05:30:00	2013-12-27 05:30:00	72.3	19.8167	16.08	70.5231	24.3413	16.01	107.636	22.5397	15.92	83.6455	24.1571	16.02	74.72	16.3675	15.42	76.43	20.4328	15.92
2013-12-27	05:45:00	2013-12-27 05:45:00	71.2	20.2264	16.06	70.1231	24.2408	15.98	107.436	22.6203	15.95	82.3455	23.7247	16	73.52	16.7547	15.47	77.43	20.6891	15.92
2013-12-27	06:00:00	2013-12-27 06:00:00	75.5	20.565	16.08	74.7231	23.9896	15.97	110.736	22.7063	15.97	88.0455	23.8139	15.98	78.12	16.8441	15.43	79.63	20.9207	15.89
2013-12-27	06:15:00	2013-12-27 06:15:00	78.7	20.9373	16.06	76.2231	23.6996	15.96	113.136	22.8786	15.97	90.3455	24.2185	15.97	82.32	16.6382	15.37	81.73	21.1277	15.91
2013-12-27	06:30:00	2013-12-27 06:30:00	81.4	21.1554	16.05	78.8231	23.708	15.94	114.936	22.9036	16	92.1455	23.669	15.95	81.32	16.9689	15.37	83.93	21.3322	15.92
2013-12-27	06:45:00	2013-12-27 06:45:00	82.1	21.2714	16.05	80.2231	23.6885	15.93	116.136	22.9203	16.02	92.7455	23.6355	15.93	82.92	16.7899	15.33	84.83	21.5146	15.91
2013-12-27	07:00:00	2013-12-27 07:00:00	84.5	21.6391	16.03	82.1231	23.9255	15.98	117.836	22.9314	16.04	94.0455	23.293	15.92	84.42	16.1809	15.28	87.13	21.6972	15.91
2013-12-27	07:15:00	2013-12-27 07:15:00	87	22.0461	16.02	84.8231	23.6522	15.93	121.036	22.9787	16.03	96.7455	23.7275	15.91	88.62	16.2701	15.34	90.13	21.8799	15.92
2013-12-27	07:30:00	2013-12-27 07:30:00	90.3	22.3289	15.98	88.4231	24.0259	15.96	124.936	22.9731	16.03	102.345	23.46	15.91	91.92	17.0177	15.36	93.43	22.0433	15.93
2013-12-27	07:45:00	2013-12-27 07:45:00	95.6	22.4926	15.96	92.9231	24.118	15.97	129.736	23.3208	16.03	105.645	23.1733	15.9	97.92	18.2887	15.39	98.13	22.1819	15.87
2013-12-27	08:00:00	2013-12-27 08:00:00	97.3	22.5509	15.88	94.7231	23.9171	15.92	134.136	23.4183	16.02	108.945	23.6021	15.86	102.12	22.3871	15.59	102.43	22.3122	15.86
2013-12-27	08:15:00	2013-12-27 08:15:00	98.5	22.7397	15.89	96.8231	23.8139	15.89	133.536	23.5798	16.01	109.545	21.3681	15.75	100.92	22.5758	15.68	100.63	22.4315	15.86
2013-12-27	08:30:00	2013-12-27 08:30:00	103.9	22.9036	15.96	101.223	24.185	15.94	136.436	23.6132	15.99	111.945	21.2935	15.74	102.52	19.0898	15.25	104.23	22.537	15.77
2013-12-27	08:45:00	2013-12-27 08:45:00	102.4	22.9203	15.94	99.4231	24.1096	15.93	137.136	23.5352	15.98	112.945	21.1885	15.67	103.82	18.6766	15.11	105.93	22.6286	15.8
2013-12-27	09:00:00	2013-12-27 09:00:00	102	22.3622	15.74	99.7231	23.9813	15.93	137.736	23.357	15.98	114.045	21.0007	15.57	105.02	17.7244	15.05	107.63	22.6758	15.68
2013-12-27	09:15:00	2013-12-27 09:15:00	99.5	22.6258	15.83	97.8231	24.0371	15.94	135.236	23.4573	16	111.045	20.9511	15.54	103.12	17.3898	15.1	104.83	22.748	15.61
2013-12-27	09:30:00	2013-12-27 09:30:00	101.8	20.6229	15.58	100.723	24.3749	15.95	137.036	23.5046	16	113.645	20.9152	15.54	105.22	16.473	15.12	107.23	22.648	15.37
2013-12-27	09:45:00	2013-12-27 09:45:00	100.4	20.2429	15.54	99.5231	24.2296	15.95	137.436	23.5798	16	111.345	20.9373	15.6	103.52	17.6346	15.19	106.13	22.7119	15.47
2013-12-27	10:00:00	2013-12-27 10:00:00	98.3	20.3227	15.65	97.5231	24.2045	15.94	134.636	23.5993	15.94	108.945	21.2686	15.67	100.82	16.3026	15.21	102.03	22.6758	15.48
2013-12-27	10:15:00	2013-12-27 10:15:00	95.7	20.6973	15.75	93.7231	24.1208	15.96	131.736	23.499	15.95	107.145	21.3598	15.68	101.22	15.3907	15.22	99.63	22.5758	15.49
2013-12-27	10:30:00	2013-12-27 10:30:00	96.6	20.7359	15.77	96.3231	24.3022	15.95	131.536	23.4907	15.96	108.945	21.3432	15.71	99.62	15.5038	15.21	101.73	22.6119	15.52
2013-12-27	10:45:00	2013-12-27 10:45:00	96.6	20.9262	15.79	94.3231	24.2687	16	131.636	23.6522	15.97	106.645	22.9397	15.73	97.92	15.3153	15.2	99.93	22.5814	15.64
2013-12-27	11:00:00	2013-12-27 11:00:00	93.3	21.1277	15.84	91.3231	23.9701	15.95	127.836	23.6606	15.96	104.245	21.9547	15.73	95.72	15.493	15.17	98.23	22.5536	15.57
2013-12-27	11:15:00	2013-12-27 11:15:00	90.9	21.5921	15.94	87.7231	24.2129	16	125.836	23.6495	15.93	101.245	22.0406	15.73	93.22	15.6304	15.14	92.83	22.5397	15.6
2013-12-27	11:30:00	2013-12-27 11:30:00	88.2	22.0045	15.98	87.2231	24.1459	16.04	123.636	23.5993	15.92	100.645	22.3538	15.72	90.92	15.66	15.12	93.43	22.5148	15.55
2013-12-27	11:45:00	2013-12-27 11:45:00	87.8	22.2956	16.01	85.0231	24.1989	16.02	123.836	23.6327	15.94	98.0455	22.0461	15.72	90.32	15.6654	15.1	89.43	22.5203	15.54
2013-12-27	12:00:00	2013-12-27 12:00:00	82.1	22.5647	16.03	80.9231	24.2827	15.99	119.036	23.4851	15.91	94.5455	22.2512	15.73	87.32	15.6385	15.09	85.13	22.4537	15.54
2013-12-27	12:15:00	2013-12-27 12:15:00	81.4	21.4455	16.17	79.5231	24.1961	16.02	116.536	23.1177	15.92	91.0455	22.3816	15.73	84.02	15.5819	15.12	84.63	22.4509	15.52
2013-12-27	12:30:00	2013-12-27 12:30:00	76	17.2404	16.61	73.7231	24.1794	15.99	112.536	20.3034	15.77	85.4455	22.0322	15.73	80.22	15.5011	15.2	80.03	22.3344	15.58
2013-12-27	12:45:00	2013-12-27 12:45:00	74.1	15.0653	16.8	71.0231	24.2129	15.98	109.036	15.7355	15.41	84.9455	21.866	15.71	75.62	15.3261	15.14	75.23	21.8273	15.27
2013-12-27	13:00:00	2013-12-27 13:00:00	71.9	13.2367	16.89	69.6231	24.2157	16	106.336	14.9686	15.37	81.2455	21.7691	15.68	73.52	14.8719	15.06	74.13	21.9242	15.43
2013-12-27	13:15:00	2013-12-27 13:15:00	71	11.6835	17	68.9231	23.8781	16.03	105.736	14.4751	15.4	81.7455	22.4815	15.7	74.42	14.7377	15.05	75.23	21.9159	15.56
2013-12-27	13:30:00	2013-12-27 13:30:00	66.9	10.4622	17.08	63.4231	23.8474	16.06	103.036	14.0097	15.51	76.3455	21.4759	15.78	72.42	14.5849	15.07	69.73	21.8605	15.72
2013-12-27	13:45:00	2013-12-27 13:45:00	64.7	9.3996	17.14	62.2231	23.7832	16.08	99.9364	13.5748	15.64	75.2455	22.0987	15.84	68.42	14.3867	15.11	67.53	21.7608	15.64
2013-12-27	14:00:00	2013-12-27 14:00:00	63.8	8.6237	17.22	61.7231	23.7721	16.09	97.5364	13.3298	15.69	73.5455	22.3095	15.88	66.02	14.1165	15.14	67.53	21.8384	15.77
2013-12-27	14:15:00	2013-12-27 14:15:00	63.6	7.78968	17.33	60.8231	23.7693	16.1	97.7364	13.6334	15.75	74.3455	22.3788	15.9	66.42	13.5801	15.23	66.83	21.8993	15.84
2013-12-27	14:30:00	2013-12-27 14:30:00	60.8	6.90477	17.4	59.0231	23.7498	16.12	95.8364	13.7721	15.77	71.3455	22.3677	15.92	62.42	13.2022	15.4	64.43	21.9547	15.86
2013-12-27	14:45:00	2013-12-27 14:45:00	62.6	6.28642	17.43	61.4231	23.5798	16.12	96.7364	13.9242	15.78	73.9455	22.3622	15.95	66.32	13.0534	15.49	67.83	22.0433	15.86
2013-12-27	15:00:00	2013-12-27 15:00:00	66	7.74638	17.1	63.7231	23.8139	16.13	98.9364	11.8574	15.96	77.1455	22.132	15.97	66.02	13.7881	15.65	69.93	22.1431	15.82
2013-12-27	15:15:00	2013-12-27 15:15:00	67.1	11.8996	16.57	65.8231	23.7609	16.16	101.536	19.2816	15.91	77.8455	22.5286	15.99	68.72	22.1708	15.77	71.73	22.2263	15.76
2013-12-27	15:30:00	2013-12-27 15:30:00	69.8	15.24	16.37	67.2231	23.8641	16.15	104.836	21.4427	15.95	80.4455	22.6452	16	72.42	22.5064	15.79	74.33	22.3122	15.75
2013-12-27	15:45:00	2013-12-27 15:45:00	73.5	17.4197	16.29	71.3231	24.1012	16.14	108.936	22.2346	15.95	86.0455	22.7647	15.98	75.62	22.7202	15.79	78.43	22.4121	15.73
2013-12-27	16:00:00	2013-12-27 16:00:00	81.1	18.7723	16.27	78.0231	24.1654	16.13	114.536	22.462	15.97	91.6455	22.8286	15.94	83.42	22.3483	15.8	84.83	22.487	15.68
2013-12-27	16:15:00	2013-12-27 16:15:00	86.8	19.6794	16.23	85.2231	24.2045	16.08	121.336	22.6425	15.99	97.9455	22.8508	15.89	87.42	21.6723	15.77	90.43	22.537	15.65
2013-12-27	16:30:00	2013-12-27 16:30:00	88.1	20.4273	16.19	85.0231	24.1599	16.04	124.136	22.7425	16	99.3455	22.8119	15.8	91.32	21.1774	15.73	92.83	22.5925	15.66
2013-12-27	16:45:00	2013-12-27 16:45:00	91.6	20.94	16.16	89.2231	24.0343	15.99	127.636	22.6452	16.02	102.145	22.4926	15.73	94.32	21.0477	15.71	95.53	22.6341	15.66
2013-12-27	17:00:00	2013-12-27 17:00:00	96.6	21.3432	16.1	94.3231	23.9115	15.95	131.736	22.5897	16.02	108.045	22.5092	15.7	98.52	21.0145	15.69	99.13	22.6619	15.65
2013-12-27	17:15:00	2013-12-27 17:15:00	102.6	21.6225	16.05	101.623	23.9645	15.92	137.036	22.5175	16.03	113.045	21.9325	15.7	104.62	19.6547	15.63	106.83	22.6786	15.64
2013-12-27	17:30:00	2013-12-27 17:30:00	104.8	21.783	16	103.823	23.9868	15.9	140.236	22.4426	16.03	116.245	22.3039	15.67	109.82	19.3611	15.58	110.43	22.6869	15.64
2013-12-27	17:45:00	2013-12-27 17:45:00	108.5	21.8799	15.93	106.523	23.6606	15.84	143.036	22.3927	16.03	119.145	21.9907	15.65	110.42	19.1692	15.58	110.93	22.7175	15.62
2013-12-27	18:00:00	2013-12-27 18:00:00	110.6	21.9464	15.86	110.523	23.4656	15.76	146.536	22.4287	16.04	122.345	22.3261	15.63	114.02	18.8489	15.57	115.03	22.7286	15.62
2013-12-27	18:15:00	2013-12-27 18:15:00	113.9	21.9768	15.8	112.223	23.4071	15.7	149.236	22.4343	16.04	124.945	22.2789	15.61	115.72	18.0186	15.62	117.93	22.7175	15.64
2013-12-27	18:30:00	2013-12-27 18:30:00	113.5	22.0128	15.73	112.423	23.2874	15.63	148.936	22.4121	16.05	124.545	22.1375	15.59	116.72	18.7887	15.67	118.13	22.748	15.66
2013-12-27	18:45:00	2013-12-27 18:45:00	114.6	21.999	15.65	112.023	23.2123	15.55	149.736	22.3039	16.05	125.045	22.193	15.55	116.12	19.2953	15.66	119.33	22.7647	15.66
2013-12-27	19:00:00	2013-12-27 19:00:00	117.4	22.0267	15.56	114.323	23.2012	15.51	150.336	22.537	16.06	126.945	22.0793	15.52	118.92	19.1035	15.71	121.03	22.7813	15.65
2013-12-27	19:15:00	2013-12-27 19:15:00	119.1	21.9741	15.5	116.823	23.2151	15.49	154.536	22.873	16.07	129.345	22.1209	15.5	120.12	20.419	15.76	123.93	22.8036	15.64
2013-12-27	19:30:00	2013-12-27 19:30:00	121	21.9408	15.47	118.923	23.332	15.5	156.436	23.1455	15.87	131.645	22.254	15.49	121.42	21.4842	15.76	124.93	22.8286	15.64
2013-12-27	19:45:00	2013-12-27 19:45:00	120.9	21.891	15.44	119.523	23.3487	15.5	156.236	23.2401	15.76	132.645	22.1154	15.48	122.62	21.8716	15.74	125.63	22.848	15.64
2013-12-27	20:00:00	2013-12-27 20:00:00	122.5	21.8827	15.42	121.723	23.3459	15.47	157.336	23.3682	15.74	134.145	22.6258	15.48	123.42	22.193	15.73	128.43	22.8619	15.65
2013-12-27	20:15:00	2013-12-27 20:15:00	123.5	21.8328	15.43	122.323	23.4211	15.48	158.636	23.4322	15.72	134.945	21.2714	15.47	126.12	22.4565	15.72	127.33	22.873	15.64
2013-12-27	20:30:00	2013-12-27 20:30:00	124.8	21.7525	15.44	123.323	23.4851	15.49	159.736	23.4238	15.7	136.945	23.2791	15.46	127.62	22.3899	15.73	128.63	22.8869	15.64
2013-12-27	20:45:00	2013-12-27 20:45:00	125.2	21.7415	15.45	123.323	23.2513	15.45	158.736	23.3542	15.66	134.345	22.2956	15.45	127.72	22.5453	15.72	129.83	22.8981	15.65
2013-12-27	21:00:00	2013-12-27 21:00:00	123.7	21.783	15.45	123.323	23.0371	15.44	158.836	23.3709	15.68	136.045	22.3538	15.45	126.82	22.8981	15.7	129.53	22.9036	15.64
2013-12-27	21:15:00	2013-12-27 21:15:00	121.6	21.7968	15.47	119.323	22.9703	15.44	157.336	23.46	15.7	132.145	22.34	15.45	124.52	22.9342	15.7	126.63	22.9286	15.63
2013-12-27	21:30:00	2013-12-27 21:30:00	122.8	21.7913	15.48	121.623	23.1845	15.44	158.136	23.5018	15.7	133.045	22.2568	15.45	124.52	22.3871	15.7	127.63	22.912	15.6
2013-12-27	21:45:00	2013-12-27 21:45:00	121.7	21.4593	15.53	119.623	23.2206	15.45	155.836	23.5324	15.69	132.945	22.8508	15.46	125.32	21.7775	15.65	125.13	22.9231	15.61
2013-12-27	22:00:00	2013-12-27 22:00:00	118.5	20.4576	15.6	116.123	23.1622	15.47	153.436	23.5742	15.68	128.945	22.4121	15.47	121.42	21.8799	15.63	122.53	22.9286	15.62
2013-12-27	22:15:00	2013-12-27 22:15:00	112.3	20.1603	15.62	110.523	20.3832	15.53	146.736	23.6077	15.65	123.845	22.4676	15.47	114.82	21.1029	15.55	116.23	22.9008	15.59
2013-12-27	22:30:00	2013-12-27 22:30:00	108.3	19.8881	15.61	103.123	18.4471	15.55	141.936	20.7332	15.33	116.745	23.0315	15.48	109.02	19.1692	15.43	110.23	22.9092	15.57
2013-12-27	22:45:00	2013-12-27 22:45:00	103.5	18.775	15.63	101.023	20.4301	15.57	138.836	20.2511	15.3	114.045	22.4537	15.48	106.72	18.7313	15.34	108.03	22.8842	15.59
2013-12-27	23:00:00	2013-12-27 23:00:00	99.3	17.9614	15.67	97.1231	20.78	15.55	135.136	20.0586	15.26	108.445	22.1209	15.48	103.92	18.9693	15.23	104.93	22.8786	15.64
2013-12-27	23:15:00	2013-12-27 23:15:00	96.1	17.0367	15.72	91.8231	22.0599	15.55	130.636	19.9541	15.2	106.245	22.7702	15.49	96.82	19.1802	15.17	98.93	22.7591	15.48
2013-12-27	23:30:00	2013-12-27 23:30:00	91.8	16.3675	15.75	89.1231	21.5533	15.55	128.436	19.9184	15.15	101.545	22.7952	15.49	95.72	19.2624	15.15	95.73	22.598	15.23
2013-12-27	23:45:00	2013-12-27 23:45:00	85	15.563	16.03	82.2231	21.3266	15.56	122.036	19.8964	15.13	95.9455	21.664	15.43	87.82	19.2405	15.16	89.23	22.4204	15.11
2013-12-28	00:00:00	2013-12-28	80	14.8263	16.32	76.4231	20.0008	15.6	113.836	19.8497	15.09	88.9455	20.4934	15.28	82.52	19.5257	15.2	83.23	22.2568	15.13
2013-12-28	00:15:00	2013-12-28 00:15:00	74.4	14.1406	16.43	69.6231	16.8713	16.02	110.536	19.3721	15.01	81.7455	20.7194	15.31	76.22	19.9156	15.22	75.53	22.0932	15.19
2013-12-28	00:30:00	2013-12-28 00:30:00	70.5	13.5135	16.48	66.3231	16.3188	16.23	105.436	18.9419	15.02	79.1455	20.7856	15.24	72.62	19.7425	15.13	71.93	21.8799	15.12
2013-12-28	00:45:00	2013-12-28 00:45:00	64.4	12.9472	16.51	59.5231	14.9632	16.34	101.936	18.5645	15.11	72.8455	19.2295	15.15	65.52	19.4379	15.04	65.83	21.664	15.02
2013-12-28	01:00:00	2013-12-28 01:00:00	60.2	12.3537	16.58	56.0231	13.0959	16.45	95.4364	18.4115	15.15	68.8455	19.3995	15.09	63.92	18.8051	14.94	62.43	21.4731	14.95
2013-12-28	01:15:00	2013-12-28 01:15:00	54.9	11.6783	16.66	50.3231	12.3008	16.46	91.1364	18.2723	15.16	62.5455	18.1004	15.08	55.92	18.2396	14.89	56.23	21.2548	14.91
2013-12-28	01:30:00	2013-12-28 01:30:00	50.4	10.951	16.74	44.4231	11.2656	16.52	86.2364	18.1905	15.15	57.3455	18.2914	15.11	51.62	17.9096	14.89	48.63	21.0421	14.85
2013-12-28	01:45:00	2013-12-28 01:45:00	47	10.1521	16.83	40.8231	9.32979	16.64	83.1364	17.8688	15.27	54.3455	17.8088	15.11	49.12	17.8225	14.91	45.73	20.8517	14.8
2013-12-28	02:00:00	2013-12-28 02:00:00	43	9.3272	16.92	36.5231	7.98605	16.76	78.1364	17.5693	15.31	48.0455	17.6237	15.11	46.62	17.7598	14.92	41.43	20.6532	14.75
2013-12-28	02:15:00	2013-12-28 02:15:00	40.2	8.46199	16.98	34.5231	6.91486	16.83	75.7364	17.2295	15.3	47.5455	18.0677	15.07	42.82	17.6237	14.94	40.33	20.4741	14.72
2013-12-28	02:30:00	2013-12-28 02:30:00	37.3	7.59371	17.04	31.1231	5.999	16.88	71.9364	17.0829	15.28	43.0455	18.3296	14.99	39.52	17.4768	15.05	37.43	20.2814	14.7
2013-12-28	02:45:00	2013-12-28 02:45:00	35	6.81903	17.07	29.6231	5.36323	16.91	70.1364	16.3621	15.41	41.4455	17.5911	14.97	35.82	17.4442	15.19	35.93	20.0888	14.7
2013-12-28	03:00:00	2013-12-28 03:00:00	33	6.03144	17.1	27.6231	4.83637	16.91	67.3364	15.4418	15.62	40.1455	16.1836	15.22	36.52	17.2485	15.23	32.93	19.9101	14.78
2013-12-28	03:15:00	2013-12-28 03:15:00	32	5.26935	17.12	28.1231	4.36514	16.9	66.0364	13.9402	15.81	41.2455	15.5442	15.36	29.82	16.9092	15.21	33.53	19.7315	14.84
2013-12-28	03:30:00	2013-12-28 03:30:00	30.5	4.5356	17.13	26.2231	3.88836	16.89	65.5364	12.7429	15.92	39.0455	14.7538	15.43	32.12	16.7628	15.16	32.23	19.5476	14.75
2013-12-28	03:45:00	2013-12-28 03:45:00	30	3.93656	17.12	26.1231	3.41149	16.86	64.8364	11.6651	16.01	39.2455	13.8548	15.53	31.92	16.3513	15.11	31.83	19.4132	14.57
2013-12-28	04:00:00	2013-12-28 04:00:00	30.7	3.47589	17.1	27.5231	3.19991	16.86	64.1364	10.2745	16.15	40.1455	13.2474	15.58	31.72	15.9837	15.08	33.93	19.2487	14.49
2013-12-28	04:15:00	2013-12-28 04:15:00	29.3	3.10517	17.09	24.1231	2.73566	16.83	62.9364	8.98133	16.27	37.5455	13.7561	15.53	30.02	15.865	15.03	30.33	19.1035	14.44
2013-12-28	04:30:00	2013-12-28 04:30:00	30.3	2.81301	17.05	27.8231	2.6912	16.79	64.6364	7.24351	16.42	40.3455	14.1754	15.43	34.42	13.1118	15.37	33.13	18.9803	14.46
2013-12-28	04:45:00	2013-12-28 04:45:00	30.8	2.57683	17.05	28.5231	2.54888	16.72	64.1364	6.45185	16.37	40.5455	14.1406	15.2	33.22	12.211	15.52	33.93	18.8352	14.48
2013-12-28	05:00:00	2013-12-28 05:00:00	33.5	2.37246	17.09	32.5231	2.58149	16.66	66.8364	5.58608	16.34	44.9455	14.285	15.16	33.72	11.7204	15.56	38.13	18.7121	14.49
2013-12-28	05:15:00	2013-12-28 05:15:00	38.7	2.15571	17.07	37.2231	6.60506	16.51	70.5364	4.47223	16.38	49.2455	14.5849	15.26	39.12	12.9153	15.48	42.53	18.5837	14.68
2013-12-28	05:30:00	2013-12-28 05:30:00	39.8	2.02512	16.92	37.2231	7.78968	16.42	73.4364	6.49452	16.27	50.6455	15.0088	15.3	41.82	13.7454	15.18	44.03	18.4361	14.75
2013-12-28	05:45:00	2013-12-28 05:45:00	43.6	2.05027	16.66	42.4231	10.3031	16.01	78.3364	8.9736	15.96	55.4455	15.5091	15.28	46.02	14.0524	15.01	49.13	18.3351	14.72
2013-12-28	06:00:00	2013-12-28 06:00:00	47.2	2.62113	16.4	45.8231	16.9391	16.05	80.2364	9.74413	15.86	58.2455	15.6358	15.19	48.32	12.9923	15.05	51.43	18.2177	14.79
2013-12-28	06:15:00	2013-12-28 06:15:00	49.3	5.93417	16.09	46.8231	20.6587	16.04	84.1364	10.6763	15.79	59.7455	16.2458	15.1	51.32	12.6978	15.09	53.33	18.1168	14.74
2013-12-28	06:30:00	2013-12-28 06:30:00	53.6	10.0714	16.01	52.7231	21.6335	15.96	87.6364	12.1925	15.59	66.0455	17.4959	15.02	56.52	12.6846	15.08	59.43	18.0296	14.67
2013-12-28	06:45:00	2013-12-28 06:45:00	58.6	13.1676	15.94	56.4231	22.1126	15.88	91.3364	13.2314	15.5	69.9455	18.0241	14.93	57.92	13.3165	15.05	61.53	17.9887	14.56
2013-12-28	07:00:00	2013-12-28 07:00:00	64.9	14.7833	15.8	63.9231	21.5229	15.81	97.3364	14.6922	15.38	76.3455	18.1823	14.88	65.12	15.1862	14.98	69.43	17.9887	14.47
2013-12-28	07:15:00	2013-12-28 07:15:00	70.3	15.2104	15.61	68.7231	21.866	15.72	103.436	15.59	15.2	81.9455	19.8497	14.89	70.52	17.3735	14.73	74.73	17.9914	14.49
2013-12-28	07:30:00	2013-12-28 07:30:00	74.6	14.8907	15.46	72.3231	22.193	15.75	108.436	16.3702	15.07	85.4455	18.9666	14.89	76.42	19.4626	14.56	80.33	18.0132	14.53
2013-12-28	07:45:00	2013-12-28 07:45:00	80.9	14.6198	15.41	79.8231	22.0655	15.71	115.036	16.7438	15.07	93.7455	19.2076	14.84	83.12	19.8634	14.57	86.33	18.0486	14.54
2013-12-28	08:00:00	2013-12-28 08:00:00	87.7	14.9202	15.35	85.5231	21.4925	15.63	121.336	17.0449	15.09	98.9455	19.172	14.78	88.22	19.9623	14.57	91.63	18.1168	14.56
2013-12-28	08:15:00	2013-12-28 08:15:00	93.4	15.0814	15.35	92.0231	20.6312	15.58	128.236	17.2512	15.12	104.345	18.5973	14.79	95.12	19.9871	14.58	98.63	18.1632	14.59
2013-12-28	08:30:00	2013-12-28 08:30:00	99.9	15.687	15.46	97.5231	21.0504	15.57	134.536	17.4224	15.12	111.245	18.8462	14.8	102.92	20.0228	14.61	103.93	18.2559	14.63
2013-12-28	08:45:00	2013-12-28 08:45:00	104	16.5326	15.52	102.623	21.2161	15.55	139.336	17.6264	14.99	115.245	18.6957	14.78	105.92	20.2731	14.67	108.83	18.3269	14.67
2013-12-28	09:00:00	2013-12-28 09:00:00	108.5	17.3083	15.52	104.823	21.393	15.54	142.336	17.1915	14.98	118.645	18.1059	14.77	110.02	20.4273	14.71	111.93	18.4034	14.71
2013-12-28	09:15:00	2013-12-28 09:15:00	109.5	18.0814	15.51	107.123	21.5423	15.5	144.636	17.9314	14.91	119.545	18.4798	14.79	113.02	20.5733	14.76	115.53	18.4853	14.76
2013-12-28	09:30:00	2013-12-28 09:30:00	111.5	18.7067	15.46	109.523	21.4455	15.43	146.236	18.2832	14.89	121.745	19.3145	14.84	115.32	20.7332	14.81	116.23	18.5673	14.8
2013-12-28	09:45:00	2013-12-28 09:45:00	113.7	19.1364	15.43	112.523	21.4538	15.39	150.436	18.5372	14.89	125.445	19.1665	14.88	115.92	20.8186	14.85	119.83	18.6684	14.83
2013-12-28	10:00:00	2013-12-28 10:00:00	115.1	19.4379	15.34	112.523	21.2741	15.31	150.436	18.5017	15.01	122.845	20.9262	14.91	115.92	20.9262	14.91	117.53	18.7614	14.88
2013-12-28	10:15:00	2013-12-28 10:15:00	120.9	19.6135	15.25	117.823	21.067	15.23	154.136	19.1199	15.04	131.245	19.5202	14.93	123.02	21.0201	14.95	123.73	18.8489	14.93
2013-12-28	10:30:00	2013-12-28 10:30:00	120.2	19.7453	15.16	118.723	21.2327	15.11	156.536	19.5668	15.09	130.545	20.3172	14.95	124.32	21.1056	14.99	124.73	18.9337	14.97
2013-12-28	10:45:00	2013-12-28 10:45:00	116.5	19.9239	15.15	115.823	21.5672	15.12	153.036	19.7535	15.09	126.245	20.1796	14.96	120.92	21.1554	15.03	122.83	19.0186	15.01
2013-12-28	11:00:00	2013-12-28 11:00:00	122.8	20.0888	15.15	121.623	21.8217	15.13	156.036	20.3419	15.11	131.845	20.0173	14.96	123.92	21.2161	15.09	124.53	19.1062	15.07
2013-12-28	11:15:00	2013-12-28 11:15:00	117.2	20.2126	15.17	116.323	21.7387	15.18	153.636	20.7139	15.12	129.345	20.2236	14.98	122.02	21.2382	15.13	123.43	19.1966	15.1
2013-12-28	11:30:00	2013-12-28 11:30:00	119	20.3227	15.23	117.823	21.664	15.24	152.336	20.9124	15.14	129.545	20.1466	15.06	120.72	21.2769	15.17	122.83	19.2734	15.14
2013-12-28	11:45:00	2013-12-28 11:45:00	122.8	20.3805	15.29	119.723	21.6418	15.25	156.236	21.0007	15.16	130.545	20.6146	15.05	124.72	21.3211	15.23	125.93	19.3474	15.19
2013-12-28	12:00:00	2013-12-28 12:00:00	118.7	20.3943	15.36	118.723	21.581	15.26	157.036	21.1305	15.19	129.345	20.4603	15.04	123.22	21.3322	15.26	123.73	19.405	15.21
2013-12-28	12:15:00	2013-12-28 12:15:00	114.3	20.3557	15.42	113.623	21.4538	15.34	152.936	21.1857	15.27	128.445	20.7442	15.19	119.02	21.3681	15.31	118.93	19.4845	15.24
2013-12-28	12:30:00	2013-12-28 12:30:00	114.4	20.2759	15.47	112.523	21.4178	15.33	148.836	20.353	15.48	124.645	20.375	15.21	114.82	21.3598	15.37	117.53	19.5339	15.32
2013-12-28	12:45:00	2013-12-28 12:45:00	111.2	20.1741	15.45	109.123	21.487	15.33	145.136	20.2511	15.49	119.745	20.4686	15.19	110.92	21.3736	15.42	113.53	19.6107	15.47
2013-12-28	13:00:00	2013-12-28 13:00:00	104.2	20.0916	15.47	102.923	20.7525	15.47	139.036	20.2759	15.5	115.845	20.6201	15.15	107.72	21.2299	15.48	107.33	19.6492	15.57
2013-12-28	13:15:00	2013-12-28 13:15:00	99.2	19.9348	15.5	97.3231	15.7571	16.23	134.636	20.0366	15.61	109.145	21.963	15.17	102.02	21.0753	15.51	100.93	19.6327	15.7
2013-12-28	13:30:00	2013-12-28 13:30:00	93.8	19.7041	15.54	92.2231	16.3053	16.15	130.136	19.9513	15.66	105.045	20.3585	15.26	96.42	20.8931	15.53	95.23	19.6547	15.7
2013-12-28	13:45:00	2013-12-28 13:45:00	93.4	19.4543	15.6	93.4231	15.9244	16.22	129.336	19.8689	15.69	103.245	19.7151	15.32	95.12	20.7083	15.57	95.73	19.6574	15.69
2013-12-28	14:00:00	2013-12-28 14:00:00	91.8	18.7121	15.86	91.2231	15.6789	16.32	128.036	17.5339	16.22	102.645	19.792	15.41	95.82	20.6312	15.61	99.43	19.6711	15.71
2013-12-28	14:15:00	2013-12-28 14:15:00	90	17.9096	16.09	87.5231	17.0747	16.15	125.336	17.0367	16.31	100.845	19.5943	15.4	93.72	20.5843	15.65	95.13	19.6629	15.75
2013-12-28	14:30:00	2013-12-28 14:30:00	89.3	17.4768	16.16	86.2231	19.501	15.77	123.736	16.8984	16.34	99.3455	19.8771	15.39	92.42	20.5843	15.71	91.83	19.6684	15.83
2013-12-28	14:45:00	2013-12-28 14:45:00	87.1	17.3871	16.01	86.0231	18.7149	15.91	123.836	16.7547	16.38	99.0455	19.7013	15.46	89.22	20.5485	15.79	92.13	19.6629	15.88
2013-12-28	15:00:00	2013-12-28 15:00:00	89.5	17.0584	16.12	88.8231	19.1884	15.75	124.036	16.6463	16.39	98.9455	18.8516	15.43	91.92	20.5678	15.84	92.83	19.6519	15.97
2013-12-28	15:15:00	2013-12-28 15:15:00	89.8	16.7195	16.23	90.5231	19.4214	15.72	124.536	16.473	16.46	101.745	19.8909	15.39	90.92	20.6119	15.88	92.13	19.6629	15.93
2013-12-28	15:30:00	2013-12-28 15:30:00	88.2	16.4189	16.35	85.5231	19.7947	15.73	123.136	16.4081	16.49	96.7455	20.0063	15.36	88.62	20.6091	15.97	90.53	19.6711	15.69
2013-12-28	15:45:00	2013-12-28 15:45:00	90.3	16.2377	16.35	88.4231	20.0696	15.72	124.036	16.6653	16.44	101.045	19.9046	15.35	93.02	20.6119	16.07	95.23	19.7123	15.55
2013-12-28	16:00:00	2013-12-28 16:00:00	94.5	16.6165	16.15	91.5231	20.1768	15.7	128.236	17.5611	16.27	105.245	20.1081	15.34	95.52	20.656	16.18	97.43	19.8084	15.51
2013-12-28	16:15:00	2013-12-28 16:15:00	96.6	17.034	15.94	96.5231	20.4053	15.64	130.436	18.5427	16.04	107.145	19.8469	15.34	99.52	20.8711	16.12	100.03	19.8387	15.56
2013-12-28	16:30:00	2013-12-28 16:30:00	99.5	17.4306	15.86	94.4231	20.5375	15.67	133.636	18.9666	15.98	108.045	20.0118	15.36	100.32	20.9124	16.12	103.73	19.8689	15.6
2013-12-28	16:45:00	2013-12-28 16:45:00	98.8	17.8061	15.83	97.6231	20.5127	15.68	133.536	19.3584	15.89	110.845	20.8407	15.42	100.92	20.9649	16.14	104.23	19.9266	15.63
2013-12-28	17:00:00	2013-12-28 17:00:00	103.5	18.1441	15.82	101.323	20.532	15.7	136.236	19.6053	15.83	111.945	20.3364	15.5	102.72	21.1056	16.11	105.13	19.9541	15.66
2013-12-28	17:15:00	2013-12-28 17:15:00	104.9	18.4115	15.8	102.823	20.5402	15.7	138.636	19.8552	15.79	114.745	20.1328	15.53	106.82	21.1719	16.11	105.53	19.9843	15.69
2013-12-28	17:30:00	2013-12-28 17:30:00	106.9	18.6411	15.83	104.123	20.5485	15.71	143.236	19.9926	15.95	118.645	19.7865	15.52	108.82	21.2797	16.1	111.63	20.0256	15.74
2013-12-28	17:45:00	2013-12-28 17:45:00	117.1	18.7887	15.86	115.823	20.5457	15.73	151.436	20.5623	15.79	126.945	19.8387	15.5	117.82	21.4759	15.94	121.13	20.0998	15.71
2013-12-28	18:00:00	2013-12-28 18:00:00	118.8	18.9036	15.9	116.323	20.4714	15.78	153.836	20.7359	15.79	129.345	19.8442	15.66	123.82	21.5782	15.93	122.83	20.2071	15.45
2013-12-28	18:15:00	2013-12-28 18:15:00	122.3	18.9994	15.92	119.223	20.5788	15.81	156.236	20.8821	15.83	132.345	19.8359	15.75	126.12	21.7166	15.95	126.33	20.3172	15.3
2013-12-28	18:30:00	2013-12-28 18:30:00	125.7	19.1062	15.94	124.523	20.6863	15.83	161.136	21.0201	15.88	138.145	19.8799	15.81	130.62	22.0433	15.91	130.83	20.4135	15.29
2013-12-28	18:45:00	2013-12-28 18:45:00	128.6	19.2076	15.97	126.523	20.9124	15.85	163.536	21.0918	15.97	137.645	19.9101	15.76	130.42	22.5564	15.79	132.73	20.5402	15.28
2013-12-28	19:00:00	2013-12-28 19:00:00	127.7	19.3721	15.97	130.723	21.194	15.81	163.036	21.1581	16.02	137.645	20.4163	15.58	129.32	22.8536	15.8	132.43	20.6753	15.29
2013-12-28	19:15:00	2013-12-28 19:15:00	131.8	19.5833	15.89	126.223	21.2244	15.78	164.636	21.3045	15.97	142.545	20.2676	15.46	132.52	23.0426	15.8	132.93	20.8352	15.31
2013-12-28	19:30:00	2013-12-28 19:30:00	130.7	19.7892	15.79	127.823	21.5118	15.73	165.536	21.6391	15.86	139.945	20.9593	15.36	133.32	23.3932	15.73	135.33	20.9704	15.34
2013-12-28	19:45:00	2013-12-28 19:45:00	136.1	19.9981	15.76	135.023	21.6335	15.68	172.436	21.8217	15.82	147.145	21.3266	15.3	140.02	23.6885	15.63	142.33	21.1222	15.34
2013-12-28	20:00:00	2013-12-28 20:00:00	144.7	20.1823	15.81	141.723	21.783	15.73	180.736	22.4065	15.64	155.145	22.3178	15.31	148.42	23.9255	15.64	150.33	21.2824	15.39
2013-12-28	20:15:00	2013-12-28 20:15:00	144.5	20.3282	15.89	144.923	21.8411	15.87	184.436	22.7563	15.6	157.345	22.3455	15.33	152.42	24.0454	15.65	152.73	21.4234	15.42
2013-12-28	20:30:00	2013-12-28 20:30:00	148.3	20.4714	15.98	149.023	21.9547	15.97	184.236	23.14	15.53	163.045	22.4204	15.34	153.82	24.1208	15.66	154.63	21.5893	15.45
2013-12-28	20:45:00	2013-12-28 20:45:00	153.1	20.6119	15.99	151.923	22.0184	15.95	187.836	23.7247	15.42	164.045	22.8897	15.36	157.22	24.3413	15.64	155.63	21.7221	15.47
2013-12-28	21:00:00	2013-12-28 21:00:00	153.4	20.7607	15.9	153.323	22.2568	15.82	191.336	23.8808	15.43	165.245	22.3427	15.4	157.62	24.6348	15.6	160.63	21.8827	15.5
2013-12-28	21:15:00	2013-12-28 21:15:00	155.7	20.9318	15.81	151.123	22.5786	15.7	191.036	23.9506	15.47	164.745	21.6806	15.43	156.22	24.7746	15.59	159.43	22.0101	15.53
2013-12-28	21:30:00	2013-12-28 21:30:00	154.2	21.0974	15.74	155.323	22.9036	15.59	189.136	24.0901	15.5	167.545	22.9008	15.47	157.82	24.8669	15.59	155.63	22.1569	15.55
2013-12-28	21:45:00	2013-12-28 21:45:00	149	21.2741	15.72	150.023	23.051	15.54	186.036	24.1989	15.52	161.745	22.9259	15.49	153.52	24.9257	15.6	155.93	22.2873	15.56
2013-12-28	22:00:00	2013-12-28 22:00:00	146.2	21.4234	15.68	147.523	23.101	15.53	183.236	24.2324	15.53	155.745	22.4121	15.5	153.22	25.004	15.59	152.93	22.4093	15.57
2013-12-28	22:15:00	2013-12-28 22:15:00	146	21.5644	15.72	148.923	23.0093	15.76	184.336	24.2911	15.56	154.445	23.3403	15.5	148.52	25.032	15.6	151.43	22.5175	15.68
2013-12-28	22:30:00	2013-12-28 22:30:00	146	21.6751	15.76	146.423	23.1817	15.78	183.336	24.3162	15.61	158.945	23.0454	15.61	148.02	25.0012	15.68	151.83	22.6036	15.77
2013-12-28	22:45:00	2013-12-28 22:45:00	147	21.7941	15.77	141.623	23.2151	15.8	182.336	24.1989	15.76	157.045	23.5993	15.59	147.62	24.8361	15.76	153.63	22.6841	15.81
2013-12-28	23:00:00	2013-12-28 23:00:00	148.7	21.9159	15.78	145.723	23.4155	15.76	180.736	24.1571	15.8	156.045	22.2318	15.68	150.12	24.7522	15.81	152.63	22.7536	15.85
2013-12-28	23:15:00	2013-12-28 23:15:00	145.8	21.999	15.78	148.023	23.4684	15.82	179.436	24.1794	15.83	151.845	22.7563	15.81	146.92	24.6963	15.83	145.53	22.8508	15.84
2013-12-28	23:30:00	2013-12-28 23:30:00	139.3	22.0987	15.81	135.123	23.4433	15.82	173.736	24.1515	15.84	148.645	22.426	15.88	141.12	24.6096	15.86	142.53	22.8897	15.86
2013-12-28	23:45:00	2013-12-28 23:45:00	136.4	22.2068	15.85	133.623	23.63	15.85	170.236	24.0789	15.88	139.745	22.1486	15.89	141.52	24.4224	15.9	144.83	22.9481	15.89
2013-12-29	00:00:00	2013-12-29	134.5	22.3095	15.94	132.423	23.4016	15.92	169.536	23.839	15.93	143.445	23.1539	15.94	137.42	24.1989	15.93	138.03	22.9536	15.95
2013-12-29	00:15:00	2013-12-29 00:15:00	131.5	22.3122	15.98	127.423	23.2151	15.97	161.636	23.6077	16.01	143.945	22.4454	16	129.32	23.8781	15.98	136.73	22.9926	15.97
2013-12-29	00:30:00	2013-12-29 00:30:00	130.8	22.2429	16.08	122.723	22.8536	16.05	161.536	23.3542	16.11	138.145	21.3211	16.06	128.22	23.6467	16.06	134.83	22.9926	16.02
2013-12-29	00:45:00	2013-12-29 00:45:00	123.9	22.1653	16.17	122.023	22.5953	16.17	160.436	22.9787	16.2	130.645	21.0201	16.17	128.02	23.5464	16.19	125.93	22.9787	16.1
2013-12-29	01:00:00	2013-12-29 01:00:00	118.3	21.963	16.24	117.923	21.963	16.23	153.636	22.5703	16.2	129.845	19.1418	16.24	120.12	23.2485	16.22	120.53	22.9648	16.21
2013-12-29	01:15:00	2013-12-29 01:15:00	113	21.5893	16.3	111.223	21.1195	16.3	150.736	22.254	16.24	122.845	19.8112	16.25	114.42	22.9092	16.28	121.23	22.9342	16.23
2013-12-29	01:30:00	2013-12-29 01:30:00	108.1	21.1968	16.32	102.923	20.5816	16.32	144.736	22.0101	16.3	119.245	20.9318	16.3	111.92	22.562	16.32	109.23	22.8925	16.3
2013-12-29	01:45:00	2013-12-29 01:45:00	101.7	20.9097	16.36	100.023	20.5182	16.35	135.636	21.7553	16.39	113.045	19.9843	16.34	104.12	22.2457	16.37	101.83	22.8091	16.33
2013-12-29	02:00:00	2013-12-29 02:00:00	94.8	20.6229	16.41	95.9231	20.2098	16.41	132.036	21.4704	16.47	105.845	19.8139	16.4	99.72	21.8522	16.51	98.13	22.7119	16.47
2013-12-29	02:15:00	2013-12-29 02:15:00	88.6	19.8661	16.51	85.7231	18.1823	16.47	124.936	21.0007	16.47	97.5455	19.9623	16.39	88.62	21.3874	16.63	91.93	22.623	16.62
2013-12-29	02:30:00	2013-12-29 02:30:00	85.3	18.8653	16.67	81.2231	16.189	16.66	119.436	20.7773	16.42	91.2455	19.5613	16.43	84.42	21.1554	16.66	83.73	22.5009	16.67
2013-12-29	02:45:00	2013-12-29 02:45:00	77.5	17.7816	16.78	72.5231	14.8934	16.78	113.236	20.7083	16.42	85.8455	19.3008	16.47	78.72	20.8159	16.58	78.73	22.3372	16.58
2013-12-29	03:00:00	2013-12-29 03:00:00	73.7	16.7249	16.87	69.8231	13.8575	16.86	108.636	20.4769	16.42	80.4455	20.0338	16.51	75.22	20.5733	16.5	72.43	22.1791	16.47
2013-12-29	03:15:00	2013-12-29 03:15:00	68.3	15.5684	17	65.3231	12.6316	16.98	103.536	20.0641	16.44	77.4455	19.3501	16.51	70.22	20.3667	16.49	72.63	22.0489	16.46
2013-12-29	03:30:00	2013-12-29 03:30:00	66.7	14.4804	17.09	62.9231	12.4674	17.05	101.736	19.5998	16.51	75.4455	19.1391	16.52	69.12	20.2291	16.5	66.43	21.8744	16.49
2013-12-29	03:45:00	2013-12-29 03:45:00	61.7	13.4682	17.16	56.6231	10.8541	17.11	97.7364	19.1857	16.57	72.1455	18.6547	16.52	65.12	19.8964	16.52	63.63	21.7138	16.5
2013-12-29	04:00:00	2013-12-29 04:00:00	57.9	12.4251	17.25	53.7231	10.7757	17.2	94.2364	18.8735	16.62	67.1455	17.7135	16.55	61.52	19.4571	16.6	59.13	21.5229	16.57
2013-12-29	04:15:00	2013-12-29 04:15:00	55.8	11.4363	17.31	53.2231	10.1339	17.26	91.5364	18.5809	16.65	65.8455	17.9996	16.59	58.22	18.9638	16.68	56.73	21.3128	16.65
2013-12-29	04:30:00	2013-12-29 04:30:00	53.6	10.6084	17.35	49.6231	9.2161	17.3	87.6364	18.3078	16.68	65.3455	17.5312	16.62	55.42	18.611	16.73	58.63	21.1084	16.7
2013-12-29	04:45:00	2013-12-29 04:45:00	52.7	9.84794	17.39	49.0231	9.02515	17.32	87.6364	18.0432	16.71	63.0455	17.7653	16.66	55.02	18.3569	16.77	54.73	20.9042	16.74
2013-12-29	05:00:00	2013-12-29 05:00:00	57.2	9.20319	17.42	53.9231	8.62627	17.34	92.2364	17.6999	16.77	68.9455	18.7039	16.69	60.12	18.1959	16.8	60.53	20.7111	16.74
2013-12-29	05:15:00	2013-12-29 05:15:00	61.7	8.71621	17.42	58.6231	8.30822	17.35	95.0364	17.4659	16.79	75.4455	16.5624	16.72	61.32	18.316	16.82	63.13	20.5154	16.73
2013-12-29	05:30:00	2013-12-29 05:30:00	65.3	8.46712	17.41	61.7231	7.57845	17.38	99.5364	17.3409	16.79	76.5455	16.6653	16.71	68.12	18.4225	16.81	67.83	20.364	16.72
2013-12-29	05:45:00	2013-12-29 05:45:00	68.3	8.24933	17.4	65.3231	7.43367	17.39	103.536	17.2974	16.77	79.7455	15.24	16.77	70.32	18.3788	16.8	74.73	20.2374	16.64
2013-12-29	06:00:00	2013-12-29 06:00:00	74.9	8.05244	17.39	74.4231	7.9146	17.35	109.436	17.3083	16.77	86.1455	15.9837	16.8	77.52	19.1939	16.73	80.73	20.1163	16.63
2013-12-29	06:15:00	2013-12-29 06:15:00	73.1	7.94011	17.38	69.9231	8.36714	17.33	110.536	17.2512	16.78	85.4455	16.836	16.7	78.52	19.6327	16.68	79.63	20.0201	16.68
2013-12-29	06:30:00	2013-12-29 06:30:00	75.3	8.30822	17.29	72.0231	15.2454	16.98	111.636	17.1996	16.79	87.7455	16.733	16.66	77.12	19.8359	16.67	79.43	19.9513	16.7
2013-12-29	06:45:00	2013-12-29 06:45:00	77.1	10.035	16.93	74.2231	17.1996	16.76	113.936	17.1182	16.8	89.2455	17.3844	16.63	79.62	19.8909	16.67	80.83	19.8909	16.7
2013-12-29	07:00:00	2013-12-29 07:00:00	81.8	11.5941	16.81	79.0231	17.6183	16.69	114.736	17.2648	16.77	93.8455	17.2349	16.62	86.22	19.9431	16.67	87.13	19.8497	16.7
2013-12-29	07:15:00	2013-12-29 07:15:00	83.9	12.8198	16.77	79.8231	17.7571	16.68	120.236	17.5285	16.73	96.3455	18.0432	16.6	88.62	20.0338	16.7	90.73	19.8167	16.7
2013-12-29	07:30:00	2013-12-29 07:30:00	88.2	13.7454	16.76	88.8231	17.8851	16.67	122.636	17.9287	16.68	98.8455	17.3681	16.57	90.92	20.2264	16.73	92.93	19.7947	16.69
2013-12-29	07:45:00	2013-12-29 07:45:00	97.3	14.2502	16.81	92.4231	18.0595	16.67	130.636	17.9996	16.69	107.745	18.499	16.57	98.82	20.3585	16.74	98.83	19.803	16.72
2013-12-29	08:00:00	2013-12-29 08:00:00	101.3	14.7431	16.81	102.623	18.387	16.64	137.936	18.0186	16.7	117.645	17.8878	16.61	105.82	20.4521	16.75	107.03	19.8084	16.77
2013-12-29	08:15:00	2013-12-29 08:15:00	108.9	15.1835	16.75	105.523	18.4607	16.61	145.036	18.4771	16.67	118.845	17.8116	16.63	108.12	20.7414	16.8	115.03	19.8332	16.74
2013-12-29	08:30:00	2013-12-29 08:30:00	113.2	15.5576	16.74	112.523	18.6575	16.62	149.236	18.7805	16.66	125.345	18.3542	16.67	111.82	21.1857	16.79	112.83	19.9046	16.72
2013-12-29	08:45:00	2013-12-29 08:45:00	114.6	16.0188	16.68	115.723	19.0515	16.61	151.136	19.0843	16.68	121.745	18.8872	16.69	114.22	21.8771	16.78	122.93	19.9541	16.72
2013-12-29	09:00:00	2013-12-29 09:00:00	123.2	16.5028	16.63	117.623	19.2569	16.61	153.136	19.4159	16.72	127.945	18.0132	16.72	118.22	22.0461	16.77	128.73	20.0201	16.71
2013-12-29	09:15:00	2013-12-29 09:15:00	123.4	16.9174	16.62	114.123	19.5065	16.6	155.136	19.6382	16.71	136.945	18.5099	16.71	121.12	22.1597	16.76	121.23	20.0916	16.69
2013-12-29	09:30:00	2013-12-29 09:30:00	120.7	17.2838	16.62	114.123	19.8606	16.59	150.536	19.7755	16.71	129.945	19.2076	16.71	114.62	22.229	16.76	125.13	20.1686	16.68
2013-12-29	09:45:00	2013-12-29 09:45:00	118.4	17.5883	16.62	118.223	19.8222	16.59	153.736	19.8606	16.72	128.345	18.9502	16.72	121.12	22.2706	16.76	122.43	20.2594	16.69
2013-12-29	10:00:00	2013-12-29 10:00:00	125.7	17.8225	16.64	117.523	19.8661	16.59	157.736	19.9513	16.74	134.745	18.994	16.72	128.02	22.3178	16.77	124.43	20.3557	16.69
2013-12-29	10:15:00	2013-12-29 10:15:00	127.3	18.0023	16.65	122.723	19.9156	16.61	164.636	20.2456	16.73	142.545	19.512	16.7	122.72	22.3011	16.78	134.03	20.4714	16.67
2013-12-29	10:30:00	2013-12-29 10:30:00	123.8	18.1714	16.65	119.723	19.9513	16.63	160.236	20.4411	16.72	136.845	19.8167	16.67	132.02	22.4898	16.78	131.93	20.5568	16.65
2013-12-29	10:45:00	2013-12-29 10:45:00	122.5	18.3051	16.66	127.323	19.9568	16.63	163.336	20.7414	16.68	136.945	19.1199	16.64	128.32	22.5564	16.79	131.13	20.6477	16.63
2013-12-29	11:00:00	2013-12-29 11:00:00	137.4	18.4443	16.65	138.123	19.9513	16.63	178.536	21.067	16.65	149.445	20.6505	16.62	138.72	22.7897	16.76	146.13	20.7469	16.63
2013-12-29	11:15:00	2013-12-29 11:15:00	139.5	18.6711	16.63	126.323	20.8049	16.6	169.936	21.6834	16.6	157.245	21.6695	16.58	140.02	23.0955	16.69	145.13	20.8738	16.61
2013-12-29	11:30:00	2013-12-29 11:30:00	136.9	18.9365	16.62	134.223	21.6059	16.58	172.336	21.9242	16.58	153.645	20.8517	16.57	144.82	23.2846	16.66	136.23	20.9787	16.61
2013-12-29	11:45:00	2013-12-29 11:45:00	133.6	19.3337	16.59	143.023	21.9547	16.55	176.836	22.1071	16.58	150.845	20.8876	16.57	143.82	23.4099	16.67	147.13	21.0808	16.6
2013-12-29	12:00:00	2013-12-29 12:00:00	136.3	19.6904	16.6	139.623	22.1569	16.53	172.436	22.3511	16.57	151.245	20.2346	16.57	143.82	23.5213	16.71	148.73	21.1995	16.62
2013-12-29	12:15:00	2013-12-29 12:15:00	135.6	19.9486	16.61	135.323	22.2152	16.53	167.936	22.3927	16.57	145.945	21.8024	16.57	140.52	23.655	16.72	139.93	21.2879	16.64
2013-12-29	12:30:00	2013-12-29 12:30:00	138.9	20.1631	16.61	133.323	22.3095	16.53	170.836	22.3732	16.6	142.845	20.9621	16.61	141.22	23.7359	16.73	135.93	21.3902	16.68
2013-12-29	12:45:00	2013-12-29 12:45:00	136.9	20.397	16.58	134.623	22.3927	16.53	167.736	22.315	16.65	149.245	20.5981	16.63	137.12	23.6996	16.77	133.33	21.5008	16.7
2013-12-29	13:00:00	2013-12-29 13:00:00	131.3	20.6587	16.57	130.823	22.4232	16.53	171.536	22.2845	16.68	147.945	20.4769	16.63	140.82	23.5324	16.79	137.53	21.5893	16.72
2013-12-29	13:15:00	2013-12-29 13:15:00	127.3	20.8076	16.58	121.323	22.5037	16.53	166.636	22.2207	16.68	137.945	20.9759	16.66	129.82	23.4238	16.79	134.53	21.6474	16.74
2013-12-29	13:30:00	2013-12-29 13:30:00	127.9	20.9704	16.57	125.223	22.6008	16.54	158.136	22.096	16.69	137.145	21.8993	16.69	127.62	23.4043	16.79	128.03	21.7359	16.77
2013-12-29	13:45:00	2013-12-29 13:45:00	117.8	21.1195	16.58	115.623	21.1415	16.64	153.936	21.9879	16.7	129.245	19.2898	16.72	122.62	23.3876	16.78	116.93	21.7968	16.75
2013-12-29	14:00:00	2013-12-29 14:00:00	113.2	21.1857	16.63	109.123	21.8854	16.76	147.836	21.8411	16.72	121.945	18.5454	16.83	111.42	23.1539	16.8	117.13	21.8217	16.87
2013-12-29	14:15:00	2013-12-29 14:15:00	103.6	21.0035	16.74	100.323	18.9173	16.88	139.036	21.6889	16.73	113.845	19.0569	16.89	106.72	22.6952	16.86	107.23	21.7802	17.03
2013-12-29	14:30:00	2013-12-29 14:30:00	99	20.5816	16.88	95.4231	17.5475	17.17	134.836	21.6142	16.75	109.445	18.8735	16.88	104.22	22.0655	16.94	101.73	21.7138	17.15
2013-12-29	14:45:00	2013-12-29 14:45:00	94	19.8881	17.03	88.1231	15.6115	17.33	129.536	21.3377	16.8	102.545	18.57	16.91	95.82	21.7442	16.99	92.33	21.7249	17.2
2013-12-29	15:00:00	2013-12-29 15:00:00	90.9	18.8079	17.23	85.5231	14.1246	17.47	126.436	20.1933	17	101.845	17.6428	17.06	95.72	21.0698	17.1	94.53	21.6557	17.26
2013-12-29	15:15:00	2013-12-29 15:15:00	89.1	17.4768	17.43	86.7231	13.2633	17.53	124.436	18.4552	17.29	96.9455	17.0693	17.2	93.02	19.6547	17.27	93.83	21.5257	17.42
2013-12-29	15:30:00	2013-12-29 15:30:00	87	16.4135	17.5	90.6231	12.2982	17.64	123.436	17.3001	17.51	97.1455	16.3918	17.3	92.62	18.6629	17.38	96.43	21.4068	17.46
2013-12-29	15:45:00	2013-12-29 15:45:00	90.2	15.5549	17.56	89.4231	15.722	17.43	126.636	16.6571	17.52	102.145	15.687	17.35	91.12	18.1304	17.42	96.53	21.2686	17.52
2013-12-29	16:00:00	2013-12-29 16:00:00	91.6	15.0599	17.51	90.1231	17.9423	17.27	126.636	14.8719	17.58	101.445	15.8029	17.3	94.92	17.8116	17.45	95.23	21.1526	17.52
2013-12-29	16:15:00	2013-12-29 16:15:00	92.7	14.6332	17.55	88.8231	20.3585	16.93	124.536	14.3091	17.6	103.245	15.154	17.4	98.62	17.5938	17.51	98.43	21.009	17.54
2013-12-29	16:30:00	2013-12-29 16:30:00	89.7	15.025	17.28	89.1231	21.0946	16.83	123.936	13.9402	17.58	99.6455	13.8575	17.53	93.02	17.2702	17.54	91.83	20.838	17.56
2013-12-29	16:45:00	2013-12-29 16:45:00	90.6	15.8056	17.1	85.2231	21.8937	16.78	125.536	13.7587	17.58	101.245	11.8389	17.67	90.52	16.9309	17.59	94.73	20.6449	17.55
2013-12-29	17:00:00	2013-12-29 17:00:00	89.7	16.5407	17.02	87.1231	22.3788	16.75	124.536	15.1459	17.49	101.045	9.94404	17.77	91.52	16.6707	17.61	92.83	20.4053	17.56
2013-12-29	17:15:00	2013-12-29 17:15:00	92	17.4279	16.9	88.2231	22.7647	16.72	126.536	15.025	17.49	104.945	10.8751	17.7	94.12	15.3799	17.63	96.43	20.1356	17.59
2013-12-29	17:30:00	2013-12-29 17:30:00	94.7	18.417	16.79	91.5231	22.8536	16.71	129.336	13.4416	17.61	105.445	12.0974	17.62	94.72	13.4523	17.67	96.23	19.8304	17.58
2013-12-29	17:45:00	2013-12-29 17:45:00	98.5	19.2131	16.79	96.1231	22.8758	16.72	133.336	12.0156	17.67	110.845	14.2636	17.44	100.62	12.3193	17.68	107.23	19.5065	17.6
2013-12-29	18:00:00	2013-12-29 18:00:00	96.1	19.8332	16.8	95.4231	22.6064	16.75	135.336	12.1027	17.6	114.945	14.837	17.36	102.22	12.4225	17.64	104.13	19.224	17.56
2013-12-29	18:15:00	2013-12-29 18:15:00	104.5	20.2236	16.85	98.9231	22.8675	16.75	138.736	11.9866	17.57	114.245	14.9498	17.37	107.32	13.0507	17.59	106.53	19.0022	17.51
2013-12-29	18:30:00	2013-12-29 18:30:00	105.8	20.3695	16.89	105.223	22.8897	16.76	140.536	12.3643	17.51	119.745	14.9229	17.38	106.42	12.7111	17.54	113.33	18.786	17.44
2013-12-29	18:45:00	2013-12-29 18:45:00	111	20.1713	17	106.623	22.798	16.77	147.236	12.9233	17.46	119.445	14.8021	17.37	110.82	13.8094	17.5	108.83	18.5509	17.41
2013-12-29	19:00:00	2013-12-29 19:00:00	108.1	19.8304	17.08	109.723	23.0037	16.78	148.036	13.9536	17.4	124.045	15.4526	17.32	110.62	14.5903	17.44	120.33	18.3569	17.4
2013-12-29	19:15:00	2013-12-29 19:15:00	113.6	19.501	17.12	115.723	23.0676	16.76	153.936	15.1163	17.3	124.245	15.9621	17.2	120.32	15.4014	17.4	119.93	18.1604	17.36
2013-12-29	19:30:00	2013-12-29 19:30:00	116.4	19.2871	17.11	117.223	22.6813	16.8	153.636	15.8488	17.17	130.145	16.1782	17.16	119.22	15.6843	17.32	122.13	18.065	17.24
2013-12-29	19:45:00	2013-12-29 19:45:00	120	19.2049	17.06	117.723	23.0204	16.79	153.936	16.0269	17.12	130.345	16.2972	17.13	123.82	16.3107	17.24	123.53	17.975	17.19
2013-12-29	20:00:00	2013-12-29 20:00:00	125.9	18.8325	17.08	125.923	23.0565	16.78	156.936	16.1539	17.1	134.445	16.3026	17.1	125.72	16.4432	17.19	129.03	17.8851	17.15
2013-12-29	20:15:00	2013-12-29 20:15:00	126.6	18.775	17.05	123.723	23.2234	16.76	162.836	16.2945	17.08	139.045	16.3134	17.09	129.12	16.6436	17.15	130.73	17.8116	17.11
2013-12-29	20:30:00	2013-12-29 20:30:00	133.6	18.994	16.97	129.323	23.2986	16.76	165.436	16.2269	17.05	142.545	16.7466	17.08	134.82	17.0964	17.12	139.53	17.7789	17.08
2013-12-29	20:45:00	2013-12-29 20:45:00	138.1	19.0706	16.95	135.323	23.2234	16.76	168.336	16.4405	17.04	148.445	18.3023	17.02	138.12	17.3599	17.07	138.23	17.738	17.03
2013-12-29	21:00:00	2013-12-29 21:00:00	138.9	19.2131	16.93	142.823	22.9787	16.77	179.736	16.8604	16.99	150.945	17.6319	16.97	142.52	17.3708	17.04	144.43	17.7271	17
2013-12-29	21:15:00	2013-12-29 21:15:00	144.6	19.3145	16.92	144.723	22.7675	16.79	184.936	17.3001	16.95	157.945	17.9587	16.97	154.52	18.0214	16.99	146.53	17.768	16.96
2013-12-29	21:30:00	2013-12-29 21:30:00	148	19.479	16.89	145.123	22.8425	16.8	183.136	17.4061	16.95	158.145	18.2505	16.97	148.82	18.0541	16.98	156.03	17.8007	16.95
2013-12-29	21:45:00	2013-12-29 21:45:00	149.2	19.7398	16.87	149.723	23.2123	16.78	185.636	17.485	16.95	159.245	18.1386	16.97	148.42	17.7952	16.97	149.23	17.8442	16.94
2013-12-29	22:00:00	2013-12-29 22:00:00	145.9	20.0118	16.86	154.223	23.3682	16.79	190.936	17.504	16.95	162.445	17.4252	16.98	158.12	18.0132	16.96	159.13	17.8987	16.94
2013-12-29	22:15:00	2013-12-29 22:15:00	161.5	20.2759	16.85	151.423	23.4795	16.8	188.836	17.504	16.95	170.345	17.67	16.97	160.62	18.1195	16.97	161.63	17.9669	16.95
2013-12-29	22:30:00	2013-12-29 22:30:00	154.8	20.6036	16.84	157.423	23.5213	16.81	193.936	17.5231	16.94	167.945	17.8361	16.97	153.52	18.095	16.96	159.83	18.0377	16.95
2013-12-29	22:45:00	2013-12-29 22:45:00	158	20.9069	16.85	151.223	23.5185	16.81	192.236	17.6264	16.93	165.545	17.7625	16.97	157.02	18.652	16.95	156.23	18.1059	16.95
2013-12-29	23:00:00	2013-12-29 23:00:00	151.7	21.1581	16.86	150.723	23.4684	16.82	193.836	17.6346	16.91	161.845	17.6727	16.97	158.52	18.6411	16.95	161.33	18.1877	16.93
2013-12-29	23:15:00	2013-12-29 23:15:00	155.5	21.3322	16.86	152.823	23.4155	16.83	187.136	17.6537	16.9	160.545	17.5557	16.96	153.12	18.8899	16.94	152.53	18.2396	16.91
2013-12-29	23:30:00	2013-12-29 23:30:00	148.9	21.487	16.87	147.023	23.3709	16.83	182.736	17.6645	16.9	161.445	17.2811	16.96	149.62	18.8079	16.93	154.53	18.2832	16.89
2013-12-29	23:45:00	2013-12-29 23:45:00	144.7	21.6114	16.87	143.023	22.9342	16.86	179.836	17.6645	16.9	156.145	17.9096	16.98	147.72	19.1254	16.91	144.23	18.3406	16.86
2013-12-30	00:00:00	2013-12-30	143.5	21.7249	16.87	137.723	22.8703	16.87	174.036	17.6863	16.89	151.045	20.2511	16.99	147.32	18.5235	16.89	148.23	18.3842	16.86
2013-12-30	00:15:00	2013-12-30 00:15:00	134.2	21.7858	16.88	132.623	22.462	16.88	170.336	17.7925	16.88	148.145	18.0132	16.99	138.12	19.309	16.89	137.13	18.4034	16.85
2013-12-30	00:30:00	2013-12-30 00:30:00	129	21.8217	16.89	125.923	21.5782	16.9	164.736	17.8225	16.88	142.345	17.3898	16.92	133.62	19.1802	16.88	132.13	18.4252	16.85
2013-12-30	00:45:00	2013-12-30 00:45:00	123.4	21.5976	16.91	120.623	21.9657	16.91	160.736	17.8225	16.88	136.245	17.4959	16.95	128.42	19.161	16.87	128.23	18.3952	16.79
2013-12-30	01:00:00	2013-12-30 01:00:00	116.6	21.1913	16.92	115.323	19.1775	16.9	152.236	17.817	16.87	129.945	16.7655	16.83	122.62	18.7805	16.86	123.53	18.4143	16.73
2013-12-30	01:15:00	2013-12-30 01:15:00	112.9	20.8021	16.92	110.623	18.6739	16.89	148.736	17.504	16.85	122.345	15.9513	16.8	115.92	18.9283	16.85	115.73	18.3351	16.83
2013-12-30	01:30:00	2013-12-30 01:30:00	106.3	19.792	16.96	102.823	17.3953	16.92	141.136	17.3164	16.87	116.745	15.8056	16.87	110.42	18.1741	16.9	109.43	18.3214	16.94
2013-12-30	01:45:00	2013-12-30 01:45:00	100.6	18.5727	17.04	97.5231	15.7517	16.98	136.336	17.091	16.94	109.945	15.6735	16.89	102.82	17.896	16.97	101.83	18.2614	16.97
2013-12-30	02:00:00	2013-12-30 02:00:00	94	17.4741	17.08	91.3231	14.9632	17.02	130.336	16.7845	16.99	105.845	15.5091	16.87	97.62	17.6945	17.04	97.73	18.2068	17.02
2013-12-30	02:15:00	2013-12-30 02:15:00	87.1	16.3594	17.14	84.3231	13.8148	17.06	124.236	16.5651	17	97.5455	15.5684	16.88	91.32	18.2368	17.09	92.33	18.1304	17.05
2013-12-30	02:30:00	2013-12-30 02:30:00	81.1	15.0841	17.21	78.2231	12.203	17.14	118.236	16.3945	17	92.1455	15.4553	16.88	85.22	17.3953	17.14	84.33	18.065	17.1
2013-12-30	02:45:00	2013-12-30 02:45:00	74.8	13.9536	17.27	70.6231	11.7178	17.19	111.636	15.8299	16.98	85.3455	15.3288	16.9	78.72	17.5258	17.13	76.73	18.0186	17.09
2013-12-30	03:00:00	2013-12-30 03:00:00	68.6	12.8702	17.32	63.9231	11.242	17.22	104.836	15.0088	16.93	77.7455	14.4162	16.88	72.22	16.752	17.07	70.83	17.8906	16.99
2013-12-30	03:15:00	2013-12-30 03:15:00	63.5	11.7625	17.36	59.1231	11.41	17.25	99.5364	14.4938	16.89	71.9455	15.119	16.89	66.62	15.6412	17.05	64.63	17.8007	16.97
2013-12-30	03:30:00	2013-12-30 03:30:00	58.1	10.6789	17.42	53.2231	10.1026	17.29	94.0364	14.1219	16.87	66.0455	14.6251	16.86	62.12	16.054	17.08	58.93	17.7108	16.98
2013-12-30	03:45:00	2013-12-30 03:45:00	53.1	9.62485	17.45	46.9231	8.70079	17.34	88.9364	13.5854	16.88	59.5455	14.3573	16.84	56.72	16.1512	17.07	53.13	17.6019	16.98
2013-12-30	04:00:00	2013-12-30 04:00:00	48.2	8.58774	17.48	41.4231	6.5347	17.37	84.4364	12.788	16.88	53.8455	14.0417	16.82	51.62	15.0223	17.04	47.23	17.4632	16.94
2013-12-30	04:15:00	2013-12-30 04:15:00	43.7	7.68782	17.49	36.2231	4.30682	17.44	79.2364	11.6125	16.89	47.9455	13.5721	16.81	48.12	14.3921	17.02	41.23	17.3355	16.91
2013-12-30	04:30:00	2013-12-30 04:30:00	39.8	6.81399	17.49	31.0231	3.3829	17.43	75.0364	10.53	16.94	43.4455	12.4066	16.79	43.22	13.4869	17.01	36.93	17.1969	16.86
2013-12-30	04:45:00	2013-12-30 04:45:00	36	5.93915	17.49	26.8231	2.55354	17.42	71.0364	9.46429	17.01	38.8455	10.7966	16.85	39.42	13.4975	16.99	32.23	17.0503	16.81
2013-12-30	05:00:00	2013-12-30 05:00:00	32.7	5.04757	17.49	22.4231	1.97946	17.38	67.7364	8.3492	17.05	34.9455	9.24709	16.95	36.52	13.3644	16.95	28.53	16.8902	16.75
2013-12-30	05:15:00	2013-12-30 05:15:00	30.1	4.22189	17.49	19.4231	1.42534	17.34	65.0364	7.23845	17.07	31.3455	8.38251	17	33.02	12.8755	16.91	24.73	16.733	16.69
2013-12-30	05:30:00	2013-12-30 05:30:00	27.6	3.53561	17.5	15.5231	1.04992	17.3	61.8364	5.97156	17.08	27.4455	7.4946	17.04	30.02	12.5204	16.85	21.73	16.5786	16.65
2013-12-30	05:45:00	2013-12-30 05:45:00	25	2.96116	17.5	13.0231	0.813873	17.25	58.9364	4.98855	17.07	25.2455	6.34403	17.06	28.92	12.5416	16.78	18.13	16.427	16.6
2013-12-30	06:00:00	2013-12-30 06:00:00	23	2.51398	17.47	10.7231	0.702002	17.17	57.3364	4.34813	17.04	23.0455	5.51419	17.06	25.32	11.2971	16.68	16.33	16.2755	16.53
2013-12-30	06:15:00	2013-12-30 06:15:00	21.2	2.15571	17.42	9.12308	0.647632	17.05	54.9364	3.84743	17	20.7455	4.83146	17.04	22.72	10.9877	16.6	13.93	16.1377	16.45
2013-12-30	06:30:00	2013-12-30 06:30:00	19.1	1.86114	17.37	6.92308	0.597768	16.98	52.6364	3.46634	16.97	19.1455	4.45518	16.97	20.62	10.3709	16.54	11.73	15.9972	16.35
2013-12-30	06:45:00	2013-12-30 06:45:00	17.8	1.61961	17.3	5.72308	0.57296	16.88	50.9364	3.16435	16.94	17.5455	4.16614	16.83	18.82	9.28326	16.47	10.43	15.8326	16.22
2013-12-30	07:00:00	2013-12-30 07:00:00	17.1	1.4209	17.25	6.42308	0.568833	16.74	49.9364	2.87408	16.92	18.7455	3.96791	16.75	17.82	7.30685	16.43	11.93	15.6789	16.1
2013-12-30	07:15:00	2013-12-30 07:15:00	16.6	1.25516	17.2	7.72308	0.589489	16.49	49.0364	2.59781	16.91	19.9455	3.55474	16.74	16.12	6.19383	16.4	13.23	15.5415	15.98
2013-12-30	07:30:00	2013-12-30 07:30:00	17.4	1.12163	17.15	11.1231	0.589489	16.35	49.5364	2.36089	16.9	24.1455	3.23312	16.69	16.12	5.77981	16.34	17.33	15.3853	15.89
2013-12-30	07:45:00	2013-12-30 07:45:00	19.4	1.01314	17.12	15.6231	0.587421	16.28	51.3364	2.15571	16.89	27.8455	3.01067	16.72	18.72	5.27923	16.28	21.53	15.0545	15.93
2013-12-30	08:00:00	2013-12-30 08:00:00	23	0.922712	17.11	20.5231	0.622659	16.2	54.4364	2.01827	16.9	33.6455	2.87643	16.78	21.42	4.53072	16.28	26.63	14.88	15.83
2013-12-30	08:15:00	2013-12-30 08:15:00	28	0.847899	17.11	26.2231	0.905567	16.08	58.4364	1.88839	16.89	39.4455	3.85224	16.89	24.72	4.41136	16.29	32.93	14.727	16.16
2013-12-30	08:30:00	2013-12-30 08:30:00	32.5	0.786311	17.08	30.7231	0.980763	15.94	62.8364	1.809	16.88	44.1455	9.85313	16.95	29.82	6.02644	16.12	37.83	14.5956	16.5
2013-12-30	08:45:00	2013-12-30 08:45:00	37.7	0.733527	16.99	36.2231	0.727213	15.73	68.8364	5.25701	16.79	50.4455	12.3431	16.97	35.92	8.50817	16.19	44.03	14.4563	16.68
2013-12-30	09:00:00	2013-12-30 09:00:00	43.6	0.695711	16.77	43.1231	9.7571	16.31	75.5364	8.04223	16.84	57.1455	13.8441	16.96	43.22	9.34788	16.35	50.33	14.4697	16.81
2013-12-30	09:15:00	2013-12-30 09:15:00	50.6	0.704101	16.41	49.8231	15.1325	16.51	82.9364	9.27551	16.86	63.6455	14.6519	16.95	51.32	9.28326	16.46	57.63	14.5608	16.87
2013-12-30	09:30:00	2013-12-30 09:30:00	57.9	0.982918	16.3	56.2231	14.99	16.4	90.5364	10.1911	16.88	71.0455	15.0115	16.91	58.82	9.40995	16.53	63.43	14.6493	16.87
2013-12-30	09:45:00	2013-12-30 09:45:00	64.2	1.91795	16.31	62.9231	15.4203	16.45	97.3364	12.1001	16.9	77.3455	16.0134	16.88	67.42	12.0552	16.58	69.53	14.7833	16.81
2013-12-30	10:00:00	2013-12-30 10:00:00	71.4	3.4926	16.24	70.9231	13.7107	16.41	105.536	12.8596	16.91	85.0455	16.4378	16.85	73.32	14.8746	16.7	77.43	14.9927	16.77
2013-12-30	10:15:00	2013-12-30 10:15:00	79.6	4.94924	16.24	76.8231	16.5163	16.52	112.536	12.9153	16.89	90.8455	16.8062	16.81	81.12	15.9217	16.74	83.93	15.2454	16.77
2013-12-30	10:30:00	2013-12-30 10:30:00	85	6.24887	16.38	84.8231	18.9419	16.69	121.036	12.9392	16.88	97.5455	17.1535	16.76	86.92	16.0323	16.73	91.83	15.493	16.73
2013-12-30	10:45:00	2013-12-30 10:45:00	91.1	8.10355	16.63	89.6231	19.383	16.73	125.836	13.4549	16.88	102.145	17.5394	16.72	92.22	16.0675	16.72	97.93	15.7625	16.7
2013-12-30	11:00:00	2013-12-30 11:00:00	97.6	9.99602	16.7	96.1231	19.49	16.74	132.036	13.5695	16.82	108.245	18.6055	16.71	100.62	15.8569	16.7	101.03	16.0242	16.7
2013-12-30	11:15:00	2013-12-30 11:15:00	104	11.7836	16.74	101.623	19.8442	16.76	135.436	13.5748	16.69	114.045	18.3569	16.7	102.52	16.0783	16.69	107.73	16.2647	16.68
2013-12-30	11:30:00	2013-12-30 11:30:00	106	13.3085	16.74	103.123	19.9458	16.78	141.236	14.0604	16.66	115.545	17.553	16.69	109.62	17.5312	16.69	111.93	16.5109	16.66
2013-12-30	11:45:00	2013-12-30 11:45:00	111.2	14.5126	16.72	106.223	20.1026	16.79	144.736	14.8182	16.63	120.845	17.7653	16.69	112.92	18.1168	16.7	115.53	16.7222	16.65
2013-12-30	12:00:00	2013-12-30 12:00:00	111.2	15.4445	16.73	110.723	20.2676	16.79	147.636	15.0062	16.65	122.545	17.8987	16.67	117.52	18.693	16.71	115.63	16.9201	16.65
2013-12-30	12:15:00	2013-12-30 12:15:00	108.7	16.1377	16.75	107.423	20.2869	16.8	147.236	15.423	16.66	122.445	17.9369	16.63	112.32	19.3145	16.72	113.63	17.1046	16.65
2013-12-30	12:30:00	2013-12-30 12:30:00	110.8	16.8008	16.8	111.323	20.0283	16.8	145.336	15.6169	16.66	121.545	16.8658	16.61	112.72	19.5366	16.73	117.43	17.2784	16.67
2013-12-30	12:45:00	2013-12-30 12:45:00	111.5	17.5611	16.87	108.623	20.1466	16.82	145.236	15.749	16.67	124.345	16.7005	16.59	114.02	19.63	16.74	114.23	17.417	16.69
2013-12-30	13:00:00	2013-12-30 13:00:00	109.1	18.1632	16.89	107.123	20.2979	16.84	143.936	15.8407	16.7	120.145	15.5927	16.6	110.42	19.7041	16.75	112.93	17.5666	16.71
2013-12-30	13:15:00	2013-12-30 13:15:00	108.4	18.6629	16.92	107.423	20.1136	16.86	143.036	15.9999	16.72	118.245	16.2566	16.57	109.82	19.5751	16.77	111.93	17.6999	16.72
2013-12-30	13:30:00	2013-12-30 13:30:00	108.9	19.0213	16.92	106.423	20.3034	16.87	143.736	16.1269	16.73	117.145	16.0999	16.55	109.32	19.5037	16.8	112.13	17.8116	16.72
2013-12-30	13:45:00	2013-12-30 13:45:00	107.3	19.2514	16.94	104.323	20.0668	16.87	140.936	16.2755	16.74	118.045	16.0026	16.54	107.52	19.3666	16.82	113.13	17.8933	16.73
2013-12-30	14:00:00	2013-12-30 14:00:00	107.8	19.4187	16.94	102.523	20.3419	16.9	139.936	16.4649	16.75	116.045	15.865	16.54	108.32	20.2208	16.84	111.83	17.9832	16.73
2013-12-30	14:15:00	2013-12-30 14:15:00	102.2	19.512	16.95	101.623	20.2401	16.9	140.136	16.6896	16.76	114.445	16.0188	16.5	103.92	18.9721	17.03	107.73	18.0623	16.74
2013-12-30	14:30:00	2013-12-30 14:30:00	103.6	19.5449	16.95	101.123	20.0063	16.91	135.736	16.8957	16.78	111.945	15.9271	16.48	104.22	18.8735	17.04	105.63	18.1304	16.7
2013-12-30	14:45:00	2013-12-30 14:45:00	97.8	19.5613	16.96	95.8231	20.1411	16.94	134.336	17.0883	16.78	110.145	16.2593	16.48	102.12	19.2871	16.98	103.23	18.185	16.7
2013-12-30	15:00:00	2013-12-30 15:00:00	96.7	19.5943	16.99	95.2231	20.0861	16.93	132.436	17.2132	16.78	108.245	15.9513	16.47	98.32	19.224	16.94	101.83	18.2423	16.72
2013-12-30	15:15:00	2013-12-30 15:15:00	92.7	19.5476	17.01	90.5231	20.1383	16.93	130.636	17.2974	16.77	105.345	16.6165	16.51	97.02	19.2432	16.91	97.43	18.2832	16.72
2013-12-30	15:30:00	2013-12-30 15:30:00	90.9	19.5037	17.05	88.1231	19.8579	16.94	125.936	17.3273	16.78	99.9455	16.2296	16.54	94.02	18.9392	16.9	95.03	18.2942	16.8
2013-12-30	15:45:00	2013-12-30 15:45:00	88.6	19.2898	17.06	85.9231	19.7892	16.98	124.036	17.349	16.78	99.0455	16.7303	16.6	91.32	19.4159	16.9	93.83	18.3214	16.91
2013-12-30	16:00:00	2013-12-30 16:00:00	83.8	19.1473	17.07	82.4231	19.8002	17.01	122.036	17.3789	16.79	96.2455	16.3864	16.61	88.42	19.3775	16.89	89.43	18.3515	16.92
2013-12-30	16:15:00	2013-12-30 16:15:00	81.1	18.994	17.13	78.3231	19.8497	17.04	117.836	17.4061	16.79	93.0455	16.5867	16.62	84.62	19.4022	16.9	85.63	18.3597	16.97
2013-12-30	16:30:00	2013-12-30 16:30:00	77.1	18.8872	17.16	75.2231	19.5613	17.07	113.436	17.4279	16.8	89.1455	16.7845	16.63	81.12	19.4845	16.89	84.63	18.3733	16.98
2013-12-30	16:45:00	2013-12-30 16:45:00	77.5	18.3842	17.26	75.6231	19.8112	17.08	112.136	17.4442	16.81	89.5455	17.0774	16.71	79.02	19.7096	16.9	80.83	18.3733	17.02
2013-12-30	17:00:00	2013-12-30 17:00:00	74.6	17.8906	17.31	71.3231	19.6711	17.09	110.736	17.4632	16.82	86.2455	17.5503	16.7	78.92	19.2076	16.96	78.43	18.3815	17.04
2013-12-30	17:15:00	2013-12-30 17:15:00	74.6	17.4333	17.33	71.4231	19.4927	17.11	109.636	17.4823	16.83	84.5455	16.1458	16.8	77.92	18.7641	17.06	78.63	18.3624	17.04
2013-12-30	17:30:00	2013-12-30 17:30:00	74.1	17.2594	17.32	70.6231	19.5284	17.12	108.936	17.4959	16.84	84.5455	17.1616	16.84	75.02	18.3597	17.14	78.93	18.3815	17.03
2013-12-30	17:45:00	2013-12-30 17:45:00	75.5	17.2241	17.3	72.8231	19.5833	17.12	110.336	17.5176	16.84	87.1455	16.3161	16.82	76.92	18.1141	17.17	80.13	18.3815	17.03
2013-12-30	18:00:00	2013-12-30 18:00:00	76.9	17.292	17.26	75.1231	19.6053	17.11	112.336	17.5339	16.85	88.8455	16.5596	16.84	81.42	17.9996	17.18	81.03	18.3761	17.02
2013-12-30	18:15:00	2013-12-30 18:15:00	78	17.4034	17.25	76.1231	19.6162	17.11	114.036	17.5421	16.86	89.9455	16.4351	16.84	81.52	17.8007	17.17	83.93	18.3897	16.97
2013-12-30	18:30:00	2013-12-30 18:30:00	83.4	17.5013	17.25	80.5231	19.6766	17.1	117.436	17.5557	16.88	94.9455	16.3053	16.81	85.62	17.4687	17.14	88.13	18.3952	16.91
2013-12-30	18:45:00	2013-12-30 18:45:00	86.3	17.5802	17.22	83.6231	19.8579	17.08	120.036	17.5367	16.9	97.3455	16.3188	16.73	86.72	17.0503	17.03	87.53	18.4143	16.83
2013-12-30	19:00:00	2013-12-30 19:00:00	90	17.6809	17.09	87.1231	19.9046	17.05	125.736	17.4605	16.91	103.945	16.6707	16.71	92.82	17.205	16.97	94.73	18.4279	16.74
2013-12-30	19:15:00	2013-12-30 19:15:00	92.6	17.7544	16.99	91.5231	19.9239	17.01	130.636	17.0747	16.92	106.245	17.0747	16.75	96.52	17.738	16.85	98.13	18.4525	16.69
2013-12-30	19:30:00	2013-12-30 19:30:00	99.6	17.8933	16.97	96.6231	20.0173	16.94	134.836	16.8224	16.92	111.445	16.7764	16.75	99.32	18.1959	16.81	103.03	18.4853	16.6
2013-12-30	19:45:00	2013-12-30 19:45:00	106.2	18.0923	16.9	100.923	20.0613	16.88	141.836	16.7574	16.85	119.545	17.0693	16.75	108.82	18.6301	16.74	112.13	18.5263	16.49
2013-12-30	20:00:00	2013-12-30 20:00:00	110.3	18.2996	16.83	108.423	20.0503	16.84	144.336	16.8089	16.72	120.745	18.4197	16.76	112.72	18.8051	16.65	115.13	18.5673	16.47
2013-12-30	20:15:00	2013-12-30 20:15:00	114.1	18.4307	16.77	112.223	20.2264	16.77	148.536	17.0096	16.66	123.645	17.0177	16.78	115.82	19.2679	16.59	120.93	18.6301	16.49
2013-12-30	20:30:00	2013-12-30 20:30:00	119.6	18.5673	16.72	118.623	20.3364	16.69	155.236	17.4197	16.64	130.145	18.6274	16.8	122.02	19.6739	16.56	124.13	18.6793	16.52
2013-12-30	20:45:00	2013-12-30 20:45:00	125.9	18.6629	16.68	122.323	20.4851	16.68	163.336	17.8279	16.64	139.045	18.5153	16.78	128.72	19.8139	16.55	130.13	18.7559	16.54
2013-12-30	21:00:00	2013-12-30 21:00:00	130.4	18.8215	16.67	128.123	20.8517	16.7	165.736	18.3924	16.63	141.945	17.8906	16.71	134.92	20.1851	16.56	134.63	18.8516	16.55
2013-12-30	21:15:00	2013-12-30 21:15:00	135.8	18.92	16.69	133.623	20.9373	16.74	171.036	18.775	16.62	146.845	18.3815	16.65	137.52	20.5623	16.57	139.83	18.9337	16.56
2013-12-30	21:30:00	2013-12-30 21:30:00	140.6	19.0925	16.73	137.923	21.1305	16.78	176.236	19.0159	16.59	150.145	19.6931	16.61	138.92	20.7635	16.58	141.83	19.0241	16.57
2013-12-30	21:45:00	2013-12-30 21:45:00	145.3	19.3501	16.77	139.823	21.4344	16.76	176.136	19.2624	16.55	153.145	19.6107	16.54	144.82	20.9869	16.58	146.33	19.1035	16.55
2013-12-30	22:00:00	2013-12-30 22:00:00	146.9	19.6053	16.74	144.923	21.6418	16.72	182.836	19.3913	16.51	156.145	18.8845	16.5	149.22	21.0808	16.59	150.23	19.2076	16.51
2013-12-30	22:15:00	2013-12-30 22:15:00	151.2	19.8139	16.68	143.523	21.7083	16.67	184.936	19.4242	16.47	160.145	18.8763	16.46	150.82	21.1139	16.58	152.13	19.2926	16.49
2013-12-30	22:30:00	2013-12-30 22:30:00	154.6	20.0366	16.6	150.423	21.8882	16.52	185.236	19.4873	16.45	160.345	18.4061	16.43	153.62	21.1415	16.56	156.23	19.383	16.47
2013-12-30	22:45:00	2013-12-30 22:45:00	156.4	20.2319	16.5	153.523	22.1819	16.47	188.736	19.5065	16.43	165.545	20.4659	16.42	155.52	21.2437	16.55	159.83	19.5037	16.46
2013-12-30	23:00:00	2013-12-30 23:00:00	156.4	20.4576	16.46	151.723	22.401	16.43	190.336	19.5504	16.41	166.645	17.0856	16.41	159.72	21.7166	16.53	158.93	19.6025	16.45
2013-12-30	23:15:00	2013-12-30 23:15:00	159.5	20.6174	16.45	155.523	22.4038	16.43	191.536	19.5696	16.4	168.845	19.5696	16.41	158.92	21.5174	16.51	162.33	19.7096	16.45
2013-12-30	23:30:00	2013-12-30 23:30:00	157.9	20.8159	16.44	152.923	22.6064	16.43	192.236	19.597	16.4	170.745	19.4763	16.41	156.82	21.8134	16.5	160.43	19.8112	16.45
2013-12-30	23:45:00	2013-12-30 23:45:00	155.5	21.009	16.44	155.323	22.7619	16.43	191.836	19.6602	16.4	171.945	20.2566	16.43	160.32	21.9048	16.49	162.53	19.9156	16.44
2013-12-31	00:00:00	2013-12-31	151.5	21.2244	16.45	151.523	23.0148	16.44	188.336	19.7508	16.43	162.445	19.5229	16.46	152.82	21.9104	16.49	158.13	20.0201	16.44
2013-12-31	00:15:00	2013-12-31 00:15:00	150.1	21.393	16.46	148.923	23.1038	16.46	184.736	19.8084	16.47	158.245	19.2926	16.48	150.72	21.9824	16.5	154.33	20.1273	16.44
2013-12-31	00:30:00	2013-12-31 00:30:00	147.2	21.534	16.47	142.923	23.0398	16.47	183.436	19.8881	16.51	153.445	19.2734	16.52	147.12	21.6225	16.49	148.33	20.2319	16.45
2013-12-31	00:45:00	2013-12-31 00:45:00	143.4	21.6834	16.47	138.123	23.0676	16.47	176.536	19.8771	16.49	150.645	19.0432	16.52	141.92	22.0212	16.49	143.73	20.3062	16.47
2013-12-31	01:00:00	2013-12-31 01:00:00	136.1	21.8301	16.49	132.323	23.0315	16.47	169.436	19.8304	16.47	146.545	19.1501	16.5	139.12	22.0544	16.49	138.63	20.3943	16.47
2013-12-31	01:15:00	2013-12-31 01:15:00	129	21.8937	16.5	128.423	22.8286	16.48	166.436	19.7892	16.46	141.645	19.2268	16.5	132.22	22.0378	16.5	137.53	20.4769	16.49
2013-12-31	01:30:00	2013-12-31 01:30:00	124.6	21.9408	16.5	121.823	22.7175	16.48	160.236	19.6739	16.47	136.245	19.2651	16.49	126.92	22.0101	16.51	130.33	20.554	16.52
2013-12-31	01:45:00	2013-12-31 01:45:00	118	21.9408	16.51	115.423	21.5644	16.49	154.036	19.6464	16.48	129.045	18.1905	16.48	121.52	21.8771	16.53	123.23	20.5761	16.55
2013-12-31	02:00:00	2013-12-31 02:00:00	112	21.4621	16.55	110.523	20.6394	16.53	148.136	19.5998	16.51	123.245	19.1144	16.48	116.92	21.7249	16.55	117.53	20.5568	16.55
2013-12-31	02:15:00	2013-12-31 02:15:00	105.1	20.9814	16.54	101.823	20.0668	16.52	141.236	18.2914	16.56	115.245	18.6493	16.5	108.72	21.451	16.57	108.73	20.5044	16.5
2013-12-31	02:30:00	2013-12-31 02:30:00	99.9	20.5017	16.52	97.1231	19.235	16.48	136.436	17.4687	16.55	110.145	18.3706	16.51	103.02	21.241	16.59	103.53	20.4273	16.4
2013-12-31	02:45:00	2013-12-31 02:45:00	93.4	19.9348	16.53	89.8231	18.3406	16.47	129.536	17.0584	16.51	102.845	17.7734	16.5	95.52	20.8876	16.6	96.43	20.3612	16.44
2013-12-31	03:00:00	2013-12-31 03:00:00	87.1	19.0816	16.58	84.1231	18.6192	16.5	123.336	16.7926	16.5	96.3455	16.855	16.48	89.52	20.3805	16.6	89.73	20.2566	16.43
2013-12-31	03:15:00	2013-12-31 03:15:00	80	18.1577	16.62	76.3231	17.5149	16.52	116.136	16.4568	16.46	89.1455	16.2485	16.47	83.12	19.4105	16.57	82.83	20.1521	16.49
2013-12-31	03:30:00	2013-12-31 03:30:00	73.9	17.1372	16.69	69.2231	15.892	16.55	110.336	16.2647	16.45	81.2455	16.7547	16.48	77.12	18.775	16.57	74.83	20.0283	16.52
2013-12-31	03:45:00	2013-12-31 03:45:00	67.6	15.9648	16.77	63.4231	14.3706	16.61	103.936	15.865	16.42	75.8455	16.1728	16.47	71.02	18.3924	16.57	69.43	19.8854	16.52
2013-12-31	04:00:00	2013-12-31 04:00:00	62.9	14.9954	16.83	58.0231	13.4256	16.67	98.8364	15.2911	16.39	70.4455	15.4984	16.42	66.12	18.1386	16.56	63.73	19.7425	16.5
2013-12-31	04:15:00	2013-12-31 04:15:00	57.2	14.0203	16.88	50.2231	12.3749	16.75	93.1364	14.7887	16.37	62.6455	16.3026	16.38	60.72	17.8742	16.56	56.23	19.5943	16.48
2013-12-31	04:30:00	2013-12-31 04:30:00	52.2	12.9631	16.93	44.6231	10.0688	16.85	88.4364	14.1299	16.37	56.9455	15.2561	16.35	55.82	17.4795	16.55	50.53	19.4845	16.46
2013-12-31	04:45:00	2013-12-31 04:45:00	48.2	11.976	16.99	39.7231	8.54153	16.93	83.9364	13.5401	16.38	51.9455	15.5172	16.34	51.32	17.0693	16.54	45.23	19.3446	16.44
2013-12-31	05:00:00	2013-12-31 05:00:00	44.1	11.0558	17.04	34.9231	7.3246	16.98	79.2364	12.7084	16.41	46.8455	15.2292	16.32	47.22	16.668	16.53	40.33	19.224	16.4
2013-12-31	05:15:00	2013-12-31 05:15:00	40.4	10.1339	17.09	30.8231	6.30144	17.04	75.5364	11.9628	16.44	42.7455	14.6546	16.34	43.22	16.3215	16.5	36.13	19.0706	16.36
2013-12-31	05:30:00	2013-12-31 05:30:00	37.5	9.15155	17.15	26.6231	5.55137	17.05	72.3364	10.7992	16.49	38.8455	12.1291	16.41	40.12	16.0161	16.47	32.23	18.9474	16.32
2013-12-31	05:45:00	2013-12-31 05:45:00	34.1	8.22886	17.19	22.7231	4.69924	17.07	68.8364	9.39443	16.54	34.7455	10.9196	16.47	36.72	15.8272	16.44	27.83	18.8243	16.27
2013-12-31	06:00:00	2013-12-31 06:00:00	31.8	7.32967	17.24	20.1231	3.93174	17.07	66.0364	8.29286	16.57	32.4455	9.98822	16.52	34.22	15.5927	16.4	25.33	18.7012	16.23
2013-12-31	06:15:00	2013-12-31 06:15:00	29.4	6.37912	17.28	16.8231	3.15251	17.09	63.5364	7.39053	16.61	28.9455	8.98907	16.59	31.32	15.3665	16.37	22.03	18.5782	16.17
2013-12-31	06:30:00	2013-12-31 06:30:00	27.1	5.47704	17.32	14.3231	2.46983	17.12	60.6364	6.60758	16.65	26.1455	7.86614	16.66	28.92	15.076	16.32	19.03	18.4552	16.12
2013-12-31	06:45:00	2013-12-31 06:45:00	25.3	4.68946	17.33	13.0231	2.02512	17.1	58.7364	5.83952	16.72	24.3455	7.43621	16.73	26.92	14.6198	16.25	17.33	18.3378	16.07
2013-12-31	07:00:00	2013-12-31 07:00:00	23	4.00412	17.33	10.0231	1.73891	17.06	56.8364	5.18301	16.79	21.7455	6.47193	16.73	24.82	13.7134	16.22	14.53	18.2259	16.03
2013-12-31	07:15:00	2013-12-31 07:15:00	21.9	3.39004	17.35	8.62308	1.54345	16.91	54.7364	4.59416	16.85	20.2455	6.04891	16.72	23.12	12.2876	16.24	12.73	18.1168	15.99
2013-12-31	07:30:00	2013-12-31 07:30:00	20.6	2.93289	17.33	7.62308	1.58374	16.9	53.7364	4.13709	16.9	19.1455	5.73754	16.72	21.62	11.3102	16.26	11.33	18.0023	15.93
2013-12-31	07:45:00	2013-12-31 07:45:00	19.6	2.55586	17.31	6.62308	1.59046	16.87	52.0364	3.74165	16.93	18.4455	5.29651	16.73	19.72	10.5535	16.3	11.43	17.7625	15.85
2013-12-31	08:00:00	2013-12-31 08:00:00	18.9	2.25696	17.21	6.82308	1.59943	16.71	50.9364	3.35909	16.96	19.3455	5.1091	16.73	18.82	9.45911	16.34	11.73	17.4116	15.91
2013-12-31	08:15:00	2013-12-31 08:15:00	19.4	2.01598	17.11	9.42308	1.14999	16.59	50.9364	3.02011	16.98	21.2455	4.14919	16.85	18.22	8.1061	16.39	14.33	17.0992	16
2013-12-31	08:30:00	2013-12-31 08:30:00	20.3	1.79994	17.05	14.0231	1.13035	16.6	51.5364	2.74268	17.03	27.7455	3.61935	16.97	18.42	6.98807	16.44	20.73	16.7953	16.05
2013-12-31	08:45:00	2013-12-31 08:45:00	24.1	1.6241	17.05	21.0231	1.14344	16.59	54.9364	2.4327	17.09	33.3455	2.94702	17.11	20.32	6.24636	16.47	26.93	16.4351	16.09
2013-12-31	09:00:00	2013-12-31 09:00:00	28.6	1.48096	17.19	27.5231	1.17184	16.58	59.1364	2.25004	17.15	40.9455	2.79424	17.2	24.32	5.67543	16.54	33.73	16.1107	16.06
2013-12-31	09:15:00	2013-12-31 09:15:00	36.4	1.34998	17.31	35.3231	1.65331	16.54	64.8364	2.09148	17.21	48.8455	3.55474	17.06	31.02	5.61337	16.54	42.33	15.9918	16.26
2013-12-31	09:30:00	2013-12-31 09:30:00	41.1	1.23538	17.31	41.4231	1.10857	16.87	70.6364	2.3262	17.21	55.0455	7.83045	16.83	37.32	8.73164	16.46	48.63	15.8056	16.31
2013-12-31	09:45:00	2013-12-31 09:45:00	47.4	1.23977	16.73	47.8231	0.998018	16.93	77.9364	5.40032	17	62.8455	11.6335	16.7	44.72	11.5914	16.41	55.73	15.6412	16.31
2013-12-31	10:00:00	2013-12-31 10:00:00	54.3	1.22441	16.56	54.2231	17.6618	16.8	86.3364	7.87634	16.89	68.9455	13.4496	16.64	55.52	12.629	16.37	62.23	15.6492	16.47
2013-12-31	10:15:00	2013-12-31 10:15:00	63.1	1.36325	16.57	62.9231	19.4269	16.68	95.8364	9.68188	16.77	76.9455	14.9417	16.63	63.02	12.7058	16.35	69.73	15.6735	16.55
2013-12-31	10:30:00	2013-12-31 10:30:00	71.9	2.62113	16.58	71.1231	20.0861	16.64	105.036	10.807	16.72	85.8455	16.7113	16.63	72.92	16.3026	16.49	77.23	15.7247	16.57
2013-12-31	10:45:00	2013-12-31 10:45:00	79.6	5.25208	16.6	78.5231	20.4218	16.65	113.236	11.3549	16.71	93.0455	17.0422	16.64	80.22	17.0639	16.57	85.63	15.838	16.53
2013-12-31	11:00:00	2013-12-31 11:00:00	88.2	7.66492	16.53	86.9231	19.9816	16.63	120.936	11.8732	16.71	99.7455	17.4442	16.62	90.32	16.6815	16.58	93.43	16.0026	16.5
2013-12-31	11:15:00	2013-12-31 11:15:00	93.3	9.42806	16.51	90.8231	19.4571	16.6	127.136	12.6819	16.73	105.045	17.1263	16.6	96.22	16.1647	16.58	98.33	16.1836	16.48
2013-12-31	11:30:00	2013-12-31 11:30:00	99.7	11.0008	16.5	97.1231	19.1857	16.57	134.236	13.072	16.73	110.545	17.1507	16.59	101.22	15.9837	16.54	103.53	16.3945	16.46
2013-12-31	11:45:00	2013-12-31 11:45:00	102	12.3563	16.5	101.623	19.2103	16.56	139.236	13.6547	16.74	115.845	17.3789	16.56	107.32	16.0215	16.51	107.43	16.5921	16.46
2013-12-31	12:00:00	2013-12-31 12:00:00	107.4	13.5082	16.51	106.623	19.3611	16.56	143.036	14.285	16.75	119.745	17.2404	16.49	110.52	16.6301	16.49	112.43	16.7845	16.45
2013-12-31	12:15:00	2013-12-31 12:15:00	110.1	14.4403	16.54	109.023	19.4873	16.56	145.036	14.7673	16.76	121.245	16.9092	16.44	112.32	17.4795	16.44	115.73	16.9635	16.45
2013-12-31	12:30:00	2013-12-31 12:30:00	116.7	15.2696	16.55	115.123	19.5613	16.57	150.236	14.9256	16.6	125.245	16.5651	16.38	116.52	17.8851	16.39	120.63	17.1344	16.45
2013-12-31	12:45:00	2013-12-31 12:45:00	115.8	15.9513	16.56	113.223	19.6849	16.58	150.936	15.0465	16.45	126.345	16.8116	16.37	117.42	18.2041	16.38	120.93	17.3001	16.46
2013-12-31	13:00:00	2013-12-31 13:00:00	120.2	16.5353	16.58	116.823	20.0833	16.61	152.336	15.283	16.42	129.845	16.7005	16.34	120.02	18.7203	16.39	123.53	17.436	16.48
2013-12-31	13:15:00	2013-12-31 13:15:00	118.7	17.0232	16.59	116.523	20.386	16.62	153.036	15.0062	16.33	129.145	16.584	16.33	120.22	18.8215	16.39	120.23	17.5802	16.48
2013-12-31	13:30:00	2013-12-31 13:30:00	116	17.4551	16.6	115.123	20.3585	16.63	155.436	15.1755	16.37	127.745	16.4784	16.33	120.12	18.9611	16.4	122.73	17.7244	16.45
2013-12-31	13:45:00	2013-12-31 13:45:00	122	17.8143	16.61	121.623	20.3117	16.64	155.436	15.388	16.47	132.545	16.6246	16.34	120.52	19.0487	16.39	126.83	17.8333	16.43
2013-12-31	14:00:00	2013-12-31 14:00:00	117.1	18.1059	16.61	116.823	20.2071	16.63	152.036	15.4526	16.56	127.145	16.8143	16.32	117.82	19.0104	16.38	118.83	17.9587	16.41
2013-12-31	14:15:00	2013-12-31 14:15:00	116.8	18.3214	16.61	113.623	20.3832	16.64	151.336	15.6088	16.48	127.345	16.7167	16.29	118.22	19.035	16.39	121.03	18.0486	16.39
2013-12-31	14:30:00	2013-12-31 14:30:00	112.5	18.4853	16.63	110.023	20.4135	16.65	148.936	15.8974	16.46	123.245	16.6301	16.28	115.62	19.0898	16.41	117.93	18.1386	16.38
2013-12-31	14:45:00	2013-12-31 14:45:00	108	18.6465	16.64	107.623	20.5457	16.66	144.536	15.981	16.47	121.545	16.5596	16.3	112.52	19.1254	16.43	116.53	18.2205	16.38
2013-12-31	15:00:00	2013-12-31 15:00:00	103.9	18.7915	16.66	102.223	20.5209	16.66	140.136	16.1215	16.49	115.845	16.6355	16.3	105.22	19.2542	16.45	107.63	18.3023	16.34
2013-12-31	15:15:00	2013-12-31 15:15:00	99.4	18.8681	16.68	97.8231	20.5678	16.66	135.036	16.208	16.52	110.845	16.5272	16.33	103.12	19.2898	16.45	104.83	18.3542	16.31
2013-12-31	15:30:00	2013-12-31 15:30:00	94.9	18.9529	16.7	94.1231	20.5733	16.65	133.336	16.2701	16.53	108.445	16.9038	16.36	101.62	19.3172	16.45	101.13	18.4279	16.34
2013-12-31	15:45:00	2013-12-31 15:45:00	91.8	18.8298	16.77	89.2231	20.5347	16.65	127.536	16.3215	16.49	104.245	16.5732	16.37	94.12	19.1994	16.46	96.23	18.488	16.39
2013-12-31	16:00:00	2013-12-31 16:00:00	88.1	18.2287	16.86	83.9231	20.5072	16.65	123.136	16.3404	16.48	97.7455	16.7059	16.36	89.92	19.1692	16.46	90.23	18.5263	16.38
2013-12-31	16:15:00	2013-12-31 16:15:00	83.9	17.6537	16.9	81.4231	20.4824	16.73	118.736	16.3648	16.52	94.1455	16.7601	16.36	85.72	19.0597	16.48	87.43	18.5755	16.34
2013-12-31	16:30:00	2013-12-31 16:30:00	77.3	17.1915	16.92	74.0231	20.4824	16.75	113.136	12.277	16.81	86.5455	16.6463	16.36	79.42	18.652	16.55	78.53	18.6055	16.33
2013-12-31	16:45:00	2013-12-31 16:45:00	72.1	16.7926	16.94	69.8231	20.2181	16.83	108.336	11.0217	16.99	82.3455	16.427	16.44	74.82	17.3463	16.69	75.43	18.5399	16.56
2013-12-31	17:00:00	2013-12-31 17:00:00	67.1	16.1917	17	63.3231	19.0953	16.86	103.436	10.5092	17.02	76.3455	16.2188	16.52	69.92	16.0945	16.8	69.43	18.4115	16.77
2013-12-31	17:15:00	2013-12-31 17:15:00	64.2	15.1593	17.11	61.0231	16.6409	16.93	99.9364	10.1052	17	74.9455	15.4957	16.59	67.62	15.2373	16.84	68.03	18.2696	16.83
2013-12-31	17:30:00	2013-12-31 17:30:00	60.9	13.9642	17.19	58.4231	13.6014	17	97.5364	9.71819	16.94	72.1455	13.9723	16.71	63.82	14.3974	16.85	64.43	18.1441	16.82
2013-12-31	17:45:00	2013-12-31 17:45:00	60.1	12.8782	17.25	57.8231	12.0182	17.02	94.9364	9.2006	16.89	70.6455	12.3775	16.79	62.22	13.5295	16.82	63.63	17.9778	16.8
2013-12-31	18:00:00	2013-12-31 18:00:00	60.4	11.9022	17.28	57.1231	15.6277	17.03	95.8364	8.9092	16.85	71.1455	11.8996	16.78	62.42	12.7721	16.8	64.03	17.9205	16.7
2013-12-31	18:15:00	2013-12-31 18:15:00	59	10.9562	17.3	56.4231	18.0759	16.97	93.6364	8.73421	16.83	68.8455	11.9207	16.69	61.12	12.2876	16.79	62.53	17.7925	16.65
2013-12-31	18:30:00	2013-12-31 18:30:00	57.7	10.1469	17.28	55.4231	18.2068	16.87	92.1364	9.36857	16.87	66.9455	13.8761	16.62	59.22	11.8864	16.77	60.33	17.6918	16.63
2013-12-31	18:45:00	2013-12-31 18:45:00	56.1	9.441	17.23	51.5231	18.4744	16.84	90.5364	8.88087	16.84	65.2455	15.0277	16.61	58.22	11.5572	16.76	58.13	17.6455	16.6
2013-12-31	19:00:00	2013-12-31 19:00:00	56.3	8.6905	17.2	53.7231	18.2641	16.85	91.1364	7.47429	16.83	67.8455	16.054	16.6	58.82	11.3864	16.74	61.03	17.5992	16.59
2013-12-31	19:15:00	2013-12-31 19:15:00	57	7.92735	17.18	55.4231	18.9146	16.82	90.5364	6.62266	16.89	68.0455	16.2512	16.62	58.22	11.3575	16.71	60.73	17.6074	16.59
2013-12-31	19:30:00	2013-12-31 19:30:00	59.4	7.62422	17.14	58.0231	19.5504	16.81	93.1364	6.13383	16.93	73.2455	16.668	16.63	61.12	11.5546	16.67	65.43	17.6346	16.57
2013-12-31	19:45:00	2013-12-31 19:45:00	64.6	8.5364	17.01	62.2231	20.1686	16.77	98.1364	12.211	16.79	76.2455	17.4741	16.6	66.32	16.0891	16.61	68.83	17.7462	16.57
2013-12-31	20:00:00	2013-12-31 20:00:00	69.4	10.1521	16.91	68.1231	20.2153	16.78	102.836	14.1994	16.67	80.8455	17.5802	16.54	71.62	18.0186	16.55	74.83	17.866	16.45
2013-12-31	20:15:00	2013-12-31 20:15:00	74.2	11.7151	16.85	73.0231	20.4548	16.76	108.336	14.9524	16.63	87.3455	18.1959	16.47	76.02	20.3309	16.42	79.63	18.0296	16.34
2013-12-31	20:30:00	2013-12-31 20:30:00	79.3	13.0906	16.81	77.3231	21.2769	16.5	113.136	15.8056	16.58	90.0455	18.458	16.41	81.02	20.8738	16.31	83.23	18.2205	16.3
2013-12-31	20:45:00	2013-12-31 20:45:00	86.6	14.5206	16.42	85.0231	22.5286	16.24	120.036	16.3864	16.53	98.4455	19.2021	16.35	87.82	20.8959	16.24	91.43	18.4279	16.28
2013-12-31	21:00:00	2013-12-31 21:00:00	91.6	15.8866	16.27	88.8231	22.5148	16.22	124.936	16.7682	16.51	102.145	19.792	16.33	93.22	21.7276	16.25	95.23	18.6684	16.27
2013-12-31	21:15:00	2013-12-31 21:15:00	96.5	17.0069	16.23	94.5231	22.6841	16.21	131.136	17.0557	16.53	107.745	20.1906	16.31	99.92	22.8925	16.27	100.43	18.9255	16.27
2013-12-31	21:30:00	2013-12-31 21:30:00	101	17.9042	16.21	100.623	23.4016	16.2	136.436	17.3735	16.53	112.745	20.4383	16.3	103.82	23.5798	16.28	106.53	19.2021	16.27
2013-12-31	21:45:00	2013-12-31 21:45:00	107.6	18.6356	16.18	106.223	23.9757	16.21	142.336	17.8906	16.47	119.945	20.6036	16.29	110.02	23.9227	16.28	111.93	19.49	16.28
2013-12-31	22:00:00	2013-12-31 22:00:00	115.1	19.2542	16.18	114.323	24.0984	16.22	150.036	18.6165	16.39	126.945	20.7552	16.29	117.42	24.3413	16.29	119.53	19.7837	16.29
2013-12-31	22:15:00	2013-12-31 22:15:00	122	19.8139	16.19	120.623	24.1291	16.23	157.436	18.734	16.35	134.945	20.8104	16.3	125.52	24.4838	16.3	127.73	20.0778	16.3
2013-12-31	22:30:00	2013-12-31 22:30:00	129.5	20.2952	16.2	128.023	24.4643	16.24	164.936	18.7368	16.31	141.445	20.8931	16.3	131.22	24.1738	16.3	135.03	20.364	16.31
2013-12-31	22:45:00	2013-12-31 22:45:00	133.8	20.678	16.22	130.023	24.5397	16.25	167.936	17.6863	16.2	143.445	20.9428	16.3	136.42	23.8781	16.3	137.03	20.6119	16.31
2013-12-31	23:00:00	2013-12-31 23:00:00	135.8	21.1112	16.24	135.723	24.5146	16.26	171.036	18.4853	16.25	148.645	20.9069	16.3	138.22	23.9143	16.31	140.83	20.8738	16.31
2013-12-31	23:15:00	2013-12-31 23:15:00	138.6	21.4814	16.25	136.923	24.5621	16.27	174.236	18.6137	16.27	151.045	20.6477	16.29	141.72	23.9227	16.31	143.93	21.1305	16.31
2013-12-31	23:30:00	2013-12-31 23:30:00	143.3	21.7885	16.26	141.323	24.6208	16.27	177.236	18.7203	16.28	152.845	20.3805	16.29	143.32	23.9785	16.31	145.93	21.3708	16.31
2013-12-31	23:45:00	2013-12-31 23:45:00	145.6	22.0849	16.27	142.323	24.6711	16.27	180.336	19.2624	16.31	156.145	20.1246	16.28	146.52	23.9283	16.32	149.23	21.5948	16.32
2014-01-01	00:00:00	2014-01-01	145.2	22.3455	16.28	142.823	24.6823	16.28	181.436	19.5257	16.3	158.045	20.1191	16.28	148.02	23.8028	16.31	149.33	21.8024	16.32
2014-01-01	00:15:00	2014-01-01 00:15:00	146	22.5342	16.28	145.223	24.7047	16.28	181.036	19.8084	16.29	157.145	20.0036	16.28	148.82	23.6495	16.3	152.23	21.999	16.32
2014-01-01	00:30:00	2014-01-01 00:30:00	146.1	22.7063	16.29	144.423	24.7382	16.28	182.436	20.0861	16.3	157.145	20.2429	16.29	149.02	23.2679	16.29	149.23	22.1708	16.32
2014-01-01	00:45:00	2014-01-01 00:45:00	143.8	22.8425	16.3	141.423	24.495	16.28	179.236	20.2869	16.31	154.945	20.1933	16.28	144.42	23.0955	16.28	146.93	22.3095	16.29
2014-01-01	01:00:00	2014-01-01 01:00:00	141	22.9926	16.31	138.723	24.509	16.28	177.636	20.4493	16.31	152.245	20.0916	16.27	142.72	23.0371	16.28	147.53	22.4149	16.27
2014-01-01	01:15:00	2014-01-01 01:15:00	137.9	23.0426	16.31	136.823	24.6515	16.29	175.136	20.6229	16.32	149.845	20.0228	16.28	142.22	22.8425	16.26	143.43	22.5286	16.27
2014-01-01	01:30:00	2014-01-01 01:30:00	133.9	23.1177	16.32	133.123	24.4754	16.28	169.336	20.7497	16.32	142.945	20.3695	16.31	135.92	22.7286	16.27	138.43	22.648	16.29
2014-01-01	01:45:00	2014-01-01 01:45:00	130	23.1706	16.32	128.123	24.0315	16.28	165.036	20.8242	16.32	141.145	20.1576	16.29	131.22	22.7869	16.28	133.83	22.7286	16.29
2014-01-01	02:00:00	2014-01-01 02:00:00	125.2	23.2206	16.33	123.123	23.9701	16.3	159.936	20.8186	16.32	136.145	20.2429	16.3	128.02	22.7702	16.29	129.03	22.7925	16.29
2014-01-01	02:15:00	2014-01-01 02:15:00	117.4	23.2039	16.33	114.623	24.1961	16.31	152.936	20.4438	16.25	127.345	20.4962	16.32	119.02	22.9453	16.3	120.93	22.8647	16.3
2014-01-01	02:30:00	2014-01-01 02:30:00	111.5	23.1539	16.33	108.823	23.1233	16.12	147.236	18.652	16.13	121.445	20.4631	16.32	115.22	23.2123	16.32	114.43	22.8008	16.11
2014-01-01	02:45:00	2014-01-01 02:45:00	103.5	23.0676	16.3	100.223	20.5209	15.91	139.736	16.5082	15.78	114.145	20.5678	16.32	107.52	23.3626	16.31	107.53	22.6841	15.66
2014-01-01	03:00:00	2014-01-01 03:00:00	97.8	22.4482	16.08	95.6231	20.9428	15.99	133.336	15.4122	15.64	107.945	20.6477	16.31	99.32	23.4628	16.29	100.33	22.5925	15.73
2014-01-01	03:15:00	2014-01-01 03:15:00	89.9	21.4178	15.98	86.4231	20.5926	15.98	127.136	16.4866	15.84	99.1455	20.6036	16.29	93.42	22.3788	16.16	92.33	22.4759	15.75
2014-01-01	03:30:00	2014-01-01 03:30:00	83.2	19.9816	15.97	78.8231	19.6602	15.94	119.636	16.8929	15.93	91.4455	20.4659	16.25	86.72	21.7608	16.13	84.93	22.4343	15.96
2014-01-01	03:45:00	2014-01-01 03:45:00	76.2	18.6383	16.07	72.0231	17.4415	15.95	114.036	16.6734	15.96	85.6455	19.8826	16.19	79.42	20.9152	16.09	78.13	22.3011	16.02
2014-01-01	04:00:00	2014-01-01 04:00:00	69.9	17.2702	16.16	65.0231	16.3296	15.99	105.936	16.4405	15.97	78.4455	19.246	16.12	72.62	20.1686	16.07	71.43	22.1348	16.01
2014-01-01	04:15:00	2014-01-01 04:15:00	63.5	15.9217	16.22	57.6231	15.2481	16.05	99.3364	16.3513	15.98	70.0455	18.6329	16.08	66.62	19.0542	16.09	63.23	21.9381	16
2014-01-01	04:30:00	2014-01-01 04:30:00	57.9	14.7485	16.28	52.0231	13.8521	16.12	94.4364	16.308	15.95	64.5455	18.1086	16.03	62.12	18.4471	16.1	57.63	21.7553	16
2014-01-01	04:45:00	2014-01-01 04:45:00	52.5	13.5934	16.36	45.6231	10.8986	16.19	89.3364	16.2458	15.89	57.4455	17.7952	15.98	56.92	18.1304	16.08	50.83	21.6004	15.98
2014-01-01	05:00:00	2014-01-01 05:00:00	47.5	12.4886	16.44	38.7231	8.89632	16.34	83.9364	15.6223	15.82	51.5455	17.572	15.92	51.72	17.5557	16.06	45.03	21.4178	15.96
2014-01-01	05:15:00	2014-01-01 05:15:00	43.2	11.4232	16.53	34.5231	7.7642	16.41	79.2364	14.7109	15.81	46.6455	17.2404	15.78	47.52	16.4757	16.04	39.13	21.2548	15.92
2014-01-01	05:30:00	2014-01-01 05:30:00	39.7	10.2198	16.64	30.3231	6.40921	16.52	76.1364	14.1673	15.8	42.2455	16.2161	15.73	42.62	15.4499	16.01	35.43	21.067	15.87
2014-01-01	05:45:00	2014-01-01 05:45:00	36.2	8.99422	16.77	25.8231	5.13619	16.63	71.5364	13.1464	15.82	37.5455	14.4804	15.83	39.92	14.6975	15.98	31.33	20.8297	15.81
2014-01-01	06:00:00	2014-01-01 06:00:00	33	7.80751	16.88	21.9231	4.04276	16.71	68.1364	11.1685	15.98	34.0455	13.1942	15.95	36.72	14.2823	15.95	27.53	20.5981	15.79
2014-01-01	06:15:00	2014-01-01 06:15:00	30.3	6.59501	17	18.2231	3.14067	16.8	65.0364	9.45135	16.1	30.4455	12.1846	16.03	31.12	14.0898	15.91	23.03	20.3805	15.77
2014-01-01	06:30:00	2014-01-01 06:30:00	27.6	5.46961	17.12	15.5231	2.32158	16.89	62.0364	8.10866	16.18	27.6455	11.0243	16.11	29.52	13.9883	15.88	20.43	20.1411	15.71
2014-01-01	06:45:00	2014-01-01 06:45:00	25.5	4.54536	17.18	12.3231	1.70959	16.94	59.5364	6.92748	16.25	24.1455	9.34788	16.24	26.82	13.9776	15.85	17.03	19.9046	15.59
2014-01-01	07:00:00	2014-01-01 07:00:00	23.3	3.77768	17.2	9.42308	1.27936	16.93	57.1364	5.71517	16.33	21.5455	8.45173	16.28	24.72	14.1326	15.81	13.93	19.6821	15.44
2014-01-01	07:15:00	2014-01-01 07:15:00	21.9	3.18568	17.2	7.62308	1.0651	16.84	54.9364	4.83392	16.41	19.8455	7.6522	16.24	24.12	13.7427	15.64	11.73	19.4735	15.31
2014-01-01	07:30:00	2014-01-01 07:30:00	20.7	2.71693	17.2	6.42308	1.11075	16.83	53.8364	4.12014	16.48	18.5455	7.01585	16.27	22.42	13.0666	15.55	10.43	19.235	15.22
2014-01-01	07:45:00	2014-01-01 07:45:00	19.6	2.33776	17.18	5.12308	1.32788	16.81	52.4364	3.55713	16.53	16.9455	6.48448	16.33	19.92	12.5442	15.51	9.03	19.0432	15.21
2014-01-01	08:00:00	2014-01-01 08:00:00	18.3	2.03655	17.14	3.22308	1.27496	16.69	50.6364	3.12883	16.57	14.7455	5.8943	16.19	18.42	10.9379	15.54	6.63	18.8188	15.22
2014-01-01	08:15:00	2014-01-01 08:15:00	17.3	1.79315	17.03	2.12308	0.0110345	16.13	49.5364	2.83179	16.6	13.4455	5.30639	16.2	17.42	9.43323	15.58	5.33	18.6137	15.25
2014-01-01	08:30:00	2014-01-01 08:30:00	16.4	1.6084	16.82	2.72308	0.00954268	15.48	48.1364	2.59314	16.64	12.3455	4.58196	16.35	16.02	8.18537	15.62	4.03	18.3624	15.17
2014-01-01	08:45:00	2014-01-01 08:45:00	15.3	1.50772	16.56	2.72308	0.00806948	14.83	47.0364	2.38403	16.69	11.4455	3.98963	16.45	14.62	6.97292	15.7	3.33	5.14604	14.96
2014-01-01	09:00:00	2014-01-01 09:00:00	14.7	1.46537	16.03	2.62308	0.00806948	14.49	45.9364	2.1672	16.75	11.7455	3.51171	16.63	12.72	6.09885	15.76	3.33	9.73116	14.9
2014-01-01	09:15:00	2014-01-01 09:15:00	15	1.42534	15.78	3.72308	1.04559	15.42	45.9364	1.96806	16.81	16.7455	3.22837	16.77	13.42	5.33357	15.83	8.63	14.7941	15.03
2014-01-01	09:30:00	2014-01-01 09:30:00	15.9	1.39205	15.76	8.92308	1.08899	15.79	46.4364	1.77506	16.88	20.4455	2.84588	16.91	13.12	4.78981	15.92	13.93	12.8039	15.21
2014-01-01	09:45:00	2014-01-01 09:45:00	18.5	1.34335	15.85	15.3231	1.29478	15.78	49.2364	1.60391	16.96	27.2455	2.44661	17.01	14.82	4.4357	16.01	20.93	12.5574	15.31
2014-01-01	10:00:00	2014-01-01 10:00:00	22.8	1.28156	16.34	20.8231	1.18934	15.78	53.3364	1.50325	17.04	33.1455	2.24543	17.08	17.62	4.31897	16.01	26.93	13.8521	15.83
2014-01-01	10:15:00	2014-01-01 10:15:00	28.2	1.20467	16.82	27.5231	1.14999	15.8	57.8364	1.3854	17.12	40.3455	8.7805	16.74	22.92	4.05243	16.21	34.23	16.7953	16.3
2014-01-01	10:30:00	2014-01-01 10:30:00	35.3	1.10422	17.05	36.5231	1.01746	16.32	63.5364	2.39561	17.04	50.3455	13.3831	16.57	29.32	14.4215	16.15	43.93	18.4798	16.29
2014-01-01	10:45:00	2014-01-01 10:45:00	43.7	1.08682	16.79	46.7231	1.01746	16.61	71.2364	9.10253	16.73	60.9455	15.6735	16.5	36.72	18.5427	16.11	54.23	19.5257	16.31
2014-01-01	11:00:00	2014-01-01 11:00:00	52.7	1.11728	16.26	54.7231	17.7734	16.38	81.2364	11.1134	16.65	68.8455	16.6246	16.46	47.92	17.1589	16.14	61.53	19.9953	16.29
2014-01-01	11:15:00	2014-01-01 11:15:00	63.8	1.5524	16.24	64.6231	17.1372	16.04	92.9364	11.5152	16.63	79.1455	17.1969	16.37	60.92	15.9756	16.2	71.43	20.408	16.3
2014-01-01	11:30:00	2014-01-01 11:30:00	73.9	2.7029	16.11	73.5231	16.9906	15.98	104.336	11.6651	16.61	88.0455	16.5109	16.2	73.02	14.8075	16.23	80.73	20.4245	16.13
2014-01-01	11:45:00	2014-01-01 11:45:00	81.6	4.3457	15.91	80.7231	15.6816	15.88	114.536	10.7521	16.61	94.7455	16.2458	16.16	82.72	14.1326	16.29	87.43	20.2814	16.01
2014-01-01	12:00:00	2014-01-01 12:00:00	90.6	5.79722	15.8	89.2231	15.4526	15.87	123.836	9.79083	16.58	103.945	15.6277	16.1	92.82	14.3144	16.18	96.23	19.9678	15.94
2014-01-01	12:15:00	2014-01-01 12:15:00	99.2	7.06892	15.81	97.6231	15.7921	15.88	133.736	9.72078	16.5	111.745	14.5394	15.98	101.82	14.719	16.04	104.93	19.5888	15.86
2014-01-01	12:30:00	2014-01-01 12:30:00	105.5	8.45686	15.86	104.323	16.3973	15.9	139.936	10.1807	16.39	118.445	15.119	15.97	107.92	15.0733	15.87	112.13	19.3117	15.82
2014-01-01	12:45:00	2014-01-01 12:45:00	114.6	10.0376	15.9	112.723	17.091	15.87	147.936	11.5914	15.85	124.745	16.262	15.94	114.42	16.1242	15.73	117.23	19.2651	15.77
2014-01-01	13:00:00	2014-01-01 13:00:00	118.7	11.3811	15.85	116.823	17.053	15.8	154.536	13.9082	15.81	130.445	16.6084	15.88	121.12	17.4768	15.72	123.53	19.2268	15.63
2014-01-01	13:15:00	2014-01-01 13:15:00	122.8	12.4066	15.81	120.723	16.9797	15.78	158.036	14.9068	15.81	134.145	16.714	15.86	126.42	18.3105	15.68	127.53	19.2049	15.56
2014-01-01	13:30:00	2014-01-01 13:30:00	126.2	13.1915	15.79	124.123	16.9309	15.76	161.136	15.0626	15.75	137.945	16.7791	15.85	128.22	18.6793	15.63	129.83	19.1775	15.53
2014-01-01	13:45:00	2014-01-01 13:45:00	127.9	13.7961	15.78	125.923	16.9011	15.75	162.936	15.4095	15.7	138.345	16.8333	15.83	129.52	18.8489	15.61	131.93	19.2898	15.55
2014-01-01	14:00:00	2014-01-01 14:00:00	128.2	14.2476	15.76	126.623	16.8713	15.73	163.136	15.5442	15.69	139.945	16.8468	15.8	130.32	19.0213	15.59	133.53	19.4324	15.56
2014-01-01	14:15:00	2014-01-01 14:15:00	127.7	14.5528	15.74	125.723	16.8279	15.67	162.936	15.2185	15.72	139.245	16.8577	15.78	130.82	19.2021	15.59	131.93	19.5751	15.57
2014-01-01	14:30:00	2014-01-01 14:30:00	126.5	14.8639	15.76	124.123	17.2023	15.54	159.436	15.5711	15.72	136.445	16.8794	15.77	126.82	19.3446	15.59	129.73	19.6547	15.58
2014-01-01	14:45:00	2014-01-01 14:45:00	120.5	15.1163	15.8	119.623	17.6537	15.82	155.136	15.7166	15.71	130.645	16.8984	15.77	124.52	19.4105	15.6	125.13	19.7288	15.58
2014-01-01	15:00:00	2014-01-01 15:00:00	116.4	15.458	15.83	114.423	18.3733	15.85	151.036	15.7787	15.72	126.745	16.9228	15.78	116.92	19.512	15.6	118.73	19.8497	15.6
2014-01-01	15:15:00	2014-01-01 15:15:00	112.5	15.7382	15.84	110.023	18.4962	15.84	148.236	15.811	15.74	123.845	16.9092	15.79	115.12	19.5476	15.61	115.83	19.9458	15.6
2014-01-01	15:30:00	2014-01-01 15:30:00	108.7	15.9972	15.85	106.023	18.5208	15.85	144.336	15.8407	15.76	118.745	16.9201	15.79	110.92	19.5915	15.62	113.63	20.0201	15.61
2014-01-01	15:45:00	2014-01-01 15:45:00	105.8	16.1971	15.86	103.823	18.6766	15.86	140.336	15.8272	15.8	115.845	16.9472	15.79	107.72	19.6053	15.64	109.43	20.0861	15.62
2014-01-01	16:00:00	2014-01-01 16:00:00	101.3	16.3486	15.87	97.8231	18.7368	15.87	136.036	15.8191	15.83	112.245	16.9689	15.81	104.22	19.586	15.68	104.93	20.1383	15.63
2014-01-01	16:15:00	2014-01-01 16:15:00	96.5	16.4324	15.87	94.4231	18.611	15.86	132.836	13.8575	15.92	108.245	16.9743	15.81	99.92	19.5668	15.7	102.03	20.1686	15.63
2014-01-01	16:30:00	2014-01-01 16:30:00	91.8	16.4947	15.89	90.3231	18.6028	15.87	127.536	12.3458	16.04	102.145	16.9906	15.81	94.12	19.2789	15.77	94.53	20.1878	15.63
2014-01-01	16:45:00	2014-01-01 16:45:00	88.1	16.5109	15.91	85.7231	18.5153	15.88	124.436	11.9892	16.07	99.5455	16.9933	15.79	91.12	18.4716	15.86	92.53	20.2236	15.63
2014-01-01	17:00:00	2014-01-01 17:00:00	84.8	16.4324	15.93	82.9231	18.5235	15.89	120.036	11.4389	16.12	95.4455	17.0883	15.77	86.72	17.4551	15.97	88.33	20.2511	15.62
2014-01-01	17:15:00	2014-01-01 17:15:00	79.6	16.1242	15.96	77.5231	17.8197	15.92	116.136	10.9091	16.2	90.8455	17.0937	15.75	82.52	16.3945	16.07	83.73	20.2704	15.63
2014-01-01	17:30:00	2014-01-01 17:30:00	74.8	15.5576	16.02	72.1231	16.0242	15.95	111.236	10.3318	16.26	85.3455	17.1399	15.76	78.32	15.563	16.14	79.43	20.2649	15.63
2014-01-01	17:45:00	2014-01-01 17:45:00	71.6	14.8961	16.08	68.1231	17.4578	16.05	107.336	9.86611	16.31	80.4455	17.1236	15.79	74.52	15.1244	16.18	74.73	18.6274	16.15
2014-01-01	18:00:00	2014-01-01 18:00:00	66.7	14.2074	16.2	63.9231	14.8263	16.12	103.036	9.441	16.34	76.5455	16.9743	15.83	69.72	14.6948	16.21	70.13	17.5258	16.22
2014-01-01	18:15:00	2014-01-01 18:15:00	63.6	13.0427	16.4	60.2231	11.602	16.17	98.9364	8.9195	16.36	73.8455	16.4378	15.89	65.92	14.2743	16.23	66.83	16.6842	16.22
2014-01-01	18:30:00	2014-01-01 18:30:00	59.9	11.9787	16.52	57.3231	11.5599	16.23	96.1364	8.49277	16.37	70.4455	15.8839	15.97	63.42	13.7881	16.25	63.93	15.9648	16.21
2014-01-01	18:45:00	2014-01-01 18:45:00	56.8	10.9929	16.61	53.4231	15.8137	16.15	92.9364	8.15723	16.37	66.9455	15.0491	16	60.02	13.0613	16.28	60.13	15.423	16.17
2014-01-01	19:00:00	2014-01-01 19:00:00	56.3	10.0584	16.71	52.8231	17.6047	16.02	90.9364	7.86104	16.37	66.1455	14.5233	16.03	58.62	12.1687	16.3	59.83	15.7706	16.04
2014-01-01	19:15:00	2014-01-01 19:15:00	53.2	9.43582	16.71	50.2231	15.2857	16.08	87.8364	7.56066	16.37	62.8455	14.3519	16	55.52	11.2761	16.32	57.03	16.8333	15.88
2014-01-01	19:30:00	2014-01-01 19:30:00	54.5	9.15672	16.66	52.8231	14.5367	16.08	88.7364	7.26378	16.37	65.0455	14.9363	15.83	55.52	10.397	16.34	58.13	17.6346	15.77
2014-01-01	19:45:00	2014-01-01 19:45:00	52.2	9.46429	16.51	50.7231	14.6064	16.05	87.3364	7.19034	16.35	64.7455	15.4499	15.71	54.42	9.67151	16.35	57.73	18.2478	15.7
2014-01-01	20:00:00	2014-01-01 20:00:00	55.1	9.33237	16.66	52.5231	17.034	15.96	90.0364	7.36517	16.35	66.7455	16.0702	15.64	57.12	9.14381	16.34	58.73	18.838	15.62
2014-01-01	20:15:00	2014-01-01 20:15:00	59.7	9.77007	16.53	57.6231	17.6428	15.98	92.9364	7.54033	16.35	70.6455	16.9092	15.58	59.62	8.9968	16.33	63.53	19.3309	15.52
2014-01-01	20:30:00	2014-01-01 20:30:00	63.6	10.8175	16.23	62.4231	18.155	15.99	97.0364	13.0268	16.03	75.2455	17.4904	15.54	63.22	18.7094	16.03	68.83	19.781	15.45
2014-01-01	20:45:00	2014-01-01 20:45:00	68.6	12.071	16.05	67.4231	19.803	15.79	102.336	14.7592	15.81	81.4455	17.9015	15.52	71.22	19.7206	15.77	75.23	20.2043	15.47
2014-01-01	21:00:00	2014-01-01 21:00:00	77.3	13.1384	15.98	76.1231	20.7359	15.72	111.236	15.4257	15.73	90.0455	18.1823	15.52	79.02	19.7672	15.66	82.43	20.5678	15.52
2014-01-01	21:15:00	2014-01-01 21:15:00	85.9	13.9883	15.94	85.0231	20.7387	15.65	119.636	15.776	15.73	97.5455	18.3269	15.54	87.12	19.4598	15.68	90.43	20.8628	15.57
2014-01-01	21:30:00	2014-01-01 21:30:00	94	14.7002	15.86	92.9231	21.0421	15.56	128.636	15.9891	15.72	106.045	18.4525	15.56	96.42	19.0295	15.73	99.63	21.0946	15.61
2014-01-01	21:45:00	2014-01-01 21:45:00	101.7	15.3099	15.78	99.4231	21.0615	15.54	136.036	16.3242	15.67	112.745	18.5345	15.59	104.12	18.8982	15.76	106.63	21.2327	15.64
2014-01-01	22:00:00	2014-01-01 22:00:00	106.9	15.7706	15.72	105.223	21.0063	15.53	141.936	16.5028	15.66	117.645	18.693	15.6	109.62	19.0871	15.76	111.23	21.3819	15.65
2014-01-01	22:15:00	2014-01-01 22:15:00	114.6	16.054	15.7	111.323	20.9814	15.54	148.236	16.4974	15.67	124.945	18.7231	15.61	115.92	19.4022	15.75	117.63	21.534	15.65
2014-01-01	22:30:00	2014-01-01 22:30:00	118.2	16.354	15.68	116.023	20.5705	15.57	153.736	16.5136	15.67	130.245	18.7614	15.61	121.12	19.6684	15.73	123.43	21.6612	15.65
2014-01-01	22:45:00	2014-01-01 22:45:00	122.7	16.6355	15.67	121.623	20.4301	15.58	157.936	16.5326	15.67	132.945	18.8434	15.62	124.52	20.3447	15.72	128.03	21.7691	15.65
2014-01-01	23:00:00	2014-01-01 23:00:00	128.8	16.8984	15.67	126.523	20.2264	15.61	163.236	16.6815	15.66	139.045	18.8899	15.62	130.32	21.0228	15.69	131.13	21.8744	15.65
2014-01-01	23:15:00	2014-01-01 23:15:00	136	17.1399	15.66	132.823	20.2841	15.63	170.836	17.0639	15.65	146.945	18.9529	15.62	138.52	21.5506	15.68	140.63	21.9768	15.65
2014-01-01	23:30:00	2014-01-01 23:30:00	140	17.4088	15.66	139.423	20.2511	15.63	176.836	17.5747	15.63	153.645	19.0295	15.62	144.62	21.7027	15.68	146.63	22.0544	15.66
2014-01-01	23:45:00	2014-01-01 23:45:00	147	17.6428	15.66	146.623	20.2896	15.63	183.836	17.8388	15.63	160.645	19.0432	15.64	151.72	21.6944	15.68	154.13	22.1015	15.66
2014-01-02	00:00:00	2014-01-02	155.8	17.8769	15.65	153.623	20.7166	15.61	188.736	18.0568	15.63	164.745	19.0679	15.64	157.62	21.6557	15.67	159.83	22.1292	15.66
2014-01-02	00:15:00	2014-01-02 00:15:00	157.7	18.155	15.63	154.523	20.9097	15.6	192.936	18.185	15.63	168.445	19.0542	15.64	160.12	21.6363	15.67	161.13	22.1653	15.66
2014-01-02	00:30:00	2014-01-02 00:30:00	160	18.4744	15.62	158.123	21.0808	15.59	195.136	18.2942	15.63	170.845	19.0624	15.65	162.52	21.664	15.67	164.43	22.2013	15.66
2014-01-02	00:45:00	2014-01-02 00:45:00	161.7	18.7368	15.61	160.623	21.1609	15.59	197.236	18.4061	15.63	172.645	19.0706	15.65	164.62	21.7387	15.67	166.13	22.2401	15.66
2014-01-02	01:00:00	2014-01-02 01:00:00	165	18.9803	15.6	165.123	21.2824	15.58	201.436	18.5099	15.63	177.445	19.0925	15.65	168.62	21.9519	15.68	169.83	22.29	15.67
2014-01-02	01:15:00	2014-01-02 01:15:00	166.6	19.1555	15.59	165.423	21.3018	15.57	201.136	18.6083	15.63	176.645	19.0624	15.65	168.22	22.0821	15.68	169.63	22.3566	15.67
2014-01-02	01:30:00	2014-01-02 01:30:00	164.3	19.3255	15.59	162.623	21.3239	15.57	199.536	18.6547	15.63	177.345	19.0487	15.65	166.12	22.1459	15.68	168.13	22.4065	15.68
2014-01-02	01:45:00	2014-01-02 01:45:00	165.2	19.4653	15.59	161.523	21.2879	15.58	198.036	18.6985	15.63	174.045	18.9967	15.64	165.32	22.1708	15.68	167.13	22.4482	15.68
2014-01-02	02:00:00	2014-01-02 02:00:00	159.8	19.608	15.59	159.623	21.3349	15.58	196.136	18.7258	15.63	171.445	18.9803	15.64	164.42	22.1958	15.69	164.93	22.4593	15.68
2014-01-02	02:15:00	2014-01-02 02:15:00	154.8	19.7343	15.6	151.423	21.2741	15.58	191.636	18.7422	15.63	164.945	18.9146	15.63	157.02	22.1985	15.69	160.13	22.4731	15.68
2014-01-02	02:30:00	2014-01-02 02:30:00	148.5	19.8634	15.61	147.823	21.241	15.59	185.836	18.7532	15.64	160.145	18.8407	15.62	151.72	22.229	15.69	153.13	22.487	15.68
2014-01-02	02:45:00	2014-01-02 02:45:00	144.9	19.9761	15.62	143.723	21.2355	15.59	180.036	18.7805	15.65	154.945	18.7778	15.64	146.32	22.2568	15.7	148.23	22.4593	15.67
2014-01-02	03:00:00	2014-01-02 03:00:00	138.3	20.0778	15.62	134.323	21.1305	15.6	173.436	18.775	15.66	147.945	18.7258	15.64	139.82	22.3178	15.7	141.63	22.3899	15.65
2014-01-02	03:15:00	2014-01-02 03:15:00	131.3	20.0998	15.63	129.323	20.8159	15.62	164.936	18.7231	15.68	140.545	18.7039	15.65	132.42	22.2373	15.69	133.13	22.2568	15.63
2014-01-02	03:30:00	2014-01-02 03:30:00	125.7	20.1136	15.64	122.723	20.7883	15.63	160.036	18.6957	15.68	135.345	18.5782	15.64	126.22	22.1375	15.69	127.13	22.0572	15.58
2014-01-02	03:45:00	2014-01-02 03:45:00	119.3	19.9788	15.67	116.123	19.5147	15.67	156.036	18.6821	15.68	130.145	18.3242	15.63	122.22	22.071	15.69	122.83	21.6142	15.48
2014-01-02	04:00:00	2014-01-02 04:00:00	112.1	19.6547	15.68	109.823	18.9283	15.66	148.236	18.6274	15.67	122.845	16.8523	15.54	115.12	21.963	15.7	115.53	21.1857	15.47
2014-01-02	04:15:00	2014-01-02 04:15:00	104.9	19.2816	15.69	101.823	18.6657	15.68	142.136	18.346	15.64	116.445	16.354	15.56	108.72	21.8273	15.7	109.33	20.7856	15.53
2014-01-02	04:30:00	2014-01-02 04:30:00	98.5	18.7641	15.73	96.1231	17.9233	15.71	134.236	17.053	15.59	107.545	16.054	15.56	100.62	21.4482	15.7	102.13	20.2649	15.64
2014-01-02	04:45:00	2014-01-02 04:45:00	92.3	18.1332	15.76	89.8231	17.5584	15.74	128.736	16.4811	15.63	102.345	15.8542	15.59	95.32	20.849	15.7	96.13	19.9486	15.66
2014-01-02	05:00:00	2014-01-02 05:00:00	84.3	17.5285	15.78	81.5231	16.8035	15.75	120.736	16.0053	15.68	93.4455	15.6735	15.65	87.72	20.5237	15.71	87.43	19.4489	15.65
2014-01-02	05:15:00	2014-01-02 05:15:00	76.4	16.9011	15.81	73.0231	16.4189	15.78	113.436	15.7571	15.71	84.9455	15.6519	15.7	80.42	19.8716	15.74	78.73	19.0432	15.75
2014-01-02	05:30:00	2014-01-02 05:30:00	69.8	16.2566	15.87	65.5231	15.892	15.8	106.636	15.5953	15.72	78.0455	15.5469	15.71	73.52	19.4297	15.76	71.43	18.652	15.77
2014-01-02	05:45:00	2014-01-02 05:45:00	64.2	15.528	15.95	59.7231	15.1566	15.86	99.9364	15.4311	15.74	71.9455	15.4418	15.7	67.62	18.9912	15.78	64.93	18.2177	15.79
2014-01-02	06:00:00	2014-01-02 06:00:00	57.6	14.8182	16.02	51.7231	14.2476	15.93	93.7364	15.0841	15.76	64.3455	15.388	15.7	60.92	18.3897	15.8	58.13	17.8497	15.8
2014-01-02	06:15:00	2014-01-02 06:15:00	52.5	14.1139	16.09	46.3231	13.2367	16.01	88.6364	14.5206	15.78	58.2455	15.3342	15.7	55.82	18.1223	15.83	50.83	17.5013	15.82
2014-01-02	06:30:00	2014-01-02 06:30:00	47.9	13.3697	16.18	40.6231	12.433	16.08	83.6364	14.1593	15.78	52.5455	15.2992	15.69	51.02	17.7598	15.85	45.43	17.167	15.83
2014-01-02	06:45:00	2014-01-02 06:45:00	43.4	12.531	16.29	35.0231	9.88169	16.21	78.9364	13.2633	15.82	46.9455	15.1889	15.71	46.42	17.4116	15.87	40.13	16.8685	15.84
2014-01-02	07:00:00	2014-01-02 07:00:00	39.1	11.5941	16.42	29.8231	8.25189	16.4	74.6364	12.277	15.89	42.0455	14.9041	15.74	41.82	17.0937	15.89	34.43	16.584	15.84
2014-01-02	07:15:00	2014-01-02 07:15:00	35.7	10.6005	16.55	25.4231	7.03607	16.52	70.6364	11.3995	15.95	37.1455	14.4162	15.8	38.22	16.817	15.91	30.33	16.3567	15.85
2014-01-02	07:30:00	2014-01-02 07:30:00	32.3	9.6741	16.64	21.0231	5.80468	16.66	67.1364	10.6084	16.01	32.8455	13.5268	15.87	34.22	16.5759	15.92	26.03	16.1242	15.85
2014-01-02	07:45:00	2014-01-02 07:45:00	28.7	8.81909	16.72	16.8231	4.89033	16.75	63.1364	9.62226	16.08	28.9455	12.9657	15.92	30.72	16.1809	15.93	21.93	15.9028	15.85
2014-01-02	08:00:00	2014-01-02 08:00:00	25.5	7.94776	16.81	13.3231	4.06451	16.82	60.0364	8.61856	16.15	25.0455	11.81	16.02	27.92	15.2696	15.94	18.33	15.6951	15.85
2014-01-02	08:15:00	2014-01-02 08:15:00	23.1	7.04365	16.91	11.0231	3.34481	16.9	57.1364	7.7693	16.23	22.4455	10.9405	16.12	24.82	14.5233	15.94	15.63	15.4957	15.84
2014-01-02	08:30:00	2014-01-02 08:30:00	20.8	6.14882	17.03	8.42308	2.69354	16.99	54.2364	7.01333	16.32	20.2455	9.98822	16.22	22.22	14.186	15.94	13.13	15.2508	15.84
2014-01-02	08:45:00	2014-01-02 08:45:00	19.4	5.26689	17.13	8.62308	2.16031	17.07	52.6364	6.29393	16.42	20.6455	9.05868	16.32	19.92	13.8254	15.95	13.93	15.0303	15.85
2014-01-02	09:00:00	2014-01-02 09:00:00	17.8	4.54536	17.21	7.22308	1.79768	17.14	50.6364	5.71766	16.51	20.2455	8.25701	16.43	18.02	13.3884	15.96	13.13	14.8343	15.85
2014-01-02	09:15:00	2014-01-02 09:15:00	16.6	3.88595	17.3	8.42308	1.49879	17.23	49.0364	5.12387	16.61	20.6455	7.50476	16.54	16.02	12.5124	16.03	14.63	14.6224	15.87
2014-01-02	09:30:00	2014-01-02 09:30:00	17.7	3.34005	17.38	13.1231	1.37875	17.28	49.9364	4.51853	16.73	25.4455	6.86693	16.64	15.92	11.0401	16.12	18.83	14.3814	15.9
2014-01-02	09:45:00	2014-01-02 09:45:00	21.2	2.907	17.46	20.2231	1.33671	17.3	52.6364	3.97756	16.86	32.4455	6.32399	16.7	19.52	9.60931	16.24	25.63	14.1727	15.92
2014-01-02	10:00:00	2014-01-02 10:00:00	28	2.5419	17.51	27.3231	1.31242	17.29	57.3364	3.46634	16.98	40.9455	5.85695	16.77	23.92	8.65453	16.35	33.53	13.5721	16.03
2014-01-02	10:15:00	2014-01-02 10:15:00	33.9	2.24083	17.54	32.7231	1.32346	17.29	63.9364	3.15014	17.04	46.0455	5.68785	16.78	30.42	10.0662	16.34	39.33	13.2979	16.03
2014-01-02	10:30:00	2014-01-02 10:30:00	40.2	2.01598	17.48	39.7231	1.64207	17.26	71.2364	3.39719	17.01	53.8455	5.74748	16.66	38.42	10.5953	16.28	47.23	13.1224	16.01
2014-01-02	10:45:00	2014-01-02 10:45:00	49.7	1.88612	17.41	49.3231	2.69588	17.11	79.8364	3.73925	16.92	63.2455	7.19287	16.33	47.22	10.6868	16.25	54.83	13.0109	15.99
2014-01-02	11:00:00	2014-01-02 11:00:00	59.4	1.9134	17.33	58.4231	5.49933	16.84	90.5364	4.15404	16.84	72.4455	9.72078	16.08	58.62	10.9327	16.27	64.23	13.056	15.96
2014-01-02	11:15:00	2014-01-02 11:15:00	69.9	2.39793	17.02	68.9231	7.04617	16.68	101.536	4.86579	16.77	82.8455	11.3391	15.95	69.92	13.2288	16.08	74.83	13.5002	15.9
2014-01-02	11:30:00	2014-01-02 11:30:00	78.7	3.56909	16.6	76.6231	10.7835	16.43	111.636	6.98554	16.49	91.3455	12.2057	15.92	80.82	15.1002	15.98	84.43	14.4135	15.83
2014-01-02	11:45:00	2014-01-02 11:45:00	89.6	4.82656	16.4	89.2231	13.9963	16.16	122.436	7.90949	16.39	101.745	13.0082	15.89	91.62	16.5109	15.91	94.13	15.1405	15.79
2014-01-02	12:00:00	2014-01-02 12:00:00	98.3	6.04891	16.32	97.3231	14.2636	16.06	132.836	8.84483	16.28	109.745	14.1486	15.86	100.92	17.273	15.9	104.13	15.8677	15.78
2014-01-02	12:15:00	2014-01-02 12:15:00	108.3	6.99564	16.33	105.523	13.1357	16.14	142.336	9.713	16.18	119.045	14.9095	15.85	110.62	17.7353	15.9	112.13	16.4081	15.79
2014-01-02	12:30:00	2014-01-02 12:30:00	107.1	7.7642	16.32	105.223	13.4789	16.14	144.736	10.1026	16.17	120.345	15.4687	15.86	110.92	17.689	15.94	113.53	16.8496	15.8
2014-01-02	12:45:00	2014-01-02 12:45:00	119.1	8.44148	16.3	119.223	15.24	16.05	149.936	10.3083	16.19	125.345	15.7005	15.87	115.72	17.6183	15.94	119.13	17.1779	15.8
2014-01-02	13:00:00	2014-01-02 13:00:00	116.1	9.29877	16.2	115.323	15.5792	16.02	153.336	10.6476	16.19	130.645	16.1539	15.86	120.92	17.6047	15.93	123.43	17.436	15.81
2014-01-02	13:15:00	2014-01-02 13:15:00	127.7	10.2901	16.08	127.423	15.8974	15.99	161.836	13.0985	16	138.245	16.6328	15.84	131.62	18.0623	15.89	132.23	17.7625	15.8
2014-01-02	13:30:00	2014-01-02 13:30:00	141.2	11.2971	16.04	137.223	16.4189	15.97	173.936	14.7404	15.87	153.245	17.0123	15.83	141.22	18.5481	15.88	141.93	18.1168	15.79
2014-01-02	13:45:00	2014-01-02 13:45:00	145.6	12.24	16.01	140.823	16.9608	15.95	179.136	15.353	15.84	156.045	17.1399	15.8	147.32	19.4489	15.86	149.33	18.4334	15.79
2014-01-02	14:00:00	2014-01-02 14:00:00	143	13.1915	15.98	141.623	17.7135	15.95	179.836	15.722	15.82	155.845	17.2567	15.8	148.22	19.8826	15.85	146.63	18.734	15.79
2014-01-02	14:15:00	2014-01-02 14:15:00	152.3	14.0177	15.98	148.023	18.3433	15.96	184.336	16.0621	15.8	162.845	17.4224	15.79	151.82	20.1988	15.84	157.83	19.0487	15.78
2014-01-02	14:30:00	2014-01-02 14:30:00	152.1	14.7512	15.98	151.123	18.5973	15.98	186.436	16.3567	15.81	159.945	17.8824	15.8	152.42	20.3227	15.84	157.23	19.3035	15.78
2014-01-02	14:45:00	2014-01-02 14:45:00	145.9	15.3611	15.99	145.223	18.5645	16	184.236	16.7005	15.86	158.845	17.689	15.81	149.02	20.4493	15.84	151.53	19.5174	15.78
2014-01-02	15:00:00	2014-01-02 15:00:00	148.7	15.865	15.99	146.323	18.6575	16	185.336	16.874	15.88	160.345	17.7898	15.84	149.02	20.5292	15.85	152.93	19.6766	15.79
2014-01-02	15:15:00	2014-01-02 15:15:00	144	16.2458	15.99	138.423	18.9666	15.95	179.736	17.0015	15.9	158.445	17.817	15.85	146.92	20.5981	15.85	149.23	19.8249	15.79
2014-01-02	15:30:00	2014-01-02 15:30:00	138.2	16.5759	15.99	136.323	19.0049	15.94	173.936	17.0992	15.91	146.645	17.7625	15.94	141.72	20.5154	15.86	140.83	19.9046	15.84
2014-01-02	15:45:00	2014-01-02 15:45:00	136.8	16.855	15.98	135.323	18.879	15.99	169.736	17.1969	15.9	147.845	17.6591	15.99	137.92	20.5237	15.87	140.43	19.9898	15.85
2014-01-02	16:00:00	2014-01-02 16:00:00	135.8	17.1019	15.98	132.623	18.8161	16.03	168.836	17.3137	15.89	145.445	17.6292	15.99	139.22	20.5375	15.87	137.33	20.0448	15.87
2014-01-02	16:15:00	2014-01-02 16:15:00	130.7	17.2621	16.02	126.023	18.7422	16.06	164.236	17.4904	15.87	141.645	17.5693	15.98	130.32	20.5237	15.88	132.93	20.0613	15.88
2014-01-02	16:30:00	2014-01-02 16:30:00	129.5	17.3898	16.07	127.423	18.6629	16.08	159.736	17.553	15.86	134.745	17.5176	15.97	130.32	20.5099	15.89	129.73	20.0806	15.87
2014-01-02	16:45:00	2014-01-02 16:45:00	122.3	17.4659	16.1	121.323	18.4034	16.13	157.336	17.5802	15.87	131.345	17.485	15.97	124.32	20.4686	15.92	123.73	20.0696	15.89
2014-01-02	17:00:00	2014-01-02 17:00:00	117.3	17.5339	16.12	113.723	18.1059	16.19	151.736	17.6128	15.87	127.445	17.4768	15.97	118.02	20.2676	16.05	118.43	20.0201	15.99
2014-01-02	17:15:00	2014-01-02 17:15:00	115.5	17.5367	16.13	113.023	17.8442	16.22	147.936	17.6128	15.9	124.145	17.4224	15.99	114.42	20.0778	16.1	115.73	19.8112	16.12
2014-01-02	17:30:00	2014-01-02 17:30:00	109	17.5312	16.13	105.523	16.9363	16.27	143.236	17.436	16	119.045	17.398	15.98	109.62	19.8936	16.1	111.43	19.6217	16.17
2014-01-02	17:45:00	2014-01-02 17:45:00	105.8	17.5176	16.15	103.823	16.7005	16.29	140.836	16.9445	16.13	116.545	17.4333	15.97	107.32	19.8497	16.09	109.23	19.49	16.13
2014-01-02	18:00:00	2014-01-02 18:00:00	98.1	17.4714	16.18	96.8231	16.5651	16.32	136.636	16.7032	16.16	110.545	17.398	16	100.92	19.7178	16.08	104.43	19.0953	16.25
2014-01-02	18:15:00	2014-01-02 18:15:00	91.6	16.9201	16.29	89.1231	15.0545	16.39	129.236	15.6277	16.26	103.245	17.2458	16.03	94.52	19.5806	16.08	100.23	18.6438	16.31
2014-01-02	18:30:00	2014-01-02 18:30:00	89.8	15.9325	16.51	86.0231	14.3385	16.46	123.836	14.5876	16.37	99.3455	16.9418	16.1	90.92	19.3474	16.1	92.13	18.2832	16.28
2014-01-02	18:45:00	2014-01-02 18:45:00	81.8	14.8826	16.64	80.2231	13.7187	16.52	118.736	13.8468	16.41	94.1455	16.1107	16.2	85.32	19.1035	16.13	86.33	17.8442	16.33
2014-01-02	19:00:00	2014-01-02 19:00:00	78.4	13.9883	16.72	74.5231	12.7986	16.59	115.036	13.141	16.47	90.0455	15.0142	16.34	80.02	18.8106	16.16	80.63	17.1344	16.49
2014-01-02	19:15:00	2014-01-02 19:15:00	77.1	13.2261	16.76	77.3231	11.9365	16.65	111.236	12.5601	16.52	85.3455	14.5876	16.36	79.62	18.5509	16.17	81.33	16.5569	16.53
2014-01-02	19:30:00	2014-01-02 19:30:00	75.5	12.6475	16.79	77.8231	10.6371	16.74	111.036	12.0737	16.56	91.4455	13.423	16.48	77.72	18.417	16.2	79.13	16.0323	16.55
2014-01-02	19:45:00	2014-01-02 19:45:00	73.3	12.1529	16.85	69.9231	8.71878	16.86	108.136	10.7495	16.69	86.1455	13.399	16.45	77.12	17.485	16.29	69.93	15.598	16.54
2014-01-02	20:00:00	2014-01-02 20:00:00	76.2	11.4836	16.93	72.1231	7.95797	16.93	109.636	10.6162	16.68	85.6455	12.6554	16.51	77.12	15.025	16.5	80.03	15.1244	16.57
2014-01-02	20:15:00	2014-01-02 20:15:00	76.9	10.9615	16.96	79.0231	7.79477	16.93	113.936	10.6345	16.64	88.9455	13.0985	16.43	83.62	14.4055	16.6	84.93	14.939	16.48
2014-01-02	20:30:00	2014-01-02 20:30:00	78	10.5509	16.98	75.4231	7.12708	16.98	114.336	10.862	16.57	93.2455	12.0974	16.53	85.72	14.5983	16.52	98.43	14.9712	16.39
2014-01-02	20:45:00	2014-01-02 20:45:00	82.1	9.70003	17	80.4231	7.1119	16.95	118.736	10.7913	16.55	96.0455	12.0024	16.51	88.42	15.0223	16.45	84.43	14.8343	16.41
2014-01-02	21:00:00	2014-01-02 21:00:00	83.9	9.07415	16.99	81.2231	10.225	16.91	117.636	10.7626	16.53	95.2455	11.9101	16.49	87.72	15.0303	16.43	88.43	14.7029	16.41
2014-01-02	21:15:00	2014-01-02 21:15:00	82.3	8.52356	16.98	79.5231	15.9621	16.41	118.936	10.7312	16.49	96.0455	11.7968	16.46	84.62	14.888	16.41	79.43	14.5662	16.4
2014-01-02	21:30:00	2014-01-02 21:30:00	81.9	7.9146	16.97	76.3231	15.9001	16.46	115.436	10.5849	16.46	95.2455	11.389	16.45	87.12	14.6975	16.39	89.43	14.4162	16.36
2014-01-02	21:45:00	2014-01-02 21:45:00	80.9	6.85684	17.03	77.5231	16.6626	16.49	112.536	10.009	16.49	90.0455	10.0506	16.54	79.62	14.5796	16.36	83.13	14.293	16.3
2014-01-02	22:00:00	2014-01-02 22:00:00	76.2	6.11384	17.06	73.4231	16.0918	16.46	109.736	8.67765	16.56	84.5455	8.91177	16.62	81.02	14.2449	16.37	76.23	14.0658	16.31
2014-01-02	22:15:00	2014-01-02 22:15:00	72.4	5.26442	17.09	71.8231	11.9207	16.7	109.736	7.81771	16.66	88.4455	8.61599	16.64	76.22	13.5934	16.39	78.73	13.8254	16.29
2014-01-02	22:30:00	2014-01-02 22:30:00	74.8	4.90505	17.05	77.8231	16.9825	16.32	110.836	7.19034	16.65	94.5455	8.44148	16.64	81.52	12.6184	16.43	76.03	13.5535	16.28
2014-01-02	22:45:00	2014-01-02 22:45:00	79.3	4.7286	17.01	79.8231	14.6224	16.59	121.336	6.90981	16.6	98.6455	8.36714	16.59	81.12	12.2665	16.36	89.43	13.0826	16.34
2014-01-02	23:00:00	2014-01-02 23:00:00	87.9	4.45031	16.97	87.9231	5.66301	16.69	122.936	7.45905	16.51	95.1455	8.04989	16.53	93.92	11.947	16.33	86.13	12.8065	16.28
2014-01-02	23:15:00	2014-01-02 23:15:00	92.9	4.31168	16.81	93.9231	8.54153	16.6	132.436	7.44636	16.46	112.145	8.00903	16.49	95.72	11.4678	16.29	108.83	12.5257	16.23
2014-01-02	23:30:00	2014-01-02 23:30:00	106	4.45518	16.64	102.423	7.7693	16.45	137.736	7.84829	16.39	122.745	9.22643	16.28	102.52	11.326	16.24	114.83	12.4622	16.15
2014-01-02	23:45:00	2014-01-02 23:45:00	109.2	4.97381	16.31	109.123	10.7757	16.02	148.136	9.04578	16.13	122.745	10.611	16.06	113.92	12.8463	16.09	116.03	12.6793	15.95
2014-01-03	00:00:00	2014-01-03	119.5	6.06139	15.94	108.623	11.4205	15.89	146.536	10.1573	15.95	133.445	11.9708	15.85	114.02	14.1299	15.92	120.53	13.0427	15.74
2014-01-03	00:15:00	2014-01-03 00:15:00	121	7.0108	15.82	114.723	11.6704	15.78	159.336	11.6177	15.74	135.645	12.6316	15.75	130.62	15.7355	15.74	120.63	13.3538	15.68
2014-01-03	00:30:00	2014-01-03 00:30:00	116.8	7.75656	15.75	120.923	12.7349	15.66	162.336	11.9628	15.68	143.445	12.3537	15.74	135.02	16.0107	15.67	135.53	13.6174	15.64
2014-01-03	00:45:00	2014-01-03 00:45:00	125.9	8.46456	15.65	121.423	13.165	15.59	159.736	11.8758	15.64	137.545	12.0895	15.68	132.72	16.4081	15.61	127.53	13.8655	15.57
2014-01-03	01:00:00	2014-01-03 01:00:00	122.7	9.07157	15.54	125.223	14.1299	15.48	159.036	11.7125	15.6	131.245	12.0262	15.62	125.22	16.0296	15.54	128.93	14.0284	15.49
2014-01-03	01:15:00	2014-01-03 01:15:00	127.3	9.66373	15.46	123.323	14.9095	15.42	159.836	11.5941	15.55	138.445	12.1027	15.56	132.72	16.2539	15.47	129.73	14.1513	15.46
2014-01-03	01:30:00	2014-01-03 01:30:00	118.9	10.2797	15.37	115.123	15.8623	15.38	159.336	11.5572	15.5	138.045	12.2348	15.52	120.92	16.0134	15.44	133.33	14.2155	15.44
2014-01-03	01:45:00	2014-01-03 01:45:00	118.5	10.7704	15.32	116.723	16.2269	15.34	154.836	11.5441	15.42	136.745	12.3352	15.45	124.92	16.2188	15.41	120.13	14.2609	15.38
2014-01-03	02:00:00	2014-01-03 02:00:00	118.2	11.2577	15.36	114.923	16.6436	15.31	152.136	11.5415	15.38	129.945	12.3061	15.4	119.32	15.6573	15.37	127.13	14.277	15.27
2014-01-03	02:15:00	2014-01-03 02:15:00	116.5	11.6651	15.35	119.223	17.0096	15.28	151.436	10.6423	15.21	129.545	12.3854	15.39	120.32	15.4795	15.33	127.53	14.293	15.19
2014-01-03	02:30:00	2014-01-03 02:30:00	116.4	12.1027	15.38	113.623	17.3083	15.25	152.936	9.63004	15.21	128.845	12.5601	15.38	117.72	15.076	15.27	120.63	14.2743	15.16
2014-01-03	02:45:00	2014-01-03 02:45:00	109.6	12.5627	15.39	109.023	17.4931	15.29	145.436	10.2302	15.23	122.745	12.6131	15.37	113.02	14.0871	15.22	115.83	14.2529	15.09
2014-01-03	03:00:00	2014-01-03 03:00:00	108.7	13.0109	15.38	105.523	17.5639	15.29	142.936	10.3761	15.25	119.945	12.6766	15.35	112.72	13.6974	15.2	111.13	14.2128	15.08
2014-01-03	03:15:00	2014-01-03 03:15:00	101.7	13.3618	15.36	100.723	17.6618	15.29	138.036	9.99602	15.26	115.945	12.6899	15.32	107.92	13.2208	15.17	110.03	13.9135	15.04
2014-01-03	03:30:00	2014-01-03 03:30:00	98.8	13.266	15.32	101.423	17.7925	15.29	135.236	8.56463	15.28	116.145	12.7376	15.34	103.52	12.5839	15.15	106.73	13.6921	15.03
2014-01-03	03:45:00	2014-01-03 03:45:00	96.8	13.25	15.34	94.9231	17.8633	15.28	132.436	10.311	15.27	112.645	12.9392	15.34	97.52	12.1001	15.16	97.53	13.4123	15.03
2014-01-03	04:00:00	2014-01-03 04:00:00	92.2	12.7721	15.4	88.2231	17.8878	15.28	127.536	10.35	15.27	102.245	12.9312	15.34	93.72	11.6862	15.15	94.03	13.1331	15.02
2014-01-03	04:15:00	2014-01-03 04:15:00	82.8	11.602	15.74	80.2231	17.9832	15.28	119.836	8.06266	15.25	94.1455	13.0002	15.32	85.22	11.2499	15.13	93.43	12.8198	15
2014-01-03	04:30:00	2014-01-03 04:30:00	79.8	10.917	15.9	74.9231	17.8388	15.31	115.636	7.24858	15.22	90.0455	9.33496	15.23	82.72	10.4648	15.07	88.83	12.4066	14.95
2014-01-03	04:45:00	2014-01-03 04:45:00	72.6	10.2719	16.03	70.8231	17.8252	15.35	109.936	6.56234	15.17	82.8455	8.26725	15.1	79.02	9.80121	15	75.53	12.0367	14.89
2014-01-03	05:00:00	2014-01-03 05:00:00	64	8.10099	16.28	61.5231	17.2349	15.51	101.536	6.15882	15.11	78.4455	7.78968	14.94	72.22	9.54195	14.92	72.43	11.6862	14.81
2014-01-03	05:15:00	2014-01-03 05:15:00	60.4	7.0487	16.21	53.0231	16.3459	15.57	95.5364	6.34654	14.94	70.8455	7.43113	14.77	66.62	9.74413	14.92	62.23	11.4284	14.72
2014-01-03	05:30:00	2014-01-03 05:30:00	55.9	6.22384	16.17	50.0231	5.90178	15.82	93.1364	6.75604	14.85	66.1455	7.30939	14.65	60.02	10.0038	14.93	58.13	11.1843	14.7
2014-01-03	05:45:00	2014-01-03 05:45:00	52	5.38795	16.3	45.3231	3.24261	15.97	88.3364	7.06387	14.83	60.6455	7.23338	14.55	58.22	10.1729	14.88	55.43	10.9772	14.67
2014-01-03	06:00:00	2014-01-03 06:00:00	47	4.5356	16.45	40.4231	1.86114	16.13	83.8364	7.23085	14.7	55.0455	7.22325	14.58	50.02	10.1443	14.84	45.73	10.7835	14.56
2014-01-03	06:15:00	2014-01-03 06:15:00	43.4	3.82577	16.46	34.0231	1.14999	16.21	78.1364	7.34742	14.56	49.5455	7.33981	14.55	45.12	9.98042	14.74	41.23	10.6293	14.41
2014-01-03	06:30:00	2014-01-03 06:30:00	39	3.18568	16.49	28.8231	0.525655	16.15	75.2364	7.23591	14.49	43.3455	7.33981	14.42	45.12	9.78564	14.59	37.83	10.4752	14.26
2014-01-03	06:45:00	2014-01-03 06:45:00	35.5	2.62346	16.45	24.9231	0.359992	16.06	70.6364	6.97039	14.37	39.9455	7.43621	14.28	38.42	9.70003	14.45	31.73	10.3318	14.09
2014-01-03	07:00:00	2014-01-03 07:00:00	31.8	2.20629	16.41	20.1231	0.332251	15.89	68.1364	6.2739	14.34	34.2455	7.41844	14.16	35.52	9.41254	14.36	27.53	10.2224	13.96
2014-01-03	07:15:00	2014-01-03 07:15:00	29.4	1.91795	16.41	16.7231	0.310585	15.79	64.2364	5.81215	14.27	30.5455	6.80895	14.22	28.32	9.00453	14.29	22.43	10.1157	13.81
2014-01-03	07:30:00	2014-01-03 07:30:00	25.9	1.77054	16.3	12.8231	0.31845	15.52	59.5364	4.82166	14.46	26.7455	6.03892	14.32	30.82	8.61085	14.19	19.23	10.0038	13.62
2014-01-03	07:45:00	2014-01-03 07:45:00	24.4	1.67805	15.96	8.82308	0.324359	15.03	57.8364	3.99204	14.67	24.7455	5.00084	14.46	30.42	8.24933	14.07	17.33	9.84794	13.46
2014-01-03	08:00:00	2014-01-03 08:00:00	21.2	1.59943	14.99	5.12308	0.458386	14.51	55.7364	3.25685	14.71	18.8455	4.69679	14.28	23.72	7.97584	13.91	13.13	9.68188	13.26
2014-01-03	08:15:00	2014-01-03 08:15:00	20	1.48765	14.46	2.32308	0.58122	14.08	54.2364	2.69354	14.73	17.1455	4.26798	14.12	18.02	7.61914	13.71	9.43	9.47723	12.94
2014-01-03	08:30:00	2014-01-03 08:30:00	17.7	1.37654	14.06	1.12308	0.603983	13.73	50.1364	2.31696	14.71	14.0455	3.79932	13.99	18.42	7.4946	13.46	5.93	9.30394	12.53
2014-01-03	08:45:00	2014-01-03 08:45:00	17.1	1.27055	13.48	0.723077	0.00519151	13.18	50.8364	2.05485	14.67	14.2455	2.76377	14.45	19.72	7.42098	13.26	6.03	9.10511	12.36
2014-01-03	09:00:00	2014-01-03 09:00:00	15.2	1.16746	13.03	0.923077	0.00519151	11.77	48.8364	1.81806	14.69	9.74545	1.79315	15.01	18.42	7.48698	13.08	2.53	4.47954	11.69
2014-01-03	09:15:00	2014-01-03 09:15:00	15.5	1.07813	12.49	1.32308	0.00519151	8.48	48.2364	1.65556	14.81	8.84545	1.48765	15.18	15.92	6.07387	13.29	3.03	3.4735	11.35
2014-01-03	09:30:00	2014-01-03 09:30:00	15	1.00665	11.85	1.52308	0.00519151	6.51	46.3364	1.52558	14.92	6.64545	1.28376	15.28	13.42	5.8221	13.17	2.33	3.34243	11.22
2014-01-03	09:45:00	2014-01-03 09:45:00	14.1	0.954927	11.18	1.72308	0.00379651	5.65	45.2364	1.43645	14.92	5.74545	1.09769	15.35	13.12	4.45274	13.49	2.53	3.28061	10.37
2014-01-03	10:00:00	2014-01-03 10:00:00	12.7	0.918423	10.38	1.72308	0.00379651	4.94	43.1364	1.32346	14.91	3.84545	1.0586	15.42	10.82	4.1274	13.44	2.43	3.25923	8.36
2014-01-03	10:15:00	2014-01-03 10:15:00	12.7	0.871356	11.15	1.92308	0.00379651	4.98	43.8364	1.22879	14.99	3.24545	0.982918	15.57	11.52	3.17146	13.63	2.63	3.25448	6.88
2014-01-03	10:30:00	2014-01-03 10:30:00	12.7	0.826619	12.18	2.42308	0.00379651	5.54	42.7364	1.12817	15.14	3.74545	0.155388	15.55	10.62	3.09808	13.54	3.13	3.24736	6.01
2014-01-03	10:45:00	2014-01-03 10:45:00	10.5	0.784194	12.9	1.92308	0.00379651	5.76	40.1364	1.04342	15.21	2.44545	0.0202829	15.5	8.12	2.83883	13.49	2.63	3.23786	5.64
2014-01-03	11:00:00	2014-01-03 11:00:00	10.9	0.746168	13.38	1.72308	0.00379651	6.31	39.3364	0.985074	15.3	2.44545	0.0202829	15.58	6.42	2.34932	13.81	2.43	3.22837	5.54
2014-01-03	11:15:00	2014-01-03 11:15:00	9.6	0.7167	13.69	1.42308	0.00379651	6.34	40.5364	0.909851	15.48	2.04545	0.018712	15.5	11.92	1.95438	14.02	2.63	3.21413	5.81
2014-01-03	11:30:00	2014-01-03 11:30:00	9.6	0.689424	13.89	1.32308	0.00379651	6.88	38.7364	0.86282	15.64	1.84545	0.0202829	15.21	8.32	1.6578	14.29	2.13	3.20465	5.55
2014-01-03	11:45:00	2014-01-03 11:45:00	9	0.664323	14.07	1.32308	0.00379651	7.01	38.9364	0.805384	15.74	1.84545	0.0202829	15.33	3.12	1.42534	14.47	2.13	3.18805	5.63
2014-01-03	12:00:00	2014-01-03 12:00:00	9.6	0.643464	14.37	1.22308	0.00379651	7.19	37.3364	0.779961	15.83	1.84545	0.0218637	14.95	5.22	1.26835	14.59	2.23	3.1762	5.74
2014-01-03	12:15:00	2014-01-03 12:15:00	8.2	0.622659	14.56	1.62308	0.00379651	6.9	36.8364	0.731422	15.92	1.84545	0.0298974	15.75	4.72	1.38319	14.39	2.23	3.15251	6.11
2014-01-03	12:30:00	2014-01-03 12:30:00	7.5	0.606056	14.71	1.02308	0.00379651	7.72	36.4364	0.708298	16.02	7.74545	0.326331	16.44	4.72	1.24856	14.87	1.73	3.13357	7.51
2014-01-03	12:45:00	2014-01-03 12:45:00	8.2	0.589489	14.86	0.823077	0.00379651	8.32	36.6364	0.681049	16.17	12.7455	0.314515	16.51	2.92	1.16309	15.12	6.03	4.72615	12.95
2014-01-03	13:00:00	2014-01-03 13:00:00	9.8	0.577088	15.13	4.22308	0.39992	15.11	40.3364	0.674773	16.35	20.6455	0.302736	16.58	3.72	1.23977	14.88	12.13	3.82337	15.38
2014-01-03	13:15:00	2014-01-03 13:15:00	15	0.564709	15.2	13.3231	0.375923	15.63	44.3364	0.653887	16.44	28.2455	0.304697	16.56	7.72	1.20467	15.12	20.03	3.20702	15.65
2014-01-03	13:30:00	2014-01-03 13:30:00	19.6	0.55441	15.85	18.7231	0.389907	16.04	48.4364	0.630975	16.51	35.5455	0.354033	16.32	11.72	1.08682	15.68	27.83	2.85293	15.68
2014-01-03	13:45:00	2014-01-03 13:45:00	26.8	0.544126	16.15	26.3231	0.387906	15.7	53.7364	0.608129	16.43	43.3455	0.448261	16.39	16.12	1.27716	15.63	35.43	2.52328	15.76
2014-01-03	14:00:00	2014-01-03 14:00:00	32.7	0.531806	16.24	35.2231	0.248274	16.64	59.1364	0.599839	16.28	51.4455	0.50928	16.1	24.52	1.82259	15.31	44.23	2.2247	15.9
2014-01-03	14:15:00	2014-01-03 14:15:00	40	0.529755	15.71	41.8231	0.338181	16.16	67.6364	0.593627	16.17	59.8455	0.470561	15.74	34.02	1.74117	15.4	51.33	2.00228	15.24
2014-01-03	14:30:00	2014-01-03 14:30:00	47.5	0.527705	15.58	48.5231	0.454334	15.29	74.3364	0.589489	16.05	65.4455	0.497026	15.2	43.22	1.66005	15.36	56.23	1.81806	14.67
2014-01-03	14:45:00	2014-01-03 14:45:00	53.9	0.529755	15.55	53.2231	3.34005	13.71	84.9364	0.587421	15.93	69.5455	0.533858	14.66	52.52	1.61737	15.28	61.13	2.03427	14.3
2014-01-03	15:00:00	2014-01-03 15:00:00	58.8	0.556469	15.28	58.1231	2.90465	13.58	92.3364	0.595697	15.76	74.6455	0.597768	13.61	58.02	1.58822	15.17	65.43	2.4211	13.88
2014-01-03	15:15:00	2014-01-03 15:15:00	64.2	0.714599	14.46	62.8231	2.57683	13.49	97.0364	0.601911	15.62	78.7455	0.892725	13.71	63.42	2.84823	14.76	69.43	2.95409	13.62
2014-01-03	15:30:00	2014-01-03 15:30:00	67.4	0.903426	14.17	65.1231	3.09098	13.61	101.936	0.612278	15.38	80.9455	3.28536	13.84	72.02	4.4357	14.29	72.63	3.48783	13.46
2014-01-03	15:45:00	2014-01-03 15:45:00	72.4	1.10422	13.92	69.9231	3.04372	13.69	107.736	0.628895	15.02	86.7455	4.89769	13.69	75.02	5.03773	13.97	77.63	4.02102	13.37
2014-01-03	16:00:00	2014-01-03 16:00:00	75.3	1.30801	13.75	71.6231	3.226	13.78	107.936	0.639299	14.76	87.2455	6.0539	13.53	76.82	5.20274	13.9	80.43	4.53804	13.16
2014-01-03	16:15:00	2014-01-03 16:15:00	73.5	1.4921	13.72	71.1231	3.54039	13.82	108.336	0.651801	14.56	88.0455	6.72331	13.46	76.82	6.54977	13.64	79.13	4.93205	13.05
2014-01-03	16:30:00	2014-01-03 16:30:00	76	1.66005	13.69	75.6231	3.65768	13.79	109.336	0.683142	14.47	89.5455	7.12961	13.42	79.02	6.67045	13.5	81.03	5.23974	13.01
2014-01-03	16:45:00	2014-01-03 16:45:00	74.6	1.80673	13.64	72.1231	3.57866	13.77	109.536	1.45647	14.31	89.1455	7.63694	13.41	78.52	6.56234	13.55	80.63	5.47704	12.98
2014-01-03	17:00:00	2014-01-03 17:00:00	74.2	1.93844	13.6	72.0231	3.39004	13.68	108.336	2.10523	14.14	86.1455	7.78204	13.41	76.02	6.03643	13.55	80.13	5.6804	12.95
2014-01-03	17:15:00	2014-01-03 17:15:00	73.1	2.05256	13.5	70.3231	3.32815	13.6	106.936	2.26849	14.13	85.8455	7.56066	13.29	74.72	5.61833	13.62	77.83	5.81215	12.98
2014-01-03	17:30:00	2014-01-03 17:30:00	71.9	2.15342	13.36	70.4231	3.98963	13.55	106.636	2.46518	14.06	85.2455	7.69037	13.29	74.12	5.92919	13.52	77.93	5.88185	13.04
2014-01-03	17:45:00	2014-01-03 17:45:00	70.1	2.24543	13.19	68.2231	3.57866	13.45	104.836	2.65148	13.82	83.5455	7.64711	13.13	72.72	5.9591	13.42	75.53	5.87936	13.11
2014-01-03	18:00:00	2014-01-03 18:00:00	66.8	2.33082	13.1	64.6231	3.38766	13.15	101.336	2.68887	13.66	78.7455	7.56574	13.09	69.12	5.79224	13.3	70.93	5.75494	13.11
2014-01-03	18:15:00	2014-01-03 18:15:00	65.6	2.39793	13.17	62.6231	3.41864	13.05	100.436	2.71927	13.5	78.9455	7.833	13.19	68.52	5.48447	13.23	70.23	5.65805	13.09
2014-01-03	18:30:00	2014-01-03 18:30:00	61.8	2.44894	13.23	59.3231	3.38766	13.04	96.9364	2.55121	13.19	74.3455	7.9248	13.23	64.72	5.30392	13.19	66.13	5.5365	13.07
2014-01-03	18:45:00	2014-01-03 18:45:00	59.3	2.39561	13.83	56.0231	3.03428	13.05	94.6364	2.23161	12.94	70.6455	7.80497	13.25	62.62	5.09432	13.12	62.93	5.3929	13.02
2014-01-03	19:00:00	2014-01-03 19:00:00	56.5	2.24543	14.38	52.5231	2.40951	13.33	91.2364	1.98402	12.81	67.8455	6.32148	13.12	60.52	4.76042	13.09	59.83	5.17315	12.89
2014-01-03	19:15:00	2014-01-03 19:15:00	53.2	2.12128	14.73	49.6231	1.20029	14.04	88.5364	1.79315	12.75	64.8455	5.12387	12.88	55.82	4.37001	13.14	56.53	4.97627	12.78
2014-01-03	19:30:00	2014-01-03 19:30:00	50.4	1.99543	14.93	46.7231	1.19591	14.37	85.2364	1.60615	12.75	61.2455	4.23401	12.85	53.42	4.0017	13.25	52.73	4.7237	12.67
2014-01-03	19:45:00	2014-01-03 19:45:00	48.4	1.87022	15.14	45.3231	1.14562	14.58	82.7364	1.34998	13.25	60.4455	3.95585	12.72	51.32	3.69845	13.44	51.83	4.60393	12.65
2014-01-03	20:00:00	2014-01-03 20:00:00	46.2	1.71861	15.3	42.6231	0.946328	14.74	80.7364	1.15217	13.74	57.8455	3.54278	12.48	49.32	3.46396	13.61	50.33	4.42596	12.57
2014-01-03	20:15:00	2014-01-03 20:15:00	44.8	1.57478	15.42	42.1231	0.695711	14.89	79.4364	1.0153	14.02	56.9455	2.84823	12.34	47.02	3.20465	13.69	49.33	4.66745	12.67
2014-01-03	20:30:00	2014-01-03 20:30:00	44.3	1.43867	15.51	41.4231	0.55441	14.98	78.8364	0.914136	14.19	56.2455	2.9753	12.32	45.12	3.00831	13.72	48.83	5.05003	12.95
2014-01-03	20:45:00	2014-01-03 20:45:00	43.6	1.30801	15.6	41.2231	0.476658	15	78.8364	0.882036	14.18	56.9455	3.24261	12.29	47.52	2.8177	13.65	49.63	5.69033	13.3
2014-01-03	21:00:00	2014-01-03 21:00:00	43.4	1.20686	15.69	39.9231	0.454334	14.94	76.8364	0.867087	14.04	55.6455	4.28011	12.78	45.62	2.738	13.54	47.63	6.28141	13.46
2014-01-03	21:15:00	2014-01-03 21:15:00	44.1	1.10422	15.74	43.3231	0.454334	14.79	77.9364	0.85216	13.92	57.6455	8.09332	13.25	47.22	2.67484	13.43	49.33	6.85937	13.48
2014-01-03	21:30:00	2014-01-03 21:30:00	43	1.01097	15.75	41.1231	0.385907	14.74	77.6364	0.828745	14.03	56.7455	9.14897	13.36	46.22	2.63747	13.33	47.93	7.37531	13.48
2014-01-03	21:45:00	2014-01-03 21:45:00	42.9	0.93344	15.69	40.6231	0.344118	14.78	76.8364	0.813873	14.14	55.0455	9.33237	13.39	44.72	2.58149	13.3	47.63	7.83555	13.47
2014-01-03	22:00:00	2014-01-03 22:00:00	44.3	0.867087	15.57	41.8231	0.298818	14.91	77.8364	0.815996	14.18	56.9455	9.6404	13.39	47.52	2.4675	13.34	48.83	8.2391	13.43
2014-01-03	22:15:00	2014-01-03 22:15:00	46.4	0.813873	15.38	44.8231	0.283186	14.96	80.2364	0.81812	14.18	59.1455	9.86351	13.37	47.52	2.44661	13.44	51.63	8.59801	13.41
2014-01-03	22:30:00	2014-01-03 22:30:00	49.5	0.773616	15.07	48.3231	0.292948	14.83	82.0364	0.809627	14.08	63.0455	10.2094	13.34	50.42	4.62103	13.24	54.83	8.87057	13.37
2014-01-03	22:45:00	2014-01-03 22:45:00	52.9	0.746168	14.71	51.1231	0.314515	14.56	85.6364	0.81812	13.94	66.9455	10.8044	13.32	54.62	7.35502	13.07	57.93	9.45911	13.27
2014-01-03	23:00:00	2014-01-03 23:00:00	57.6	0.746168	14.38	56.0231	8.82424	14.24	91.1364	3.35909	13.9	72.8455	12.0869	13.25	60.72	9.70263	13.03	63.93	10.113	13.16
2014-01-03	23:15:00	2014-01-03 23:15:00	59.1	0.892725	14.02	57.3231	10.4544	14.19	93.8364	5.43001	13.53	73.2455	12.9631	13.08	62.12	9.95183	13	65.43	10.7181	13.05
2014-01-03	23:30:00	2014-01-03 23:30:00	62.8	1.04342	13.88	61.4231	14.1673	13.78	98.7364	6.4644	13.44	78.0455	13.4017	12.96	67.82	10.0324	12.97	69.23	11.2525	12.99
2014-01-03	23:45:00	2014-01-03 23:45:00	66	1.79994	13.73	65.1231	15.8137	13.42	100.436	6.88963	13.31	80.9455	14.1326	12.9	69.62	10.5509	12.91	72.63	11.7125	12.92
2014-01-04	00:00:00	2014-01-04	71.3	3.2521	13.55	68.9231	16.5461	13.21	104.036	7.77439	13.12	83.5455	15.1405	12.86	72.62	10.6946	12.67	75.53	12.137	12.9
2014-01-04	00:15:00	2014-01-04 00:15:00	77.3	4.96153	13.34	76.9231	16.668	13.12	111.936	9.24193	12.89	93.0455	15.4337	12.83	76.42	11.7441	12.46	83.53	12.5019	12.88
2014-01-04	00:30:00	2014-01-04 00:30:00	83.3	6.42175	13.16	80.4231	16.603	13.03	117.736	9.92585	12.79	95.8455	15.4499	12.8	83.82	11.2971	12.39	87.63	12.7853	12.8
2014-01-04	00:45:00	2014-01-04 00:45:00	90.5	7.29165	12.79	90.6231	16.3188	12.96	124.636	10.5327	12.77	105.245	15.5038	12.77	94.32	10.5849	12.26	98.93	12.9631	12.66
2014-01-04	01:00:00	2014-01-04 01:00:00	98.6	7.77949	12.6	97.3231	15.9298	12.86	134.236	10.8044	12.7	115.045	16.4	12.77	103.12	10.1703	12.02	105.93	13.0985	12.58
2014-01-04	01:15:00	2014-01-04 01:15:00	105	7.82026	12.17	103.123	15.5792	12.75	139.736	10.9536	12.69	120.445	16.7737	12.79	107.92	10.0194	11.81	112.23	13.1782	12.45
2014-01-04	01:30:00	2014-01-04 01:30:00	111.9	7.94521	11.77	109.923	15.598	12.66	146.136	11.1292	12.7	126.945	17.1589	12.8	113.92	10.1417	11.66	116.83	13.2926	12.43
2014-01-04	01:45:00	2014-01-04 01:45:00	116.1	8.30822	11.85	112.723	15.6088	12.58	151.036	11.481	12.76	128.545	17.4387	12.79	117.22	11.0086	11.64	121.33	13.4177	12.4
2014-01-04	02:00:00	2014-01-04 02:00:00	119.7	8.89375	12.12	118.223	15.8488	12.54	154.236	11.9549	12.84	134.645	17.3735	12.77	122.92	12.071	11.72	125.43	13.6148	12.41
2014-01-04	02:15:00	2014-01-04 02:15:00	122.4	9.49794	12.21	121.623	16.3161	12.53	157.236	12.2004	12.69	135.645	17.7244	12.74	121.22	12.5521	11.73	130.63	13.8041	12.36
2014-01-04	02:30:00	2014-01-04 02:30:00	125.2	10.1235	12.3	124.123	16.6978	12.51	161.136	12.0578	12.36	137.245	17.7217	12.7	131.92	13.9429	11.78	131.33	14.007	12.31
2014-01-04	02:45:00	2014-01-04 02:45:00	128	10.7051	12.24	124.823	17.0394	12.47	162.536	12.108	11.68	141.545	17.6781	12.61	132.42	14.3252	11.71	133.93	14.2128	12.23
2014-01-04	03:00:00	2014-01-04 03:00:00	128	11.3601	12.34	124.623	17.4496	12.47	162.136	13.0109	12.2	139.545	17.4088	12.5	129.02	15.6466	11.92	132.23	14.4617	12.26
2014-01-04	03:15:00	2014-01-04 03:15:00	130.7	11.9576	12.36	129.823	17.4387	12.46	164.036	13.4549	12.29	142.445	17.2567	12.49	132.32	15.7598	11.92	134.93	14.7646	12.34
2014-01-04	03:30:00	2014-01-04 03:30:00	129	12.5098	12.37	128.123	17.4279	12.49	164.336	13.9028	12.42	141.545	17.1127	12.47	132.42	15.892	11.93	134.93	15.0975	12.35
2014-01-04	03:45:00	2014-01-04 03:45:00	123.5	12.979	12.39	120.623	17.4714	12.46	159.836	14.4831	12.51	137.045	17.0394	12.45	128.12	16.0242	11.9	129.43	15.388	12.35
2014-01-04	04:00:00	2014-01-04 04:00:00	119.6	13.4123	12.41	118.523	17.4632	12.42	154.236	14.7646	12.52	132.745	16.9336	12.41	122.12	15.2427	11.53	123.13	15.6331	12.31
2014-01-04	04:15:00	2014-01-04 04:15:00	115.7	13.7641	12.45	113.223	17.3436	12.39	147.636	14.9068	12.47	127.245	16.8875	12.4	115.52	13.7961	11.14	119.93	15.8758	12.37
2014-01-04	04:30:00	2014-01-04 04:30:00	109.9	14.0845	12.38	106.523	17.3518	12.4	146.236	13.4336	12.04	122.945	16.7737	12.38	114.92	13.2075	11.06	113.73	16.081	12.43
2014-01-04	04:45:00	2014-01-04 04:45:00	106.6	13.8548	11.58	103.623	17.4496	12.42	140.736	11.284	11.37	120.245	16.9011	12.47	108.12	12.7005	10.96	112.13	16.2539	12.48
2014-01-04	05:00:00	2014-01-04 05:00:00	103.8	13.2474	10.96	101.223	17.3844	12.42	138.336	11.1633	11.53	115.445	16.8631	12.46	107.32	12.2136	10.97	110.03	16.3918	12.51
2014-01-04	05:15:00	2014-01-04 05:15:00	97	12.7747	10.92	95.1231	16.9553	12.25	132.536	10.4361	11.53	109.845	16.8929	12.44	98.52	11.6256	10.97	103.73	16.5109	12.51
2014-01-04	05:30:00	2014-01-04 05:30:00	92.1	12.3801	10.97	89.9231	16.8062	12.14	127.136	8.3697	11.04	104.845	16.8387	12.4	96.62	11.1528	10.99	97.03	16.5326	12.37
2014-01-04	05:45:00	2014-01-04 05:45:00	86.7	12.0605	11.29	83.2231	14.1326	12	121.936	7.4489	11.03	99.4455	16.8116	12.4	89.52	10.3787	11.04	91.23	15.0008	11.26
2014-01-04	06:00:00	2014-01-04 06:00:00	83	11.723	11.76	80.0231	12.9631	12.11	117.936	7.23085	11.12	94.2455	16.8279	12.4	82.22	9.81419	11.07	86.33	14.0337	11.15
2014-01-04	06:15:00	2014-01-04 06:15:00	77.1	10.5039	12.34	73.5231	10.8463	12.22	113.136	7.12202	11.2	88.4455	15.8893	12.28	81.92	9.13091	11.08	82.13	13.064	11.14
2014-01-04	06:30:00	2014-01-04 06:30:00	73.7	9.58081	12.79	70.3231	8.65966	12.49	107.536	6.99312	11.22	83.6455	14.7351	12.16	77.92	8.94526	11.12	75.53	12.3167	11.13
2014-01-04	06:45:00	2014-01-04 06:45:00	67.9	8.82167	12.98	62.9231	6.3315	12.7	102.636	6.76108	11.43	77.4455	12.7986	11.87	67.82	9.04578	11.55	71.23	11.8574	11.51
2014-01-04	07:00:00	2014-01-04 07:00:00	62.1	7.95797	13.15	58.1231	5.46714	12.84	97.1364	6.12383	11.85	73.5455	10.0298	11.06	62.22	8.54923	11.89	63.93	11.1502	11.85
2014-01-04	07:15:00	2014-01-04 07:15:00	57.6	7.19793	13.35	51.3231	4.37487	12.86	94.2364	5.69778	11.99	66.7455	9.79861	10.99	58.22	8.12655	12.13	57.73	10.5144	11.99
2014-01-04	07:30:00	2014-01-04 07:30:00	51.8	6.49201	13.56	45.6231	2.92112	13.05	86.1364	5.51172	11.95	60.8455	9.28585	10.78	57.52	7.96563	12.18	52.33	9.99862	12.02
2014-01-04	07:45:00	2014-01-04 07:45:00	47.9	5.85446	13.81	42.3231	2.22931	13.44	83.6364	5.44733	11.82	57.4455	8.49791	10.98	54.02	8.07288	12.12	47.63	9.6404	11.96
2014-01-04	08:00:00	2014-01-04 08:00:00	44.5	5.16576	14.12	37.4231	1.58822	13.66	80.8364	5.44981	11.68	53.0455	8.13422	11.11	47.82	8.26725	11.92	42.73	9.31686	11.88
2014-01-04	08:15:00	2014-01-04 08:15:00	40.9	4.45031	14.43	32.8231	0.911993	14.08	76.5364	5.18055	11.71	46.4455	7.89674	11.14	44.72	8.4466	11.64	38.53	9.03031	11.72
2014-01-04	08:30:00	2014-01-04 08:30:00	37.5	3.80172	14.77	27.6231	0.365959	14.48	73.3364	4.91487	11.72	42.5455	7.34234	11.19	40.92	7.78204	11.55	33.13	8.85513	11.46
2014-01-04	08:45:00	2014-01-04 08:45:00	33.8	3.29962	14.99	24.4231	0.257934	14.75	69.5364	4.84372	11.7	38.7455	6.82407	11.27	38.62	7.3246	11.7	30.43	8.70593	11.29
2014-01-04	09:00:00	2014-01-04 09:00:00	31.4	2.91641	15.07	19.9231	0.238643	14.8	66.2364	5.24221	11.63	34.0455	6.78123	11.26	32.92	7.09167	11.77	25.13	8.5595	11.28
2014-01-04	09:15:00	2014-01-04 09:15:00	28.7	2.57916	15.1	16.4231	0.230962	14.79	63.1364	5.05495	11.87	31.1455	6.78627	11.22	32.12	6.84676	11.76	22.83	8.3697	11.37
2014-01-04	09:30:00	2014-01-04 09:30:00	26.4	2.29617	15.1	14.0231	0.227129	14.77	61.1364	4.20734	12.57	28.6455	6.32148	11.29	29.82	6.68807	11.75	19.93	8.18792	11.38
2014-01-04	09:45:00	2014-01-04 09:45:00	24.1	2.05942	15.11	11.7231	0.529755	14.75	58.0364	3.39481	13.07	26.7455	6.08136	11.41	24.72	6.4368	11.74	18.43	8.02179	11.34
2014-01-04	10:00:00	2014-01-04 10:00:00	23	1.8566	15.11	12.5231	0.415984	14.72	57.3364	2.67017	13.38	27.0455	6.30896	11.12	23.62	6.10135	11.72	18.93	7.9197	11.28
2014-01-04	10:15:00	2014-01-04 10:15:00	21.9	1.68255	15.13	11.8231	0.782077	14.71	55.8364	2.11899	13.59	26.5455	5.73754	11.3	25.12	5.89929	11.7	17.73	7.87889	11.12
2014-01-04	10:30:00	2014-01-04 10:30:00	21	1.53451	15.14	12.3231	1.26615	14.73	54.5364	1.75246	13.76	27.0455	2.84353	12.79	20.72	6.19883	11.7	18.53	7.81006	11.04
2014-01-04	10:45:00	2014-01-04 10:45:00	20.2	1.40758	15.14	11.8231	1.10857	14.76	52.6364	1.60615	13.83	27.8455	3.34481	12.82	20.92	6.23886	11.69	19.73	7.7311	11.11
2014-01-04	11:00:00	2014-01-04 11:00:00	21	1.32346	15.15	17.4231	0.892725	14.76	54.0364	1.46537	13.99	31.1455	2.79659	13.01	19.52	6.36659	11.66	24.13	7.66492	11.23
2014-01-04	11:15:00	2014-01-04 11:15:00	24.6	1.27275	15.21	22.3231	0.779961	14.75	55.1364	1.29919	14.24	36.6455	2.31927	13.41	24.12	6.20383	11.65	29.73	7.48698	11.51
2014-01-04	11:30:00	2014-01-04 11:30:00	28.9	1.22221	15.3	27.5231	0.546182	14.46	60.2364	1.18277	14.45	43.8455	1.93616	14.32	26.22	5.62081	12.24	36.13	7.41337	11.59
2014-01-04	11:45:00	2014-01-04 11:45:00	35.3	1.16965	15.41	35.5231	0.591558	14.94	65.2364	1.10204	14.66	51.5455	3.11937	13.88	31.92	7.13467	12.37	43.43	7.28911	11.78
2014-01-04	12:00:00	2014-01-04 12:00:00	41.3	1.11946	15.51	42.9231	0.369942	15.33	71.9364	1.6578	14.5	58.9455	2.68185	14.41	39.92	6.8518	12.24	50.63	6.93505	12.81
2014-01-04	12:15:00	2014-01-04 12:15:00	49.5	1.0803	15.39	50.5231	0.839382	15.29	80.3364	2.2731	14.3	67.4455	8.30054	13.12	46.82	6.38413	12.52	59.13	7.07398	12.24
2014-01-04	12:30:00	2014-01-04 12:30:00	58.4	1.03909	15.35	58.8231	1.91113	14.63	89.4364	2.53259	14.25	75.2455	11.3654	12.22	57.52	6.18132	12.82	66.83	7.47429	11.36
2014-01-04	12:45:00	2014-01-04 12:45:00	67.4	1.10639	15.17	66.1231	2.28694	14.48	99.6364	2.86232	14.23	82.6455	10.6841	12	66.82	7.99626	12.44	74.13	7.81006	11.38
2014-01-04	13:00:00	2014-01-04 13:00:00	72.6	1.26615	14.76	72.3231	3.49499	14.48	106.436	3.56909	13.93	88.2455	10.1078	11.98	75.42	9.68966	11.69	79.93	7.9835	11.3
2014-01-04	13:15:00	2014-01-04 13:15:00	82.3	1.53004	14.36	80.7231	5.13865	13.42	114.836	3.83058	13.91	97.4455	9.68966	11.94	84.02	9.94924	11.47	87.83	8.16746	11.14
2014-01-04	13:30:00	2014-01-04 13:30:00	90.3	1.93844	13.46	89.8231	6.09885	12.84	123.636	4.3457	13.79	106.145	9.64559	11.95	92.02	9.97262	11.3	96.03	8.31846	11.17
2014-01-04	13:45:00	2014-01-04 13:45:00	95	2.42574	13	96.2231	6.92243	12.56	131.936	5.52658	13.04	111.545	9.49535	11.96	99.22	9.95963	11.31	102.33	8.44148	11.18
2014-01-04	14:00:00	2014-01-04 14:00:00	104.3	2.98473	12.59	100.223	7.88144	12.26	137.136	6.45185	12.5	118.245	9.52383	11.99	103.62	9.99602	11.3	107.93	8.58517	11.09
2014-01-04	14:15:00	2014-01-04 14:15:00	107.9	3.60738	12.43	107.723	9.63781	11.94	144.436	6.95019	12.36	122.945	9.73634	11.96	111.22	10.0844	11.24	114.93	8.88345	11.18
2014-01-04	14:30:00	2014-01-04 14:30:00	114.4	4.26555	12.22	114.423	9.74153	11.79	151.036	7.43875	12.19	128.345	9.84794	11.88	116.42	10.9693	11.4	120.43	9.16962	11.35
2014-01-04	14:45:00	2014-01-04 14:45:00	117.1	4.89278	12.01	115.423	10.2927	11.74	151.436	7.78458	12.16	130.145	9.95703	11.83	119.52	11.389	11.57	124.03	9.43323	11.46
2014-01-04	15:00:00	2014-01-04 15:00:00	119.2	5.51419	11.83	116.223	11.0741	11.73	153.036	8.27237	12.06	131.645	10.3735	11.78	121.22	11.7652	11.65	123.33	9.66633	11.49
2014-01-04	15:15:00	2014-01-04 15:15:00	119.5	6.10884	11.8	120.023	11.242	11.71	156.436	8.16235	12.3	135.245	10.9667	11.72	126.22	12.137	11.66	129.13	9.88689	11.53
2014-01-04	15:30:00	2014-01-04 15:30:00	123.5	6.6453	11.82	121.023	11.1947	11.71	157.236	9.15155	11.9	136.145	11.2971	11.63	126.82	12.4013	11.65	130.83	10.0714	11.57
2014-01-04	15:45:00	2014-01-04 15:45:00	124.6	7.12455	11.85	122.923	11.179	11.73	157.236	9.05352	12.1	135.045	11.3207	11.59	125.42	12.4939	11.66	128.43	10.2458	11.59
2014-01-04	16:00:00	2014-01-04 16:00:00	119.2	7.54541	11.95	118.623	11.1475	11.78	154.836	8.80366	12.28	133.145	11.3733	11.49	120.52	12.621	11.68	125.43	10.3839	11.62
2014-01-04	16:15:00	2014-01-04 16:15:00	121	7.97073	12.06	119.623	11.158	11.8	155.936	9.0561	12.16	132.445	11.4547	11.43	121.82	12.6157	11.73	123.43	10.5196	11.64
2014-01-04	16:30:00	2014-01-04 16:30:00	123.8	8.33383	12.15	122.523	11.1187	11.89	157.936	9.92585	11.61	137.245	12.0077	11.39	126.02	12.6025	11.76	129.13	10.6188	11.65
2014-01-04	16:45:00	2014-01-04 16:45:00	123.7	8.61856	12.16	121.723	11.2184	11.98	158.636	9.70003	11.95	136.845	12.2004	11.39	125.82	12.5786	11.77	127.93	10.7338	11.62
2014-01-04	17:00:00	2014-01-04 17:00:00	123.1	8.92723	12.2	120.323	10.8463	12.1	158.336	10.2302	11.67	137.245	12.2004	11.4	124.42	12.5627	11.77	128.63	10.8306	11.61
2014-01-04	17:15:00	2014-01-04 17:15:00	120.5	9.19544	12.24	117.823	12.6475	12.13	158.336	10.1157	11.8	136.745	12.3114	11.42	125.22	12.5495	11.77	126.93	10.9431	11.6
2014-01-04	17:30:00	2014-01-04 17:30:00	120.3	9.43582	12.27	118.323	12.4886	12.13	156.436	10.2432	11.75	135.245	12.4066	11.43	125.42	12.5363	11.78	128.13	11.0348	11.57
2014-01-04	17:45:00	2014-01-04 17:45:00	114.2	9.65336	12.27	112.623	12.5972	12.13	150.936	10.3474	11.71	130.045	12.8702	11.41	119.52	12.5257	11.79	118.93	11.1318	11.56
2014-01-04	18:00:00	2014-01-04 18:00:00	107.7	9.82717	12.33	106.223	8.15723	13.06	143.336	10.4596	11.72	122.245	12.5654	11.41	112.42	12.4807	11.82	113.43	11.158	11.79
2014-01-04	18:15:00	2014-01-04 18:15:00	104.9	9.93365	12.43	103.923	8.58004	13.01	140.236	10.1963	11.83	118.245	12.7456	11.41	105.92	12.4119	11.84	109.83	11.1659	11.79
2014-01-04	18:30:00	2014-01-04 18:30:00	100.9	9.96743	12.57	99.3231	10.2693	12.99	136.536	9.73116	11.88	114.845	12.6925	11.46	105.22	12.322	11.78	107.33	11.1187	11.71
2014-01-04	18:45:00	2014-01-04 18:45:00	97.7	9.90247	12.74	95.1231	9.57822	13.05	134.336	9.10253	11.88	112.445	12.2083	11.56	101.12	12.2242	11.73	104.73	11.0558	11.61
2014-01-04	19:00:00	2014-01-04 19:00:00	95.4	9.79342	12.87	93.0231	8.77021	13.22	130.736	8.32615	11.98	107.445	12.2559	11.59	98.12	12.1106	11.68	99.03	10.9405	11.56
2014-01-04	19:15:00	2014-01-04 19:15:00	90	9.65855	12.96	86.7231	6.81651	13.47	126.436	7.65475	12.29	102.245	11.7652	11.65	93.72	11.9576	11.65	94.63	10.6606	11.67
2014-01-04	19:30:00	2014-01-04 19:30:00	82.3	9.441	13.15	79.1231	6.15632	13.76	118.536	7.02848	12.69	93.5455	11.6651	11.67	84.32	11.6809	11.66	85.43	10.3709	11.78
2014-01-04	19:45:00	2014-01-04 19:45:00	76	8.46712	14	73.3231	6.13882	14.02	113.036	6.69058	12.87	89.1455	10.7181	11.82	78.52	11.2971	11.76	79.33	10.0584	12.11
2014-01-04	20:00:00	2014-01-04 20:00:00	71.9	7.99881	14.09	70.5231	5.77483	14.17	107.936	6.52968	12.98	84.7455	10.6632	11.93	76.42	10.7678	12.06	77.03	9.75191	12.44
2014-01-04	20:15:00	2014-01-04 20:15:00	69.1	7.53017	14.15	67.7231	4.72615	14.26	104.936	6.44182	13.08	83.2455	9.96743	12.15	73.12	10.5144	12.29	74.53	9.53936	12.46
2014-01-04	20:30:00	2014-01-04 20:30:00	65.4	7.08662	14.23	62.9231	4.58928	14.31	101.236	6.24887	13.24	78.0455	8.01158	12.45	69.52	10.1547	12.57	69.43	9.26001	12.78
2014-01-04	20:45:00	2014-01-04 20:45:00	60.4	6.46691	14.47	56.0231	4.04276	14.41	96.2364	5.95411	13.41	71.5455	7.96052	12.51	62.82	9.85832	12.8	63.53	8.99164	12.99
2014-01-04	21:00:00	2014-01-04 21:00:00	57.4	5.75246	14.77	52.7231	3.7897	14.47	92.3364	5.62578	13.55	69.1455	7.6522	12.56	60.12	9.50052	13.04	61.03	8.75221	13.09
2014-01-04	21:15:00	2014-01-04 21:15:00	54.1	5.11895	14.96	50.3231	3.36623	14.58	88.9364	5.32369	13.65	65.2455	7.35756	12.68	56.92	9.36081	13.17	56.93	8.54666	13.16
2014-01-04	21:30:00	2014-01-04 21:30:00	51.1	4.59661	15.09	47.3231	2.44894	14.69	85.8364	5.09186	13.71	63.0455	7.02091	12.78	55.02	8.9968	13.24	55.53	8.35689	13.17
2014-01-04	21:45:00	2014-01-04 21:45:00	50.2	4.12256	15.19	47.5231	2.1144	14.85	85.4364	4.93451	13.72	63.2455	6.85432	12.89	53.12	8.63397	13.33	54.83	8.19048	13.17
2014-01-04	22:00:00	2014-01-04 22:00:00	50	3.65289	15.28	47.8231	1.90658	14.93	84.6364	4.85353	13.69	63.2455	6.92748	12.87	52.52	8.34408	13.42	55.53	8.04478	13.18
2014-01-04	22:15:00	2014-01-04 22:15:00	51.8	3.21651	15.34	49.8231	1.6623	14.97	86.2364	4.78736	13.69	66.0455	12.248	12.18	54.62	8.07799	13.5	57.73	8.82681	12.34
2014-01-04	22:30:00	2014-01-04 22:30:00	53.9	2.83414	15.38	52.4231	1.38983	14.98	88.7364	4.70658	13.7	67.8455	13.8761	11.77	57.12	7.82535	13.56	59.43	9.43323	11.66
2014-01-04	22:45:00	2014-01-04 22:45:00	57.7	2.58848	15.31	55.7231	1.37654	14.97	91.8364	4.60393	13.78	72.3455	14.1834	11.62	61.52	9.02258	13.47	63.13	10.0116	11.53
2014-01-04	23:00:00	2014-01-04 23:00:00	62.2	2.53957	15.19	60.3231	14.6761	12.35	96.9364	7.93501	13.04	76.3455	14.3305	11.54	63.82	12.4463	12.82	67.13	10.5222	11.54
2014-01-04	23:15:00	2014-01-04 23:15:00	64.7	4.0766	13.47	62.6231	15.0438	12.21	99.3364	9.47982	12.53	77.6455	14.4242	11.48	67.52	12.8384	12.51	70.13	10.9746	11.51
2014-01-04	23:30:00	2014-01-04 23:30:00	73	5.44486	12.77	72.5231	15.2884	12.02	105.636	10.1963	12.33	85.4455	14.4858	11.41	73.82	13.258	12.26	76.93	11.3733	11.47
2014-01-04	23:45:00	2014-01-04 23:45:00	81.9	6.58244	12.59	80.0231	15.4257	11.9	113.536	10.6136	12.22	93.5455	14.4965	11.4	80.92	13.2819	12.16	85.03	11.7941	11.4
2014-01-05	00:00:00	2014-01-05	85.3	7.53525	12.48	84.5231	16.2999	11.87	119.936	10.8646	12.22	99.8455	15.2212	11.37	87.02	13.5988	12.04	90.73	12.2427	11.4
2014-01-05	00:15:00	2014-01-05 00:15:00	91.4	8.26981	12.48	89.1231	17.034	11.88	125.936	11.0348	12.23	105.245	15.8596	11.36	95.12	14.8746	11.88	98.23	12.7005	11.44
2014-01-05	00:30:00	2014-01-05 00:30:00	99.5	8.9092	12.49	97.3231	17.0313	11.9	134.536	11.2079	12.22	113.745	16.0891	11.36	101.92	16.0296	11.75	104.03	13.1464	11.44
2014-01-05	00:45:00	2014-01-05 00:45:00	108.3	9.49017	12.46	104.123	16.7953	11.95	140.836	11.5862	12.16	121.145	16.6517	11.37	107.62	16.8306	11.62	110.33	13.5188	11.44
2014-01-05	01:00:00	2014-01-05 01:00:00	110.1	10.061	12.34	108.723	17.417	11.99	146.536	11.8258	12.06	124.545	16.7601	11.37	112.42	17.5312	11.54	115.83	13.8788	11.46
2014-01-05	01:15:00	2014-01-05 01:15:00	114	10.9039	12.05	115.223	18.1141	11.86	150.736	12.3616	11.89	128.745	16.6138	11.38	119.32	17.6319	11.51	121.93	14.1994	11.5
2014-01-05	01:30:00	2014-01-05 01:30:00	123	11.7494	11.87	117.923	18.5481	11.77	155.436	12.6395	11.83	134.545	16.6924	11.38	122.12	17.8306	11.5	125.93	14.5206	11.53
2014-01-05	01:45:00	2014-01-05 01:45:00	125.8	12.5336	11.8	123.923	18.8571	11.74	161.436	13.0879	11.78	138.245	16.8116	11.38	129.22	18.0268	11.51	131.53	14.8048	11.55
2014-01-05	02:00:00	2014-01-05 02:00:00	132.3	13.165	11.79	129.723	18.9912	11.69	167.436	13.399	11.7	147.745	17.186	11.39	136.82	18.4197	11.54	138.83	15.0814	11.55
2014-01-05	02:15:00	2014-01-05 02:15:00	133.4	13.6761	11.77	133.023	19.1747	11.66	171.036	14.2743	11.52	148.545	17.3137	11.43	137.02	18.4361	11.54	141.23	15.3422	11.54
2014-01-05	02:30:00	2014-01-05 02:30:00	140.3	14.1967	11.71	135.023	19.3474	11.62	176.536	14.368	11.46	154.245	17.436	11.46	143.42	19.405	11.53	143.43	15.5442	11.55
2014-01-05	02:45:00	2014-01-05 02:45:00	142.7	14.6627	11.67	137.923	19.479	11.59	177.236	14.9551	11.46	155.145	17.5339	11.48	147.12	18.5809	11.52	148.63	15.7409	11.56
2014-01-05	03:00:00	2014-01-05 03:00:00	144.8	15.0948	11.64	141.923	19.6629	11.58	177.736	14.727	11.42	158.645	17.621	11.5	146.42	18.6575	11.52	151.13	15.9163	11.57
2014-01-05	03:15:00	2014-01-05 03:15:00	145.2	15.4526	11.6	141.723	19.7315	11.56	181.436	15.1405	11.41	161.145	17.6645	11.51	147.42	18.6684	11.53	148.63	16.0837	11.58
2014-01-05	03:30:00	2014-01-05 03:30:00	140	15.7571	11.58	140.223	19.7782	11.53	178.936	15.0868	11.39	156.045	17.5584	11.48	144.52	18.6711	11.53	151.13	16.2323	11.58
2014-01-05	03:45:00	2014-01-05 03:45:00	143.9	16.0432	11.57	137.923	19.7618	11.52	177.036	15.2561	11.44	155.645	17.4224	11.45	144.82	18.6821	11.54	147.23	16.3648	11.59
2014-01-05	04:00:00	2014-01-05 04:00:00	148.7	16.3026	11.57	146.123	19.7178	11.52	180.436	15.4041	11.48	157.845	17.2784	11.45	148.32	18.7121	11.56	151.83	16.4676	11.58
2014-01-05	04:15:00	2014-01-05 04:15:00	143.7	16.4974	11.58	139.323	19.5174	11.53	176.736	15.5522	11.51	153.345	17.2702	11.46	143.72	18.6657	11.56	147.13	16.5624	11.61
2014-01-05	04:30:00	2014-01-05 04:30:00	141.2	16.6517	11.59	136.823	19.5613	11.54	172.836	15.6951	11.52	152.445	17.1127	11.44	140.82	18.6875	11.56	145.63	16.6273	11.53
2014-01-05	04:45:00	2014-01-05 04:45:00	135.3	16.7628	11.62	137.123	19.2871	11.56	170.336	15.8137	11.54	147.645	17.0584	11.45	136.12	18.6793	11.56	144.43	16.6517	11.5
2014-01-05	05:00:00	2014-01-05 05:00:00	130.8	16.9146	11.63	127.523	19.5586	11.56	166.336	15.892	11.54	145.745	17.0639	11.47	134.62	18.7121	11.58	137.73	16.6734	11.44
2014-01-05	05:15:00	2014-01-05 05:15:00	129.3	17.0096	11.66	126.223	19.3117	11.56	164.336	15.9487	11.54	141.345	17.0612	11.48	133.12	18.6657	11.57	134.63	16.7005	11.42
2014-01-05	05:30:00	2014-01-05 05:30:00	126	17.1399	11.67	125.823	19.5449	11.63	160.836	15.9621	11.54	139.045	17.053	11.49	129.22	18.5345	11.49	132.23	16.7167	11.42
2014-01-05	05:45:00	2014-01-05 05:45:00	119	17.2567	11.68	118.323	19.3913	11.65	156.436	15.9729	11.57	133.445	17.1806	11.5	124.42	18.4552	11.48	126.93	16.7195	11.46
2014-01-05	06:00:00	2014-01-05 06:00:00	114.5	17.3382	11.71	113.323	19.3885	11.69	150.736	16.0296	11.6	126.745	17.1589	11.49	117.22	18.488	11.55	117.83	16.7547	11.53
2014-01-05	06:15:00	2014-01-05 06:15:00	111.5	17.4061	11.72	107.723	18.6684	11.86	144.836	16.0459	11.59	121.745	17.1182	11.49	113.72	18.4908	11.59	115.13	16.8252	11.66
2014-01-05	06:30:00	2014-01-05 06:30:00	103.8	17.4578	11.75	99.2231	17.3273	12.16	138.936	15.275	11.58	115.745	17.1317	11.51	104.62	18.4853	11.62	107.93	16.8414	11.68
2014-01-05	06:45:00	2014-01-05 06:45:00	97.1	17.1263	11.92	95.5231	15.5522	12.34	133.136	12.8596	11.73	110.845	17.1833	11.54	99.22	18.4744	11.63	101.43	16.1755	11.78
2014-01-05	07:00:00	2014-01-05 07:00:00	90.9	15.892	12.62	88.4231	14.7538	12.44	127.436	11.7836	11.92	103.345	17.0177	11.59	93.22	18.4744	11.63	93.93	15.8029	11.85
2014-01-05	07:15:00	2014-01-05 07:15:00	83	14.9632	12.9	79.5231	13.6041	12.68	119.936	11.2131	12.07	96.5455	16.9011	11.61	86.32	18.4443	11.64	87.43	15.4418	11.88
2014-01-05	07:30:00	2014-01-05 07:30:00	77.3	13.7321	13.25	73.7231	12.4542	12.88	114.036	10.7234	12.19	88.7455	13.6601	11.79	80.12	18.3569	11.65	79.73	15.0438	11.89
2014-01-05	07:45:00	2014-01-05 07:45:00	71.3	12.5786	13.54	68.7231	11.0401	13.24	108.236	10.3318	12.28	83.9455	13.2899	11.87	75.42	18.1468	11.68	74.53	14.5581	12.14
2014-01-05	08:00:00	2014-01-05 08:00:00	66.1	11.5441	13.71	62.9231	10.1	13.45	102.736	9.82197	12.4	77.6455	12.4066	11.96	69.52	17.4061	11.84	69.23	14.023	12.42
2014-01-05	08:15:00	2014-01-05 08:15:00	60.6	10.4491	13.87	56.4231	8.39789	13.53	97.5364	9.19544	12.54	71.0455	11.1947	12.07	64.92	16.1701	12.12	62.93	13.4283	12.64
2014-01-05	08:30:00	2014-01-05 08:30:00	54.9	9.31686	14.1	50.2231	6.60758	13.71	91.8364	8.44148	12.71	65.4455	10.8725	12.14	59.02	14.982	12.48	57.03	12.8888	12.8
2014-01-05	08:45:00	2014-01-05 08:45:00	51.1	8.20327	14.36	46.3231	5.90925	13.92	87.3364	8.00392	12.8	61.7455	10.4465	12.22	55.42	14.3385	12.74	53.03	12.396	12.88
2014-01-05	09:00:00	2014-01-05 09:00:00	47.9	7.15491	14.58	43.6231	4.74083	14.18	83.2364	7.65983	12.92	58.4455	10.0844	12.31	51.32	13.6947	12.94	50.13	11.9497	12.92
2014-01-05	09:15:00	2014-01-05 09:15:00	44.5	6.21634	14.78	39.6231	2.29387	14.46	79.6364	7.3322	13	54.3455	9.71819	12.41	47.52	13.1889	13.09	46.13	11.5599	12.94
2014-01-05	09:30:00	2014-01-05 09:30:00	41.5	5.41764	14.95	36.9231	1.40758	14.83	76.7364	7.0487	13.21	52.1455	9.03289	12.67	44.72	12.7933	13.21	44.03	11.1843	13.05
2014-01-05	09:45:00	2014-01-05 09:45:00	39.1	4.68946	15.12	34.5231	0.924856	15.08	73.6364	5.92669	13.81	49.2455	7.7642	13.08	41.62	12.4198	13.33	40.73	10.8254	13.19
2014-01-05	10:00:00	2014-01-05 10:00:00	36	4.0331	15.28	31.3231	0.628895	15.31	70.8364	4.90014	14.25	46.2455	7.31953	13.25	39.02	12.1344	13.45	38.33	10.4309	13.46
2014-01-05	10:15:00	2014-01-05 10:15:00	34.8	3.50216	15.44	31.5231	0.448261	15.51	69.2364	3.89559	14.63	46.0455	7.14226	13.34	36.92	11.9286	13.56	37.63	10.0792	13.57
2014-01-05	10:30:00	2014-01-05 10:30:00	34.8	3.05789	15.58	32.7231	0.369942	15.69	68.6364	3.25448	14.92	47.3455	6.96029	13.47	36.52	11.6072	13.82	39.83	9.76229	13.64
2014-01-05	10:45:00	2014-01-05 10:45:00	35.3	2.68887	15.7	33.2231	0.359992	15.84	69.0364	2.86467	15.14	49.3455	7.02091	13.37	37.32	11.1423	14.26	41.03	9.53418	13.61
2014-01-05	11:00:00	2014-01-05 11:00:00	40.4	2.39793	15.79	39.2231	0.356018	15.94	72.6364	2.61413	15.32	54.7455	13.8975	12.74	40.12	10.8594	14.53	46.73	9.37374	13.32
2014-01-05	11:15:00	2014-01-05 11:15:00	43.7	2.15342	15.95	42.2231	0.36795	16.07	76.7364	2.39561	15.47	58.4455	16.6084	12.49	44.32	10.8698	14.54	49.13	10.7234	12.76
2014-01-05	11:30:00	2014-01-05 11:30:00	49.3	1.9521	16.25	47.8231	0.365959	16.18	83.2364	7.1119	13.93	65.2455	17.0313	12.37	51.02	10.8882	14.49	56.23	11.5704	12.34
2014-01-05	11:45:00	2014-01-05 11:45:00	56.5	2.02055	16.21	55.4231	18.6192	13.39	89.6364	10.2979	13.38	71.3455	17.1697	12.24	57.92	10.8986	14.49	62.73	12.4357	12.12
2014-01-05	12:00:00	2014-01-05 12:00:00	62.8	3.41626	15.12	61.7231	19.1994	13.21	97.8364	12.6316	12.91	78.0455	17.5475	12.17	66.82	12.396	14.35	69.43	13.2261	12.04
2014-01-05	12:15:00	2014-01-05 12:15:00	67.4	4.90014	14.37	66.0231	19.8936	13.09	102.236	14.1967	12.65	82.8455	18.0432	12.13	68.92	13.6521	13.96	73.63	13.9456	12.07
2014-01-05	12:30:00	2014-01-05 12:30:00	73.1	6.30144	14.12	72.5231	20.0778	13.07	108.636	14.9686	12.54	88.7455	18.0241	12.13	75.82	16.4784	13.56	79.43	14.6466	12.1
2014-01-05	12:45:00	2014-01-05 12:45:00	82.8	7.63948	14.19	82.2231	19.9513	13.05	118.136	15.7787	12.44	97.0455	18.3842	12.14	85.32	18.286	13.08	89.03	15.2938	12.12
2014-01-05	13:00:00	2014-01-05 13:00:00	89.8	8.96587	13.8	87.7231	20.0256	12.99	125.836	16.1701	12.42	102.845	19.4735	12.14	94.32	19.2843	12.74	94.43	15.8893	12.15
2014-01-05	13:15:00	2014-01-05 13:15:00	98.5	10.1287	13.53	95.6231	19.9403	12.95	132.736	16.4866	12.4	112.045	19.4735	12.15	101.12	20.5926	12.51	103.83	16.446	12.18
2014-01-05	13:30:00	2014-01-05 13:30:00	103.1	11.1292	13.21	99.7231	19.9458	12.73	137.336	16.7601	12.39	116.945	19.8387	12.15	107.62	21.3266	12.42	109.13	16.9608	12.19
2014-01-05	13:45:00	2014-01-05 13:45:00	105.6	12.0341	12.88	106.023	20.3172	12.49	143.236	16.9201	12.43	122.045	19.6354	12.15	108.02	21.6363	12.4	113.13	17.4252	12.19
2014-01-05	14:00:00	2014-01-05 14:00:00	110.8	12.841	12.73	111.323	20.419	12.44	149.036	17.0747	12.45	126.745	19.3474	12.18	116.32	21.9768	12.37	120.53	17.8333	12.19
2014-01-05	14:15:00	2014-01-05 14:15:00	117.2	13.5375	12.64	117.623	20.5816	12.43	157.336	17.2947	12.46	131.545	17.7353	12.34	122.02	22.401	12.33	124.73	18.2014	12.2
2014-01-05	14:30:00	2014-01-05 14:30:00	126.4	14.0711	12.62	124.323	20.5705	12.41	161.436	17.5775	12.48	140.045	16.6544	12.47	130.02	22.6952	12.31	133.83	18.5345	12.21
2014-01-05	14:45:00	2014-01-05 14:45:00	131.4	14.3278	12.7	131.323	20.5375	12.4	168.436	17.8824	12.47	149.345	16.1485	12.45	137.82	22.723	12.29	140.53	18.8243	12.22
2014-01-05	15:00:00	2014-01-05 15:00:00	142	14.3599	12.78	137.423	20.6532	12.4	178.336	18.5427	12.38	155.645	16.2404	12.42	142.22	22.6036	12.3	145.13	19.0679	12.23
2014-01-05	15:15:00	2014-01-05 15:15:00	144.5	14.5072	12.74	141.423	20.78	12.38	179.336	18.6547	12.38	159.845	16.381	12.36	147.22	22.4565	12.3	151.13	19.3063	12.24
2014-01-05	15:30:00	2014-01-05 15:30:00	151.7	14.7833	12.62	149.023	20.9373	12.35	184.536	18.8106	12.39	165.245	16.7872	12.3	149.12	22.1653	12.23	154.53	19.5092	12.23
2014-01-05	15:45:00	2014-01-05 15:45:00	151.1	15.0814	12.56	149.723	20.8849	12.34	188.736	18.92	12.4	163.445	18.7832	12.23	153.82	21.8716	12.24	158.33	19.6821	12.24
2014-01-05	16:00:00	2014-01-05 16:00:00	150.4	15.4984	12.46	148.423	21.1664	12.34	187.536	18.8161	12.42	166.245	18.4197	12.2	153.82	21.7138	12.29	156.43	19.8167	12.22
2014-01-05	16:15:00	2014-01-05 16:15:00	151.9	15.9594	12.38	151.123	21.4151	12.31	188.736	17.8333	12.22	163.345	18.7942	12.18	154.32	21.7636	12.32	160.13	19.9074	12.22
2014-01-05	16:30:00	2014-01-05 16:30:00	155.2	16.4514	12.33	154.623	21.393	12.3	191.736	17.7217	12.14	167.645	19.4351	12.18	158.12	22.1459	12.34	159.33	19.9898	12.23
2014-01-05	16:45:00	2014-01-05 16:45:00	153.4	16.9363	12.3	154.223	21.5893	12.28	190.136	17.9342	12.16	166.545	20.1218	12.22	156.32	22.096	12.29	161.13	20.1136	12.27
2014-01-05	17:00:00	2014-01-05 17:00:00	154.9	17.3844	12.28	151.823	21.7747	12.26	191.436	18.0923	12.21	170.945	20.0173	12.26	157.32	22.0516	12.26	162.93	20.2043	12.28
2014-01-05	17:15:00	2014-01-05 17:15:00	151.6	17.8143	12.27	155.423	22.2346	12.23	190.136	18.6739	12.36	171.145	20.4659	12.27	158.72	21.9602	12.25	160.93	20.2731	12.27
2014-01-05	17:30:00	2014-01-05 17:30:00	155.6	18.1932	12.26	153.723	22.5786	12.24	191.136	18.9009	12.41	164.145	20.5926	12.3	160.52	22.0378	12.26	158.13	20.3309	12.25
2014-01-05	17:45:00	2014-01-05 17:45:00	157	18.5673	12.26	149.323	22.8397	12.23	187.836	19.0076	12.43	162.045	20.5705	12.31	153.92	22.1819	12.34	156.43	20.3695	12.21
2014-01-05	18:00:00	2014-01-05 18:00:00	146.6	18.9447	12.25	145.623	22.8981	12.23	184.036	19.1008	12.43	160.945	20.5705	12.33	150.12	22.3205	12.41	154.93	20.3943	12.2
2014-01-05	18:15:00	2014-01-05 18:15:00	145.5	19.2624	12.25	141.223	23.0899	12.23	179.636	19.1199	12.45	158.745	20.6505	12.35	148.32	22.3649	12.44	149.63	20.397	12.23
2014-01-05	18:30:00	2014-01-05 18:30:00	141.3	19.5613	12.25	137.623	22.9425	12.24	176.336	19.1583	12.45	153.045	20.6946	12.36	145.42	22.4149	12.45	145.33	20.4245	12.25
2014-01-05	18:45:00	2014-01-05 18:45:00	133.2	19.8194	12.26	132.823	22.5009	12.27	171.836	19.246	12.47	146.545	20.7001	12.36	135.72	22.426	12.45	138.53	20.4301	12.26
2014-01-05	19:00:00	2014-01-05 19:00:00	127.3	20.0558	12.27	125.823	20.8021	12.42	163.636	19.2679	12.49	142.645	20.3419	12.4	131.32	22.4093	12.45	135.13	20.4163	12.28
2014-01-05	19:15:00	2014-01-05 19:15:00	124.9	20.1988	12.31	122.123	21.6474	12.48	157.936	19.2816	12.48	136.945	20.2153	12.4	123.32	22.4149	12.45	129.13	20.4383	12.28
2014-01-05	19:30:00	2014-01-05 19:30:00	116.9	20.2676	12.37	115.423	21.8301	12.54	154.236	19.2377	12.44	132.345	20.2649	12.38	121.42	22.3927	12.44	123.03	20.4135	12.28
2014-01-05	19:45:00	2014-01-05 19:45:00	112.2	20.2236	12.45	112.823	20.9952	12.77	149.736	19.1994	12.43	126.345	20.1961	12.39	118.92	22.3732	12.45	118.23	20.3502	12.3
2014-01-05	20:00:00	2014-01-05 20:00:00	110.1	20.0531	12.61	108.323	20.9483	12.82	144.036	18.8708	12.39	123.445	20.0448	12.4	111.62	22.3732	12.46	114.13	20.2539	12.33
2014-01-05	20:15:00	2014-01-05 20:15:00	107.9	19.3035	13.29	103.623	20.1466	12.88	142.036	17.9614	12.43	117.845	19.7975	12.42	106.92	22.2152	12.46	111.13	20.1631	12.39
2014-01-05	20:30:00	2014-01-05 20:30:00	99.9	18.6821	13.68	99.5231	19.3117	13.06	136.736	16.0675	13.07	112.045	19.6794	12.45	103.72	22.2734	12.46	107.43	19.9403	12.68
2014-01-05	20:45:00	2014-01-05 20:45:00	96.2	18.0241	13.89	95.9231	17.8388	13.45	133.536	15.2804	13.36	109.145	19.3227	12.5	100.42	22.0322	12.43	101.53	19.5723	13.11
2014-01-05	21:00:00	2014-01-05 21:00:00	91.3	17.4469	13.99	88.4231	16.1809	13.93	127.436	14.888	13.53	103.745	18.7504	12.6	94.52	21.9076	12.45	97.03	19.1144	13.62
2014-01-05	21:15:00	2014-01-05 21:15:00	86.3	16.2972	14.67	83.9231	14.2128	14.51	122.536	14.1352	13.85	97.6455	18.1004	12.79	89.12	21.6668	12.55	90.73	18.5427	14.17
2014-01-05	21:30:00	2014-01-05 21:30:00	82.5	15.2777	15.08	80.8231	13.8201	14.74	118.036	13.0427	14.2	95.0455	16.0053	13.22	84.82	21.2216	12.82	84.83	17.8769	14.65
2014-01-05	21:45:00	2014-01-05 21:45:00	76.4	14.3091	15.31	73.7231	12.8516	14.99	113.236	12.2083	14.5	89.6455	14.4992	13.76	80.02	20.8766	13.01	79.43	17.2594	14.69
2014-01-05	22:00:00	2014-01-05 22:00:00	74	13.4043	15.45	72.3231	11.5388	15.18	109.936	11.0794	14.89	86.9455	13.431	13.92	78.12	20.3447	13.25	77.83	16.7384	14.79
2014-01-05	22:15:00	2014-01-05 22:15:00	74.9	12.6104	15.54	71.1231	10.1313	15.29	108.636	10.3813	15.1	86.9455	14.3359	13.77	75.92	19.5421	13.61	79.33	16.208	14.88
2014-01-05	22:30:00	2014-01-05 22:30:00	72.8	11.9075	15.6	70.9231	8.79079	15.38	107.936	9.8791	15.23	84.7455	17.3192	13.24	75.22	18.8544	14.01	78.23	15.6978	14.95
2014-01-05	22:45:00	2014-01-05 22:45:00	74.4	11.2682	15.66	73.5231	8.5287	15.44	109.236	9.49794	15.29	87.6455	18.5126	12.95	77.92	18.3788	14.31	78.93	16.1242	14.22
2014-01-05	23:00:00	2014-01-05 23:00:00	73.7	10.7155	15.71	73.5231	7.59625	15.46	109.936	9.31428	15.26	88.4455	19.035	12.77	76.22	17.5394	14.66	80.03	16.5299	13.29
2014-01-05	23:15:00	2014-01-05 23:15:00	80.5	10.2641	15.67	77.3231	14.4885	14.25	113.436	9.35564	15.16	92.4455	18.9118	12.73	82.72	16.7195	14.97	84.73	16.9445	12.79
2014-01-05	23:30:00	2014-01-05 23:30:00	83.6	10.1443	15.43	81.5231	18.5509	13.68	116.536	9.45393	15.03	94.1455	19.0651	12.67	84.82	17.4469	15.09	91.13	17.3708	12.63
2014-01-05	23:45:00	2014-01-05 23:45:00	85.5	10.1	15.17	85.0231	17.7625	13.74	120.336	12.3035	14.31	101.545	18.9748	12.61	89.72	18.9447	14.66	91.13	17.7598	12.59
2014-01-06	00:00:00	2014-01-06	93.1	10.0896	15.09	92.0231	19.5559	13.18	126.536	14.8531	13.64	106.745	19.8222	12.55	92.02	19.7315	14.1	98.73	18.0977	12.6
2014-01-06	00:15:00	2014-01-06 00:15:00	97.9	10.1339	14.97	94.7231	14.9739	13.82	133.136	15.7571	13.42	109.645	19.6876	12.53	100.82	20.5044	13.45	101.53	18.4443	12.53
2014-01-06	00:30:00	2014-01-06 00:30:00	101	10.1651	14.92	104.123	17.9205	13.72	139.136	16.5434	13.24	118.245	19.586	12.54	109.62	21.1195	13.08	111.03	18.7532	12.49
2014-01-06	00:45:00	2014-01-06 00:45:00	116.2	10.2771	14.73	105.923	17.5258	13.52	146.036	16.7655	13.18	120.645	19.8139	12.52	114.72	21.241	12.88	113.03	19.035	12.49
2014-01-06	01:00:00	2014-01-06 01:00:00	115.7	10.517	14.57	111.323	15.3772	13.81	152.836	17.091	13.13	129.245	19.4461	12.62	121.62	21.5229	12.76	122.83	19.2843	12.48
2014-01-06	01:15:00	2014-01-06 01:15:00	122.5	10.7103	14.45	118.323	13.0082	14.23	157.536	17.6673	13	135.945	19.8249	12.57	119.52	21.664	12.7	126.23	19.5202	12.49
2014-01-06	01:30:00	2014-01-06 01:30:00	124.1	10.9484	14.31	126.223	13.5455	14.16	162.336	18.0077	12.87	141.545	20.0091	12.55	129.82	21.3736	12.69	132.43	19.7315	12.48
2014-01-06	01:45:00	2014-01-06 01:45:00	128.2	11.1895	14.22	128.423	13.7027	14.13	163.236	18.3487	12.76	141.345	20.1411	12.55	132.72	21.6889	12.71	135.43	19.9239	12.49
2014-01-06	02:00:00	2014-01-06 02:00:00	133.6	11.4258	14.21	131.223	13.7694	14.13	168.936	18.6657	12.7	151.345	20.1988	12.55	137.12	21.3598	12.84	141.43	20.0641	12.5
2014-01-06	02:15:00	2014-01-06 02:15:00	133.6	11.5757	14.31	135.523	13.2234	14.27	176.936	18.8407	12.69	147.245	20.2566	12.55	144.82	21.3128	12.91	138.73	20.0421	12.75
2014-01-06	02:30:00	2014-01-06 02:30:00	145.4	11.6783	14.39	136.623	13.1357	14.31	182.236	18.9666	12.67	152.045	20.2098	12.58	147.42	20.8242	12.97	150.03	19.9184	12.97
2014-01-06	02:45:00	2014-01-06 02:45:00	141.4	11.7652	14.42	146.923	13.1889	14.33	180.036	19.046	12.65	161.345	14.526	13.44	155.32	20.3777	13.05	146.53	19.792	13.04
2014-01-06	03:00:00	2014-01-06 03:00:00	152.1	11.8337	14.37	149.623	13.5268	14.26	185.736	19.1555	12.64	166.945	13.6734	13.63	149.32	20.6863	13.1	160.43	19.586	13.11
2014-01-06	03:15:00	2014-01-06 03:15:00	150.3	11.947	14.31	151.023	18.0923	13.73	191.536	19.1583	12.67	165.545	17.4116	13.11	155.02	19.9651	13.17	156.23	19.3501	13.12
2014-01-06	03:30:00	2014-01-06 03:30:00	154.9	12.0895	14.26	155.123	19.8964	13.4	191.036	19.1008	12.73	169.845	15.1136	13.28	155.42	20.1576	13.15	152.53	19.1638	13.07
2014-01-06	03:45:00	2014-01-06 03:45:00	151.5	12.2717	14.19	146.423	20.656	13.27	191.136	19.1008	12.72	163.445	18.9584	12.88	160.92	20.2896	13.04	156.73	19.0076	12.99
2014-01-06	04:00:00	2014-01-06 04:00:00	156.7	12.5813	14.02	151.523	21.2576	13.13	198.436	19.0159	12.75	172.045	20.1438	12.67	160.42	19.8964	13.01	165.03	18.8681	12.91
2014-01-06	04:15:00	2014-01-06 04:15:00	158.7	13.0029	13.83	155.323	21.3626	13.12	196.536	19.0159	12.74	167.445	20.4163	12.61	156.92	19.6931	13.01	165.03	18.8051	12.8
2014-01-06	04:30:00	2014-01-06 04:30:00	155.6	13.5881	13.6	155.023	21.5755	13.13	194.836	18.9775	12.75	163.345	20.0201	12.69	161.32	19.6904	12.99	163.43	18.7668	12.77
2014-01-06	04:45:00	2014-01-06 04:45:00	152.2	14.4055	13.3	151.823	21.8937	13.03	189.436	18.9419	12.79	171.345	19.9843	12.74	155.02	19.9293	12.96	157.03	18.7313	12.75
2014-01-06	05:00:00	2014-01-06 05:00:00	146	15.1244	13.21	154.323	21.4317	13.13	187.436	18.9337	12.79	162.045	20.1191	12.75	158.52	19.9981	12.89	156.63	18.7368	12.74
2014-01-06	05:15:00	2014-01-06 05:15:00	150.4	15.722	13.17	150.523	19.479	13.19	187.136	18.8434	12.82	167.645	18.8325	12.87	156.32	19.9953	12.85	161.43	18.7395	12.74
2014-01-06	05:30:00	2014-01-06 05:30:00	153.1	16.2188	13.18	146.623	19.8854	13.19	186.236	18.8325	12.82	155.645	18.5618	12.92	144.12	20.0311	12.81	152.53	18.7203	12.76
2014-01-06	05:45:00	2014-01-06 05:45:00	151.4	16.6165	13.2	142.723	18.8681	13.33	184.936	18.7969	12.87	161.445	18.6055	12.93	150.62	20.0366	12.81	150.13	18.7258	12.78
2014-01-06	06:00:00	2014-01-06 06:00:00	146.4	16.9146	13.23	138.823	18.879	13.37	178.036	18.8106	12.85	158.345	16.7384	13.11	144.12	19.9074	12.83	152.33	18.7231	12.79
2014-01-06	06:15:00	2014-01-06 06:15:00	135	17.1399	13.34	133.923	17.5095	13.53	173.336	18.8544	12.83	156.245	16.6544	13.12	137.42	19.7508	12.86	141.63	18.693	12.82
2014-01-06	06:30:00	2014-01-06 06:30:00	131.8	17.0584	13.54	125.323	15.9513	13.79	165.936	18.9009	12.83	144.645	16.5786	13.14	136.32	19.7755	12.91	137.03	18.6274	12.88
2014-01-06	06:45:00	2014-01-06 06:45:00	121.9	16.9825	13.66	125.323	15.6789	13.89	161.636	18.6192	12.92	138.545	16.5867	13.14	131.72	19.7618	12.94	128.63	18.5618	12.95
2014-01-06	07:00:00	2014-01-06 07:00:00	126.5	16.7818	13.84	119.523	15.4122	13.98	159.236	18.5481	12.95	138.345	15.6843	13.25	125.02	19.6245	12.99	127.13	18.4716	13.03
2014-01-06	07:15:00	2014-01-06 07:15:00	119	16.446	14.04	110.623	14.1941	14.19	153.436	18.4662	12.97	132.045	15.0626	13.38	120.72	19.3995	13.11	120.73	18.3979	13.1
2014-01-06	07:30:00	2014-01-06 07:30:00	109.9	15.892	14.33	104.523	13.391	14.32	148.136	17.7135	13.09	128.045	14.727	13.46	111.12	19.4022	13.2	119.83	18.2559	13.31
2014-01-06	07:45:00	2014-01-06 07:45:00	105.8	15.5172	14.37	103.323	13.2128	14.36	143.236	16.208	13.34	118.745	14.5072	13.52	111.12	19.1994	13.26	111.53	18.0841	13.43
2014-01-06	08:00:00	2014-01-06 08:00:00	99.7	15.0895	14.45	101.723	12.788	14.43	141.136	15.1701	13.62	117.945	14.6144	13.48	107.12	18.9803	13.32	105.83	17.8606	13.61
2014-01-06	08:15:00	2014-01-06 08:15:00	103.8	14.601	14.57	97.1231	11.9048	14.57	136.936	14.5447	13.75	115.945	14.3278	13.54	100.82	18.387	13.45	107.23	17.5149	13.98
2014-01-06	08:30:00	2014-01-06 08:30:00	97.3	13.9456	14.79	101.123	10.1937	14.81	134.036	13.5508	14.02	109.545	12.9206	14	101.42	18.1168	13.62	104.53	17.205	14.11
2014-01-06	08:45:00	2014-01-06 08:45:00	97.9	13.4922	14.94	93.9231	9.1593	14.96	137.936	12.6634	14.26	111.345	12.1449	14.26	101.02	17.3898	13.96	100.23	16.8143	14.28
2014-01-06	09:00:00	2014-01-06 09:00:00	92.2	12.666	15.09	93.7231	8.40558	15.06	132.536	12.2955	14.29	109.545	11.8785	14.31	102.92	16.996	14.11	98.63	16.5055	14.23
2014-01-06	09:15:00	2014-01-06 09:15:00	93.8	11.9444	15.15	88.7231	7.87634	15.12	129.136	12.1687	14.28	106.545	11.5967	14.35	97.22	16.958	14.17	99.63	16.2296	14.19
2014-01-06	09:30:00	2014-01-06 09:30:00	91.1	11.284	15.19	86.4231	7.47937	15.16	126.936	11.6704	14.39	105.645	10.3944	14.56	97.52	16.8035	14.19	101.83	15.9621	14.2
2014-01-06	09:45:00	2014-01-06 09:45:00	85.5	10.6763	15.29	79.1231	6.84928	15.23	122.536	10.8882	14.56	95.4455	8.78565	14.83	91.52	16.3675	14.24	95.23	15.6466	14.28
2014-01-06	10:00:00	2014-01-06 10:00:00	77.8	9.61967	15.5	70.6231	5.45723	15.42	116.736	9.73634	14.78	88.2455	7.46413	15.03	87.62	15.7652	14.38	81.33	15.3207	14.41
2014-01-06	10:15:00	2014-01-06 10:15:00	70.8	8.89375	15.57	72.7231	3.9655	15.57	109.436	8.62883	14.97	86.1455	6.28141	15.19	82.52	15.2884	14.5	73.43	14.9739	14.48
2014-01-06	10:30:00	2014-01-06 10:30:00	65.6	8.10099	15.65	60.8231	2.85528	15.67	104.636	7.52763	15.13	75.4455	5.89679	15.24	69.52	14.2449	14.71	70.43	14.459	14.72
2014-01-06	10:45:00	2014-01-06 10:45:00	60.4	7.13467	15.75	57.4231	1.63982	15.76	99.1364	6.95524	15.21	76.3455	5.46466	15.3	66.82	13.5535	14.97	63.13	13.7481	15.01
2014-01-06	11:00:00	2014-01-06 11:00:00	57.2	6.24636	15.8	50.3231	0.961381	15.81	93.5364	6.04391	15.34	75.2455	3.77528	15.52	60.32	13.2288	14.99	64.43	13.2819	15.02
2014-01-06	11:15:00	2014-01-06 11:15:00	52	5.47456	15.83	44.4231	0.758826	15.83	90.5364	5.27429	15.43	65.0455	3.08625	15.57	59.22	12.2506	15.14	65.83	12.5601	15.15
2014-01-06	11:30:00	2014-01-06 11:30:00	49.3	4.80941	15.79	45.1231	0.560588	15.8	88.0364	4.60637	15.47	61.7455	2.57217	15.58	58.62	11.5572	15.26	54.03	11.7968	15.21
2014-01-06	11:45:00	2014-01-06 11:45:00	46.8	4.24371	15.75	42.7231	0.517462	15.75	84.5364	4.05484	15.48	59.5455	2.07774	15.59	52.72	10.9798	15.3	49.93	11.061	15.26
2014-01-06	12:00:00	2014-01-06 12:00:00	44.1	3.76567	15.68	39.2231	0.458386	15.66	80.5364	3.46634	15.5	52.8455	1.83392	15.57	48.72	10.35	15.34	52.53	10.5849	15.15
2014-01-06	12:15:00	2014-01-06 12:15:00	45.2	3.32815	15.65	40.1231	0.519509	15.61	80.7364	3.02011	15.5	58.5455	1.6713	15.56	48.12	10.1833	15.35	47.83	10.087	15.06
2014-01-06	12:30:00	2014-01-06 12:30:00	45.7	2.98709	15.68	41.9231	0.488871	15.66	82.1364	2.71225	15.54	61.3455	1.60615	15.58	50.42	9.42806	15.37	52.83	9.53677	15.16
2014-01-06	12:45:00	2014-01-06 12:45:00	46.4	2.71459	15.74	42.9231	0.50928	15.74	81.3364	2.47679	15.58	59.3455	1.56806	15.59	48.72	8.95041	15.41	53.13	8.79594	15.38
2014-01-06	13:00:00	2014-01-06 13:00:00	47.4	2.48609	15.82	42.7231	0.356018	15.78	82.5364	2.28233	15.59	56.3455	1.14999	15.63	50.22	8.42096	15.45	48.63	8.52356	15.28
2014-01-06	13:15:00	2014-01-06 13:15:00	48.4	2.27541	15.84	45.3231	0.430081	15.76	82.9364	2.09836	15.57	63.2455	1.17184	15.61	52.32	8.53896	15.34	57.73	8.09844	15.24
2014-01-06	13:30:00	2014-01-06 13:30:00	49.7	2.09836	15.83	46.7231	0.375923	15.68	84.5364	1.93161	15.54	64.7455	1.33892	15.54	51.02	7.95287	15.3	56.53	7.56066	15.34
2014-01-06	13:45:00	2014-01-06 13:45:00	50.2	1.94527	15.77	46.9231	0.383908	15.62	85.5364	1.91113	15.47	60.6455	1.4765	15.49	54.02	7.89929	15.24	53.83	6.96282	15.4
2014-01-06	14:00:00	2014-01-06 14:00:00	53.1	1.81353	15.72	52.5231	0.521557	15.64	88.9364	1.97946	15.36	67.5455	0.948477	15.56	55.82	7.42098	15.18	58.93	6.69562	15.37
2014-01-06	14:15:00	2014-01-06 14:15:00	57.9	1.69832	15.64	55.4231	0.415984	15.63	91.8364	1.82939	15.36	74.1455	0.758826	15.53	61.12	7.05881	15.18	63.73	6.28141	15.41
2014-01-06	14:30:00	2014-01-06 14:30:00	62.4	1.60167	15.57	59.8231	0.39391	15.62	96.4364	1.55687	15.44	76.9455	0.666412	15.54	61.52	6.82407	15.15	65.13	5.89679	15.36
2014-01-06	14:45:00	2014-01-06 14:45:00	65.6	1.51664	15.49	64.1231	0.4665	15.4	100.736	1.4765	15.45	81.7455	0.748277	15.35	72.62	6.40419	15.15	75.03	5.57368	15.25
2014-01-06	15:00:00	2014-01-06 15:00:00	71.4	1.4409	15.42	68.2231	0.440173	15.31	105.236	1.42534	15.42	83.2455	0.799022	15.26	74.32	6.12883	15.19	77.83	5.39537	15.16
2014-01-06	15:15:00	2014-01-06 15:15:00	69.9	1.37654	15.32	68.9231	0.46853	15.33	106.636	1.43423	15.34	84.5455	0.843639	15.21	76.22	6.14132	15.16	79.13	5.34345	15.05
2014-01-06	15:30:00	2014-01-06 15:30:00	76.9	1.32125	15.25	70.6231	0.422021	15.33	111.436	1.41424	15.27	91.6455	1.01314	15.15	78.62	6.41924	15.1	84.13	5.27676	14.96
2014-01-06	15:45:00	2014-01-06 15:45:00	78.7	1.25955	15.25	73.8231	0.415984	15.32	114.536	1.34777	15.19	95.2455	2.05942	15.05	78.92	6.81147	15.01	89.23	5.23234	14.87
2014-01-06	16:00:00	2014-01-06 16:00:00	83.6	1.19591	15.24	83.1231	0.405938	15.24	118.136	1.29919	15.11	98.3455	5.92171	14.77	87.72	6.69058	14.92	84.93	5.23727	14.78
2014-01-06	16:15:00	2014-01-06 16:15:00	84.1	1.13908	15.21	85.2231	0.935587	15.06	121.436	1.29037	15.04	98.9455	7.22578	14.59	90.92	7.05881	14.82	89.33	5.40279	14.6
2014-01-06	16:30:00	2014-01-06 16:30:00	88.2	1.13689	15.07	93.0231	1.94983	14.89	125.436	2.064	14.83	110.145	7.7693	14.41	93.42	9.50311	14.6	97.73	5.81215	14.25
2014-01-06	16:45:00	2014-01-06 16:45:00	90.3	1.18058	14.98	88.9231	2.25235	14.76	127.136	3.25923	14.6	103.845	8.1956	14.33	94.72	11.0243	14.3	101.13	6.20633	14.2
2014-01-06	17:00:00	2014-01-06 17:00:00	93.8	1.21782	14.9	89.6231	4.3846	14.55	127.836	4.35299	14.41	107.345	8.6237	14.3	98.52	11.3023	14.22	92.63	6.60255	14.19
2014-01-06	17:15:00	2014-01-06 17:15:00	96.1	1.26175	14.79	92.8231	4.79226	14.49	131.336	5.40774	14.21	110.645	8.71621	14.28	98.52	10.9929	14.17	103.73	6.97039	14.18
2014-01-06	17:30:00	2014-01-06 17:30:00	94.5	1.3987	14.6	92.6231	4.48441	14.47	130.736	6.13882	14.1	107.745	8.77021	14.25	99.62	11.3627	14.14	101.13	7.29672	14.17
2014-01-06	17:45:00	2014-01-06 17:45:00	95	1.56135	14.49	94.5231	4.60149	14.42	131.336	6.68303	14.04	111.045	8.84998	14.22	102.12	11.3759	14.11	102.33	7.60388	14.12
2014-01-06	18:00:00	2014-01-06 18:00:00	93	1.69832	14.43	91.1231	4.11288	14.37	129.836	6.9401	13.95	107.445	8.88345	14.17	100.42	11.4232	14.08	98.23	7.88399	14.04
2014-01-06	18:15:00	2014-01-06 18:15:00	93.8	2.02512	14.42	90.5231	4.94433	14.32	129.836	6.96534	13.92	110.445	8.521	14.05	92.02	11.3102	14.03	101.13	8.11377	13.93
2014-01-06	18:30:00	2014-01-06 18:30:00	90.2	2.44197	14.38	87.2231	6.14132	14.31	125.136	6.21384	13.86	104.145	7.15997	13.97	92.02	11.0584	13.97	91.23	8.3031	13.78
2014-01-06	18:45:00	2014-01-06 18:45:00	88.2	2.84353	14.36	83.9231	3.94138	14.27	122.336	5.14358	13.86	101.145	6.98554	13.97	91.62	10.6606	13.91	93.13	8.4466	13.72
2014-01-06	19:00:00	2014-01-06 19:00:00	83.9	2.90935	14.25	81.4231	3.90281	14.21	119.436	4.40649	13.91	98.7455	8.03456	13.96	87.82	10.1599	13.9	88.03	8.51843	13.69
2014-01-06	19:15:00	2014-01-06 19:15:00	80.8	2.5419	14.07	78.4231	2.96116	14.09	115.936	3.78009	13.93	95.1455	7.05123	13.9	84.92	9.55749	13.9	87.83	8.46969	13.76
2014-01-06	19:30:00	2014-01-06 19:30:00	80.8	2.26387	14.06	78.8231	4.67479	14.12	115.936	3.22837	13.93	93.7455	7.1119	13.84	84.02	8.9298	13.92	85.93	8.43635	13.77
2014-01-06	19:45:00	2014-01-06 19:45:00	80	2.11211	14.19	76.8231	1.84753	14.11	115.236	2.81536	13.92	93.4455	6.97797	13.82	82.72	8.35689	13.93	85.13	8.55693	13.73
2014-01-06	20:00:00	2014-01-06 20:00:00	75.1	1.99087	14.42	74.0231	1.94527	14.38	111.536	2.46286	13.82	90.6455	8.34664	13.94	81.12	7.87889	13.92	87.63	8.5364	13.73
2014-01-06	20:15:00	2014-01-06 20:15:00	73	1.86568	14.51	68.2231	0.924856	14.46	108.436	2.12587	13.8	85.4455	4.51609	13.92	72.02	7.59879	13.88	81.73	8.30566	13.68
2014-01-06	20:30:00	2014-01-06 20:30:00	74.2	1.78863	14.5	72.7231	0.678956	14.5	109.636	1.93388	13.78	86.7455	3.35433	13.99	78.52	7.14226	13.81	75.43	8.08821	13.57
2014-01-06	20:45:00	2014-01-06 20:45:00	69.4	1.75246	14.46	66.8231	0.252134	14.29	106.136	1.81353	13.8	81.5455	2.43502	14.13	77.92	6.91486	13.72	72.63	7.85084	13.42
2014-01-06	21:00:00	2014-01-06 21:00:00	67.4	1.65331	14.44	62.6231	0.290993	14.41	104.436	1.72763	13.89	82.1455	2.19019	14.1	72.92	6.58998	13.64	73.03	7.57083	13.31
2014-01-06	21:15:00	2014-01-06 21:15:00	64.4	1.41646	14.42	58.8231	0.326331	14.36	100.636	1.68706	13.97	77.1455	2.05027	14.02	70.32	6.49452	13.72	72.43	7.30939	13.36
2014-01-06	21:30:00	2014-01-06 21:30:00	61.3	1.31022	14.39	57.8231	0.2348	14.29	96.5364	1.63982	13.95	75.2455	2.05942	13.93	65.72	6.43178	13.73	65.13	7.05881	13.47
2014-01-06	21:45:00	2014-01-06 21:45:00	58.3	1.26395	14.37	53.0231	0.211849	14.28	94.3364	1.6084	13.89	73.5455	2.09836	13.81	62.22	6.37661	13.69	59.63	6.81903	13.38
2014-01-06	22:00:00	2014-01-06 22:00:00	54.5	1.21563	14.44	50.3231	0.200447	14.3	92.0364	1.56135	13.83	67.2455	1.9521	13.66	57.52	6.17132	13.61	60.03	6.58747	13.27
2014-01-06	22:15:00	2014-01-06 22:15:00	51.1	1.15872	14.45	45.8231	0.196658	14.3	87.4364	1.47873	13.79	61.5455	1.77054	13.64	55.92	5.79224	13.54	52.33	6.36909	13.14
2014-01-06	22:30:00	2014-01-06 22:30:00	48.2	1.11292	14.47	41.9231	0.194765	14.24	82.8364	1.28376	13.82	59.3455	1.59494	13.59	56.32	5.3657	13.4	52.03	6.16382	13.02
2014-01-06	22:45:00	2014-01-06 22:45:00	44.1	1.07161	14.51	39.4231	0.190985	14.33	80.1364	1.08899	13.81	53.8455	1.23318	13.6	48.92	5.00084	13.26	43.93	5.97406	12.89
2014-01-06	23:00:00	2014-01-06 23:00:00	42.3	1.03043	14.55	36.0231	0.190985	14.4	77.8364	0.957078	13.76	53.4455	0.976453	13.6	46.62	4.76287	13.11	44.23	5.78976	12.76
2014-01-06	23:15:00	2014-01-06 23:15:00	39.8	0.989387	14.48	34.3231	0.202344	14.31	75.2364	0.875627	13.69	50.3455	0.691519	13.62	45.42	4.57708	12.99	41.83	5.61833	12.61
2014-01-06	23:30:00	2014-01-06 23:30:00	38	0.950627	14.35	33.7231	0.200447	14.16	73.7364	0.815996	13.61	47.5455	0.548238	13.61	41.22	4.54536	12.84	39.83	5.41764	12.49
2014-01-06	23:45:00	2014-01-06 23:45:00	36.8	0.916279	14.18	31.7231	0.206142	13.97	71.7364	0.782077	13.55	47.1455	0.523606	13.55	39.72	4.64301	12.57	39.73	5.21014	12.39
2014-01-07	00:00:00	2014-01-07	34.5	0.882036	13.98	28.3231	0.196658	13.79	69.0364	0.748277	13.51	43.8455	0.45636	13.42	36.92	4.60393	12.3	36.33	5.05741	12.03
2014-01-07	00:15:00	2014-01-07 00:15:00	33.2	0.847899	13.78	26.5231	0.204242	13.57	68.4364	0.7167	13.5	41.4455	0.432098	13.38	36.72	4.51853	12.07	32.53	4.90996	11.77
2014-01-07	00:30:00	2014-01-07 00:30:00	31.3	0.815996	13.68	24.0231	0.229045	13.35	66.8364	0.689424	13.53	39.9455	0.420008	13.34	34.82	4.30439	11.94	31.03	4.76532	11.62
2014-01-07	00:45:00	2014-01-07 00:45:00	29.3	0.786311	13.89	22.3231	0.240567	13.14	64.6364	0.670591	13.61	37.4455	0.415984	13.29	33.12	3.96309	12.15	28.83	4.63568	11.47
2014-01-07	01:00:00	2014-01-07 01:00:00	28.2	0.752495	14.07	20.8231	0.275396	12.89	61.8364	0.668502	13.69	37.5455	0.413973	13.23	28.72	3.72004	12.38	28.03	4.51122	11.37
2014-01-07	01:15:00	2014-01-07 01:15:00	28.2	0.72511	14.19	23.3231	0.265683	12.6	62.2364	0.639299	13.74	39.8455	0.413973	13.15	30.82	3.54278	12.46	31.93	4.36757	11.52
2014-01-07	01:30:00	2014-01-07 01:30:00	28	0.706199	14.19	23.6231	0.267624	12.29	61.7364	0.618505	13.73	39.8455	0.401925	13.1	31.42	3.46873	12.38	31.63	4.23886	11.7
2014-01-07	01:45:00	2014-01-07 01:45:00	29.4	0.689424	13.8	26.3231	0.246345	12.29	63.1364	0.587421	13.73	42.5455	0.371935	13.44	30.42	3.38528	12.43	33.93	4.13709	11.38
2014-01-07	02:00:00	2014-01-07 02:00:00	30.4	0.674773	13.06	27.6231	0.290993	12.03	64.2364	0.560588	13.72	42.9455	0.29686	14	31.12	3.3115	12.38	34.83	4.03551	11.12
2014-01-07	02:15:00	2014-01-07 02:15:00	35.2	0.660147	11.96	31.4231	0.257934	11.57	67.9364	0.537963	13.73	49.7455	0.287087	13.96	35.82	3.20228	12.42	39.73	3.91004	11.93
2014-01-07	02:30:00	2014-01-07 02:30:00	37.3	0.645548	11.44	35.7231	0.25987	11.37	70.2364	0.521557	13.69	52.5455	0.281237	13.64	38.82	3.35195	11.93	43.03	3.7897	12.68
2014-01-07	02:45:00	2014-01-07 02:45:00	40.4	0.633055	11.01	39.6231	0.273451	11.19	73.2364	0.51337	13.58	56.7455	0.334227	13.42	41.12	3.15962	11.94	50.13	3.67446	12.92
2014-01-07	03:00:00	2014-01-07 03:00:00	42.5	0.618505	10.89	40.6231	0.277342	10.92	77.0364	0.533858	13.37	56.3455	0.383908	13.65	46.22	3.03428	12.24	51.63	3.57148	13.04
2014-01-07	03:15:00	2014-01-07 03:15:00	44.5	0.603983	10.98	42.1231	0.28904	10.73	80.3364	0.55441	13.12	59.3455	0.371935	13.68	48.92	3.05081	12.12	52.03	3.4735	13.06
2014-01-07	03:30:00	2014-01-07 03:30:00	48.1	0.593627	11.29	46.7231	0.277342	10.53	81.2364	0.585353	12.93	63.6455	0.371935	13.54	46.42	2.99888	12.14	53.03	3.39481	12.61
2014-01-07	03:45:00	2014-01-07 03:45:00	49.7	0.58122	11.38	48.6231	0.279289	10.81	85.6364	0.608129	12.84	67.2455	0.385907	13.32	52.12	2.91877	12.13	55.73	3.31388	12.63
[truncated: 49,210 more rows]
